# Supplementary material for: Zinc Finger Transcription Factors Displaced SREBP Proteins as the Major Sterol Regulators during Saccharomycotina Evolution
Source: PLoS Genet. 2014 Jan 16;10(1):e1004076. doi: 10.1371/journal.pgen.1004076 (PMC3894159; doi:10.1371/journal.pgen.1004076)
Supplement: Table S2 — RNA-seq analysis of differentially expressed genes in Y. lipolytica. (XLSX) [file pgen.1004076.s009.xlsx]

## Sheet: Wildtype Hypoxia -v-Normoxia
Table S2. RNA-seq analysis of differentially expressed genes in Y. lipolytica.
Legend
ID	Yarrowia lipolytica gene ID
Fold Change	Fold change of genes in hypoxia compared to normoxia (Inf = divided by 0)
log2FoldChange	binary log of the fold change
pval	uncorrected p-value
padj	p-value adjusted for multiple testing using Benjamini-Hochberg method
regulation (Hyp)	Up regulated or Down regulated in hypoxia
Yarrowia short name	Gene name
Yarrowia Description	Description of Yarrowia gene from http://genolevures.org/
Scer ortholog/homolog	Saccharomyces cerevisiae ortholog/homolog
Scer Short Name	Gene name of the S. cerevisiae homolog
Similar to	Similar to but not bidirectional BLAST match
Scer Description	Description of the S.cerevisiae homolog from YeastGenomeDatabase.org
Pfam domain	Domain predicted using Pfam database
Calb ortholog	Candida albicans ortholog
Calb Description	Description of the C. albicans ortholog from CandidaGenomeDatabase.org
ID	fold change	log2FoldChange	pval	padj	regulation (Hyp)	Yarrowia short name	Yarrowia Description	Scer ortholog/homolog	Scer Short Name	Scer Description	similar to	Pfam domain	Calb ortholog/homolog	Calb Description
YALI0D18832g	Inf	Inf	1.15882e-09	1.22496e-08	UP		similar to uniprot|Q6CDB7 Yarrowia lipolytica YALI0C01925g, hypothetical start					BTB/POZ domain
YALI0E29777g	Inf	Inf	0.00025683	0.000972373	UP		weakly similar to CA1588|CaSPT8 Candida albicans CaSPT8 transcriptional adaptor or co-activator (by homology), hypothetical start
YALI0B17270g	Inf	Inf	0.00108613	0.0034867	UP		weakly similar to uniprot|Q96VQ3 Saccharomyces cerevisiae YGR225W Ama1p (Fragment)	YGR225W	AMA1	Activator of meiotic anaphase promoting complex (APC/C); Cdc20p family member; required for initiation of spore wall assembly; required for Clb1p degradation during meiosis		WD domain, G-beta repeat	orf19.5954
YALI0D17644g	0	-Inf	0.00952659	0.023527	DOWN		no similarity, hypothetical start
YALI0B20702g	0	-Inf	0.00233899	0.00685405	DOWN		similar to uniprot|O74128 Yarrowia lipolytica ALK2	YDR402C	DIT2	N-formyltyrosine oxidase, sporulation-specific microsomal enzyme involved in the production of N,N-bisformyl dityrosine required for spore wall maturation, homologous to cytochrome P-450s		Cytochrome P450
YALI0C02981g	737.81	9.52711	4.68119e-27	2.253e-25	UP		weakly similar to uniprot|P47000 Saccharomyces cerevisiae YJL159w HSP150 member of the PIR1P/HSP150P/PIR3P family P5.2.f4.1	YKL163W	PIR3	O-glycosylated covalently-bound cell wall protein required for cell wall stability; expression is cell cycle regulated, peaking in M/G1 and also subject to regulation by the cell integrity pathway	SIMILAR TO	Yeast PIR protein repeat
YALI0E28314g	537.32	9.06964	1.88459e-28	9.89486e-27	UP		no similarity, hypothetical start
YALI0D15092g	377.94	8.56201	7.29936e-14	1.21078e-12	UP		similar to uniprot|Q8LE51 Arabidopsis thaliana Yippee- like protein 26S proteasome non-ATPase regulatory subunit	YBL049W	MOH1	Protein of unknown function, has homology to kinase Snf7p; not required for growth on nonfermentable carbon sources; essential for viability in stationary phase		Yippee putative zinc-binding protein	MOH1	Protein similar to S. cerevisiae Moh1p; transcription is induced in response to alpha pheromone in SpiderM medium; transcriptionally activated by Mnl1p under weak acid stress; possibly essential gene, disruptants not obtained by UAU1 method
YALI0E34265g	298.192	8.2201	2.35766e-100	1.49782e-96	UP		similar to uniprot|P06115 Saccharomyces cerevisiae YGR088w CTT1 catalase T cytosolic P2.391.f2.1	YGR088W	CTT1	Cytosolic catalase T, has a role in protection from oxidative damage by hydrogen peroxide	SIMILAR TO	Catalase-related immune-responsive Catalase
YALI0D22352g	236.24	7.88411	9.58175e-52	1.90228e-49	UP		highly similar to uniprot|P22202 Saccharomyces cerevisiae YER103w SSA4 heat shock protein of HSP70 family cytosolic	YBL075C	SSA3	ATPase involved in protein folding and the response to stress; plays a role in SRP-dependent cotranslational protein-membrane targeting and translocation; member of the heat shock protein 70 (HSP70) family; localized to the cytoplasm	SIMILAR TO	Hsp70 protein
YALI0B03542g	169.371	7.40405	2.73094e-19	7.74539e-18	UP		no similarity, hypothetical start
YALI0A00682g	158.42	7.30761	1.28251e-41	1.38098e-39	UP		no similarity, hypothetical start
YALI0E18634g	151.849	7.24649	5.05643e-93	1.60618e-89	UP		Malic enzyme	YKL029C	MAE1	Mitochondrial malic enzyme, catalyzes the oxidative decarboxylation of malate to pyruvate, which is a key intermediate in sugar metabolism and a precursor for synthesis of several amino acids		Malic enzyme, NAD binding domain Malic enzyme, N-terminal domain	MAE1	Malic enzyme, mitochondrial; transcription regulated by Mig1p and Tup1p; shows colony morphology-related gene regulation by Ssn6p
YALI0E06589g	145.179	7.18169	1.93258e-06	1.17828e-05	UP		similar to uniprot|Q6C1D8 Yarrowia lipolytica YALI0F17182g, start by similarity					Polyketide cyclase / dehydrase and lipid transport
YALI0A04873g	144.985	7.17976	2.66622e-45	3.60394e-43	UP		no similarity, hypothetical start
YALI0D10945g	142.512	7.15494	8.50084e-25	3.60039e-23	UP		no similarity, hypothetical start
YALI0F01452g	134.497	7.07143	9.83198e-78	8.92323e-75	UP		no similarity, hypothetical start
YALI0E33891g	130.937	7.03273	6.50141e-67	2.75357e-64	UP		similar to DEHA0A01298g Debaryomyces hansenii IPF 95.1, hypothetical start					Yeast PIR protein repeat
YALI0E24189g	129.679	7.0188	4.77745e-08	3.86639e-07	UP		no similarity, hypothetical start
YALI0D27236g	127.542	6.99483	1.55142e-17	3.66401e-16	UP		weakly similar to uniprot|Q9XTH4 Caenorhabditis elegans Hypothetical protein K08H10.2a, hypothetical start
YALI0D09427g	119.801	6.9045	4.73591e-63	1.67151e-60	UP		weakly similar to uniprot|O74959 Schizosaccharomyces pombe Hypothetical short chain dehydrogenase, start by similarity					short chain dehydrogenase	orf19.320
YALI0A17020g	113.941	6.83214	1.45481e-47	2.24918e-45	UP		no similarity, hypothetical start
YALI0F29975g	111.126	6.79605	4.65659e-17	1.04535e-15	UP		weakly similar to uniprot|P38004 Chlamydia trachomatis 3- oxoacyl-[acyl-carrier protein] reductase	YKL055C	OAR1	Mitochondrial 3-oxoacyl-[acyl-carrier-protein] reductase, may comprise a type II mitochondrial fatty acid synthase along with Mct1p	SIMILAR TO	short chain dehydrogenase
YALI0C05258g	111.109	6.79583	2.47024e-69	1.30779e-66	UP		weakly similar to uniprot|P38840 Saccharomyces cerevisiae YHR137w ARO9 aromatic amino acid aminotransferase II	YHR137W	ARO9	Aromatic aminotransferase II, catalyzes the first step of tryptophan, phenylalanine, and tyrosine catabolism		Aminotransferase class I and II	ARO9	Aromatic transaminase of the Ehrlich fusel oil pathway of aromatic alcohol biosynthesis; Rim101p-dependent pH-regulation (alkaline induced)
YALI0D24816g	108.686	6.76402	8.92436e-90	1.41741e-86	UP		no similarity, hypothetical start
YALI0A19910g	100.841	6.65593	8.41625e-68	3.81917e-65	UP		similar to uniprot|P47137 Saccharomyces cerevisiae Probable oxidoreductase YJR096W	YJR096W		Putative xylose and arabinose reductase; member of the aldo-keto reductase (AKR) family; GFP-fusion protein is induced in response to the DNA-damaging agent MMS	SIMILAR TO	Aldo/keto reductase family
YALI0C03564g	100.825	6.65571	1.69065e-21	5.59412e-20	UP		no similarity, hypothetical start					Helix-loop-helix DNA-binding domain
YALI0E14707g	100.272	6.64777	9.24585e-85	1.17478e-81	UP		no similarity, hypothetical start					Kelch motif
YALI0D00451g	99.1182	6.63108	3.82504e-84	4.05008e-81	UP		weakly similar to KLLA0E14586g Kluyveromyces lactis IPF 2857.1, hypothetical start
YALI0E34441g	97.9414	6.61385	3.03922e-08	2.54725e-07	UP		no similarity, hypothetical start
YALI0C10626g	96.7872	6.59674	1.42311e-35	1.20547e-33	UP		no similarity, hypothetical start					F-box-like
YALI0F19492g	91.5125	6.5159	2.32905e-17	5.38052e-16	UP		no similarity, hypothetical start
YALI0D20482g	86.8948	6.4412	8.91055e-71	5.14625e-68	UP		some similarities with uniprot|P78688 Gibberella fujikuroi Nitrogen regulatory protein areA	YFL021W	GAT1	Transcriptional activator of genes involved in nitrogen catabolite repression; contains a GATA-1-type zinc finger DNA-binding motif; activity and localization regulated by nitrogen limitation and Ure2p	SIMILAR TO	GATA zinc finger	GAT1	Zinc finger transcriptional regulator of nitrogen utilization; required for nitrogen catabolite repression and utilization of isoleucine, tyrosine and tryptophan N sources; required for virulence in a mouse systemic infection model
YALI0B04202g	86.8052	6.43971	3.89798e-29	2.24408e-27	UP		similar to uniprot|P33413 Saccharomyces cerevisiae YHL016c DUR3 urea transport protein	YHL016C	DUR3	Plasma membrane transporter for both urea and polyamines, expression is highly sensitive to nitrogen catabolite repression and induced by allophanate, the last intermediate of the allantoin degradative pathway		Sodium:solute symporter family	orf19.781	Major urea transporter; expression is induced by urea; fungal-specific (no human or murine homolog); not required for virulence in a mouse intravenous model
YALI0F01408g	83.7961	6.38881	4.75634e-73	3.0217e-70	UP		some similarities with uniprot|Q88HQ7 Pseudomonas putida YeeE/YedE family protein and uniprot|Q8Y299 Ralstonia solanacearum Probable transmembrane protein, hypothetical start					Sulphur transport
YALI0C12166g	83.0672	6.37621	2.36112e-64	8.82364e-62	UP		no similarity, hypothetical start
YALI0F07062g	78.322	6.29135	4.0058e-66	1.59055e-63	UP		similar to uniprot|Q07824 Saccharomyces cerevisiae YLL028w TPO1 polyamine transport protein	YLL028W	TPO1	Polyamine transporter that recognizes spermine, putrescine, and spermidine; catalyzes uptake of polyamines at alkaline pH and excretion at acidic pH; phosphorylation enhances activity and sorting to the plasma membrane		Major Facilitator Superfamily	FLU1	Multidrug efflux pump of the plasma membrane; MDR family member of the MFS (major facilitator superfamily) of transporters; preferred substrate may be mycophenolic acid; fungal-specific (no human or murine homolog)
YALI0D09933g	77.8734	6.28306	2.83143e-77	2.24851e-74	UP		Alternative oxidase (EC 1.-.-.-)					Alternative oxidase	AOX2	Alternative oxidase; induced by antimycin A, some oxidants; growth- and carbon-source-regulated; one of two isoforms (Aox1p and Aox2p); involved in cyanide-resistant respiratory pathway that is absent from S. cerevisiae
YALI0E28259g	76.7244	6.26161	1.906e-16	4.03627e-15	UP		some similarities with uniprot|Q6C7W6 Yarrowia lipolytica YALI0D24816g, identified by cDNA
YALI0D08228g	72.4108	6.17813	3.33386e-19	9.3304e-18	UP		uniprot|Q9P8M1 Yarrowia lipolytica ADP/ATP carrier protein Aac1p	YBL030C	PET9	Major ADP/ATP carrier of the mitochondrial inner membrane, exchanges cytosolic ADP for mitochondrially synthesized ATP; phosphorylated; required for viability in many common lab strains carrying a mutation in the polymorphic SAL1 gene	SIMILAR TO	Mitochondrial carrier protein
YALI0C03696g	69.7413	6.12394	3.26815e-24	1.32246e-22	UP		weakly similar to uniprot|P38191 Saccharomyces cerevisiae Yippee-like protein YBL049W	YBL049W	MOH1	Protein of unknown function, has homology to kinase Snf7p; not required for growth on nonfermentable carbon sources; essential for viability in stationary phase	SIMILAR TO	Yippee putative zinc-binding protein
YALI0A06435g	69.1048	6.11071	1.22185e-61	4.08549e-59	UP		similar to uniprot|P09232 Saccharomyces cerevisiae YEL060c PRB1 protease B vacuolar	YEL060C	PRB1	Vacuolar proteinase B (yscB), a serine protease of the subtilisin family; involved in protein degradation in the vacuole and required for full protein degradation during sporulation	SIMILAR TO	Subtilase family Peptidase inhibitor I9
YALI0F00682g	65.9069	6.04236	3.86898e-56	1.02415e-53	UP		similar to uniprot|Q04432 Saccharomyces cerevisiae YDR533c hypothetical protein and CAGL0C00275g Candida glabrata and KLLA0D00704g Kluyveromyces lactis or KLLA0D00682g Kluyveromyces lactis	YDR533C	HSP31	Possible chaperone and cysteine protease with similarity to E. coli Hsp31; member of the DJ-1/ThiJ/PfpI superfamily, which includes human DJ-1 involved in Parkinson's disease; exists as a dimer and contains a putative metal-binding site	SIMILAR TO	DJ-1/PfpI family	orf19.251	ThiJ/PfpI protein; antigenic (Cand a 3 allergen); binds human immunoglobulin E; 2 N-glycosylation motifs; alkaline, fluconazole, Hog1p-downregulated; induced in core stress response or by oxidative stress (via Cap1p); induced by hypoxia
YALI0C22394g	63.1352	5.98037	9.13774e-15	1.68267e-13	UP		weakly similar to uniprot|P41928 Yarrowia lipolytica MTP2 Metallothionein-II, start by similarity
YALI0D07304g	60.9405	5.92933	7.0122e-16	1.41424e-14	UP		similar to uniprot|P40088 Saccharomyces cerevisiae YER145c FTR1 iron permease that mediates high-affinity iron uptake	YER145C	FTR1	High affinity iron permease involved in the transport of iron across the plasma membrane; forms complex with Fet3p; expression is regulated by iron		Iron permease FTR1 family	FTR1	High-affinity iron permease (ferric citrate, ferrioxamines E or B, transferrin); required for mouse virulence, low-iron growth; iron, amphotericin B, caspofungin, ciclopirox, Hog1p regulated; complements S. cerevisiae ftr1 iron transport
YALI0B07117g	57.1933	5.83777	2.48951e-74	1.75732e-71	UP		similar to uniprot|P14065 Saccharomyces cerevisiae YOR120w GCY1 galactose-induced protein of aldo/keto reductase family	YOR120W	GCY1	Putative NADP(+) coupled glycerol dehydrogenase, proposed to be involved in an alternative pathway for glycerol catabolism; member of the aldo-keto reductase (AKR) family		Aldo/keto reductase family	GCY1	mutation confers hypersensitivity to toxic ergosterol analog; farnesol-downregulated; protein detected by mass spec in stationary phase cultures
YALI0B21142g	56.9276	5.83106	2.28538e-51	4.3997e-49	UP		similar to KLLA0E03729g Kluyveromyces lactis IPF 3594.1	YPR156C	TPO3	Polyamine transport protein specific for spermine; localizes to the plasma membrane; member of the major facilitator superfamily		Major Facilitator Superfamily	TPO3	Possible role in polyamine transport; MFS-MDR family; transcription induced by Sfu1p, regulated upon white-opaque switching; decreased expression in hyphae compared to yeast-form cells; regulated by Nrg1p; fungal-specific
YALI0F26543g	56.9166	5.83078	1.60624e-55	3.92479e-53	UP		weakly similar to uniprot|O60930 Homo sapiens ribonuclease H1, hypothetical start					RNase H Caulimovirus viroplasmin
YALI0C05511g	56.8959	5.83025	6.10918e-07	4.05555e-06	UP		weakly similar to uniprot|Q06705 Saccharomyces cerevisiae YLR380w CSR1 weak similarity to SEC14 protein	YLR380W	CSR1	Phosphatidylinositol transfer protein with a potential role in regulating lipid and fatty acid metabolism under heme-depleted conditions; interacts specifically with thioredoxin peroxidase; may have a role in oxidative stress resistance	SIMILAR TO	CRAL/TRIO, N-terminal domain CRAL/TRIO domain
YALI0B21450g	56.8079	5.82802	6.49412e-15	1.20635e-13	UP		similar to uniprot|Q12127 Saccharomyces cerevisiae YLR110c strong similarity to FLO1P, start by similarity					Flocculin type 3 repeat
YALI0E17281g	56.5948	5.8226	4.31122e-15	8.15154e-14	UP		similar to uniprot|Q12335 Saccharomyces cerevisiae YDR032c PST2 (Protoplast secreted protein 2 precursor) and Phanerochaete chrysosporium 1 4-benzoquinone reductase	YDR032C	PST2	Protein with similarity to members of a family of flavodoxin-like proteins; induced by oxidative stress in a Yap1p dependent manner; the authentic, non-tagged protein is detected in highly purified mitochondria in high-throughput studies	SIMILAR TO	Flavodoxin
YALI0A12441g	55.806	5.80235	2.71303e-31	1.75876e-29	UP		no similarity, hypothetical start
YALI0F30569g	55.165	5.78568	1.87337e-34	1.43392e-32	UP		similar to uniprot|P17064 Saccharomyces cerevisiae YER056c FCY2 purine-cytosine permease	YER056C	FCY2	Purine-cytosine permease, mediates purine (adenine, guanine, and hypoxanthine) and cytosine accumulation		Permease for cytosine/purines, uracil, thiamine, allantoin	FCY21	High affinity, high capacity, hypoxanthine-adenine-guanine-cytosine/ H+ symporter; purine-cytosine permease of pyrimidine salvage; similar to S. cerevisiae Fcy2p; mutation confers resistance to 5-fluorocytosine (5-FC)
YALI0E00836g	54.9948	5.78122	2.44137e-60	7.75502e-58	UP		similar to uniprot|P08465 Saccharomyces cerevisiae YNL277w MET2 homoserine O-acetyltransferase possible transmembrane segment	YNL277W	MET2	L-homoserine-O-acetyltransferase, catalyzes the conversion of homoserine to O-acetyl homoserine which is the first step of the methionine biosynthetic pathway		alpha/beta hydrolase fold
YALI0A00198g	54.3549	5.76434	0.000805768	0.00269268	UP		similar to uniprot|Q6CB50 Yarrowia lipolytica YALI0C21912g Unknown function, start by similarity
YALI0D08382g	52.0175	5.70093	0.00351408	0.00985213	UP		similar to uniprot|P25346 Saccharomyces cerevisiae YCR098c GIT1 glycerophosphoinositol transporter	YCR098C	GIT1	Plasma membrane permease, mediates uptake of glycerophosphoinositol and glycerophosphocholine as sources of the nutrients inositol and phosphate; expression and transport rate are regulated by phosphate and inositol availability		Sugar (and other) transporter	GIT1	Putative glycerophosphoinositol permease; fungal-specific (no human or murine homolog); transcription negatively regulated by Rim101p; virulence-group-correlated expression; possibly essential gene, disruptants not obtained by UAU1 method
YALI0C19338g	51.6964	5.69199	9.69074e-32	6.48056e-30	UP		no similarity, possibly noncoding, hypothetical start
YALI0E17171g	51.4807	5.68596	3.21691e-35	2.65416e-33	UP		similar to ca|CA1552|CaPUT1 Candida albicans CaPUT1 proline oxidase (by homology) , hypothetical start
YALI0F30107g	51.1542	5.67678	2.63396e-17	6.04099e-16	UP		no similarity, possibly noncoding, hypothetical start
YALI0E02024g	50.3526	5.65399	3.11378e-49	5.07227e-47	UP		no similarity, hypothetical start
YALI0D06754g	50.063	5.64567	7.32493e-21	2.28114e-19	UP		similar to uniprot|Q9P861 Arxula adeninivorans Ferro-O2- oxidoreductase precursor	YMR058W	FET3	Ferro-O2-oxidoreductase required for high-affinity iron uptake and involved in mediating resistance to copper ion toxicity, belongs to class of integral membrane multicopper oxidases	SIMILAR TO	Multicopper oxidase
YALI0F24937g	49.5375	5.63045	1.47531e-59	4.46316e-57	UP		similar to uniprot|P53111 Saccharomyces cerevisiae YGL157w unknown function	YGL157W		NADPH-dependent aldehyde reductase, utilizes aromatic and alophatic aldehyde substrates; member of the short-chain dehydrogenase/reductase superfamily	SIMILAR TO	NAD dependent epimerase/dehydratase family
YALI0A20152g	49.4267	5.62722	1.3657e-05	7.1001e-05	UP		highly similar to uniprot|P32324 Saccharomyces cerevisiae YOR133w and highly similar to uniprot|P32324 Saccharomyces cerevisiae YDR385W EFT1 translation elongation factor eEF2	YOR133W	EFT1	Elongation factor 2 (EF-2), also encoded by EFT2; catalyzes ribosomal translocation during protein synthesis; contains diphthamide, the unique posttranslationally modified histidine residue specifically ADP-ribosylated by diphtheria toxin	SIMILAR TO	Elongation factor Tu GTP binding domain Elongation factor Tu domain 2 Elongation factor G, domain IV Elongation factor G C-terminus
YALI0A12177g	49.2916	5.62327	1.29736e-24	5.35203e-23	UP		weakly similar to uniprot|Q12358 Saccharomyces cerevisiae Putative dioxygenase YLL057C	YLL057C	JLP1	Fe(II)-dependent sulfonate/alpha-ketoglutarate dioxygenase, involved in sulfonate catabolism for use as a sulfur source; contains sequence that resembles a J domain (typified by the E. coli DnaJ protein); induced by sulphur starvation	SIMILAR TO	Taurine catabolism dioxygenase TauD, TfdA family
YALI0D12078g	48.6896	5.60554	3.17888e-69	1.55349e-66	UP		some similarities with uniprot|Q99326 Saccharomyces cerevisiae ORF YOR338W	YOR338W		Putative protein of unknown function; YOR338W transcription is regulated by Azf1p and its transcript is a specific target of the G protein effector Scp160p; identified as being required for sporulation in a high-throughput mutant screen		SWIRM domain	orf19.1363	Plc1p-regulated; transcriptionally activated by Mnl1p under weak acid stress
YALI0D17534g	47.9172	5.58247	5.39147e-58	1.48922e-55	UP		similar to DEHA0G23430g Debaryomyces hansenii IPF 4879.1	YMR313C	TGL3	Triacylglycerol lipase of the lipid particle, responsible for all the TAG lipase activity of the lipid particle; contains the consensus sequence motif GXSXG, which is found in lipolytic enzymes; required with Tgl4p for timely bud formation		Domain of unknown function (DUF3336)	orf19.4699	Putative phospholipase of patatin family; similar to S. cerevisiae Ymr313p; predicted Kex2p substrate
YALI0A06974g	47.9011	5.58199	8.99742e-34	6.57019e-32	UP		similar to uniprot|O74885 Schizosaccharomyces pombe SPCC576.01c xanthine oxidase, hypothetical start					Taurine catabolism dioxygenase TauD, TfdA family	orf19.1461	possibly transcriptionally regulated upon hyphal formation
YALI0E07744g	47.2842	5.56329	1.49558e-18	3.86236e-17	UP		weakly similar to uniprot|P48016 Saccharomyces cerevisiae YPR026w ATH1 acid trehalase vacuolar	YPR026W	ATH1	Acid trehalase required for utilization of extracellular trehalose		Glycosyl hydrolase family 65, N-terminal domain Glycosyl hydrolase family 65 central catalytic domain	ATC1	Cell wall acid trehalase; catalyzes hydrolysis of the disaccharide trehalose; similar to S. cerevisiae vacuolar acid trehalase (Ath1p)
YALI0B01166g	47.1529	5.55927	3.5371e-18	8.84693e-17	UP	COS111	F-box protein COS111	YBR203W	COS111	Protein required for resistance to the antifungal drug ciclopirox olamine; not related to the subtelomerically-encoded COS family; the authentic, non-tagged protein is detected in highly purified mitochondria in high-throughput studies		F-box-like	orf19.4883	constitutive expression independent of MTL or white-opaque status
YALI0F16731g	46.8699	5.55059	1.07875e-12	1.60124e-11	UP		weakly similar to uniprot|Q06522 Saccharomyces cerevisiae YPR147c, hypothetical start					Uncharacterised conserved protein (DUF2305)
YALI0B19778g	46.7213	5.54601	9.34193e-29	5.03968e-27	UP		no similarity, hypothetical start
YALI0E11649g	45.97	5.52262	4.30651e-05	0.000199849	UP		similar to KLLA0A06710g Kluyveromyces lactis, hypothetical start
YALI0E01562g	45.8471	5.51876	1.20124e-11	1.58989e-10	UP		no similarity, hypothetical start
YALI0C20977g	45.5961	5.51084	6.54188e-13	9.96657e-12	UP		weakly similar to uniprot|Q6C189 Yarrowia lipolytica YALI0F18326g, hypothetical start
YALI0F29359g	45.3761	5.50386	9.35998e-53	1.91819e-50	UP		weakly similar to uniprot|Q99296 Saccharomyces cerevisiae YLR149c unknown function	YLR149C		Putative protein of unknown function; overexpression causes a cell cycle delay or arrest; null mutation results in a decrease in plasma membrane electron transport; YLR149C is not an essential gene		Uncharacterised protein domain (DUF2415)	orf19.5125	expression regulated during planktonic growth; transcript induced by ketoconazole
YALI0E20647g	42.9118	5.4233	3.96489e-54	8.5394e-52	UP		similar to uniprot|A5H0J3 Lachancea kluyveri URC4_SACKL, Uracil catabolism protein 4, hypothetical start					Protein of unknown function (DUF1688)
YALI0B01342g	42.674	5.41528	8.82706e-29	4.83434e-27	UP		similar to uniprot|P49374 Kluyveromyces lactis High- affinity glucose transporter	YDL138W	RGT2	Plasma membrane high glucose sensor that regulates glucose transport; contains 12 predicted transmembrane segments and a long C-terminal tail required for induction of hexose transporters; highly similar to Snf3p	SIMILAR TO	Sugar (and other) transporter
YALI0A01980g	42.6249	5.41363	1.63724e-05	8.34783e-05	UP		weakly similar to DEHA-IPF1537.1 Debaryomyces hansenii unknown function,start by similarity					N terminus of Rad21 / Rec8 like protein
YALI0B06688g	42.167	5.39804	9.28754e-12	1.25273e-10	UP		no similarity, hypothetical start
YALI0C22836g	40.3401	5.33414	3.69333e-44	4.78852e-42	UP		some similarities with uniprot|Q8TFK5 Yarrowia lipolytica Cell wall protein, hypothetical start					Yeast PIR protein repeat
YALI0D02343g	40.2366	5.33044	8.81488e-13	1.33336e-11	UP		some similarities with uniprot|Q12324 Saccharomyces cerevisiae YOR088W/YOR0887 possible calcium influx channel	YOR087W	YVC1	Vacuolar cation channel, mediates release of Ca(2+) from the vacuole in response to hyperosmotic shock	SIMILAR TO
YALI0A19932g	39.0665	5.28786	3.80318e-11	4.7656e-10	UP		no similarity, hypothetical start
YALI0C03443g	38.5139	5.26731	8.58653e-14	1.41689e-12	UP		weakly similar to uniprot|Q89C37 Bradyrhizobium japonicum Blr7961 protein, hypothetical start					Hsp20/alpha crystallin family
YALI0F28171g	38.0641	5.25036	2.56763e-05	0.000125381	UP		no similarity, possibly noncoding, hypothetical start					F-box-like
YALI0C14696g	37.9267	5.24514	9.45493e-06	5.08644e-05	UP		no similarity, hypothetical start
YALI0F22561g	37.2059	5.21746	4.03246e-54	8.5394e-52	UP		no similarity, hypothetical start					Ring finger domain
YALI0D15928g	36.7628	5.20018	6.35723e-50	1.12187e-47	UP		some similarities with uniprot|P53857 Saccharomyces cerevisiae YNL234w	YNL234W		Protein of unknown function with similarity to globins; has a functional heme-binding domain; transcription is induced by hypoxia and other stress conditions; proposed to be involved in glucose signaling or metabolism; regulated by Rgt1p	SIMILAR TO		orf19.4459	similar to S. cerevisiae Ynl234wp, which is a putative heme-binding stress-related protein; transposon mutation affects filamentous growth
YALI0B23111g	36.4274	5.18695	1.14611e-18	2.97193e-17	UP		similar to uniprot|Q6CH49 Yarrowia lipolytica YALI0A12419g, identified by cDNA
YALI0E20625g	36.3678	5.18459	1.11781e-54	2.63016e-52	UP		some similarities with uniprot|P18562 Saccharomyces cerevisiae YHR128w FUR1 uracil phosphoribosyltransferase	YHR128W	FUR1	Uracil phosphoribosyltransferase, synthesizes UMP from uracil; involved in the pyrimidine salvage pathway	SIMILAR TO
YALI0C23991g	34.9906	5.1289	9.04178e-47	1.30551e-44	UP	RNY1	Ribonuclease T2-like (RNase T2-like) (EC 3.1.27.1)	YPL123C	RNY1	Vacuolar RNase of the T(2) family, relocalizes to the cytosol where it cleaves tRNAs upon oxidative or stationary phase stress; promotes apoptosis under stress conditions and this function is independent of its catalytic activity		Ribonuclease T2 family	RNY11
YALI0C05753g	34.9268	5.12626	2.63338e-58	7.60448e-56	UP		highly similar to DEHA0B09460g Debaryomyces hansenii IPF 9880.1 similarity to mitochondrial phosphate carrier protein	YER053C	PIC2	Mitochondrial phosphate carrier, imports inorganic phosphate into mitochondria; functionally redundant with Mir1p but less abundant than Mir1p under normal conditions; expression is induced at high temperature	SIMILAR TO	Mitochondrial carrier protein
YALI0B17930g	34.8893	5.12471	7.96214e-47	1.17636e-44	UP		similar to uniprot|Q12325 Saccharomyces cerevisiae YLR092w SEL2 sulfate transporter P4.33.f3.1 or uniprot|P38359 Saccharomyces cerevisiae YBR294w SUL1 high- affinity sulfate transport protein P4.33.f3.1	YLR092W	SUL2	High affinity sulfate permease; sulfate uptake is mediated by specific sulfate transporters Sul1p and Sul2p, which control the concentration of endogenous activated sulfate intermediates		Sulfate transporter N-terminal domain with GLY motif Sulfate transporter family STAS domain	SUL2	Protein described as a sulfate transporter; transcription is negatively regulated by Sfu1p; induced upon biofilm formation; amphotericin B induced
YALI0F09009g	34.8414	5.12273	5.68823e-56	1.44549e-53	UP		no similarity, hypothetical start					Septin
YALI0E06105g	33.9016	5.08328	2.21725e-06	1.33645e-05	UP		no similarity, hypothetical start
YALI0F30437g	33.3739	5.06065	2.97437e-18	7.46884e-17	UP		no similarity, hypothetical start
YALI0C06237g	33.0779	5.0478	2.24191e-30	1.41018e-28	UP		weakly similar to uniprot|Q06177 Saccharomyces cerevisiae YLR327c TMA10 (ohnolog of YGR008C) Protein of unknown function that associates with ribosomes, hypothetical start					Hyaluronan / mRNA binding family
YALI0B16148g	32.7894	5.03516	2.66063e-08	2.26582e-07	UP		no similarity, hypothetical start
YALI0C03465g	31.5086	4.97768	4.6155e-15	8.70097e-14	UP		similar to uniprot|P15992 Saccharomyces cerevisiae YBR072w HSP26 heat shock protein, hypothetical start					Hsp20/alpha crystallin family
YALI0A18469g	30.8539	4.94738	1.68615e-17	3.95281e-16	UP	HOY1	Homeobox protein HOY1					Homeobox domain
YALI0C09658g	30.8142	4.94552	1.34588e-17	3.21444e-16	UP		some similarities to uniprot|Q04740 Saccharomyces cerevisiae YMR234w RNH1 ribonuclease H, hypothetical start
YALI0F18744g	29.8885	4.90152	4.84948e-29	2.72644e-27	UP		similar to uniprot|Q05131 Saccharomyces cerevisiae YMR034c and DEHA0E11704g Debaryomyces hansenii IPF 11988.1	YMR034C		Putative transporter, member of the SLC10 carrier family; identified in a transposon mutagenesis screen as a gene involved in azole resistance; YMR034C is not an essential gene	SIMILAR TO	SBF-like CPA transporter family (DUF4137)
YALI0F20548g	29.5784	4.88647	9.15266e-31	5.81468e-29	UP		no similarity, hypothetical start
YALI0A04059g	29.4187	4.87866	7.27741e-16	1.46308e-14	UP		similar to uniprot|Q6CHW7 Yarrowia lipolytica YALI0A03971g, start by similarity
YALI0C09845g	29.3734	4.87644	1.30865e-49	2.24699e-47	UP		weakly similar to uniprot|Q7RY47 Neurospora crassa NCU04516.1 predicted protein, hypothetical start
YALI0B00924g	29.2389	4.86982	1.57583e-17	3.70788e-16	UP		no similarity, hypothetical start					Protein of unknown function (DUF1687)
YALI0C08965g	29.107	4.86329	4.05691e-05	0.000190211	UP		no similarity, hypothetical start
YALI0A20174g	28.8296	4.84948	1.03593e-10	1.25119e-09	UP		no similarity, hypothetical start
YALI0E30679g	28.3292	4.82422	4.15612e-35	3.34226e-33	UP		some similarities with uniprot|Q95TU2 Drosophila melanogaster LD23187p (CG6686-PA), hypothetical start
YALI0A15125g	27.9855	4.80661	9.77712e-51	1.82688e-48	UP		similar to uniprot|P25297 Saccharomyces cerevisiae YML123c PHO84 Inorganic phosphate transporter	YML123C	PHO84	High-affinity inorganic phosphate (Pi) transporter and low-affinity manganese transporter; regulated by Pho4p and Spt7p; mutation confers resistance to arsenate; exit from the ER during maturation requires Pho86p		Sugar (and other) transporter
YALI0B21494g	27.5581	4.78441	3.82244e-12	5.3607e-11	UP		some similarities with ca|CA1652|CaRNH1.exon1 Candida albicans Ribonuclease H, hypothetical start					RNase H
YALI0D04180g	27.4633	4.77943	4.60334e-16	9.49514e-15	UP		weakly similar to uniprot|O74959 Schizosaccharomyces pombe Hypothetical short chain dehydrogenase, hypothetical start					short chain dehydrogenase
YALI0E17941g	27.4513	4.7788	2.57235e-08	2.19948e-07	UP		some similarities with DEHA0E19745g Debaryomyces hansenii, hypothetical start					Rare lipoprotein A (RlpA)-like double-psi beta-barrel	DAG7	mutation confers hypersensitivity to toxic ergosterol analog; a-specific transcription; alpha-factor induced
YALI0D09889g	26.7024	4.7389	1.75849e-54	3.98988e-52	UP		similar to wi|NCU08949.1 Neurospora crassa NCU08949.1 hypothetical protein, hypothetical start					Protein of unknown function (DUF1761)
YALI0F26279g	26.5379	4.72998	3.42297e-19	9.53778e-18	UP		similar to uniprot|Q873I9 Neurospora crassa B9B11.100, hypothetical start					Pirin C-terminal cupin domain Pirin
YALI0E05665g	26.3125	4.71768	6.2876e-36	5.39799e-34	UP		some similarities with uniprot|P43549 Saccharomyces cerevisiae YFL054c	YFL054C		Putative channel-like protein; similar to Fps1p; mediates passive diffusion of glycerol in the presence of ethanol		Major intrinsic protein
YALI0E14993g	25.0409	4.64622	2.66249e-20	8.0932e-19	UP		no similarity, hypothetical start
YALI0D26906g	24.5068	4.61511	2.93809e-49	4.91202e-47	UP		FAS1 domain-containing protein YALI0D26906g	YDR262W		Putative protein of unknown function; green fluorescent protein (GFP)-fusion protein localizes to the vacuole and is induced in response to the DNA-damaging agent MMS; gene expression increases in response to Zymoliase treatment		Fasciclin domain
YALI0E09064g	24.4988	4.61464	5.32168e-16	1.08709e-14	UP		similar to DEHA0F07326g Debaryomyces hansenii IPF 8538.1, hypothetical start					Magnesium transporter NIPA
YALI0D08250g	24.4549	4.61205	1.35819e-16	2.92495e-15	UP		similar to uniprot|Q871N8 Neurospora crassa NCU01449.1 hypothetical protein and to uniprot|Q6YFE5 URC1_SACKL, GTP cyclohydrolase involved in uracile catabolism					GTP cyclohydrolase N terminal GTP cyclohydrolase II
YALI0D27214g	24.1195	4.59213	0.000690195	0.00234538	UP		similar to uniprot|Q8TFK5 Yarrowia lipolytica Cell wall protein, hypothetical start					Yeast PIR protein repeat
YALI0E34221g	23.781	4.57174	4.05475e-22	1.40764e-20	UP		weakly similar to uniprot|O59806 Schizosaccharomyces pombe Hypothetical 28.3 kDa protein, hypothetical start					Acetyltransferase (GNAT) family
YALI0E14256g	23.7182	4.56792	0.000116654	0.000484698	UP		similar to uniprot|P33677 Pichia angusta Formate dehydrogenase (NAD-dependent formate dehydrogenase) (FDH)	YOR388C	FDH1	NAD(+)-dependent formate dehydrogenase, may protect cells from exogenous formate	SIMILAR TO	D-isomer specific 2-hydroxyacid dehydrogenase, NAD binding domain D-isomer specific 2-hydroxyacid dehydrogenase, catalytic domain
YALI0D17512g	23.7174	4.56788	4.11295e-20	1.23837e-18	UP		similar to uniprot|Q6CH08 Yarrowia lipolytica YALI0A14322g, start by similarity					F-box domain
YALI0F02211g	23.6933	4.56641	6.51178e-09	6.07156e-08	UP		some similarities with uniprot|P50166 Candida tropicalis ARD gene coding D-arabinitol 2-dehydrogenase (ribulose forming), hypothetical start					Enoyl-(Acyl carrier protein) reductase	ARD	D-arabitol dehydrogenase, NAD-dependent (ArDH); enzyme of D-arabitol and D-arabinose catabolism; D-arabitol is a marker for active infection in humans; has conserved YXXXK motif of short-chain alcohol-polyol-sugar dehydrogenases
YALI0E07205g	23.4232	4.54986	5.26024e-39	5.14128e-37	UP		similar to uniprot|P32837 Saccharomyces cerevisiae YDL210w UGA4 GABA-specific high-affinity permease	YDL210W	UGA4	Permease that serves as a gamma-aminobutyrate (GABA) transport protein involved in the utilization of GABA as a nitrogen source; catalyzes the transport of putrescine and delta-aminolevulinic acid (ALA); localized to the vacuolar membrane	SIMILAR TO	Amino acid permease
YALI0B18502g	23.1558	4.5333	1.48694e-47	2.24918e-45	UP		weakly similar to uniprot|Q9C0W5 Schizosaccharomyces pombe Hypothetical 17.7 kDa protein, start by similarity					Domain of unknown function (DUF1772)
YALI0A08360g	23.1402	4.53233	4.51837e-05	0.000208462	UP		weakly similar to uniprot|P09230 Yarrowia lipolytica Alkaline extracellular protease precursor (EC 3. 4.21.-) (AEP)	YOR003W	YSP3	Putative precursor to the subtilisin-like protease III	SIMILAR TO	Subtilase family
YALI0E08074g	22.3815	4.48423	0.0107416	0.0261963	UP		some similarities with DEHA0F23397g Debaryomyces hansenii	YOR173W	DCS2	Non-essential, stress induced regulatory protein containing a HIT (histidine triad) motif; modulates m7G-oligoribonucleotide metabolism; inhibits Dcs1p; regulated by Msn2p, Msn4p, and the Ras-cAMP-cAPK signaling pathway, similar to Dcs1p.	SIMILAR TO	Scavenger mRNA decapping enzyme C-term binding
YALI0E26279g	21.7425	4.44244	9.36066e-29	5.03968e-27	UP		similar to uniprot|Q8DLR0 Synechococcus elongatus tll0418 Sulfolipid sulfoquinovosyldiacylglycerol biosynthesis protein, start by similarity					Glycosyl transferases group 1 Glycosyl transferase 4-like domain
YALI0C11033g	21.3772	4.418	4.23983e-14	7.2799e-13	UP		some similarities with uniprot|P53916 Saccharomyces cerevisiae YNL128w TEP1, hypothetical start					Dual specificity phosphatase, catalytic domain	TEP1	Putative protein phosphatase of the PTP family (tyrosine-specific), similar to S. cerevisiae Tep1p
YALI0E04422g	21.3502	4.41618	2.84949e-50	5.17222e-48	UP		similar to uniprot|Q6C5F8 Yarrowia lipolytica YALI0E18458g, hypothetical start
YALI0B08899g	21.2687	4.41066	3.06055e-48	4.86092e-46	UP		weakly similar to DEHA0E16588g Debaryomyces hansenii, hypothetical start					Domain of unknown function (DUF4149)	orf19.4947	Mitochondrial membrane protein of unknown function
YALI0F04081g	20.9715	4.39036	5.16396e-39	5.12604e-37	UP		weakly similar to uniprot|Q08980 Saccharomyces cerevisiae YPL264c	YPL264C		Putative membrane protein of unknown function; physically interacts with Hsp82p; YPL264C is not an essential gene		EamA-like transporter family	orf19.2204
YALI0D17666g	20.8976	4.38527	1.74114e-13	2.7723e-12	UP		weakly similar to uniprot|O08654 Rattus norvegicus UPF0183 protein, start by similarity					Uncharacterised protein family (UPF0183)
YALI0D05863g	20.841	4.38135	1.68789e-34	1.30771e-32	UP		weakly similar to uniprot|Q826P0 Streptomyces avermitilis SAV7142 Hypothetical protein	YDL237W	AIM6	Putative protein of unknown function, required for respiratory growth; YDL237W is not an essential gene			orf19.5925
YALI0B20306g	20.7202	4.37297	7.44537e-20	2.17974e-18	UP		uniprot|Q9C1F8 Yarrowia lipolytica Pir1 covalently- linked cell wall protein	YJL159W	HSP150	O-mannosylated heat shock protein that is secreted and covalently attached to the cell wall via beta-1,3-glucan and disulfide bridges; required for cell wall stability; induced by heat shock, oxidative stress, and nitrogen limitation			PIR1	Structural protein of cell wall; 1,3-beta-glucan-linked; O-glycosylated by Pmt1p; N-mannosylated; tandem repeats; heterozygous mutant has cell wall defects; hyphal repressed; Hog1p, fluconazole, hypoxia induced; iron, Efg1p, Plc1p regulated
YALI0B20768g	20.4408	4.35338	5.012e-15	9.3927e-14	UP		similar to DEHA0A00979g Debaryomyces hansenii IPF 65.1, hypothetical start					Iron/zinc purple acid phosphatase-like protein C Calcineurin-like phosphoesterase
YALI0F11803g	20.4149	4.35155	1.62146e-21	5.39325e-20	UP		uniprot|Q9UR74 and uniprot|Q9URG4 Yarrowia lipolytica similar to uniprot|P00729 Saccharomyces cerevisiae YMR297w PRC1 carboxypeptidase y serine-type protease	YMR297W	PRC1	Vacuolar carboxypeptidase Y (proteinase C; CPY), broad-specificity C-terminal exopeptidase involved in non-specific protein degradation in the vacuole; member of the serine carboxypeptidase family	SIMILAR TO	Serine carboxypeptidase
YALI0C17237g	20.1204	4.33059	7.32829e-46	1.0121e-43	UP		highly similar to uniprot|P19145 Saccharomyces cerevisiae YKR039W General amino-acid permease GAP1	YKR039W	GAP1	General amino acid permease; localization to the plasma membrane is regulated by nitrogen source	SIMILAR TO	Amino acid permease
YALI0E32901g	19.8559	4.31149	1.0299e-07	7.89256e-07	UP		similar to uniprot|P36035 Saccharomyces cerevisiae YKL217W JEN1 Carboxylic acid transporter protein homolog	YKL217W	JEN1	Lactate transporter, required for uptake of lactate and pyruvate; phosphorylated; expression is derepressed by transcriptional activator Cat8p during respiratory growth, and repressed in the presence of glucose, fructose, and mannose	SIMILAR TO	Sugar (and other) transporter	JEN2	Dicarboxylic acid transporter; regulated by glucose repression; induced by Rgt1p; transcription is upregulated in both intermediate and mature biofilms; disruptants not obtained by UAU1 method
YALI0C00319g	19.4609	4.2825	3.30764e-16	6.88965e-15	UP		similar to uniprot|P47137 Saccharomyces cerevisiae Probable oxidoreductase YJR096W	YJR096W		Putative xylose and arabinose reductase; member of the aldo-keto reductase (AKR) family; GFP-fusion protein is induced in response to the DNA-damaging agent MMS		Aldo/keto reductase family	orf19.6816
YALI0E07810g	19.3441	4.27382	6.75479e-45	8.94024e-43	UP		weakly similar to uniprot|Q890E1 Lactobacillus plantarum LP_0082 zinc-binding oxidoreductase, hypothetical start					Zinc-binding dehydrogenase Alcohol dehydrogenase GroES-like domain
YALI0D07898g	19.3281	4.27263	3.04485e-11	3.86107e-10	UP		no similarity, hypothetical start
YALI0E00924g	19.2146	4.26413	3.08243e-09	3.05027e-08	UP		weakly similar to uniprot|P38151 Saccharomyces cerevisiae YBR233w PBP2 PAB1 binding protein, hypothetical start
YALI0F18282g	18.806	4.23312	8.36334e-44	1.06265e-41	UP		similar to uniprot|Q8TFK5 Yarrowia lipolytica Cell wall protein CWP1, start by similarity					Yeast PIR protein repeat Flocculin type 3 repeat
YALI0C23452g	18.5026	4.20965	0.0111119	0.0269443	UP		no similarity, hypothetical start
YALI0D12386g	18.4817	4.20802	2.59684e-43	3.17264e-41	UP		similar to uniprot|P53111 Saccharomyces cerevisiae YGL157w and DEHA0A06347g Debaryomyces hansenii	YGL157W		NADPH-dependent aldehyde reductase, utilizes aromatic and alophatic aldehyde substrates; member of the short-chain dehydrogenase/reductase superfamily	SIMILAR TO	NAD dependent epimerase/dehydratase family
YALI0E05709g	18.3411	4.19701	3.29916e-43	3.95464e-41	UP		weakly similar to DEHA0B16577g Debaryomyces hansenii, hypothetical start					Pyridoxamine 5'-phosphate oxidase
YALI0F03113g	18.0354	4.17276	1.02096e-13	1.65463e-12	UP		some similarities with uniprot|P32581 Saccharomyces cerevisiae YJL106w IME2 ser/thr protein kinase	YJL106W	IME2	Serine/threonine protein kinase involved in activation of meiosis, associates with Ime1p and mediates its stability, activates Ndt80p; IME2 expression is positively regulated by Ime1p		Protein kinase domain
YALI0F08987g	17.5601	4.13423	6.01454e-20	1.77723e-18	UP		no similarity, hypothetical start
YALI0F17160g	17.5583	4.13408	0.0010024	0.0032502	UP		similar to uniprot|Q6CB47 Yarrowia lipolytica YALI0C21978g, start by similarity
YALI0C22000g	17.4792	4.12757	8.72491e-43	9.8981e-41	UP		similar to uniprot|Q04432 Saccharomyces cerevisiae YDR533c	YDR533C	HSP31	Possible chaperone and cysteine protease with similarity to E. coli Hsp31; member of the DJ-1/ThiJ/PfpI superfamily, which includes human DJ-1 involved in Parkinson's disease; exists as a dimer and contains a putative metal-binding site		DJ-1/PfpI family
YALI0A08404g	17.3827	4.11958	1.4609e-07	1.09576e-06	UP		weakly similar to uniprot|Q6CHL4 Yarrowia lipolytica YALI0A07667g, hypothetical start
YALI0F00220g	17.3734	4.11881	2.33524e-42	2.60277e-40	UP		no similarity, hypothetical start					FHA domain
YALI0F08943g	17.2056	4.1048	2.29784e-14	4.04382e-13	UP		no similarity, hypothetical start					RNA recognition motif. (a.k.a. RRM, RBD, or RNP domain)
YALI0C18263g	17.165	4.1014	9.46681e-19	2.50594e-17	UP		no similarity, hypothetical start
YALI0E32035g	17.138	4.09912	1.35703e-27	6.84223e-26	UP		weakly similar to uniprot|P34163 Saccharomyces cerevisiae YKL140w TGL1 triacylglycerol lipase P3.90.f3.1	YKL140W	TGL1	Steryl ester hydrolase, one of three gene products (Yeh1p, Yeh2p, Tgl1p) responsible for steryl ester hydrolase activity and involved in sterol homeostasis; localized to lipid particle membranes		Partial alpha/beta-hydrolase lipase region alpha/beta hydrolase fold	orf19.2050
YALI0E34749g	16.952	4.08339	5.72958e-46	8.0889e-44	UP		Catalase (EC 1.11.1.6)	YGR088W	CTT1	Cytosolic catalase T, has a role in protection from oxidative damage by hydrogen peroxide		Catalase-related immune-responsive Catalase
YALI0E08052g	16.5384	4.04775	4.21339e-07	2.88444e-06	UP		weakly similar to DEHA0E14619g Debaryomyces hansenii, hypothetical start						orf19.664
YALI0E27852g	16.4573	4.04066	1.13282e-18	2.9495e-17	UP		similar to uniprot|P48777 Emericella nidulans UAPC Purine permease, hypothetical start					Permease family	XUT1	Putative high-affinity, high-capacity xanthine-uric acid/H+ symporter; similar to A. nidulans UapA; member of the Nucleobase-Ascorbate Transporter/Nucleobase-Cation Symporter (NAT/NCS2) family
YALI0B00660g	16.441	4.03923	0.0110415	0.0267941	UP		weakly similar to uniprot|Q12151 Saccharomyces cerevisiae YDR213w UPC2 regulatory protein involved in control of sterol uptake, hypothetical start					Zinc-finger double domain	orf19.217
YALI0A19888g	16.4004	4.03566	5.66077e-43	6.65979e-41	UP		similar to CA4004|IPF4256 Candida albicans unknown function, hypothetical start					Glycosyl hydrolase family 76	orf19.1632
YALI0E23192g	16.3614	4.03222	9.06735e-31	5.81468e-29	UP		some similarities with uniprot|A2R678 Aspergillus niger, identified by cDNA					Protein of unknown function (DUF3317)
YALI0E06083g	16.3401	4.03035	1.03134e-37	9.49583e-36	UP		similar to uniprot|P53285 Saccharomyces cerevisiae YGR141w	YGR141W	VPS62	Vacuolar protein sorting (VPS) protein required for cytoplasm to vacuole targeting of proteins		Plant protein of unknown function (DUF946)	orf19.1800
YALI0E18986g	16.3275	4.02923	3.1966e-07	2.268e-06	UP		highly similar to uniprot|P04838 Saccharomyces cerevisiae YLL039c UBI4 ubiquitin	YLL039C	UBI4	Ubiquitin, becomes conjugated to proteins, marking them for selective degradation via the ubiquitin-26S proteasome system; essential for the cellular stress response; encoded as a polyubiquitin precursor comprised of 5 head-to-tail repeats		Ubiquitin family	UBI4	Ubiquitin precursor (polyubiquitin), contains three tandem repeats of the ubiquitin peptide that are processed to individual units; transcription is induced by stress; mRNA found in yeast-form and mycelial cells at similar abundance
YALI0C21978g	16.2037	4.01825	3.808e-09	3.71616e-08	UP		similar to uniprot|Q6C1D9 Yarrowia lipolytica YALI0F17160g, start by similarity
YALI0D21890g	16.2032	4.01821	2.41826e-34	1.82895e-32	UP		similar to uniprot|P22855 Saccharomyces cerevisiae YGL156w AMS1 alpha-mannosidase singleton	YGL156W	AMS1	Vacuolar alpha mannosidase, involved in free oligosaccharide (fOS) degradation; delivered to the vacuole in a novel pathway separate from the secretory pathway		Glycosyl hydrolases family 38 N-terminal domain Glycosyl hydrolases family 38 C-terminal domain Alpha mannosidase, middle domain	AMS1	Putative alpha-mannosidase; transcription is regulated by Nrg1p; induced during cell wall regeneration
YALI0F29909g	16.1694	4.01519	2.26362e-43	2.81976e-41	UP		weakly similar to uniprot|Q03104 Saccharomyces cerevisiae YML128c GIN3 unknown function	YML128C	MSC1	Protein of unknown function; mutant is defective in directing meiotic recombination events to homologous chromatids; the authentic, non-tagged protein is detected in highly purified mitochondria and is phosphorylated		Putative stress-responsive nuclear envelope protein
YALI0C06710g	16.1048	4.00942	1.76689e-22	6.35093e-21	UP		no similarity, hypothetical start
YALI0E22286g	16.0367	4.00331	5.00118e-06	2.83177e-05	UP		highly similar to uniprot|P78977 Yarrowia lipolytica Cell wall protein precursor YlCWP1 (strain cx39-74a), start by similarity
YALI0D03465g	15.8763	3.9888	4.32124e-08	3.53319e-07	UP	PHO2	Acid phosphatase (EC 3.1.3.2)					Survival protein SurE
YALI0D02695g	15.8737	3.98857	2.49837e-12	3.57481e-11	UP		no similarity, hypothetical start
YALI0A08558g	15.8189	3.98358	5.88077e-05	0.000263288	UP		no similarity, hypothetical start
YALI0F09075g	15.6147	3.96483	2.21996e-22	7.92326e-21	UP		similar to uniprot|P53111 Saccharomyces cerevisiae YGL157w and DEHA0A06347g Debaryomyces hansenii	YGL157W		NADPH-dependent aldehyde reductase, utilizes aromatic and alophatic aldehyde substrates; member of the short-chain dehydrogenase/reductase superfamily	SIMILAR TO	NAD dependent epimerase/dehydratase family
YALI0B10109g	15.5713	3.96082	0.0118655	0.0284888	UP		no similarity, hypothetical start
YALI0B20790g	15.3944	3.94433	9.3147e-23	3.4606e-21	UP		no similarity, hypothetical start
YALI0F20834g	15.1841	3.92449	1.92148e-27	9.53685e-26	UP		weakly similar to uniprot|P87119 Schizosaccharomyces pombe Zinc finger, C3HC4 type, putative transcription factor, hypothetical start					Ring finger domain	orf19.3425
YALI0C07656g	15.1307	3.91941	9.56903e-39	9.21091e-37	UP		weakly similar to DEHA0D03410g Debaryomyces hansenii, start by similarity					Domain of unknown function (DUF4336)	orf19.2165	induced by nitric oxide
YALI0B12430g	15.1219	3.91856	1.85597e-38	1.75985e-36	UP		weakly similar to uniprot|P07834 Saccharomyces cerevisiae YFL009w CDC4 cell division control protein	YKR036C	CAF4	WD40 repeat-containing protein associated with the CCR4-NOT complex, interacts in a Ccr4p-dependent manner with Ssn2p; also interacts with Fis1p, Mdv1p and Dnm1p and plays a role in mitochondrial fission	SIMILAR TO	WD domain, G-beta repeat
YALI0E20801g	15.0489	3.91159	1.00321e-11	1.3446e-10	UP		similar to uniprot|Q6C426 Yarrowia lipolytica YALI0E30327g, hypothetical start					Domain of unknown function (DUF1772)
YALI0E28548g	15.0447	3.91118	0.000491112	0.00172378	UP		weakly similar to uniprot|Q6C4A1 Yarrowia lipolytica YALI0E28534g, start by similarity
YALI0D09339g	14.9907	3.906	2.92252e-07	2.07915e-06	UP		weakly similar to uniprot|O74251 Emericella nidulans Medusa transcriptional regulator, hypothetical start						orf19.3156	transcriptionally activated by Mnl1p under weak acid stress
YALI0E18788g	14.8364	3.89107	1.35137e-09	1.40742e-08	UP		uniprot|Q8TFK5 Yarrowia lipolytica Cell wall protein, identified start
YALI0A03817g	14.8026	3.88778	1.69943e-17	3.9693e-16	UP		weakly similar to CA5921|IPF8930 Candida albicans unknown function, hypothetical start
YALI0E17677g	14.7676	3.88436	1.50296e-41	1.59138e-39	UP		similar to uniprot|Q03419 Saccharomyces cerevisiae YDR492w or uniprot|Q12442 Saccharomyces cerevisiae YOL002C	YDR492W	IZH1	Membrane protein involved in zinc ion homeostasis, member of the four-protein IZH family; transcription is regulated directly by Zap1p, expression induced by zinc deficiency and fatty acids; deletion increases sensitivity to elevated zinc		Haemolysin-III related	orf19.55
YALI0F21285g	14.6729	3.87508	0.00155492	0.00479768	UP		no similarity, hypothetical start
YALI0E30327g	14.6282	3.87068	9.05699e-32	6.187e-30	UP		weakly similar to uniprot|Q9C0W5 Schizosaccharomyces pombe SPBC800.14C Hypothetical 17.7 kDa protein, hypothetical start					Domain of unknown function (DUF1772)
YALI0E12463g	14.5739	3.86532	4.26298e-41	4.43979e-39	UP		similar to uniprot|O74230 Candida sp.HA167 XDH Xylitol dehydrogenase	YJR159W	SOR1	Sorbitol dehydrogenase; expression is induced in the presence of sorbitol or xylose		Zinc-binding dehydrogenase Alcohol dehydrogenase GroES-like domain
YALI0D07656g	14.5606	3.86399	5.13428e-36	4.46823e-34	UP		no similarity, hypothetical start
YALI0F17820g	14.4979	3.85778	3.36386e-42	3.68459e-40	UP		Glutamate dehydrogenase	YAL062W	GDH3	NADP(+)-dependent glutamate dehydrogenase, synthesizes glutamate from ammonia and alpha-ketoglutarate; rate of alpha-ketoglutarate utilization differs from Gdh1p; expression regulated by nitrogen and carbon sources		Glutamate/Leucine/Phenylalanine/Valine dehydrogenase Glu/Leu/Phe/Val dehydrogenase, dimerisation domain	GDH3	NADP-glutamate dehydrogenase; hyphal downregulated expression; transcription is regulated by Nrg1p, Plc1p; downregulated by Efg1p; upregulated by Rim101p at pH 8; ciclopirox olamine and ketoconazole induced; transcript repressed by hypoxia
YALI0F17182g	14.472	3.85519	1.21159e-39	1.24149e-37	UP		weakly similar to uniprot|Q8KCX2 Chlorobium tepidum Hypothetical protein CT1285, start by similarity					Polyketide cyclase / dehydrase and lipid transport
YALI0E33297g	14.437	3.8517	6.14418e-22	2.12141e-20	UP		similar to uniprot|Q873I9 Neurospora crassa, related to pirin, hypothetical start					Pirin C-terminal cupin domain Pirin
YALI0F07194g	14.2989	3.83784	2.93824e-09	2.92581e-08	UP		no similarity, hypothetical start
YALI0E00110g	14.0565	3.81316	8.95593e-25	3.76802e-23	UP		similar to uniprot|P08540|PHOX_KLULA Kluyveromyces lactis KLLA0B14839g Potential acid phosphatase, hypothetical start					Phosphoesterase family
YALI0F21659g	13.9702	3.80428	2.3716e-38	2.21571e-36	UP		similar to uniprot|Q12436 Saccharomyces cerevisiae ORF YLR130C	YLR130C	ZRT2	Low-affinity zinc transporter of the plasma membrane; transcription is induced under low-zinc conditions by the Zap1p transcription factor		ZIP Zinc transporter	ZRT2	Putative zinc transporter; ciclopirox olamine, fluconazole, and alkaline downregulated; transcriptionally induced by interaction with macrophages; amphotericin B induced; possibly an essential gene, disruptants not obtained by UAU1 method
YALI0D14674g	13.8917	3.79615	7.20347e-05	0.000314743	UP		weakly similar to uniprot|O74959 Schizosaccharomyces pombe Hypothetical short chain dehydrogenase, start by similarity					short chain dehydrogenase
YALI0B02420g	13.8612	3.79298	4.15867e-24	1.66164e-22	UP		weakly similar to uniprot|P36156 Saccharomyces cerevisiae YKR076w ECM4 involved in cell wall biogenesis and architecture	YKR076W	ECM4	Omega class glutathione transferase; not essential; similar to Ygr154cp; green fluorescent protein (GFP)-fusion protein localizes to the cytoplasm	SIMILAR TO	Glutathione S-transferase, N-terminal domain Glutathione S-transferase, C-terminal domain
YALI0B17160g	13.7827	3.78479	0.00501313	0.0135008	UP		some similarities to uniprot|P38236 Saccharomyces cerevisiae YBR057c MUM2 meiotic protein, hypothetical start
YALI0F03498g	13.7121	3.77737	7.17552e-33	5.06512e-31	UP		similar to uniprot|P50276 Saccharomyces cerevisiae YGR055w MUP1 high affinity methionine permease	YGR055W	MUP1	High affinity methionine permease, integral membrane protein with 13 putative membrane-spanning regions; also involved in cysteine uptake	SIMILAR TO	Amino acid permease
YALI0E11517g	13.5657	3.7619	2.43111e-16	5.11418e-15	UP		weakly similar to uniprot|Q8TFK5 Yarrowia lipolytica CWP1 Cell wall protein, start by similarity					Flocculin type 3 repeat
YALI0B22198g	13.549	3.76012	7.35638e-30	4.45096e-28	UP		some similarities with uniprot|P53438 Saccharomyces cerevisiae YMR016c SOK2 regulatory protein in the PKA signal transduction pathway, hypothetical start
YALI0A06721g	13.5054	3.75547	0.0154883	0.036109	UP		no similarity, hypothetical start
YALI0C03806g	13.3672	3.74062	2.49003e-05	0.000122061	UP		no similarity, hypothetical start
YALI0E27896g	13.2378	3.72659	1.76877e-36	1.56069e-34	UP		no similarity, hypothetical start					Acetyltransferase (GNAT) family
YALI0E20779g	13.1485	3.71683	9.27048e-09	8.37772e-08	UP		no similarity, hypothetical start
YALI0F06578g	12.9924	3.6996	8.69853e-12	1.18334e-10	UP		O-acyltransferase	YNR019W	ARE2	Acyl-CoA:sterol acyltransferase, isozyme of Are1p; endoplasmic reticulum enzyme that contributes the major sterol esterification activity in the presence of oxygen		MBOAT, membrane-bound O-acyltransferase family	ARE2	Acyl CoA:sterol acyltransferase (ASAT); uses cholesterol and oleoyl-CoA substrates; protoberberine derivative drug inhibits enzyme activity; 7 putative transmembrane regions; ketoconazole-induced
YALI0A09559g	12.944	3.69421	1.58433e-34	1.24262e-32	UP		no similarity, hypothetical start
YALI0E14487g	12.8852	3.68764	6.93559e-17	1.52992e-15	UP		weakly similar to uniprot|Q7S3S1 Neurospora crassa NCU04946.1 predicted protein, hypothetical start
YALI0D21098g	12.8685	3.68578	3.18821e-05	0.000152406	UP		similar to CA5045|IPF4510 Candida albicans	YLL057C	JLP1	Fe(II)-dependent sulfonate/alpha-ketoglutarate dioxygenase, involved in sulfonate catabolism for use as a sulfur source; contains sequence that resembles a J domain (typified by the E. coli DnaJ protein); induced by sulphur starvation	SIMILAR TO	Taurine catabolism dioxygenase TauD, TfdA family	orf19.355
YALI0F22187g	12.8586	3.68466	2.18032e-07	1.57943e-06	UP		some similarities with uniprot|Q7S1U2 Neurospora crassa NCU09057.1 hypothetical protein, hypothetical start
YALI0B08690g	12.8566	3.68444	3.01512e-32	2.08207e-30	UP		no similarity, hypothetical start
YALI0E07051g	12.6891	3.66552	1.19835e-37	1.08759e-35	UP		similar to DEHA0E05104g Debaryomyces hansenii, similarity to kynurenine aminotransferase and glutamine-phenylpyruvate transaminase, hypothetical start					Aminotransferase class I and II
YALI0F24167g	12.6666	3.66296	2.93845e-39	2.96317e-37	UP		weakly similar to uniprot|P09937 Saccharomyces cerevisiae YOR313c SPS4 sporulation-specific protein	YOR313C	SPS4	Protein whose expression is induced during sporulation; not required for sporulation; heterologous expression in E. coli induces the SOS response that senses DNA damage
YALI0F30591g	12.6329	3.65911	0.0167581	0.0385879	UP		weakly similar to uniprot|P24552 Fusarium solani D-amino acid oxidase, start by similarity					FAD dependent oxidoreductase
YALI0E34045g	12.5995	3.65529	2.06188e-27	1.01544e-25	UP		similar to uniprot|Q8X8M5 Escherichia coli Orf, hypothetical protein, hypothetical start					Alpha/beta hydrolase family
YALI0C15466g	12.553	3.64996	5.35909e-33	3.82543e-31	UP		no similarity, hypothetical start
YALI0D18964g	12.4782	3.64134	3.11179e-30	1.93816e-28	UP		similar to uniprot|P87218 Candida albicans Sorbitol utilization protein SOU2	YKR009C	FOX2	Multifunctional enzyme of the peroxisomal fatty acid beta-oxidation pathway; has 3-hydroxyacyl-CoA dehydrogenase and enoyl-CoA hydratase activities	SIMILAR TO	short chain dehydrogenase
YALI0F25575g	12.3772	3.62961	7.16286e-07	4.701e-06	UP		similar to uniprot|Q8NJZ8 Emericella nidulans theta class glutathione S-transferase	YNL229C	URE2	Nitrogen catabolite repression transcriptional regulator that acts by inhibition of GLN3 transcription in good nitrogen source; has glutathione peroxidase activity and can mutate to acquire GST activity; altered form creates [URE3] prion	SIMILAR TO	Glutathione S-transferase, N-terminal domain Glutathione S-transferase, C-terminal domain	GST2	Increased transcription is observed upon benomyl treatment transcription and in populations of cells exposed to fluconazole over multiple generations; regulated by Nrg1p, Tup1p; induced by nitric oxide
YALI0B21582g	12.2803	3.61827	5.85684e-08	4.64526e-07	UP		uniprot|Q9Y791 Yarrowia lipolytica C2H2-type zinc finger protein Mhy1p required for dimorphic transition	YER130C	MHY1	C2H2-type zinc finger protein Mhy1p required for dimorphic transition		Zinc-finger double domain C2H2-type zinc finger
YALI0B16192g	12.2126	3.6103	1.94714e-19	5.57216e-18	UP		similar to uniprot|P87219 Candida albicans Sorbitol utilization protein SOU1 or uniprot|P87218 Candida albicans Sorbitol utilization protein SOU2	YNL202W	SPS19	Peroxisomal 2,4-dienoyl-CoA reductase, auxiliary enzyme of fatty acid beta-oxidation; homodimeric enzyme required for growth and sporulation on petroselineate medium; expression induced during late sporulation and in the presence of oleate	SIMILAR TO	Enoyl-(Acyl carrier protein) reductase	SOU2	Protein similar to Sou1p; not required for utilization of L-sorbose
YALI0E14509g	12.1118	3.59834	3.236e-14	5.64788e-13	UP		similar to DEHA0C00902g Debaryomyces hansenii, start by similarity					Cytochrome P450	orf19.3105	Putative cytochrome P450 protein; possibly an essential gene, disruptants not obtained by UAU1 method
YALI0D01694g	12.0001	3.58497	1.06369e-07	8.13191e-07	UP		similar to uniprot|P32573 Saccharomyces cerevisiae YNL202w SPS19 peroxisomal 2 4-dienoyl-CoA reductase	YNL202W	SPS19	Peroxisomal 2,4-dienoyl-CoA reductase, auxiliary enzyme of fatty acid beta-oxidation; homodimeric enzyme required for growth and sporulation on petroselineate medium; expression induced during late sporulation and in the presence of oleate	SIMILAR TO	Enoyl-(Acyl carrier protein) reductase
YALI0A09856g	11.9539	3.5794	6.43929e-37	5.7618e-35	UP		similar to uniprot|P49095 Saccharomyces cerevisiae YMR189w GSD2 glycine decarboxylase P subunit	YMR189W	GCV2	P subunit of the mitochondrial glycine decarboxylase complex, required for the catabolism of glycine to 5,10-methylene-THF; expression is regulated by levels of 5,10-methylene-THF in the cytoplasm		Glycine cleavage system P-protein	GCV2	Putative protein of glycine catabolism; downregulated by Efg1p; Hog1p-induced; upregulated by Rim101p at acid pH; transcription is activated in the presence of elevated CO2; protein detected by mass spec in stationary phase cultures
YALI0D00495g	11.9007	3.57297	0.00120121	0.00381756	UP		similar to uniprot|P32837 Saccharomyces cerevisiae YDL210w UGA4 GABA-specific high-affinity permease	YDL210W	UGA4	Permease that serves as a gamma-aminobutyrate (GABA) transport protein involved in the utilization of GABA as a nitrogen source; catalyzes the transport of putrescine and delta-aminolevulinic acid (ALA); localized to the vacuolar membrane	SIMILAR TO	Amino acid permease
YALI0D19646g	11.8769	3.57009	0.015623	0.0363564	UP		similar to uniprot|P50276 Saccharomyces cerevisiae YGR055W High-affinity methionine permease	YGR055W	MUP1	High affinity methionine permease, integral membrane protein with 13 putative membrane-spanning regions; also involved in cysteine uptake	SIMILAR TO	Amino acid permease
YALI0E19426g	11.8721	3.56951	9.71015e-10	1.03678e-08	UP		weakly similar to uniprot|Q96UH1 Cryptococcus neoformans CIG Cytokine inducing-glycoprotein, hypothetical start
YALI0D02046g	11.8181	3.56292	7.09042e-14	1.18349e-12	UP		weakly similar to uniprot|Q06328 Saccharomyces cerevisiae YDR352w	YDR352W		Putative protein of unknown function	SIMILAR TO	PQ loop repeat	orf19.6950	Protein not essential for viability
YALI0A17281g	11.7995	3.56065	1.95058e-12	2.83571e-11	UP		similar to uniprot|Q8X8M5 Escherichia coli Orf, hypothetical protein, hypothetical start					Alpha/beta hydrolase family
YALI0A17831g	11.7541	3.55509	2.56687e-08	2.19775e-07	UP		no similarity, hypothetical start					Glycine zipper 2TM domain
YALI0F02849g	11.714	3.55017	8.07802e-34	5.9674e-32	UP		Aminomethyltransferase (EC 2.1.2.10)	YDR019C	GCV1	T subunit of the mitochondrial glycine decarboxylase complex, required for the catabolism of glycine to 5,10-methylene-THF; expression is regulated by levels of levels of 5,10-methylene-THF in the cytoplasm		Glycine cleavage T-protein C-terminal barrel domain Aminomethyltransferase folate-binding domain	GCV1	Protein described as T subunit of glycine decarboxylase; transcription is negatively regulated by Sfu1p
YALI0D02167g	11.7026	3.54876	1.47301e-31	9.74795e-30	UP		some similarities with uniprot|P38113 Saccharomyces cerevisiae YBR145w ADH5 alcohol dehydrogenase V	YBR145W	ADH5	Alcohol dehydrogenase isoenzyme V; involved in ethanol production	SIMILAR TO	Zinc-binding dehydrogenase Alcohol dehydrogenase GroES-like domain
YALI0E24651g	11.6982	3.54822	5.83781e-10	6.45001e-09	UP		Pheromone-regulated membrane protein 10	YJL108C	PRM10	Pheromone-regulated protein, proposed to be involved in mating; predicted to have 5 transmembrane segments; induced by treatment with 8-methoxypsoralen and UVA irradiation		Protein of unknown function (DUF3815) Protein of unknown function (DUF1212)	orf19.6527	shows colony morphology-related gene regulation by Ssn6p; transcriptionally activated by Mnl1p under weak acid stress; possibly an essential gene, disruptants not obtained by UAU1 method
YALI0B19998g	11.6411	3.54116	1.71502e-31	1.12325e-29	UP		similar to uniprot|Q12680 Saccharomyces cerevisiae YDL171c GLT1 glutamate synthase (NAPDPH) (GOGAT	YDL171C	GLT1	NAD(+)-dependent glutamate synthase (GOGAT), synthesizes glutamate from glutamine and alpha-ketoglutarate; with Gln1p, forms the secondary pathway for glutamate biosynthesis from ammonia; expression regulated by nitrogen source		Pyridine nucleotide-disulphide oxidoreductase GXGXG motif Glutamine amidotransferases class-II Glutamate synthase central domain Conserved region in glutamate synthase	GLT1	Putative glutamate synthase; alkaline downregulated; transcription is downregulated in both intermediate and mature biofilms
YALI0B21406g	11.508	3.52457	1.58387e-15	3.13468e-14	UP		similar to DEHA0F08206g Debaryomyces hansenii IPF 8485.1	YFL009W	CDC4	F-box protein required for G1/S and G2/M transition, associates with Skp1p and Cdc53p to form a complex, SCFCdc4, which acts as ubiquitin-protein ligase directing ubiquitination of the phosphorylated CDK inhibitor Sic1p	SIMILAR TO	WD domain, G-beta repeat
YALI0B16214g	11.3927	3.51004	1.19147e-20	3.69239e-19	UP		similar to uniprot|P25379 Saccharomyces cerevisiae YCL064c CHA1 L-serine/L-threonine deaminase P3.118.f2.1	YCL064C	CHA1	Catabolic L-serine (L-threonine) deaminase, catalyzes the degradation of both L-serine and L-threonine; required to use serine or threonine as the sole nitrogen source, transcriptionally induced by serine and threonine	SIMILAR TO	Pyridoxal-phosphate dependent enzyme
YALI0D20526g	11.3523	3.50492	3.62301e-35	2.95089e-33	UP		weakly similar to uniprot|P22943 Saccharomyces cerevisiae YFL014W HSP12 Plasma membrane localized protein that protects membranes from desiccation, hypothetical start					Heat shock protein 9/12
YALI0B21780g	11.3203	3.50084	5.64938e-07	3.77398e-06	UP		similar to uniprot|P14065 Saccharomyces cerevisiae YOR120w GCY1 galactose-induced protein of aldo/keto reductase family	YOR120W	GCY1	Putative NADP(+) coupled glycerol dehydrogenase, proposed to be involved in an alternative pathway for glycerol catabolism; member of the aldo-keto reductase (AKR) family	SIMILAR TO	Aldo/keto reductase family
YALI0E31845g	11.2932	3.49738	3.46683e-22	1.21015e-20	UP		weakly similar to uniprot|Q7SH63 Neurospora crassa NCU02666.1	YNL027W	CRZ1	Transcription factor that activates transcription of genes involved in stress response; nuclear localization is positively regulated by calcineurin-mediated dephosphorylation	SIMILAR TO	Zinc-finger double domain Zinc finger, C2H2 type	orf19.4972	Putative transcription factor with zinc finger DNA-binding motif
YALI0F25729g	11.1241	3.47561	2.80147e-35	2.34181e-33	UP		weakly similar to uniprot|Q04740 Saccharomyces cerevisiae YMR234w RNH1 ribonuclease H, hypothetical start					RNase H
YALI0E31757g	11.0697	3.46854	1.11346e-05	5.88992e-05	UP		weakly similar to uniprot|Q8X0W7 Neurospora crassa 123A4.250 Related to NsdD protein, hypothetical start					GATA zinc finger	BRG1	Putative DNA-binding transcription factor; similar to S. cerevisiae Gat2p; transposon mutation affects filamentous growth
YALI0D17402g	10.9703	3.45553	5.76677e-29	3.18577e-27	UP		similar to uniprot|Q86ZL4 Podospora anserina putative cystathionine gamma-synthase	YLL058W		Putative protein of unknown function with similarity to Str2p, which is a cystathionine gamma-synthase important in sulfur metabolism; YLL058W is not an essential gene		Cys/Met metabolism PLP-dependent enzyme	STR2	Protein not essential for viability; similar to S. cerevisiae Str2p, which is cystathionine gamma-synthase involved in sulfur metabolism
YALI0F04620g	10.8864	3.44445	1.5116e-29	8.97492e-28	UP		similar to uniprot|Q6CCX8 Yarrowia lipolytica YALI0C05687g, start by similarity
YALI0C21450g	10.8839	3.44412	6.49003e-35	5.1539e-33	UP		similar to uniprot|P47085 Saccharomyces cerevisiae YJR008w	YJR008W		Putative protein of unknown function; expression repressed by inosine and choline in an Opi1p-dependent manner; expression induced by mild heat-stress on a non-fermentable carbon source.		Memo-like protein	orf19.7210
YALI0D22110g	10.8735	3.44275	6.32636e-23	2.40667e-21	UP		weakly similar to uniprot|O59805 Schizosaccharomyces pombe Acetamidase	YDR242W	AMD2	Putative amidase	SIMILAR TO	Amidase
YALI0D10131g	10.7776	3.42997	3.31185e-34	2.47532e-32	UP		similar to uniprot|P06169 Saccharomyces cerevisiae YLR044c PDC1 pyruvate decarboxylase isozyme 1 P7.9.f5.1	YLR044C	PDC1	Major of three pyruvate decarboxylase isozymes, key enzyme in alcoholic fermentation, decarboxylates pyruvate to acetaldehyde; subject to glucose-, ethanol-, and autoregulation; involved in amino acid catabolism		Thiamine pyrophosphate enzyme, N-terminal TPP binding domain Thiamine pyrophosphate enzyme, central domain Thiamine pyrophosphate enzyme, C-terminal TPP binding domain	PDC11	Protein similar to pyruvate decarboxylase; antigenic; at hyphal cell surface, not yeast-form cells; soluble in hyphae; regulated by Gcn4p, Efg1p, Efh1p; fluconazole-, farnesol-, biofilm-induced; repressed upon amino acid starvation
YALI0E07381g	10.7166	3.42178	1.7387e-09	1.77303e-08	UP		similar to uniprot|O74916 Schizosaccharomyces pombe Putative acetylornithine deacetylase, hypothetical start					Peptidase family M20/M25/M40
YALI0F30789g	10.6567	3.41368	3.84966e-17	8.7346e-16	UP		no similarity, hypothetical start
YALI0B18986g	10.6396	3.41137	7.44704e-18	1.81966e-16	UP		similar to uniprot|Q9C101 Schizosaccharomyces pombe Putative membrane transporter, start by similarity					Major Facilitator Superfamily
YALI0E27115g	10.552	3.39945	2.52857e-11	3.23219e-10	UP		similar to AN8389,2 Aspergillus nidulans hypothetical protein, hypothetical start					Histidine phosphatase superfamily (branch 2)
YALI0D04268g	10.5401	3.39781	9.64918e-34	6.96605e-32	UP		Putative cytochrome c peroxidase, mitochondrial (CCP) (EC 1.11.1.5)	YKR066C	CCP1	Mitochondrial cytochrome-c peroxidase; degrades reactive oxygen species in mitochondria, involved in the response to oxidative stress	SIMILAR TO	Peroxidase	orf19.584
YALI0C16929g	10.5109	3.39382	5.57981e-26	2.51408e-24	UP		similar to uniprot|Q96X51 Pholiota nameko and uniprot|O94342 Schizosaccharomyces pombe Metabolite transport protein	YCR098C	GIT1	Plasma membrane permease, mediates uptake of glycerophosphoinositol and glycerophosphocholine as sources of the nutrients inositol and phosphate; expression and transport rate are regulated by phosphate and inositol availability	SIMILAR TO	Sugar (and other) transporter	GIT4	Putative glycerophosphoinositol permease; fungal-specific (no human or murine homolog); possibly an essential gene, disruptants not obtained by UAU1 method
YALI0E07964g	10.4579	3.38652	1.36598e-09	1.4203e-08	UP		no similarity, possibly noncoding, hypothetical start
YALI0D04510g	10.378	3.37545	2.94634e-22	1.03415e-20	UP		no similarity, hypothetical start
YALI0E03300g	10.3564	3.37245	0.0038106	0.0105807	UP		weakly similar to uniprot|Q6CG00 Yarrowia lipolytica YALI0B02112g, start by similarity
YALI0A16841g	10.194	3.34965	3.03577e-06	1.78082e-05	UP		weakly similar to uniprot|P41696 Saccharomyces cerevisiae YOR113w AZF1 asparagine-rich zinc finger protein	YOR113W	AZF1	Zinc-finger transcription factor, involved in induction of CLN3 transcription in response to glucose; genetic and physical interactions indicate a possible role in mitochondrial transcription or genome maintenance		Zinc-finger double domain Zinc finger, C2H2 type
YALI0F04169g	10.1497	3.34337	2.28244e-13	3.60705e-12	UP		Phosphorylase (EC 2.4.1.1)	YPR160W	GPH1	Non-essential glycogen phosphorylase required for the mobilization of glycogen, activity is regulated by cyclic AMP-mediated phosphorylation, expression is regulated by stress-response elements and by the HOG MAP kinase pathway		Carbohydrate phosphorylase	GPH1	Putative glycogen phosphorylase; gene regulated by Ssk1p, Mig1p, and Tup1p; fluconazole-induced; localizes to cell surface of hyphal cells, but not yeast-form cells; S. cerevisiae Gph1p is a stress-regulated protein of glycogen metabolism
YALI0D15466g	10.1278	3.34025	8.14734e-17	1.78483e-15	UP		no similarity, hypothetical start
YALI0B17050g	10.1016	3.33652	6.96937e-10	7.60763e-09	UP		weakly similar to uniprot|Q947G8 Lycopersicon esculentum GOLS-1 Galactinol synthase (EC 2.4.1.123), hypothetical start					Glycosyl transferase family 8
YALI0C04587g	10.0878	3.33454	2.75827e-16	5.76423e-15	UP		similar to uniprot|Q10156 Schizosaccharomyces pombe Protein kinase lkh1 (EC 2.7.1.37) (EC 2.7.1.112)	YLL019C	KNS1	Nonessential putative protein kinase of unknown cellular role; member of the LAMMER family of protein kinases, which are serine/threonine kinases also capable of phosphorylating tyrosine residues		Protein kinase domain	KNS1	Protein not essential for viability; similar to S. cerevisiae Kns1p, which is a protein kinase
YALI0B19228g	10.024	3.32539	0.00035109	0.0012731	UP		no similarity, hypothetical start					Galactose oxidase, central domain BTB/POZ domain
YALI0B05258g	9.90766	3.30855	3.92088e-29	2.24408e-27	UP		similar to uniprot|P47161 Saccharomyces cerevisiae YJR126C Hypothetical 92.0 kDa protein in RPS5-ZMS1 intergenic region	YJR126C	VPS70	Protein of unknown function involved in vacuolar protein sorting		Transferrin receptor-like dimerisation domain Peptidase family M28 PA domain	VPS70
YALI0B23100g	9.82109	3.29588	9.40227e-32	6.35453e-30	UP		weakly similar to DEHA0E01430g Debaryomyces hansenii IPF 5716.1, hypothetical start					Dihydrodipicolinate synthetase family
YALI0A07425g	9.81008	3.29426	0.0164852	0.0380562	UP		weakly similar to uniprot|Q9I3H5 Pseudomonas aeruginosa Probable flavin-containing monooxygenase, start by similarity					Pyridine nucleotide-disulphide oxidoreductase
YALI0B21318g	9.78768	3.29097	4.14409e-10	4.6351e-09	UP		similar to uniprot|Q6CHS1 Yarrowia lipolytica YALI0A05665g, start by similarity
YALI0C04455g	9.74695	3.28495	4.9427e-11	6.14501e-10	UP		weakly similar to uniprot|P53747 Saccharomyces cerevisiae YNR061C Putative protein of unknown function, start by similarity					Membrane-associating domain
YALI0E05731g	9.68339	3.27551	0.00879965	0.0219663	UP		weakly similar to DEHA-IPF3451.1 Debaryomyces hansenii DEHA0C16368g, putative oxydo-reductase, start by similarity					short chain dehydrogenase
YALI0B12760g	9.67948	3.27493	2.87928e-08	2.426e-07	UP		no similarity, hypothetical start					Cytochrome b5-like Heme/Steroid binding domain
YALI0C23859g	9.63654	3.26851	6.43243e-27	3.07257e-25	UP	POX5	Acyl-coenzyme A oxidase	YGL205W	POX1	Fatty-acyl coenzyme A oxidase, involved in the fatty acid beta-oxidation pathway; localized to the peroxisomal matrix	SIMILAR TO	Acyl-CoA oxidase Acyl-CoA dehydrogenase, middle domain Acyl-CoA dehydrogenase, C-terminal domain
YALI0C11968g	9.58751	3.26116	1.83113e-21	6.02755e-20	UP		weakly similar to KLLA0E05632g Kluyveromyces lactis IPF 3479.1, hypothetical start
YALI0D08052g	9.52257	3.25135	3.93617e-30	2.42781e-28	UP		similar to uniprot|P00729 Saccharomyces cerevisiae YMR297w PRC1 carboxypeptidase y serine-type protease	YMR297W	PRC1	Vacuolar carboxypeptidase Y (proteinase C; CPY), broad-specificity C-terminal exopeptidase involved in non-specific protein degradation in the vacuole; member of the serine carboxypeptidase family	SIMILAR TO	Serine carboxypeptidase
YALI0C17567g	9.497	3.24747	2.8205e-05	0.000136471	UP		no similarity	YMR173W	DDR48	DNA damage-responsive protein, expression is increased in response to heat-shock stress or treatments that produce DNA lesions; contains multiple repeats of the amino acid sequence NNNDSYGS			DDR48	Immunogenic stress-associated protein; regulated by filamentous growth pathways; induced by benomyl, caspofungin, ketoconazole or in azole-resistant strain; Hog1p, farnesol, alkaline downregulated
YALI0D13772g	9.49098	3.24656	2.07355e-23	8.08177e-22	UP		no similarity, hypothetical start
YALI0E31339g	9.44626	3.23974	1.1965e-25	5.2064e-24	UP		weakly similar to uniprot|Q9P7E1 Schizosaccharomyces pombe Zf-C3HC4 ring finger protein, hypothetical start					Ring finger domain
YALI0A15796g	9.43613	3.2382	4.73051e-06	2.6857e-05	UP		weakly similar to KLLA-IPF4981.1 Kluyveromyces lactis KLLA0D06446g Hypothetical protein, probable adhesin, hypothetical start
YALI0B13728g	9.42207	3.23604	2.07905e-07	1.51297e-06	UP		similar to CA3607|CaRTA2 Candida albicans unknown function or CA3835|CaRTA4 Protein involved in 7- aminocholesterol resistance (by homology) or CA3606|CaRTA3 unknown function or CA0401|CaRTA1 unknown function	YOR049C	RSB1	Suppressor of sphingoid long chain base (LCB) sensitivity of an LCB-lyase mutation; putative integral membrane transporter or flippase that may transport LCBs from the cytoplasmic side toward the extracytoplasmic side of the membrane	SIMILAR TO	RTA1 like protein
YALI0A13277g	9.34785	3.22463	2.72171e-27	1.33008e-25	UP	ATG4	Probable cysteine protease ATG4 (EC 3.4.22.-) (Autophagy-related protein 4)	YNL223W	ATG4	Conserved cysteine protease required for autophagy; cleaves Atg8p to a form required for autophagosome and Cvt vesicle generation		Peptidase family C54
YALI0E05203g	9.34185	3.22371	4.6199e-14	7.88984e-13	UP		some similarities with uniprot|P08019 Saccharomyces cerevisiae YIL099w SGA1 sporulation specific glucan 1 4- alpha-glucosidase	YIL099W	SGA1	Intracellular sporulation-specific glucoamylase involved in glycogen degradation; induced during starvation of a/a diploids late in sporulation, but dispensable for sporulation		Glycosyl hydrolases family 15	SGA1	Putative glucoamylase; fungal-specific (no human or murine homolog)
YALI0A00957g	9.32515	3.22113	3.51348e-10	3.97174e-09	UP		similar to Q8U8U2 Agrobacterium tumefaciens, putative acetyl transferase, start by similarity					Acetyltransferase (GNAT) family
YALI0F07282g	9.26573	3.21191	2.49816e-05	0.000122365	UP		similar to uniprot|O59805 Schizosaccharomyces pombe Acetamidase and uniprot|P22580 Saccharomyces cerevisiae YDR242w AMD2 amidase, hypothetical start, pseudogene
YALI0C05621g	9.26029	3.21106	3.28049e-06	1.91729e-05	UP		similar to uniprot|P01097 Saccharomyces cerevisiae YDL181w INH1 inhibitor of mitochondrial ATPase	YDL181W	INH1	Protein that inhibits ATP hydrolysis by the F1F0-ATP synthase; inhibitory function is enhanced by stabilizing proteins Stf1p and Stf2p; has similarity to Stf1p; has a calmodulin-binding motif and binds calmodulin in vitro		Mitochondrial ATPase inhibitor, IATP
YALI0D10175g	9.24637	3.20889	7.88784e-19	2.12337e-17	UP		no similarity, hypothetical start					UBX domain
YALI0F25685g	9.16096	3.1955	1.45817e-15	2.904e-14	UP		weakly similar to uniprot|P38355 Saccharomyces cerevisiae YBR287w unknown function, start by similarity					Membrane transport protein
YALI0D25388g	9.14403	3.19283	8.63549e-24	3.42883e-22	UP	ATG1	Serine/threonine-protein kinase ATG1 (EC 2.7.11.1) (Autophagy-related protein 1)	YGL180W	ATG1	Protein ser/thr kinase required for vesicle formation in autophagy and the cytoplasm-to-vacuole targeting (Cvt) pathway; structurally required for phagophore assembly site formation; during autophagy forms a complex with Atg13p and Atg17p		Protein kinase domain Domain of unknown function (DUF3543)	orf19.3841	described as similar to S. cerevisiae Apg1p; induced upon adherence to polystyrene
YALI0F13607g	9.11988	3.18902	1.17738e-09	1.2425e-08	UP		similar to uniprot|P39709 Saccharomyces cerevisiae YAL067c SEO1 suppressor of sulfoxyde ethionine resistance	YAL067C	SEO1	Putative permease, member of the allantoate transporter subfamily of the major facilitator superfamily; mutation confers resistance to ethionine sulfoxide		Major Facilitator Superfamily
YALI0C00231g	9.05454	3.17864	2.76931e-07	1.97679e-06	UP		similar to uniprot|Q99156 Yarrowia lipolytica Lipase 1 precursor (EC 3.1.1.3), start by similarity					Carboxylesterase family
YALI0E19899g	9.01478	3.17229	1.79506e-10	2.1197e-09	UP		weakly similar to uniprot|Q7RZL5 Neurospora crassa NCU00350.1, hypothetical start					Alpha/beta hydrolase family
YALI0F07106g	8.95293	3.16236	1.72566e-05	8.74948e-05	UP		weakly similar to uniprot|P38680 Neurospora crassa NCU06619.1 N amino acid transport system protein (methyltryptophan resistance protein), hypothetical start					Transmembrane amino acid transporter protein
YALI0B19360g	8.92623	3.15805	1.17994e-23	4.62725e-22	UP		similar to uniprot|O59791 Schizosaccharomyces pombe Hypothetical protein C320.14 in chromosome III	YKL218C	SRY1	3-hydroxyaspartate dehydratase, deaminates L-threo-3-hydroxyaspartate to form oxaloacetate and ammonia; required in the presence of hydroxyaspartate; highly similar to mouse serine racemase (Srr) but has no serine racemase activity		Pyridoxal-phosphate dependent enzyme
YALI0B03124g	8.88131	3.15077	2.68706e-28	1.39926e-26	UP		similar to uniprot|Q8NKC1 Schizosaccharomyces pombe Putative O-methyltransferase, possibly involved in homocysteine metabolism, hypothetical start					O-methyltransferase	orf19.7140	Putative protein of unknown function, transcription is upregulated in clinical isolates from HIV+ patients with oral candidiasis; protein detected by mass spec in stationary phase cultures
YALI0F24409g	8.8661	3.1483	5.99787e-13	9.18181e-12	UP		weakly similar to uniprot|P53721 Saccharomyces cerevisiae YNR018w	YNR018W	AIM38	Putative protein of unknown function; non-tagged protein is detected in purified mitochondria; may interact with respiratory chain complex IV; null mutant is viable and displays reduced frequency of mitochondrial genome loss
YALI0E32967g	8.82507	3.14161	4.79445e-07	3.23003e-06	UP		weakly similar to uniprot|Q97P71 Streptococcus pneumoniae SP1772 Cell wall surface anchor family protein, hypothetical start
YALI0C00803g	8.78319	3.13475	1.45764e-13	2.35035e-12	UP		similar to uniprot|P30574 Candida albicans Carboxypeptidase Y precursor (EC 3.4.16.5) (Carboxypeptidase YSCY)	YBR139W		Putative serine type carboxypeptidase with a role in phytochelatin synthesis; green fluorescent protein (GFP)-fusion protein localizes to the vacuole; expression induced by nitrogen limitation in a GLN3, GAT1-independent manner	SIMILAR TO	Serine carboxypeptidase
YALI0E25113g	8.77215	3.13293	1.85005e-05	9.3133e-05	UP		no similarity, hypothetical start
YALI0B21230g	8.72943	3.12589	9.23944e-26	4.04815e-24	UP		similar to uniprot|Q8J289 Kluyveromyces lactis YGL104C similarity to glucose transport protein	YBR241C		Putative transporter, member of the sugar porter family; green fluorescent protein (GFP)-fusion protein localizes to the vacuolar membrane; YBR241C is not an essential gene		Sugar (and other) transporter
YALI0E12617g	8.7252	3.12519	3.21086e-29	1.87143e-27	UP		weakly similar to KLLA0F01969g Kluyveromyces lactis IPF 1820.1	YBR280C	SAF1	F-Box protein involved in proteasome-dependent degradation of Aah1p during entry of cells into quiescence; interacts with Skp1		Regulator of chromosome condensation (RCC1) repeat	orf19.5752
YALI0B19800g	8.72373	3.12495	1.93618e-12	2.82122e-11	UP		similar to uniprot|P19145 Saccharomyces cerevisiae YKR039W General amino-acid permease GAP1	YKR039W	GAP1	General amino acid permease; localization to the plasma membrane is regulated by nitrogen source	SIMILAR TO	Amino acid permease
YALI0B23122g	8.71306	3.12318	5.01794e-16	1.02835e-14	UP		NAD(P)H-hydrate epimerase (EC 5.1.99.6) (NAD(P)HX epimerase)	YNL200C		Putative protein of unknown function; the authentic, non-tagged protein is detected in highly purified mitochondria in high-throughput studies		YjeF-related protein N-terminus	orf19.3679	protein detected by mass spec in stationary phase cultures
YALI0C12518g	8.66968	3.11598	5.26859e-07	3.5382e-06	UP		no similarity, hypothetical start
YALI0E33429g	8.63721	3.11056	5.12133e-19	1.40241e-17	UP		weakly similar to YG59_METJA uniprot|Q59053 Methanococcus jannaschii Hypothetical ATP-binding protein MJ1659, hypothetical start					Archaeal ATPase
YALI0F12749g	8.59564	3.10361	2.2947e-14	4.04382e-13	UP		similar to uniprot|Q03529 Saccharomyces cerevisiae YMR272c SCS7 required for hydroxylation of ceramide	YMR272C	SCS7	Sphingolipid alpha-hydroxylase, functions in the alpha-hydroxylation of sphingolipid-associated very long chain fatty acids, has both cytochrome b5-like and hydroxylase/desaturase domains, not essential for growth		Fatty acid hydroxylase superfamily Cytochrome b5-like Heme/Steroid binding domain	SCS7	Protein described as ceramide hydroxylase; transcription is regulated by Nrg1p; transcriptionally regulated by iron; expression greater in high iron; fluconazole-induced
YALI0E27962g	8.5465	3.09533	1.0509e-28	5.61039e-27	UP		highly similar to uniprot|P31539 Saccharomyces cerevisiae YLL026w HSP104 heat shock protein	YLL026W	HSP104	Heat shock protein that cooperates with Ydj1p (Hsp40) and Ssa1p (Hsp70) to refold and reactivate previously denatured, aggregated proteins; responsive to stresses including: heat, ethanol, and sodium arsenite; involved in [PSI+] propagation		Clp amino terminal domain C-terminal, D2-small domain, of ClpB protein ATPase family associated with various cellular activities (AAA) AAA domain (Cdc48 subfamily)
YALI0E26499g	8.53566	3.0935	0.00692063	0.017953	UP		no similarity, possibly noncoding, hypothetical start
YALI0F30063g	8.52521	3.09174	1.28142e-15	2.56002e-14	UP		similar to uniprot|P47082 Saccharomyces cerevisiae YJR001w AVT1 neutral amino acid transporter	YJR001W	AVT1	Vacuolar transporter, imports large neutral amino acids into the vacuole; member of a family of seven S. cerevisiae genes (AVT1-7) related to vesicular GABA-glycine transporters		Transmembrane amino acid transporter protein	orf19.7100	possibly transcriptionally regulated upon hyphal formation
YALI0D15158g	8.5232	3.09139	5.06133e-29	2.82058e-27	UP		some similarities with uniprot|Q9XE85 Sorghum bicolor Polyprotein (putative retroelement)	YGR109W-B		Retrotransposon TYA Gag and TYB Pol genes; transcribed/translated as one unit; polyprotein is processed to make a nucleocapsid-like protein (Gag), reverse transcriptase (RT), protease (PR), and integrase (IN); similar to retroviral genes	SIMILAR TO	Retrotransposon gag protein
YALI0D22638g	8.50863	3.08893	4.61505e-29	2.61781e-27	UP		similar to DEHA0A10406g Debaryomyces hansenii IPF 7102.1	YBR287W		Protein of unknown function; green fluorescent protein (GFP)-fusion protein localizes to the ER; YBR287W is not an essential gene		Membrane transport protein
YALI0A01452g	8.46713	3.08187	1.95279e-08	1.70179e-07	UP		weakly similar to uniprot|P38841 Saccharomyces cerevisiae YHR138c Putative protein of unknown function					Peptidase inhibitor I9
YALI0E33935g	8.40755	3.07169	1.45048e-29	8.6933e-28	UP		weakly similar to KLLA0F16709g Kluyveromyces lactis	YOR059C		Hypothetical protein	SIMILAR TO	Putative serine esterase (DUF676)	orf19.4128
YALI0D10967g	8.30111	3.0533	2.41484e-10	2.79444e-09	UP		similar to uniprot|Q92389 Yarrowia lipolytica Acid extracellular protease precursor (EC 3.4.23.-)	YLR121C	YPS3	Aspartic protease, attached to the plasma membrane via a glycosylphosphatidylinositol (GPI) anchor	SIMILAR TO	Eukaryotic aspartyl protease
YALI0F25641g	8.28827	3.05107	5.78758e-20	1.72622e-18	UP		weakly similar to uniprot|Q8DZ17 Streptococcus agalactiae putative homocysteine S-methyltransferase MmuM	YLL062C	MHT1	S-methylmethionine-homocysteine methyltransferase, functions along with Sam4p in the conversion of S-adenosylmethionine (AdoMet) to methionine to control the methionine/AdoMet ratio		Homocysteine S-methyltransferase	SAM4	Alkaline upregulated
YALI0F22693g	8.28317	3.05018	2.80998e-29	1.65295e-27	UP		no similarity, hypothetical start
YALI0F27159g	8.2352	3.0418	9.96783e-25	4.16616e-23	UP		some similarities with uniprot|P47042 Saccharomyces cerevisiae YJL057c IKS1 probable serine/threonine-protein kinase	YJL057C	IKS1	Putative serine/threonine kinase; expression is induced during mild heat stress; deletion mutants are hypersensitive to copper sulphate and resistant to sorbate; interacts with an N-terminal fragment of Sst2p		Protein kinase domain	orf19.428	induced during planktonic growth
YALI0C21604g	8.18052	3.03219	9.38278e-27	4.41546e-25	UP		similar to uniprot|P00729 Saccharomyces cerevisiae YMR297w PRC1 carboxypeptidase y serine-type protease P3.65. f3.1	YMR297W	PRC1	Vacuolar carboxypeptidase Y (proteinase C; CPY), broad-specificity C-terminal exopeptidase involved in non-specific protein degradation in the vacuole; member of the serine carboxypeptidase family	SIMILAR TO	Serine carboxypeptidase
YALI0A15906g	8.18003	3.03211	4.93109e-09	4.72912e-08	UP		similar to uniprot|P14065 Saccharomyces cerevisiae YOR120w GCY1 galactose-induced protein of aldo/keto reductase family	YOR120W	GCY1	Putative NADP(+) coupled glycerol dehydrogenase, proposed to be involved in an alternative pathway for glycerol catabolism; member of the aldo-keto reductase (AKR) family	SIMILAR TO	Aldo/keto reductase family
YALI0B00770g	8.16678	3.02977	2.15387e-06	1.3032e-05	UP		weakly similar to uniprot|Q3E756 Saccharomyces cerevisiae YBL029C-A predicted protein	YBL029C-A		Protein of unknown function; green fluorescent protein (GFP)-fusion protein localizes to the cell periphery; has potential orthologs in Saccharomyces species and in Yarrowia lipolytica
YALI0E11143g	8.10694	3.01916	2.74688e-08	2.31752e-07	UP		some similarities with DEHA0F01892g Debaryomyces hansenii, hypothetical start
YALI0B02662g	8.0939	3.01684	8.19524e-28	4.16515e-26	UP		no similarity, hypothetical start
YALI0F11627g	8.08279	3.01485	1.06787e-07	8.1443e-07	UP		similar to DEHA0E08085g Debaryomyces hansenii, hypothetical start					Cysteine dioxygenase type I
YALI0F31581g	8.03661	3.00659	6.50028e-05	0.000287779	UP		no similarity, possibly noncoding, hypothetical start
YALI0D15488g	8.02101	3.00378	9.87145e-15	1.8073e-13	UP		weakly similar to uniprot|O14091 Schizosaccharomyces pombe General alpha-glucoside permease, hypothetical start					Major Facilitator Superfamily
YALI0E23991g	7.98027	2.99644	2.49435e-26	1.14004e-24	UP		similar to uniprot|Q9C2P6 Neurospora crassa Related to UTR1 (Associated with ferric reductase activity)	YJR049C	UTR1	ATP-NADH kinase; phosphorylates both NAD and NADH; active as a hexamer; enhances the activity of ferric reductase (Fre1p)	SIMILAR TO	ATP-NAD kinase
YALI0F11297g	7.98009	2.99641	3.93057e-27	1.90617e-25	UP		similar to uniprot|P53045 Saccharomyces cerevisiae YGR060w and DEHA0A12661g Debaryomyces hansenii	YGR060W	ERG25	C-4 methyl sterol oxidase, catalyzes the first of three steps required to remove two C-4 methyl groups from an intermediate in ergosterol biosynthesis; mutants accumulate the sterol intermediate 4,4-dimethylzymosterol		Fatty acid hydroxylase superfamily
YALI0C01507g	7.96196	2.99312	2.0071e-14	3.57174e-13	UP		no similarity, hypothetical start
YALI0E20141g	7.9412	2.98936	2.09059e-26	9.62429e-25	UP		similar to uniprot|Q12012 Saccharomyces cerevisiae YOR289w	YOR289W		Putative protein of unknown function; transcription induced by the unfolded protein response; green fluorescent protein (GFP)-fusion protein localizes to both the cytoplasm and the nucleus		AMMECR1	orf19.2047	mutation confers hypersensitivity to toxic ergosterol analog, and to amphotericin B
YALI0E31775g	7.9313	2.98756	6.94205e-05	0.000304578	UP		No similarity, identified by cDNA
YALI0B21274g	7.9116	2.98397	8.08483e-07	5.26799e-06	UP		no similarity, hypothetical start
YALI0B02684g	7.82785	2.96862	0.0115211	0.0277881	UP		similar to uniprot|Q9UVL6 Candida albicans Copper resistance-associated P-type ATPase	YDR270W	CCC2	Cu(+2)-transporting P-type ATPase, required for export of copper from the cytosol into an extracytosolic compartment; has similarity to human proteins involved in Menkes and Wilsons diseases	SIMILAR TO	Heavy-metal-associated domain haloacid dehalogenase-like hydrolase E1-E2 ATPase	CRP1	Copper transporter of the plasma membrane; P1-type ATPase (CPx type); mediates Cu resistance; similar to proteins of Menkes and Wilson disease; copper-induced; Tbf1p-activated; suppresses Cu sensitivity of S. cerevisiae cup1 null mutant
YALI0E08756g	7.81463	2.96618	2.72886e-11	3.47424e-10	UP		similar to uniprot|P01119 Saccharomyces cerevisiae YOR101w RAS1 GTP-binding protein	YOR101W	RAS1	GTPase involved in G-protein signaling in the adenylate cyclase activating pathway, plays a role in cell proliferation; localized to the plasma membrane; homolog of mammalian RAS proto-oncogenes		Ras family	RAS1	RAS signal transduction GTPase; regulates cAMP and MAP kinase pathways; role in hyphal induction, virulence, apoptosis, heat-shock sensitivity; nonessential; plasma membrane-localized; complements viability of S. cerevisiae ras1 ras2 mutant
YALI0D11022g	7.81235	2.96576	5.58557e-15	1.04062e-13	UP		some similarities with uniprot|Q03722 Saccharomyces cerevisiae YML020W Hypothetical 76.1 kDa protein in UNG1- OST6 intergenic region	YML020W		Putative protein of unknown function			orf19.7403
YALI0A04323g	7.80988	2.9653	1.02164e-06	6.57598e-06	UP		weakly similar to uniprot|Q7S0H1 Neurospora crassa NCU06945.1 related to 2'-hydroxyisoflavone reductase, start by similarity					NmrA-like family	CIP1	Protein with slight similarity to plant isoflavone reductase; transcription induced by cadmium (specifically, not by other heavy metals or heat shock), yeast-hyphal switch, oxidative stress (via Cap1p), or macrophage interaction
YALI0F02255g	7.76887	2.95771	7.98853e-27	3.7874e-25	UP		no similarity, hypothetical start
YALI0F16896g	7.70144	2.94513	1.24311e-26	5.80698e-25	UP		similar to uniprot|P40260 Saccharomyces cerevisiae YGR121c MEP1 ammonia permease of high capacity and moderate affinity or uniprot|P53390 Saccharomyces cerevisiae YPR138c MEP3 low affinity high capacity ammonium permease	YPR138C	MEP3	Ammonium permease of high capacity and low affinity; belongs to a ubiquitous family of cytoplasmic membrane proteins that transport only ammonium (NH4+); expression is under the nitrogen catabolite repression regulation ammonia permease		Ammonium Transporter Family	MEP1	Ammonium permease; Mep1p is a more efficient ammonium permease than Mep2p, whereas Mep2p has additional regulatory role; not essential for viability; 11 predicted transmembrane regions; low mRNA abundance; hyphal downregulated
YALI0C11781g	7.65958	2.93726	6.52391e-23	2.46705e-21	UP		no similarity, hypothetical start
YALI0E05643g	7.65893	2.93714	7.45549e-26	3.28922e-24	UP		similar to uniprot|Q9WYD3 Thermotoga maritima TM0297 Oxidoreductase short chain dehydrogenase/reductase	YNL202W	SPS19	Peroxisomal 2,4-dienoyl-CoA reductase, auxiliary enzyme of fatty acid beta-oxidation; homodimeric enzyme required for growth and sporulation on petroselineate medium; expression induced during late sporulation and in the presence of oleate	SIMILAR TO	Enoyl-(Acyl carrier protein) reductase
YALI0E05841g	7.63982	2.93354	1.81957e-19	5.25442e-18	UP		weakly similar to uniprot|O93846 Magnaporthe grisea PATH531 Pathogenicity protein, hypothetical start					TB2/DP1, HVA22 family
YALI0C13827g	7.6085	2.92761	3.21471e-08	2.68019e-07	UP		some similarities with uniprot|Q05637 Saccharomyces cerevisiae PHM6 S000007515 YDR281C Protein of unknown function, expression is regulated by phosphate levels
YALI0C02233g	7.60547	2.92704	3.85761e-10	4.32992e-09	UP		no similarity, hypothetical start
YALI0D22242g	7.60412	2.92678	0.00170488	0.00520955	UP		no similarity, hypothetical start
YALI0A18810g	7.59883	2.92578	6.09639e-26	2.70842e-24	UP		similar to uniprot|P00729 Saccharomyces cerevisiae YMR297w PRC1 carboxypeptidase y serine-type protease	YMR297W	PRC1	Vacuolar carboxypeptidase Y (proteinase C; CPY), broad-specificity C-terminal exopeptidase involved in non-specific protein degradation in the vacuole; member of the serine carboxypeptidase family		Serine carboxypeptidase	CPY1	Carboxypeptidase Y; transcriptionally regulated at yeast-hyphal transition or macrophage response; upregulated in the presence of human neutrophils; regulated by Gcn2p and Gcn4p; putative N-glycosylation
YALI0D08140g	7.57585	2.92141	3.61837e-07	2.52888e-06	UP		similar to uniprot|P36110 Saccharomyces cerevisiae YKR013w PRY2 protein precursor (Pathogen related in Sc 2)	YKR013W	PRY2	Protein of unknown function		Cysteine-rich secretory protein family	RBE1	Putative cell wall protein; transcription is negatively regulated by Rim101p, Efg1p, Ssn6p; alkaline downregulated; predicted signal sequence, O-glycosylation; no GPI anchor predicted; ketoconazol upregulated
YALI0D19316g	7.54508	2.91554	3.93185e-16	8.16308e-15	UP		no similarity, hypothetical start
YALI0E15862g	7.52296	2.9113	1.84009e-20	5.62023e-19	UP		no similarity, hypothetical start
YALI0D06347g	7.51145	2.90909	5.96717e-20	1.77147e-18	UP		similar to uniprot|Q12042 Saccharomyces cerevisiae YPL162C P2558 protein	YPL162C		Putative protein of unknown function; green fluorescent protein (GFP)-fusion protein localizes to the membrane of vacuole with cell cycle-correlated morphology		Vaculolar membrane protein	orf19.2006
YALI0B16500g	7.50626	2.90809	5.84981e-28	3.02145e-26	UP		similar to uniprot|P09232 Saccharomyces cerevisiae YEL060c PRB1 protease B vacuolar P3.40.f3.1	YEL060C	PRB1	Vacuolar proteinase B (yscB), a serine protease of the subtilisin family; involved in protein degradation in the vacuole and required for full protein degradation during sporulation		Subtilase family Peptidase inhibitor I9	orf19.7196	Protein described as a vacuolar protease; upregulated in the presence of human neutrophils
YALI0B14289g	7.48682	2.90435	1.34287e-16	2.90178e-15	UP		similar to uniprot|P22506 Saccharomycopsis fibuligera Beta-glucosidase 1 precursor (EC 3.2.1.21), start by similarity					Glycosyl hydrolase family 3 N terminal domain Glycosyl hydrolase family 3 C-terminal domain Fibronectin type III-like domain
YALI0C21362g	7.4758	2.90223	1.51113e-27	7.5592e-26	UP		similar to uniprot|P39676 Saccharomyces cerevisiae YGR234w YHB1 flavohemoglobin	YGR234W	YHB1	Nitric oxide oxidoreductase, flavohemoglobin involved in nitric oxide detoxification; plays a role in the oxidative and nitrosative stress responses		Oxidoreductase NAD-binding domain Oxidoreductase FAD-binding domain Globin
YALI0C23078g	7.44242	2.89577	1.20423e-24	5.00032e-23	UP		weakly similar to uniprot|Q12284 Saccharomyces cerevisiae YPR037C ERV2 protein mitochondrial precursor	YPR037C	ERV2	Flavin-linked sulfhydryl oxidase localized to the endoplasmic reticulum lumen, involved in disulfide bond formation within the ER		Erv1 / Alr family	orf19.6552
YALI0F05940g	7.43262	2.89387	0.000186875	0.000726572	UP		similar to uniprot|Q01532 Saccharomyces cerevisiae YNL239w	YNL239W	LAP3	Cysteine aminopeptidase with homocysteine-thiolactonase activity; protects cells against homocysteine toxicity; has bleomycin hydrolase activity in vitro; transcription is regulated by galactose via Gal4p; orthologous to human BLMH		Peptidase C1-like family
YALI0E25179g	7.42823	2.89302	0.000246554	0.000938502	UP		weakly similar to uniprot|O74852 Schizosaccharomyces pombe, hypothetical start					Major Facilitator Superfamily
YALI0F23595g	7.41999	2.89142	3.68754e-26	1.67335e-24	UP		Lon protease homolog 2, peroxisomal (EC 3.4.21.-)	YBL022C	PIM1	ATP-dependent Lon protease, involved in degradation of misfolded proteins in mitochondria; required for biogenesis and maintenance of mitochondria	SIMILAR TO	Lon protease (S16) C-terminal proteolytic domain ATPase family associated with various cellular activities (AAA) ATP-dependent protease La (LON) domain	orf19.6973	regulated by Gcn2p and Gcn4p
YALI0E25047g	7.39809	2.88715	8.17594e-28	4.16515e-26	UP		no similarity, hypothetical start
YALI0F05390g	7.38737	2.88506	4.0082e-24	1.61165e-22	UP	EXG1	Glucan 1,3-beta-glucosidase (EC 3.2.1.58) (Exo-1,3-beta-glucanase)	YLR300W	EXG1	Major exo-1,3-beta-glucanase of the cell wall, involved in cell wall beta-glucan assembly; exists as three differentially glycosylated isoenzymes		Cellulase (glycosyl hydrolase family 5)	XOG1	Exo-1,3-beta-glucanase, major exoglucanase; member of family 5 glycosyl hydrolases; affects sensitivity to inhibitors of chitin and glucan synthesis; not required for yeast-to-hyphal transition or for virulence in mouse systemic infection
YALI0C11803g	7.38699	2.88499	1.46983e-26	6.81595e-25	UP		similar to uniprot|P00817 Saccharomyces cerevisiae YBR011c Inorganic pyrophosphatase	YBR011C	IPP1	Cytoplasmic inorganic pyrophosphatase (PPase), homodimer that catalyzes the rapid exchange of oxygens from Pi with water, highly expressed and essential for viability, active-site residues show identity to those from E. coli PPase	SIMILAR TO	Inorganic pyrophosphatase
YALI0B13200g	7.37335	2.88232	4.21485e-10	4.70597e-09	UP		some similarities with uniprot|Q8X1W6 Aspergillus oryzae Putative transcriptional activator, start by similarity					Minimal binding motif of Hap4 for binding to Hap2/3/5	HAP43	CCAAT-binding factor (CBF)-dependent transcription factor required for iron-limitation response; similar to transcription factor AP-1; transcription is negatively regulated by Sfu1p; ciclopirox olamine induced
YALI0E17215g	7.36043	2.87979	1.83185e-17	4.2629e-16	UP		some similarities with uniprot|P32338 Saccharomyces cerevisiae YGR044c RME1 zinc-finger transcription factor	YGR044C	RME1	Zinc finger protein involved in control of meiosis; prevents meiosis by repressing IME1 expression and promotes mitosis by activating CLN2 expression; directly repressed by a1-alpha2 regulator; mediates cell type control of sporulation		Zinc-finger double domain C2H2-type zinc finger
YALI0F11077g	7.35703	2.87912	1.34356e-06	8.4511e-06	UP		similar to uniprot|P38841 Saccharomyces cerevisiae YHR138c, hypothetical start					Peptidase inhibitor I9
YALI0B03916g	7.35699	2.87911	4.71432e-07	3.18618e-06	UP		similar to uniprot|P40029 Saccharomyces cerevisiae YER042w MXR1 Peptide methionine sulfoxide reductase (EC 1. 8.4.6) (Protein-methionine-S-oxide reductase) (Peptide Met(O) reductase)	YER042W	MXR1	Methionine-S-sulfoxide reductase, involved in the response to oxidative stress; protects iron-sulfur clusters from oxidative inactivation along with MXR2; involved in the regulation of lifespan	SIMILAR TO	Peptide methionine sulfoxide reductase
YALI0E18458g	7.35259	2.87825	3.99615e-17	9.03472e-16	UP		similar to uniprot|Q6C722 Yarrowia lipolytica YALI0E04422g, hypothetical start
YALI0E20713g	7.32214	2.87227	2.18507e-21	7.15556e-20	UP		similar to uniprot|P43548 Saccharomyces cerevisiae YFL055w AGP3 amino acid permease	YFL055W	AGP3	Low-affinity amino acid permease, may act to supply the cell with amino acids as nitrogen source in nitrogen-poor conditions; transcription is induced under conditions of sulfur limitation; plays a role in regulating Ty1 transposition		Amino acid permease	AGP3	Putative serine transporter with possible role in assimilation of sulfur; induced upon early biofilm formation; fungal-specific (no human or murine homolog)
YALI0D13200g	7.32035	2.87191	0.00543931	0.0144707	UP		no similarity, hypothetical start
YALI0E22132g	7.28403	2.86474	0.00650327	0.0170092	UP		no similarity, possibly noncoding, hypothetical start
YALI0F12617g	7.26865	2.86169	5.54388e-08	4.40804e-07	UP		some similarities with DEHA0E16269g Debaryomyces hansenii, hypothetical start					Stage II sporulation protein E (SpoIIE)	PTC8	Predicted type 2C protein phosphatase, serine/threonine-specific; required for hyphal growth; induced under stress
YALI0F25487g	7.24587	2.85716	3.64488e-11	4.57626e-10	UP		weakly similar to uniprot|O07408 Mycobacterium tuberculosis hypothetical protein and uniprot|Q9HU04 Pseudomonas aeruginosa hypothetical protein and uniprot|Q9DCP4 Mus musculus hypothetical protein, hypothetical start
YALI0B04796g	7.19252	2.8465	2.86534e-22	1.01131e-20	UP		some similarities with uniprot|P35198 Saccharomyces cerevisiae YDR277c MTH1 protein	YOR047C	STD1	Protein involved in control of glucose-regulated gene expression; interacts with protein kinase Snf1p, glucose sensors Snf3p and Rgt2p, and TATA-binding protein Spt15p; acts as a regulator of the transcription factor Rgt1p
YALI0E06061g	7.18487	2.84496	8.89474e-24	3.50983e-22	UP	CHO2	Phosphatidylethanolamine N-methyltransferase (PEAMT) (EC 2.1.1.17)	YGR157W	CHO2	Phosphatidylethanolamine methyltransferase (PEMT), catalyzes the first step in the conversion of phosphatidylethanolamine to phosphatidylcholine during the methylation pathway of phosphatidylcholine biosynthesis		Phospholipid methyltransferase
YALI0E20383g	7.15244	2.83843	3.54803e-13	5.52467e-12	UP		some similarities with uniprot|P38216 Saccharomyces cerevisiae YBR016w, hypothetical start					Cysteine-rich TM module stress tolerance
YALI0C21043g	7.11796	2.83146	2.05886e-24	8.43869e-23	UP		similar to uniprot|O14313 Schizosaccharomyces pombe Peroxisomal membrane protein pmp20	YLR109W	AHP1	Thiol-specific peroxiredoxin, reduces hydroperoxides to protect against oxidative damage; function in vivo requires covalent conjugation to Urm1p	SIMILAR TO	Redoxin	TRP99	Protein described as thioredoxin peroxidase/alkyl hydroperoxide reductase; transcriptionally regulated by iron; expression greater in low iron; regulated by Gcn4p; induced in response to amino acid starvation (3-aminotriazole treatment)
YALI0E11847g	7.11456	2.83077	2.26754e-24	9.23439e-23	UP		similar to DEHA0E05885g Debaryomyces hansenii putative amidase	YDR242W	AMD2	Putative amidase	SIMILAR TO	Amidase
YALI0E19789g	7.07937	2.82362	6.4772e-10	7.11932e-09	UP		weakly similar to uniprot|Q897E2 Clostridium tetani 3-oxoacyl-[acyl-carrier-protein] reductase, hypothetical start					Enoyl-(Acyl carrier protein) reductase
YALI0B10890g	7.04859	2.81733	5.31248e-19	1.44851e-17	UP		some similarities with uniprot|Q9V951 Drosophila melanogaster CG9945 protein (AT18160p), hypothetical start					WD domain, G-beta repeat
YALI0E10043g	7.02698	2.81291	1.35813e-21	4.56519e-20	UP		weakly similar to uniprot|Q9P5S9 Neurospora crassa Nebula related protein, hypothetical start					Calcipressin
YALI0F01672g	7.01896	2.81126	2.91087e-08	2.44937e-07	UP		similar to uniprot|P07337 Kluyveromyces marxianus Beta-glucosidase precursor (Gentiobiase) (Cellobiase) and DEHA0B07491g Debaryomyces hansenii IPF 9746.1, hypothetical start					PA14 domain Glycosyl hydrolase family 3 N terminal domain Glycosyl hydrolase family 3 C-terminal domain Fibronectin type III-like domain	orf19.1664	decreased expression observed in an ssr1 homozygous null mutant
YALI0F30041g	7.01262	2.80995	0.000745918	0.00251797	UP		similar to uniprot|Q06593 Saccharomyces cerevisiae YPR194c OPT2 oligopeptide transporter	YPR194C	OPT2	Oligopeptide transporter; member of the OPT family, with potential orthologs in S. pombe and C. albicans; also plays a role in formation of mature vacuoles	SIMILAR TO	OPT oligopeptide transporter protein
YALI0D00132g	6.99972	2.8073	0.0081983	0.0206682	UP		similar to uniprot|Q9P3B9 Neurospora crassa related to myo-inositol permease	YOL103W	ITR2	Myo-inositol transporter with strong similarity to the major myo-inositol transporter Itr1p, member of the sugar transporter superfamily; expressed constitutively	SIMILAR TO	Sugar (and other) transporter	HGT19	Putative glucose/myo-inositol transporter of major facilitator superfamily; 12 transmembrane segments, extended N terminus; expressed in rich medium, 2% glucose; phagocytosis-induced; C. albicans glucose transporter family has 20 members
YALI0E09427g	6.99097	2.80549	0.00429836	0.0117959	UP		similar to uniprot|P22217 Saccharomyces cerevisiae YLR043c TRX1 thioredoxin I	YLR043C	TRX1	Cytoplasmic thioredoxin isoenzyme of the thioredoxin system which protects cells against oxidative and reductive stress, forms LMA1 complex with Pbi2p, acts as a cofactor for Tsa1p, required for ER-Golgi transport and vacuole inheritance	SIMILAR TO	Thioredoxin
YALI0F02046g	6.9906	2.80542	1.70762e-11	2.22763e-10	UP		weakly similar to uniprot|Q2U4N1 Aspergillus oryzae, identified by cDNA
YALI0B05346g	6.98382	2.80402	4.93532e-09	4.72912e-08	UP		similar to DEHA0E22990g Debaryomyces hansenii IPF 11107.1, start by similarity					Thioredoxin	orf19.4639	protein detected by mass spec in exponential and stationary phase cultures
YALI0E30608g	6.9811	2.80345	6.16761e-08	4.87349e-07	UP		weakly similar to uniprot|Q05809 Saccharomyces cerevisiae YLR218C Putative protein of unknown function
YALI0D20878g	6.97975	2.80317	1.92564e-25	8.26595e-24	UP		similar to uniprot|P32353 Saccharomyces cerevisiae YLR056w ERG3 C-5 sterol desaturase singleton	YLR056W	ERG3	C-5 sterol desaturase, catalyzes the introduction of a C-5(6) double bond into episterol, a precursor in ergosterol biosynthesis; mutants are viable, but cannot grow on non-fermentable carbon sources		Fatty acid hydroxylase superfamily	ERG3	C-5 sterol desaturase; introduces C-5(6) double bond into episterol in ergosterol biosynthesis; clinically-isolated homozygous null mutants show azole resistance, defects in hyphal growth and virulence; Efg1p-repressed; fluconazole-induced
YALI0A19536g	6.95584	2.79822	9.51176e-14	1.55342e-12	UP		weakly similar to uniprot|Q873D6 Neurospora crassa B17B1.060	YDL114W		Putative protein of unknown function with similarity to acyl-carrier-protein reductases; YDL114W is not an essential gene	SIMILAR TO	short chain dehydrogenase
YALI0F19844g	6.9454	2.79606	4.72604e-17	1.0572e-15	UP		some similarities with uniprot|P40514 Saccharomyces cerevisiae YIL067c hypothetical protein	YIL067C		Uncharacterized protein of unknown function		LCCL domain	orf19.5780
YALI0F18964g	6.92098	2.79098	3.69611e-25	1.57593e-23	UP		similar to uniprot|Q06593 Saccharomyces cerevisiae YPR194c OPT2	YPR194C	OPT2	Oligopeptide transporter; member of the OPT family, with potential orthologs in S. pombe and C. albicans; also plays a role in formation of mature vacuoles	SIMILAR TO	OPT oligopeptide transporter protein
YALI0F29821g	6.87042	2.7804	1.76942e-22	6.35093e-21	UP		similar to DEHA0C16368g Debaryomyces hansenii and CA3388|IPF6755 Candida albicans	YIR036C	IRC24	Putative benzil reductase;(GFP)-fusion protein localizes to the cytoplasm and is induced by the DNA-damaging agent MMS; sequence similarity with short-chain dehydrogenase/reductases; null mutant has increased spontaneous Rad52p foci	SIMILAR TO	short chain dehydrogenase
YALI0D02761g	6.798	2.76511	0.00201396	0.00600689	UP		weakly similar to wi|NCU05726.1 Neurospora crassa NCU05726.1 hypothetical protein, hypothetical start					Cyclin
YALI0E20119g	6.76943	2.75903	1.75028e-22	6.35093e-21	UP		similar to uniprot|P40029 Saccharomyces cerevisiae YER042w MXR1 responsible for the reduction of methionine sulfoxide	YER042W	MXR1	Methionine-S-sulfoxide reductase, involved in the response to oxidative stress; protects iron-sulfur clusters from oxidative inactivation along with MXR2; involved in the regulation of lifespan		Peptide methionine sulfoxide reductase	MXR1	Protein described as a methionine sulfoxide reductase; flucytosine induced; Plc1p-regulated; upregulated in the presence of human neutrophils; macrophage regulated (gene induced, protein decreased); possibly adherence-induced
YALI0D20262g	6.76244	2.75754	8.41419e-19	2.2555e-17	UP		similar to uniprot|Q02896 Saccharomyces cerevisiae YPL087w YDC1 alkaline dihydroceramidase	YPL087W	YDC1	Alkaline dihydroceramidase, involved in sphingolipid metabolism; preferentially hydrolyzes dihydroceramide to a free fatty acid and dihydrosphingosine; has a minor reverse activity		Ceramidase	YDC1	Protein with Mob2p-dependent hyphal regulation; transcription is regulated by Nrg1p and Mig1p
YALI0B09867g	6.74115	2.75299	7.98192e-09	7.31734e-08	UP		weakly similar to KLLA-IPF2857.1 Kluyveromyces lactis KLLA0E14586g putative flocculation protein, hypothetical start
YALI0A10120g	6.73013	2.75063	5.54365e-14	9.39168e-13	UP		weakly similar to wi|NCU02617.1 Neurospora crassa NCU02617.1 hypothetical protein, hypothetical start					Galactose oxidase, central domain BTB/POZ domain
YALI0C04158g	6.72499	2.74953	6.00828e-23	2.29943e-21	UP		similar to uniprot|P18961 Saccharomyces cerevisiae YMR104C Serine/threonine-protein kinase YPK2/YKR2	YMR104C	YPK2	Protein kinase with similarity to serine/threonine protein kinase Ypk1p; functionally redundant with YPK1 at the genetic level; participates in a signaling pathway required for optimal cell wall integrity; homolog of mammalian kinase SGK	SIMILAR TO	Protein kinase domain Protein kinase C terminal domain
YALI0A20273g	6.6899	2.74198	9.08493e-14	1.49138e-12	UP		weakly similar to uniprot|P38993 Saccharomyces cerevisiae YMR058w FET3 cell surface ferroxidase (high affinity )	YMR058W	FET3	Ferro-O2-oxidoreductase required for high-affinity iron uptake and involved in mediating resistance to copper ion toxicity, belongs to class of integral membrane multicopper oxidases	SIMILAR TO	Multicopper oxidase
YALI0A06743g	6.67015	2.73772	1.87054e-19	5.37717e-18	UP		similar to uniprot|Q8NJZ8 Emericella nidulans Theta class glutathione S-transferase (EC 2.5.1.18)	YNL229C	URE2	Nitrogen catabolite repression transcriptional regulator that acts by inhibition of GLN3 transcription in good nitrogen source; has glutathione peroxidase activity and can mutate to acquire GST activity; altered form creates [URE3] prion	SIMILAR TO	Glutathione S-transferase, N-terminal domain Glutathione S-transferase, C-terminal domain
YALI0D11286g	6.66692	2.73702	2.91709e-08	2.45136e-07	UP		no similarity, hypothetical start
YALI0A14905g	6.64849	2.73303	0.00892769	0.0222422	UP		weakly similar to uniprot|Q6CBL4 Yarrowia lipolytica YALI0C17589g, start by similarity
YALI0A13013g	6.64207	2.73163	1.25272e-05	6.57187e-05	UP		weakly similar to uniprot|Q12303 Saccharomyces cerevisiae YLR121c YPS3 GPI-anchored aspartyl protease 3	YLR121C	YPS3	Aspartic protease, attached to the plasma membrane via a glycosylphosphatidylinositol (GPI) anchor	SIMILAR TO	Eukaryotic aspartyl protease
YALI0B08558g	6.6392	2.73101	7.28926e-06	3.99902e-05	UP		weakly similar to uniprot|Q03785 Saccharomyces cerevisiae YDR247w VHS1 and weakly similar to uniprot|Q12505 Saccharomyces cerevisiae YPL026C Serine/threonine-protein kinase SKS1 (Suppressor kinase of SNF3)	YDR247W	VHS1	Cytoplasmic serine/threonine protein kinase; identified as a high-copy suppressor of the synthetic lethality of a sis2 sit4 double mutant, suggesting a role in G1/S phase progression; homolog of Sks1p		Protein kinase domain	SHA3	Protein similar to S. cerevisiae Sha3p, a serine/threonine kinase involved in glucose transport; transposon mutation affects filamentous growth; fluconazole-induced; ketoconazole-repressed; induced in by alpha pheromone; possibly essential
YALI0C22341g	6.63293	2.72965	3.51282e-23	1.35254e-21	UP	RTC5	Restriction of telomere capping protein 5	YOR118W	RTC5	Protein of unknown function; green fluorescent protein (GFP)-fusion protein localizes to the cytoplasm; null mutation suppresses cdc13-1 temperature sensitivity		TLD
YALI0C06193g	6.603	2.72312	8.44883e-23	3.15738e-21	UP		similar to uniprot|Q06170 Saccharomyces cerevisiae YLR326w hypothetical protein	YLR326W		Putative protein of unknown function, predicted to be palmitoylated		Domain of unknown function (DUF4112)	orf19.2106
YALI0B07403g	6.53679	2.70858	2.17396e-18	5.50247e-17	UP		some similarities with uniprot|P38195 Saccharomyces cerevisiae YBL043w ECM13 involved in cell wall structure of biosynthesis, start by similarity
YALI0B23430g	6.52976	2.70703	2.28124e-22	8.09647e-21	UP		weakly similar to uniprot|P31225 Candida albicans Corticosteroid-binding protein	YMR020W	FMS1	Polyamine oxidase, converts spermine to spermidine, which is required for the essential hypusination modification of translation factor eIF-5A; also involved in pantothenic acid biosynthesis		Flavin containing amine oxidoreductase	orf19.4589
YALI0A04785g	6.49611	2.69958	2.40454e-12	3.45612e-11	UP		no similarity, hypothetical start					BTB/POZ domain
YALI0B09991g	6.49063	2.69836	2.59117e-07	1.86429e-06	UP		some similarities with DEHA0D15972g Debaryomyces hansenii IPF 2966.1, hypothetical start					Putative phosphatase regulatory subunit	orf19.3302	transcription downregulated upon yeast-hyphal switch; transcriptionally activated by Mnl1p under weak acid stress
YALI0A01067g	6.48185	2.69641	9.60247e-22	3.26227e-20	UP		weakly similar to uniprot|Q08422 Saccharomyces cerevisiae Chromosome XV reading frame ORF YOR052C	YOR052C		Nuclear protein of unknown function; expression induced by nitrogen limitation in a GLN3, GAT1-independent manner and by weak acid		Ubiquitin family AN1-like Zinc finger	orf19.5813	expression upregulated during growth in the mouse cecum
YALI0F00946g	6.44592	2.68839	3.26257e-08	2.71653e-07	UP		no similarity, hypothetical start
YALI0F16159g	6.40358	2.67888	1.04444e-22	3.85774e-21	UP		some similarities with uniprot|Q12263 Saccharomyces cerevisiae YDR507c GIN4 ser/thr protein kinase	YKL171W		Putative protein kinase; implicated in proteasome function; epitope-tagged protein localizes to the cytoplasm		Protein kinase domain
YALI0F23485g	6.39557	2.67707	6.11274e-12	8.38973e-11	UP		some similarities with uniprot|Q7S4C9 Neurospora crassa NCU02191.1 hypothetical protein, hypothetical start					Fringe-like
YALI0D05269g	6.38718	2.67518	1.67058e-18	4.29683e-17	UP		no similarity, hypothetical start
YALI0D14322g	6.34994	2.66674	1.44831e-21	4.84268e-20	UP		similar to uniprot|P38075 Saccharomyces cerevisiae YBR035c PDX3 pyridoxamine-phosphate oxidase	YBR035C	PDX3	Pyridoxine (pyridoxamine) phosphate oxidase, has homologs in E. coli and Myxococcus xanthus; transcription is under the general control of nitrogen metabolism		Pyridoxine 5'-phosphate oxidase C-terminal dimerisation region Pyridoxamine 5'-phosphate oxidase
YALI0E19272g	6.34376	2.66534	1.87381e-18	4.78084e-17	UP		weakly similar to uniprot|Q12350 Saccharomyces cerevisiae YPR061c related to dnaJ proteins	YPR061C	JID1	Probable Hsp40p co-chaperone, has a DnaJ-like domain and appears to be involved in ER-associated degradation of misfolded proteins containing a tightly folded cytoplasmic domain; inhibits replication of Brome mosaic virus in S. cerevisiae		DnaJ domain	orf19.1169
YALI0A10296g	6.33432	2.66319	2.29623e-12	3.32299e-11	UP		weakly similar to uniprot|O18158 Caenorhabditis elegans UDP-N-acetylglucosamine--peptide N-acetylglucosaminyltransferase (EC 2.4.1.-) (O-GlcNAc) (OGT), hypothetical start					Tetratricopeptide repeat Glycosyl transferase family 41
YALI0A19580g	6.27195	2.64891	4.03134e-17	9.08195e-16	UP		weakly similar to uniprot|P39109 Saccharomyces cerevisiae YDR135c YCF1 glutathione S-conjugate transporter (vacuolar)	YDR135C	YCF1	Vacuolar glutathione S-conjugate transporter of the ATP-binding cassette family, has a role in detoxifying metals such as cadmium, mercury, and arsenite; also transports unconjugated bilirubin; similar to human cystic fibrosis protein CFTR	SIMILAR TO	ABC transporter transmembrane region ABC transporter
YALI0B02544g	6.23368	2.64008	1.1373e-07	8.62206e-07	UP		similar to uniprot|Q04182 Saccharomyces cerevisiae YDR406w PDR15 ATP-binding cassette transporter family member	YDR406W	PDR15	Plasma membrane ATP binding cassette (ABC) transporter, multidrug transporter and general stress response factor implicated in cellular detoxification; regulated by Pdr1p, Pdr3p and Pdr8p; promoter contains a PDR responsive element		CDR ABC transporter ABC-2 type transporter ABC transporter
YALI0B00572g	6.2145	2.63564	9.35843e-22	3.19646e-20	UP		Methylenetetrahydrofolate reductase (EC 1.5.1.20)	YGL125W	MET13	Major isozyme of methylenetetrahydrofolate reductase, catalyzes the reduction of 5,10-methylenetetrahydrofolate to 5-methyltetrahydrofolate in the methionine biosynthesis pathway		Methylenetetrahydrofolate reductase	MET13	ketoconazole-induced; amphotericin B repressed
YALI0D23837g	6.21396	2.63551	0.0136974	0.0323614	UP		no similarity, hypothetical start
YALI0A03949g	6.21213	2.63509	2.42921e-05	0.000119457	UP		similar to uniprot|Q06593 Saccharomyces cerevisiae YPR194c oligopeptide transporter	YPR194C	OPT2	Oligopeptide transporter; member of the OPT family, with potential orthologs in S. pombe and C. albicans; also plays a role in formation of mature vacuoles	SIMILAR TO	OPT oligopeptide transporter protein
YALI0D23727g	6.21039	2.63468	2.14307e-18	5.44598e-17	UP		weakly similar to uniprot|P08640 Saccharomyces cerevisiae FLO11 MUC1 STA4 YIR019C GPI-anchored cell surface glycoprotein (flocculin)
YALI0E00330g	6.20639	2.63375	5.59628e-21	1.75139e-19	UP		no similarity, hypothetical start					Uncharacterized conserved protein (DUF2156)
YALI0F07689g	6.17266	2.62589	1.58953e-20	4.87839e-19	UP		no similarity, hypothetical start
YALI0F19162g	6.13947	2.61811	1.1914e-21	4.02606e-20	UP		no similarity, hypothetical start					ELMO/CED-12 family
YALI0C21912g	6.11932	2.61337	2.96325e-05	0.000142726	UP		similar to uniprot|Q6CIA4 Yarrowia lipolytica YALI0A00198g, start by similarity
YALI0B19162g	6.11019	2.61122	5.41794e-18	1.33931e-16	UP		similar to uniprot|O94021 Candida albicans Hypothetical 48.1 kDa protein, start by similarity					Aminotransferase class-V
YALI0C13244g	6.1093	2.61101	1.4525e-07	1.09075e-06	UP		no similarity, hypothetical start					F-box-like
YALI0A12705g	6.08615	2.60553	0.00221042	0.00652237	UP		similar to uniprot|Q9UST8 Schizosaccharomyces pombe Ribonuclease H	YMR234W	RNH1	Ribonuclease H1; able to bind double-stranded RNAs and RNA-DNA hybrids; associates with RNAse polymerase I; the homolog of mammalian RNAse HII (the S. cerevisiae homolog of mammalian RNAse HI is RNH201)		RNase H Caulimovirus viroplasmin
YALI0C08635g	6.08604	2.6055	1.27041e-22	4.66528e-21	UP		similar to uniprot|P87216 Schizosaccharomyces pombe VIP1 protein (P53 antigen homolog), start by similarity					RNA recognition motif (a.k.a. RRM, RBD, or RNP domain)	orf19.3932	Protein detected by mass spec in stationary phase culture; induced in core caspofungin response; increased expression observed in ssr1 homozygous null mutant; induced by nitric oxide in yhb1 mutant; induced by ketoconazole and by hypoxia
YALI0A21461g	6.08466	2.60518	2.19898e-21	7.16416e-20	UP		similar to uniprot|P36114 Saccharomyces cerevisiae YKR018c	YKR018C		Putative protein of unknown function; green fluorescent protein (GFP)-fusion protein localizes to the cytoplasm and nucleus	SIMILAR TO	Protein of unknown function (DUF3808)
YALI0B19866g	6.07009	2.60172	0.0123081	0.0294404	UP		no similarity, hypothetical start
YALI0D09735g	6.01166	2.58776	3.35941e-14	5.84722e-13	UP		weakly similar to uniprot|P87139 Schizosaccharomyces pombe Zinc finger protein, zf-C3HC4 type (RING finger), protease associated (PA) domain, hypothetical start					Ring finger domain PA domain
YALI0E22803g	6.00306	2.5857	5.11834e-18	1.27019e-16	UP		similar to uniprot|Q03730 Saccharomyces cerevisiae YML018c Putative protein of unknown function	YML018C		Putative protein of unknown function; green fluorescent protein (GFP)-fusion protein localizes to the membrane of the vacuole; physical interaction with Atg27p suggests a possible role in autophagy; YML018C is not an essential gene		Eukaryotic protein of unknown function (DUF914)	orf19.7427
YALI0E07557g	5.99538	2.58385	1.89273e-15	3.6885e-14	UP		weakly similar to uniprot|P08640 Saccharomyces cerevisiae YIR019c STA1 extracellular alpha-1, 4-glucan glucosidase, hypothetical start
YALI0E12683g	5.98764	2.58199	7.72829e-23	2.9052e-21	UP		highly similar to uniprot|P05694 Saccharomyces cerevisiae YER091c MET6 5- methyltetrahydropteroyltriglutamate--homocysteine methyltransferase	YER091C	MET6	Cobalamin-independent methionine synthase, involved in methionine biosynthesis and regeneration; requires a minimum of two glutamates on the methyltetrahydrofolate substrate, similar to bacterial metE homologs		Cobalamin-independent synthase, N-terminal domain Cobalamin-independent synthase, Catalytic domain
YALI0D06864g	5.98406	2.58113	1.7882e-06	1.09551e-05	UP		weakly similar to uniprot|Q03516 Saccharomyces cerevisiae YMR266w conserved protein	YMR266W	RSN1	Membrane protein of unknown function; overexpression suppresses NaCl sensitivity of sro7 mutant cells by restoring sodium pump (Ena1p) localization to the plasma membrane	SIMILAR TO	Phosphate metabolism protein Late exocytosis, associated with Golgi transport Domain of unknown function DUF221	SPO75	Similar to S. cerevisiae sporulation protein; fungal-specific (no human or murine homolog)
YALI0D26213g	5.96981	2.57769	7.09761e-14	1.18349e-12	UP		weakly similar to uniprot|Q96WJ8 Blumeria graminis Protein kinase C-like protein	YMR104C	YPK2	Protein kinase with similarity to serine/threonine protein kinase Ypk1p; functionally redundant with YPK1 at the genetic level; participates in a signaling pathway required for optimal cell wall integrity; homolog of mammalian kinase SGK	SIMILAR TO	Protein kinase domain
YALI0D20196g	5.95509	2.57412	4.45236e-08	3.62639e-07	UP		weakly similar to uniprot|P38358 Saccharomyces cerevisiae YBR293w similarity to multidrug resistance proteins	YKR105C	VBA5	Putative transporter of the Major Facilitator Superfamily (MFS); proposed role as a basic amino acid permease based on phylogeny	SIMILAR TO	Major Facilitator Superfamily
YALI0D06083g	5.95003	2.5729	4.17748e-12	5.83286e-11	UP		no similarity, hypothetical start					PI31 proteasome regulator
YALI0E04070g	5.94599	2.57192	9.88217e-10	1.05338e-08	UP		similar to DEHA0G18535g Debaryomyces hansenii, hypothetical start					non-haem dioxygenase in morphine synthesis N-terminal 2OG-Fe(II) oxygenase superfamily	orf19.1306
YALI0E21131g	5.93959	2.57036	7.11507e-20	2.09269e-18	UP		similar to uniprot|Q8NKG8 Kluyveromyces lactis Putative delta 8-sphingolipid desaturase, hypothetical start					Fatty acid desaturase Cytochrome b5-like Heme/Steroid binding domain	SLD1	Sphingolipid delta-8 desaturase, catalyzes desaturation at carbon-8 in the long-chain base moiety of ceramides during glucosylceramide synthesis, which is important for virulence; ketoconazole and hypoxia induced
YALI0C22924g	5.93815	2.57001	3.87238e-06	2.23242e-05	UP		weakly similar to uniprot|P08640 Saccharomyces cerevisiae YIR019c STA1 extracellular alpha-1, 4-glucan glucosidase, hypothetical start
YALI0F03432g	5.9253	2.56689	4.72854e-05	0.000216742	UP	ATG13	Autophagy-related protein 13	YPR185W	ATG13	Regulatory subunit of the Atg1p signaling complex; stimulates Atg1p kinase activity; required for vesicle formation during autophagy and the cytoplasm-to-vacuole targeting (Cvt) pathway; involved in Atg9p, Atg23p, and Atg27p cycling		Autophagy-related protein 13
YALI0B05434g	5.89865	2.56038	0.00761069	0.0193635	UP		no similarity, hypothetical start					Domain of unknown function (DUF3328)
YALI0E22506g	5.89193	2.55874	0.00029054	0.00107878	UP		similar to CA2778|CaMTR Candida albicans CaMTR neutral amino acid permease-like by homology, hypothetical start, hypothetical start					Transmembrane amino acid transporter protein	orf19.278
YALI0D00869g	5.88654	2.55742	1.36924e-05	7.11266e-05	UP		similar to uniprot|O59805 Schizosaccharomyces pombe Acetamidase	YDR242W	AMD2	Putative amidase	SIMILAR TO	Amidase
YALI0D26411g	5.88328	2.55662	0.00930815	0.0230635	UP		weakly similar to uniprot|Q884V4 Pseudomonas syringae Chemotaxis sensor histidine kinase CheA, hypothetical start
YALI0F18656g	5.87794	2.55531	2.18814e-19	6.23375e-18	UP		weakly similar to uniprot|O13912 Schizosaccharomyces pombe Hypothetical protein C23C11.06c	YNL115C		Putative protein of unknown function; green fluorescent protein (GFP)-fusion protein localizes to mitochondria; YNL115C is not an essential gene		Region of unknown function (DUF2417) Alpha/beta hydrolase family	orf19.1183
YALI0F00440g	5.86727	2.55269	1.25452e-05	6.57588e-05	UP		no similarity, hypothetical start
YALI0C06347g	5.85515	2.54971	6.97791e-19	1.89447e-17	UP	MON1	Vacuolar fusion protein MON1	YGL124C	MON1	Protein required for fusion of cvt-vesicles and autophagosomes with the vacuole; associates, as a complex with Ccz1p, with a perivacuolar compartment; potential Cdc28p substrate		Trafficking protein Mon1
YALI0D15334g	5.84097	2.54621	6.7508e-14	1.1346e-12	UP		some similarities with uniprot|Q9UUD1 Schizosaccharomyces pombe Putative DNA-binding protein		SRE1			Helix-loop-helix DNA-binding domain Domain of unknown function (DUF2014)	CPH2	Myc-bHLH family transcriptional activator of hyphal growth; directly regulates Tec1p, which regulates hypha-specific genes; probably homodimeric, phosphorylated; required for wild-type levels of Candida colonization of the mouse GI tract
YALI0B09999g	5.8329	2.54421	9.588e-14	1.56186e-12	UP		weakly similar to uniprot|Q8ES18 Oceanobacillus iheyensis 2-nitropropane dioxygenase, hypothetical start					Nitronate monooxygenase
YALI0C07634g	5.83103	2.54375	0.00927533	0.0229911	UP		no similarity, hypothetical start
YALI0E03916g	5.8295	2.54337	4.11783e-12	5.76224e-11	UP		no similarity, possibly noncoding, hypothetical start
YALI0F05852g	5.82307	2.54178	9.12261e-12	1.23573e-10	UP		some similarities to uniprot|Q98S43 Guillardia theta AMP-activated protein kinase, beta 2 non-catalytic SU and other 5'-AMP-activated protein kinases, beta subunits, hypothetical start
YALI0B05654g	5.81543	2.53989	5.69367e-09	5.39074e-08	UP	AXP1	Acid extracellular protease (EC 3.4.23.-)	YLR121C	YPS3	Aspartic protease, attached to the plasma membrane via a glycosylphosphatidylinositol (GPI) anchor	SIMILAR TO	Eukaryotic aspartyl protease
YALI0E04598g	5.80585	2.53751	3.46557e-20	1.04842e-18	UP		no similarity, hypothetical start
YALI0C19822g	5.79629	2.53513	0.0204813	0.045816	UP		no similarity, hypothetical start
YALI0E18238g	5.78329	2.53189	1.22828e-14	2.21684e-13	UP		similar to uniprot|P17649 Saccharomyces cerevisiae YGR019w UGA1 4-aminobutyrate aminotransferase (GABA transaminase)	YGR019W	UGA1	Gamma-aminobutyrate (GABA) transaminase (4-aminobutyrate aminotransferase) involved in the 4-aminobutyrate and glutamate degradation pathways; required for normal oxidative stress tolerance and nitrogen utilization		Aminotransferase class-III	UGA1	Protein described as GABA transaminase; transcription regulated by Mig1p and Tup1p; protein detected by mass spec in stationary phase cultures
YALI0A00979g	5.77963	2.53098	8.74538e-19	2.33443e-17	UP		similar to uniprot|P34240 Saccharomyces cerevisiae YKL175w ZRT3 vacuolar membrane protein involved in the regulation of zinc storage	YKL175W	ZRT3	Vacuolar membrane zinc transporter, transports zinc from storage in the vacuole to the cytoplasm when needed; transcription is induced under conditions of zinc deficiency		ZIP Zinc transporter	orf19.1534	Protein similar to S. cerevisiae Zrt3p, which is a transporter of zinc ions; predicted Kex2p substrate
YALI0E08382g	5.77609	2.53009	3.94032e-14	6.8024e-13	UP		no similarity, hypothetical start
YALI0C07326g	5.77031	2.52865	9.02065e-18	2.18734e-16	UP		weakly similar to uniprot|O14249 Schizosaccharomyces pombe Hypothetical protein C6G10.03c in chromosome I	YGR110W	CLD1	Mitochondrial cardiolipin-specific phospholipase; functions upstream of Taz1p to generate monolyso-cardiolipin; transcription increases upon genotoxic stress; involved in restricting Ty1 transposition; has homology to mammalian CGI-58	SIMILAR TO	Alpha/beta hydrolase family
YALI0E04510g	5.75912	2.52585	0.00015322	0.000612589	UP		similar to uniprot|Q9URL7 Candida albicans PTR2 Peptide transport protein	YKR093W	PTR2	Integral membrane peptide transporter, mediates transport of di- and tri-peptides; conserved protein that contains 12 transmembrane domains; PTR2 expression is regulated by the N-end rule pathway via repression by Cup9p	SIMILAR TO	POT family
YALI0F25509g	5.73755	2.52043	6.24557e-22	2.14476e-20	UP		no similarity, hypothetical start					Mitochondrial inner membrane protein
YALI0F19140g	5.73454	2.51968	1.09148e-11	1.45676e-10	UP		no similarity, hypothetical start					Methyltransferase domain
YALI0C06930g	5.7302	2.51858	2.35677e-18	5.9415e-17	UP		weakly similar to uniprot|Q96VT0 Agrocybe pediades Phytase precursor (strong similarity to acid phosphatase)	YDL024C	DIA3	Protein of unknown function, involved in invasive and pseudohyphal growth		Histidine phosphatase superfamily (branch 2)
YALI0B02409g	5.70986	2.51346	8.98968e-19	2.3896e-17	UP		no similarity, identified in cDNA
YALI0A00660g	5.70371	2.5119	2.36721e-06	1.41609e-05	UP		weakly similar to uniprot|Q12218 Saccharomyces cerevisiae YOR009w, hypothetical start
YALI0A14454g	5.69681	2.51015	3.197e-19	8.98697e-18	UP		weakly similar to wi|NCU07869.1 Neurospora crassa NCU07869.1 predicted protein, hypothetical start					Insulin-induced protein (INSIG)	orf19.273
YALI0C16797g	5.65891	2.50052	4.50328e-19	1.24932e-17	UP		similar to uniprot|Q96VP9 Glomus intraradices Probable acyl-CoA dehydrogenase	YML054C	CYB2	Cytochrome b2 (L-lactate cytochrome-c oxidoreductase), component of the mitochondrial intermembrane space, required for lactate utilization; expression is repressed by glucose and anaerobic conditions	SIMILAR TO	Cytochrome b5-like Heme/Steroid binding domain Acyl-CoA dehydrogenase, N-terminal domain Acyl-CoA dehydrogenase, middle domain Acyl-CoA dehydrogenase, C-terminal domain
YALI0C06644g	5.58184	2.48074	3.96258e-13	6.14007e-12	UP		similar to ca|CA0882|CaPHR3 Candida albicans surface glycoprotein (by homology)	YOL132W	GAS4	1,3-beta-glucanosyltransferase, involved with Gas2p in spore wall assembly; has similarity to Gas1p; localizes to the cell wall		Glucanosyltransferase	PHR3	Putative beta-1,3-glucanosyltransferase with similarity to the A. fumigatus GEL family; fungal-specific (no human or murine homolog); possibly an essential gene, disruptants not obtained by UAU1 method
YALI0C20097g	5.57232	2.47828	1.4629e-16	3.12922e-15	UP		no similarity, hypothetical start
YALI0F06094g	5.57225	2.47826	0.00338882	0.00953884	UP		no similarity, hypothetical start					Kelch motif Galactose oxidase, central domain
YALI0A14564g	5.56993	2.47766	0.000956733	0.00312179	UP		no similarity, hypothetical start
YALI0C06171g	5.5688	2.47737	1.65193e-19	4.79212e-18	UP		similar to uniprot|Q884Q9 Pseudomonas syringae Oxidoreductase zinc-binding	YML131W		Putative protein of unknown function with similarity to medium chain dehydrogenase/reductases; expression induced by stresses including osmotic shock, DNA damaging agents, and other chemicals; GFP-fusion protein localizes to the cytoplasm		Zinc-binding dehydrogenase	orf19.3139	increased transcription is observed upon benomyl treatment; oxidative stress-induced via Cap1p
YALI0E11825g	5.53089	2.46751	1.04031e-17	2.51296e-16	UP		similar to uniprot|P32854 Saccharomyces cerevisiae YOR036w PEP12 syntaxin	YOR036W	PEP12	Target membrane receptor (t-SNARE) for vesicular intermediates traveling between the Golgi apparatus and the vacuole; controls entry of biosynthetic, endocytic, and retrograde traffic into the prevacuolar compartment; syntaxin	SIMILAR TO	SNARE domain	VAM3	Predicted target membrane receptor (t-SNARE) involved in vacuolar transport, endocytosis, and secretion; required for biofilm formation and virulence
YALI0C07612g	5.51432	2.46318	4.28135e-21	1.35997e-19	UP		no similarity, hypothetical start
YALI0F27071g	5.50825	2.46159	1.24047e-19	3.61499e-18	UP		similar to uniprot|O14413 Pichia angusta proteinase A and uniprot|P07267 Saccharomyces cerevisiae YPL154c PEP4 aspartyl protease	YPL154C	PEP4	Vacuolar aspartyl protease (proteinase A), required for the posttranslational precursor maturation of vacuolar proteinases; important for protein turnover after oxidative damage; synthesized as a zymogen, self-activates		Eukaryotic aspartyl protease	orf19.1891	Vacuolar aspartic proteinase; mRNA abundance is equivalent in yeast-form and mycelial cells but is elevated at lower growth temperatures; upregulated in the presence of human neutrophils; detected by mass spec in stationary phase cultures
YALI0F16918g	5.48384	2.45519	2.39173e-11	3.07584e-10	UP		weakly similar to uniprot|P53304 Saccharomyces cerevisiae YGR212w SLI1 N-acetyltransferase, confers resistance to the sphingolipid biosynthesis inhibitor myriocin, start by similarity					Alcohol acetyltransferase
YALI0D05929g	5.46515	2.45026	9.92233e-13	1.48321e-11	UP		similar to uniprot|P38004 Chlamydia trachomatis 3- oxoacyl-[acyl-carrier protein] reductase	YDL114W		Putative protein of unknown function with similarity to acyl-carrier-protein reductases; YDL114W is not an essential gene	SIMILAR TO	short chain dehydrogenase
YALI0F10541g	5.46196	2.44942	8.30272e-13	1.25888e-11	UP		similar to uniprot|P41910 Saccharomyces cerevisiae YDR005c MAF1 required for sorting of MOD5P, start by similarity					Maf1 regulator	MAF1	Protein described as affecting nucleocytoplasmic transport and synthesis of RNA Polymerase III; decreased expression in hyphae compared to yeast-form cells; caspofungin repressed
YALI0F26081g	5.46162	2.44933	1.90664e-10	2.24313e-09	UP		some similarities with uniprot|O94317 Schizosaccharomyces pombe Uncharacterized serine-rich protein
YALI0D11308g	5.45854	2.44852	1.5022e-10	1.78717e-09	UP		ATP-dependent (S)-NAD(P)H-hydrate dehydratase (EC 4.2.1.93) (ATP-dependent NAD(P)HX dehydratase)	YKL151C		Putative protein of unknown function; YKL151C promoter contains STREs (stress response elements) and expression is induced by heat shock or methyl methanesulfonate; green fluorescent protein (GFP)-fusion protein localizes to the cytoplasm		Carbohydrate kinase	orf19.3508	protein detected by mass spec in stationary phase cultures
YALI0B08800g	5.45573	2.44777	6.91841e-05	0.000303804	UP		no similarity, hypothetical start
YALI0F12463g	5.44486	2.44489	4.59055e-19	1.26799e-17	UP		similar to uniprot|P33416 Saccharomyces cerevisiae YDR258c	YDR258C	HSP78	Oligomeric mitochondrial matrix chaperone that cooperates with Ssc1p in mitochondrial thermotolerance after heat shock; able to prevent the aggregation of misfolded proteins as well as resolubilize protein aggregates		C-terminal, D2-small domain, of ClpB protein ATPase family associated with various cellular activities (AAA) AAA domain (Cdc48 subfamily)	HSP78	Putative heat-shock protein; transcriptionally regulated by macrophage response; transcription is regulated by Nrg1p, Mig1p, Gcn2p, Gcn4p, Mnl1p; heavy metal (cadmium) stress-induced
YALI0F08415g	5.43709	2.44284	3.50464e-13	5.47051e-12	UP		similar to wi|NCU00678.1 Neurospora crassa and uniprot|Q04792 Saccharomyces cerevisiae YMR250w	YMR250W	GAD1	Glutamate decarboxylase, converts glutamate into gamma-aminobutyric acid (GABA) during glutamate catabolism; involved in response to oxidative stress		Pyridoxal-dependent decarboxylase conserved domain	GAD1	Protein described as glutamate decarboxylase; macrophage-downregulated gene; alkaline downregulated; amphotericin B induced; transcriptionally activated by Mnl1p under weak acid stress
YALI0C10010g	5.42175	2.43876	8.97315e-09	8.14378e-08	UP		weakly similar to uniprot|Q9I1Z7 Pseudomonas aeruginosa O6-methylguanine-DNA methyltransferase, hypothetical start					Metal binding domain of Ada Bacterial regulatory helix-turn-helix proteins, AraC family	orf19.211
YALI0E05577g	5.41772	2.43768	0.00747143	0.0191087	UP		highly similar to uniprot|Q6C1S5 Yarrowia lipolytica YALI0F13761g, start by similarity
YALI0C21538g	5.41417	2.43674	3.43636e-10	3.89843e-09	UP		some similarities with wi|NCU08273.1 Neurospora crassa NCU08273.1 hypothetical protein 5' end	YBR086C	IST2	Plasma membrane protein that may be involved in osmotolerance, localizes to the mother cell in small-budded cells and to the bud in medium- and large-budded cells; mRNA is transported to the bud tip by an actomyosin-driven process		Calcium-activated chloride channel	IST2
YALI0C10142g	5.40682	2.43478	6.69108e-18	1.64761e-16	UP		no similarity, hypothetical start
YALI0E08206g	5.40303	2.43377	3.7361e-17	8.50733e-16	UP		weakly similar to uniprot|P47139 Saccharomyces cerevisiae YJR098c	YJR098C		Putative protein of unknown function; the authentic, non-tagged protein is detected in highly purified mitochondria in high-throughput studies		Lecithin:cholesterol acyltransferase
YALI0B10153g	5.33583	2.41571	5.07895e-21	1.59736e-19	UP		similar to uniprot|Q9HF05 Emericella nidulans Oleate delta-12 desaturase, hypothetical start					Fatty acid desaturase	FAD2	Delta-12 fatty acid desaturase, involved in production of linoleic acid, which is a major component of membranes
YALI0C12100g	5.32027	2.4115	4.64488e-19	1.27744e-17	UP		similar to DEHA0C00484g Debaryomyces hansenii IPF 2562.1, hypothetical start					Transmembrane amino acid transporter protein
YALI0E19558g	5.29735	2.40527	7.2505e-19	1.9601e-17	UP		weakly similar to uniprot|P25639 Saccharomyces cerevisiae YCR061w	YCR061W		Protein of unknown function; green fluorescent protein (GFP)-fusion protein localizes to the cytoplasm in a punctate pattern; induced by treatment with 8-methoxypsoralen and UVA irradiation		Protein of unknown function (Ytp1) Domain of unknown function (DUF2427)	orf19.4907	increased transcription is observed upon fluphenazine treatment; possibly transcriptionally regulated by Tac1p; induced by nitric oxide; fungal-specific (no human or murine homolog)
YALI0C13420g	5.27618	2.39949	8.7066e-06	4.71552e-05	UP		weakly similar to uniprot|P38835 Saccharomyces cerevisiae YHR131c, hypothetical start
YALI0D15114g	5.24112	2.38988	1.02396e-18	2.67705e-17	UP		similar to uniprot|Q96UC2 Neurospora crassa Conserved hypothetical protein	YDR109C		Putative kinase		FGGY family of carbohydrate kinases, N-terminal domain FGGY family of carbohydrate kinases, C-terminal domain	orf19.2737
YALI0C01133g	5.19957	2.37839	1.55896e-16	3.32352e-15	UP		Probable zinc metalloprotease YALI0C01133g (EC 3.4.-.-)	YBR074W		Putative metalloprotease		Peptidase family M28	orf19.2163
YALI0D23177g	5.17418	2.37133	2.92321e-08	2.45326e-07	UP		no similarity, hypothetical start
YALI0E19030g	5.14629	2.36353	2.40046e-05	0.000118402	UP		no similarity, hypothetical start
YALI0F12287g	5.12693	2.35809	1.44276e-17	3.4201e-16	UP		some similarities with DEHA0F16368g Debaryomyces hansenii, hypothetical start						orf19.3643
YALI0C15026g	5.10595	2.35218	4.33694e-08	3.53892e-07	UP		some similarities with uniprot|Q54300 Streptomyces hygroscopicus Methyltransferase, hypothetical start					Methyltransferase domain
YALI0D18634g	5.09705	2.34966	5.41444e-09	5.15711e-08	UP		some similarities with uniprot|P32583 Saccharomyces cerevisiae SRP40 YKR092C Nucleolar, serine-rich protein with a role in preribosome assembly or transport
YALI0A04191g	5.06415	2.34032	4.50343e-10	5.01056e-09	UP		weakly similar to uniprot|Q6C7S2 Yarrowia lipolytica YALI0D25806g, hypothetical start
YALI0A10747g	5.06227	2.33978	1.30691e-17	3.145e-16	UP		weakly similar to CAGL0H02101g Candida glabrata, start by similarity					Shwachman-Bodian-Diamond syndrome (SBDS) protein
YALI0F22099g	5.05744	2.33841	3.32191e-06	1.93972e-05	UP		no similarity, hypothetical start					Protein of unknown function (DUF2722)
YALI0F16511g	5.05464	2.33761	5.75145e-07	3.83812e-06	UP		some similarities with DEHA0E11308g Debaryomyces hansenii IPF 12024.1	YIL101C	XBP1	Transcriptional repressor that binds to promoter sequences of the cyclin genes, CYS3, and SMF2; expression is induced by stress or starvation during mitosis, and late in meiosis; member of the Swi4p/Mbp1p family; potential Cdc28p substrate			orf19.5210	possibly an essential gene, disruptants not obtained by UAU1 method
YALI0C11836g	5.05017	2.33633	0.00193585	0.00578751	UP		highly similar to uniprot|Q6CC74 Yarrowia lipolytica YALI0C11825g, hypothetical start
YALI0B08206g	5.0382	2.33291	1.89297e-06	1.15524e-05	UP	CRF1	Copper resistance protein CRF1 (YlCRF1)	YPR008W	HAA1	Transcriptional activator involved in the transcription of TPO2, YRO2, and other genes putatively encoding membrane stress proteins; involved in adaptation to weak acid stress		Copper fist DNA binding domain	CUP2	Protein required for normal resistance to copper; similar to S. cerevisiae Cup2p, which is a copper-binding transcription factor that activates transcription of metallothionein genes
YALI0D10725g	5.02738	2.32981	0.000127077	0.000522874	UP		no similarity, hypothetical start
YALI0C11825g	5.02272	2.32847	4.63725e-18	1.15531e-16	UP		some similarities with uniprot|Q6CC73 Yarrowia lipolytica YALI0C11836g, hypothetical start					Methyltransferase domain
YALI0F32065g	5.01267	2.32558	9.65763e-19	2.54585e-17	UP		no similarity, hypothetical start
YALI0E11737g	4.99433	2.32029	2.4528e-15	4.73636e-14	UP		no similarity, hypothetical start
YALI0B08140g	4.92683	2.30066	3.50379e-12	4.95759e-11	UP		similar to uniprot|P18408 Saccharomyces cerevisiae YPR167c MET16 Phosphoadenosine phosphosulfate reductase (EC 1.8.4.8) (PAPS reductase thioredoxin dependent) (PAdoPS reductase) (3 - phosphoadenylylsulfate reductase)	YPR167C	MET16	3'-phosphoadenylsulfate reductase, reduces 3'-phosphoadenylyl sulfate to adenosine-3',5'-bisphosphate and free sulfite using reduced thioredoxin as cosubstrate, involved in sulfate assimilation and methionine metabolism		Phosphoadenosine phosphosulfate reductase family	MET16	Putative 3'-phosphoadenylsulfate reductase; sulfur amino acid metabolism; reports differ on regulation during biofilm formation; fungal-specific (no human/murine homolog); possibly an essential gene, disruptants not obtained by UAU1 method
YALI0E11561g	4.92521	2.30019	0.000584557	0.00202051	UP		similar to uniprot|CAD70713 Yarrowia lipolytica lipase LIP4	YJR107W		Putative protein of unknown function; has sequence or structural similarity to lipases	SIMILAR TO	Lipase (class 3)
YALI0C22792g	4.89026	2.28991	7.96957e-10	8.64005e-09	UP		Amine oxidase					Copper amine oxidase, N3 domain Copper amine oxidase, N2 domain Copper amine oxidase, enzyme domain	AMO1
YALI0E32703g	4.89008	2.28986	5.82205e-17	1.28876e-15	UP	SIL1	Nucleotide exchange factor SIL1 (Protein SLS1)	YOL031C	SIL1	Nucleotide exchange factor for the endoplasmic reticulum (ER) lumenal Hsp70 chaperone Kar2p, required for protein translocation into the ER; homolog of Yarrowia lipolytica SLS1; GrpE-like protein
YALI0F28567g	4.88371	2.28798	2.00362e-09	2.03015e-08	UP		weakly similar to uniprot|Q9P3G4 Neurospora crassa conserved hypothetical protein, hypothetical start					Enoyl-CoA hydratase/isomerase family
YALI0D25014g	4.86127	2.28133	2.86287e-06	1.69189e-05	UP		weakly similar to uniprot|Q97P71 Streptococcus pneumoniae Cell wall surface anchor family protein, hypothetical start
YALI0D23947g	4.84206	2.27562	3.31959e-13	5.19442e-12	UP		some similarities with uniprot|P25386 Saccharomyces cerevisiae YDL058w USO1 intracellular protein transport protein, hypothetical start								NIPSNAP
YALI0A09064g	4.82008	2.26906	1.76593e-15	3.47336e-14	UP		similar to uniprot|Q12116 Saccharomyces cerevisiae YDR105c	YDR105C	TMS1	Vacuolar membrane protein of unknown function that is conserved in mammals; predicted to contain eleven transmembrane helices; interacts with Pdr5p, a protein involved in multidrug resistance		Serine incorporator (Serinc)	orf19.3758
YALI0B06710g	4.81955	2.2689	0.00347394	0.0097482	UP		some similarities with uniprot|Q9UVF6 Yarrowia lipolytica Pal2 protein and to palH Emericella nidulans, hypothetical start					PalH/RIM21
YALI0F27731g	4.81284	2.26689	1.41041e-16	3.02715e-15	UP		no similarity, hypothetical start
YALI0F28479g	4.78316	2.25796	3.97775e-09	3.86993e-08	UP		no similarity, possibly noncoding, hypothetical start
YALI0A14256g	4.77855	2.25657	0.0090642	0.0225463	UP		no similarity, hypothetical start
YALI0D00319g	4.77655	2.25597	2.10358e-17	4.87738e-16	UP		some similarities with uniprot|Q08269 Saccharomyces cerevisiae YOL130w ALR1 divalent cation transporter	YFL050C	ALR2	Probable Mg(2+) transporter; overexpression confers increased tolerance to Al(3+) and Ga(3+) ions; plays a role in regulating Ty1 transposition		CorA-like Mg2+ transporter protein	ALR1	Putative transporter of divalent cations; hyphal-induced expression; fungal-specific (no human or murine homolog)
YALI0F27247g	4.77335	2.255	3.44012e-17	7.86154e-16	UP	COQ4	Ubiquinone biosynthesis protein COQ4, mitochondrial (Coenzyme Q biosynthesis protein 4)	YDR204W	COQ4	Protein with a role in ubiquinone (Coenzyme Q) biosynthesis, possibly functioning in stabilization of Coq7p; located on the matrix face of the mitochondrial inner membrane; component of a mitochondrial ubiquinone-synthesizing complex		Coenzyme Q (ubiquinone) biosynthesis protein Coq4	COQ4	Protein described as having role in coenzyme Q biosynthesis; transcriptionally induced by interaction with macrophage
YALI0E17611g	4.77262	2.25478	2.67041e-06	1.58553e-05	UP		weakly similar to uniprot|O43119 Aspergillus niger Peptide-N4-(N-acetyl-beta-D-glucosaminyl) asparaginase amidase N, hypothetical start					Peptide N-acetyl-beta-D-glucosaminyl asparaginase amidase A	PNG2	Putative peptide:N-glycanase; gene contains highly variable numbers of 12-bp repeats; transcription is upregulated under treatment with caspofungin, ciclopirox olamine, ketoconazole or hypoxia; gene of core caspofungin response
YALI0A17776g	4.77192	2.25457	1.7923e-07	1.31636e-06	UP		no similarity, hypothetical start
YALI0F26917g	4.71822	2.23824	4.30522e-16	8.90915e-15	UP		similar to DEHA0F11385g Debaryomyces hansenii, start by similarity					Fungal protein of unknown function (DUF1774)	orf19.1152	regulated by Gcn2p and Gcn4p; induced in core stress response
YALI0C12980g	4.71588	2.23753	1.21676e-09	1.2777e-08	UP		weakly similar to uniprot|Q12303 Saccharomyces cerevisiae YLR121c YPS3 GPI-anchored aspartyl protease 3 (yapsin 3)	YLR121C	YPS3	Aspartic protease, attached to the plasma membrane via a glycosylphosphatidylinositol (GPI) anchor	SIMILAR TO	Eukaryotic aspartyl protease
YALI0D06952g	4.71148	2.23618	5.63769e-17	1.25232e-15	UP		weakly similar to DEHA0G06963g Debaryomyces hansenii IPF 4466.1 and KLLA0E19701g Kluyveromyces lactis IPF 2215.1, start by similarity					Fungal Zn(2)-Cys(6) binuclear cluster domain Fungal specific transcription factor domain
YALI0A19426g	4.70469	2.2341	6.75314e-18	1.65648e-16	UP		similar to uniprot|P34227 Saccharomyces cerevisiae YBL064c strong similarity to thiol-specific antioxidant enzyme	YBL064C	PRX1	Mitochondrial peroxiredoxin (1-Cys Prx) with thioredoxin peroxidase activity, has a role in reduction of hydroperoxides; reactivation requires Trr2p and glutathione; induced during respiratory growth and oxidative stress; phosphorylated	SIMILAR TO	C-terminal domain of 1-Cys peroxiredoxin AhpC/TSA family	PRX1	Protein described as a putative cysteine peroxidase; transcriptionally induced by interaction with macrophage; fluconazole induced; Fkh2p-downregulated; caspofungin repressed
YALI0D05401g	4.70325	2.23366	0.00263326	0.007618	UP		weakly similar to uniprot|P38724 Saccharomyces cerevisiae YHL047c TAF1 siderophore transporter for triacetylfusarinine C	YHL047C	ARN2	Transporter, member of the ARN family of transporters that specifically recognize siderophore-iron chelates; responsible for uptake of iron bound to the siderophore triacetylfusarinine C	SIMILAR TO	Major Facilitator Superfamily
YALI0A04895g	4.67674	2.2255	5.14445e-17	1.14676e-15	UP	NPC2	Phosphatidylglycerol/phosphatidylinositol transfer protein (PG/PI-TP)	YDL046W	NPC2	Functional homolog of human NPC2/He1, which is a cholesterol-binding protein whose deficiency causes Niemann-Pick type C2 disease involving retention of cholesterol in lysosomes		ML domain	orf19.3226
YALI0A06347g	4.6714	2.22385	6.19757e-09	5.80725e-08	UP		no similarity, hypothetical start					BTB/POZ domain
YALI0B10846g	4.65081	2.21748	2.23387e-05	0.000111155	UP		similar to uniprot|P36033 Saccharomyces cerevisiae YKL220c FRE2 ferric (and cupric) reductase	YKL220C	FRE2	Ferric reductase and cupric reductase, reduces siderophore-bound iron and oxidized copper prior to uptake by transporters; expression induced by low iron levels but not by low copper levels		Ferric reductase NAD binding domain Ferric reductase like transmembrane component FAD-binding domain
YALI0E11715g	4.64244	2.21488	0.000390108	0.00139941	UP		weakly similar to uniprot|P12630 Saccharomyces cerevisiae YIL015w BAR1 Barrierpepsin precursor	YIL015W	BAR1	Aspartyl protease secreted into the periplasmic space of mating type a cells, helps cells find mating partners, cleaves and inactivates alpha factor allowing cells to recover from alpha-factor-induced cell cycle arrest	SIMILAR TO	Eukaryotic aspartyl protease
YALI0F23507g	4.63871	2.21372	3.94616e-11	4.93503e-10	UP		some similarities with uniprot|Q9P3E0 Neurospora crassa Conserved hypothetical protein, hypothetical start					Plasma-membrane choline transporter
YALI0F20020g	4.61532	2.20643	8.54637e-15	1.57835e-13	UP		some similarities with uniprot|Q873L5 Neurospora crassa B18E6.100, unknown function, hypothetical start					Mechanosensitive ion channel
YALI0C12276g	4.61383	2.20596	8.6462e-17	1.88761e-15	UP		some similarities with uniprot|P53230 Saccharomyces cerevisiae YGR046w similarity to proline transport helper PTH1 C. albicans	YGR046W	TAM41	Mitochondrial protein involved in protein import into the mitochondrial matrix; maintains the functional integrity of the TIM23 protein translocator complex; viability of null mutant is strain-dependent; mRNA is targeted to the bud		Mitochondrial matrix Mmp37	PTH1	Putative gluconate transport protein; antigenic during human oral infection; possibly an essential gene, disruptants not obtained by UAU1 method
YALI0F06358g	4.60094	2.20193	1.05054e-06	6.7381e-06	UP	ATG15	Putative lipase ATG15 (EC 3.1.1.3) (Autophagy-related protein 15)	YCR068W	ATG15	Lipase required for intravacuolar lysis of autophagic bodies and Cvt bodies; targeted to intravacuolar vesicles during autophagy via the multivesicular body (MVB) pathway		Lipase (class 3)	ATG15	Putative lipase; fungal-specific (no human or murine homolog)
YALI0E21043g	4.60001	2.20164	6.11435e-12	8.38973e-11	UP		similar to uniprot|Q08967 Saccharomyces cerevisiae YPL221W bop1	YPL221W	FLC1	Putative FAD transporter; required for uptake of FAD into endoplasmic reticulum; involved in cell wall maintenance		Transient receptor potential (TRP) ion channel
YALI0B13948g	4.59768	2.20091	0.000129499	0.00053058	UP		no similarity, hypothetical start
YALI0B05280g	4.58957	2.19836	6.35136e-09	5.94259e-08	UP		similar to uniprot|O74710 Emericella nidulans Hypothetical 30.8 kDa protein	YNL305C		Putative protein of unknown function; green fluorescent protein (GFP)-fusion protein localizes to the vacuole; YNL305C is not an essential gene		Inhibitor of apoptosis-promoting Bax1
YALI0F22517g	4.58912	2.19822	5.52308e-09	5.24486e-08	UP		similar to uniprot|P78594 Candida albicans FCY1 Cytosine deaminase (Cytosine aminohydrolase)	YPR062W	FCY1	Cytosine deaminase, zinc metalloenzyme that catalyzes the hydrolytic deamination of cytosine to uracil; of biomedical interest because it also catalyzes the deamination of 5-fluorocytosine (5FC) to form anticancer drug 5-fluorouracil (5FU)		Cytidine and deoxycytidylate deaminase zinc-binding region	FCA1	Cytosine deaminase; enzyme of pyrimidine salvage; functional homolog of S. cerevisiae Fcy1p; mutation is associated with resistance to flucytosine (5-FC) in a clinical isolate; hyphal downregulated; gene has intron
YALI0F30327g	4.58357	2.19647	3.75515e-08	3.08299e-07	UP		some similarities with uniprot|P38818 Saccharomyces cerevisiae YHR109w CTM1 cytochrome c methyltransferase, hypothetical start					SET domain
YALI0E09581g	4.58293	2.19627	6.91799e-05	0.000303804	UP		weakly similar to DEHA0F11682g Debaryomyces hansenii, hypothetical start
YALI0B14795g	4.5803	2.19544	1.72736e-06	1.06028e-05	UP		some similarities with uniprot|P40552 Saccharomyces cerevisiae YIL011W TIR3 (ohnolog of YER011W) Cell wall mannoprotein of the Srp1p/Tip1p family of serine-alanine-rich proteins, hypothetical start
YALI0B11418g	4.5785	2.19487	4.99845e-16	1.02768e-14	UP		similar to uniprot|P40566 Saccharomyces cerevisiae YIR007w hypothetical protein	YIR007W		Putative protein of unknown function; green fluorescent protein (GFP)-fusion protein localizes to the cytoplasm; YIR007W is a non-essential gene	SIMILAR TO	Cellulase (glycosyl hydrolase family 5)	orf19.4031
YALI0F31867g	4.57816	2.19477	9.97504e-16	1.9991e-14	UP		weakly similar to uniprot|Q9I5L7 Pseudomonas aeruginosa Hypothetical protein PA0711, hypothetical start					Acetyltransferase (GNAT) family
YALI0D23749g	4.56274	2.1899	3.69759e-07	2.57575e-06	UP		weakly similar to uniprot|P47043 Saccharomyces cerevisiae YJL056c ZAP1 metalloregulatory protein involved in zinc-responsive transcriptional regulation	YJL056C	ZAP1	Zinc-regulated transcription factor; binds to zinc-responsive promoters to induce transcription of certain genes in presence of zinc, represses other genes in low zinc; regulates its own transcription; contains seven zinc-finger domains		Zinc-finger double domain	CSR1	Putative zinc-finger transcription factor involved in zinc homeostasis; involved in negative regulation of biofilm matrix; similar to S. cerevisiae Zap1p; mutation affects filamentous growth; suppresses S. cerevisiae rok1 mutant inviability
YALI0F25113g	4.56221	2.18973	2.91716e-13	4.5873e-12	UP		weakly similar to uniprot|Q98A31 Rhizobium loti transcriptional regulator, start by similarity					Putative FMN-binding domain	orf19.7098	repressed by nitric oxide
YALI0D06688g	4.56139	2.18947	1.37159e-17	3.26356e-16	UP		similar to uniprot|P40088 Saccharomyces cerevisiae YER145c FTR1 iron permease that mediates high-affinity iron uptake	YER145C	FTR1	High affinity iron permease involved in the transport of iron across the plasma membrane; forms complex with Fet3p; expression is regulated by iron	SIMILAR TO	Iron permease FTR1 family
YALI0D15510g	4.56054	2.1892	2.1165e-08	1.83941e-07	UP		weakly similar to uniprot|Q06651 Saccharomyces cerevisiae YDR313c PIB1 phosphatidylinositol(3)-phosphate binding protein	YDR313C	PIB1	RING-type ubiquitin ligase of the endosomal and vacuolar membranes, binds phosphatidylinositol(3)-phosphate; contains a FYVE finger domain		Ring finger domain FYVE zinc finger
YALI0E24937g	4.546	2.1846	3.4938e-07	2.4472e-06	UP		some similarities with uniprot|P38704 Saccharomyces cerevisiae YHR006w SPT2 involved in pre-tRNA splicing	YHR006W	STP2	Transcription factor, activated by proteolytic processing in response to signals from the SPS sensor system for external amino acids; activates transcription of amino acid permease genes		Zinc-finger double domain	STP2	Transcription factor; activates transcription of genes encoding amino acid permeases; activated via amino-acid-induced proteolytic processing (Ssy1p and Csh3p dependent); also amino-acid-regulated
YALI0F10549g	4.53957	2.18256	0.000289833	0.00107679	UP		weakly similar to uniprot|Q12303 Saccharomyces cerevisiae Putative aspartyl protease YLR121C precursor	YLR121C	YPS3	Aspartic protease, attached to the plasma membrane via a glycosylphosphatidylinositol (GPI) anchor	SIMILAR TO	Eukaryotic aspartyl protease	SAP6	Secreted aspartyl proteinase; expressed during hyphal growth, oral carriage, infection; sap4 sap5 sap6 triple mutant is defective in protein utilization as N source; assessment of virulence role complicated by URA3 effects
YALI0F02981g	4.51724	2.17544	6.82786e-14	1.14452e-12	UP		uniprot|Q7ZA17 Yarrowia lipolytica Hrd1 protein weakly similar to uniprot|Q08109 Saccharomyces cerevisiae YOL013c HRD1 involved in degradation of HMG2P	YOL013C	HRD1	Ubiquitin-protein ligase required for endoplasmic reticulum-associated degradation (ERAD) of misfolded proteins; genetically linked to the unfolded protein response (UPR); regulated through association with Hrd3p; contains an H2 ring finger		Ring finger domain
YALI0B02852g	4.51668	2.17526	1.88522e-14	3.36427e-13	UP	BNA1	3-hydroxyanthranilate 3,4-dioxygenase (EC 1.13.11.6) (3-hydroxyanthranilate oxygenase) (3-HAO) (3-hydroxyanthranilic acid dioxygenase) (HAD) (Biosynthesis of nicotinic acid protein 1)	YJR025C	BNA1	3-hydroxyanthranilic acid dioxygenase, required for the de novo biosynthesis of NAD from tryptophan via kynurenine; expression regulated by Hst1p		3-hydroxyanthranilic acid dioxygenase
YALI0C01177g	4.50499	2.17152	2.24735e-06	1.35203e-05	UP		no similarity, hypothetical start
YALI0C18029g	4.50144	2.17039	0.00163412	0.00502006	UP		weakly similar to uniprot|Q90WH3 Brachydanio rerio Putative b-carotene-9 10-dioxygenase, hypothetical start					Retinal pigment epithelial membrane protein
YALI0E10505g	4.50128	2.17034	5.84173e-05	0.000261909	UP		no similarity, hypothetical start
YALI0D24365g	4.49129	2.16713	7.26337e-07	4.75713e-06	UP		weakly similar to uniprot|P05790 Bombyx mori Fibroin heavy chain precursor (Fib-H) (H-fibroin), hypothetical start
YALI0E16555g	4.48661	2.16563	3.09448e-12	4.39804e-11	UP		no similarity, hypothetical start					Protein of unknown function (DUF974)
YALI0D09603g	4.48308	2.16449	3.78724e-15	7.20369e-14	UP		weakly similar to uniprot|Q03103 Saccharomyces cerevisiae YML130c ERO1 required for protein disulfide bond formation in the ER	YML130C	ERO1	Thiol oxidase required for oxidative protein folding in the endoplasmic reticulum		Endoplasmic Reticulum Oxidoreductin 1 (ERO1)	ERO1	Protein described as similar to S. cerevisiae Ero1p, which has a role in formation of disulfide bonds in the endoplasmic reticulum; fluconazole-induced; transcriptionally activated by Mnl1p under weak acid stress
YALI0B19338g	4.44602	2.15252	1.89093e-15	3.6885e-14	UP		similar to uniprot|P04817 Saccharomyces cerevisiae YEL063c CAN1 amino acid permease	YEL063C	CAN1	Plasma membrane arginine permease, requires phosphatidyl ethanolamine (PE) for localization, exclusively associated with lipid rafts; mutation confers canavanine resistance		Amino acid permease	CAN2	Putative amino acid permease; transcription is regulated by Nrg1p and Tup1p; caspofungin induced; flucytosine induced; shows colony morphology-related gene regulation by Ssn6p; ; fungal-specific (no human or murine homolog)
YALI0D18502g	4.44115	2.15093	1.22343e-10	1.46374e-09	UP		no similarity, hypothetical start
YALI0D12364g	4.4324	2.14809	1.76578e-14	3.15999e-13	UP		some similarities with uniprot|Q9QXE2 Mus musculus DNA polymerase lambda	YCR014C	POL4	DNA polymerase IV, undergoes pair-wise interactions with Dnl4p-Lif1p and Rad27p to mediate repair of DNA double-strand breaks by non-homologous end joining (NHEJ); homologous to mammalian DNA polymerase beta		Fingers domain of DNA polymerase lambda BRCA1 C Terminus (BRCT) domain
YALI0F29139g	4.42475	2.14559	4.92302e-12	6.79911e-11	UP		similar to uniprot|P47016 Saccharomyces cerevisiae YJL126w NIT2 nitrilase	YJL126W	NIT2	Nit protein, one of two proteins in S. cerevisiae with similarity to the Nit domain of NitFhit from fly and worm and to the mouse and human Nit protein which interacts with the Fhit tumor suppressor; nitrilase superfamily member		Carbon-nitrogen hydrolase
YALI0C03608g	4.40474	2.13906	1.61525e-13	2.58481e-12	UP	ATG22	Autophagy-related protein 22	YCL038C	ATG22	Vacuolar integral membrane protein required for efflux of amino acids during autophagic body breakdown in the vacuole; null mutation causes a gradual loss of viability during starvation		Vacuole effluxer Atg22 like
YALI0D00605g	4.38047	2.13108	2.01571e-14	3.57704e-13	UP		similar to uniprot|Q96VU8 Neurospora crassa Cystathionine beta-lyase (EC 4.4.1.8)	YGL184C	STR3	Cystathionine beta-lyase, converts cystathionine into homocysteine		Cys/Met metabolism PLP-dependent enzyme	orf19.2092	Gcn4p-regulated
YALI0D10615g	4.37697	2.12993	3.36926e-07	2.37042e-06	UP		some similarities with uniprot|Q6CG78 Yarrowia lipolytica YALI0B00110g	YER116C	SLX8	Subunit of the Slx5-Slx8 SUMO-targeted ubiquitin ligase (STUbL) complex; stimulated by prior attachment of SUMO to the substrate; contains a C-terminal RING domain		Zinc finger, C3HC4 type (RING finger)
YALI0C20713g	4.36483	2.12593	0.0121677	0.0291593	UP		no similarity, hypothetical start
YALI0E02112g	4.35385	2.12229	0.00657261	0.0171764	UP		weakly similar to uniprot|O53294 Mycobacterium tuberculosis monoxygenase (Monooxygenase, flavin-binding family), possible transmembrane segment, hypothetical start					Pyridine nucleotide-disulphide oxidoreductase
YALI0A08261g	4.33657	2.11656	9.19255e-05	0.000391685	UP		weakly similar to KLLA0E01001g Kluyveromyces lactis IPF 3777.1	YNL233W	BNI4	Targeting subunit for Glc7p protein phosphatase, localized to the bud neck, required for localization of chitin synthase III to the bud neck via interaction with the chitin synthase III regulatory subunit Skt5p			BNI4	Protein required for wild-type cell wall chitin distribution, morphology, hyphal growth; not essential; similar to S. cerevisiae Bni4p (targeting subunit for Glc7p phosphatase, involved in bud-neck localization of chitin synthase III)
YALI0C05907g	4.32962	2.11424	2.52518e-05	0.000123404	UP		no similarity, hypothetical start
YALI0D18403g	4.31912	2.11074	1.63113e-05	8.32334e-05	UP	ATG26	Sterol 3-beta-glucosyltransferase (EC 2.4.1.173) (Autophagy-related protein 26)	YLR189C	ATG26	UDP-glucose:sterol glucosyltransferase, conserved enzyme involved in synthesis of sterol glucoside membrane lipids; in contrast to ATG26 from P. pastoris, S. cerevisiae ATG26 is not involved in autophagy		UDP-glucoronosyl and UDP-glucosyl transferase PH domain GRAM domain Glycosyltransferase family 28 N-terminal domain
YALI0E25806g	4.31902	2.1107	2.68241e-08	2.2813e-07	UP		no similarity, hypothetical start
YALI0D24728g	4.30616	2.1064	1.38756e-11	1.82887e-10	UP		weakly similar to wi|NCU05004.1 Neurospora crassa NCU05004.1 hypothetical protein, hypothetical start					Protein of unknown function (DUF3445)
YALI0F24717g	4.29629	2.10309	7.42097e-17	1.63133e-15	UP		weakly similar to uniprot|C5JP18 Ajellomyces dermatitidis (Blastomyces dermatitidis) BDBG_04101 Grp1p, RNP domain-containing protein					RNA recognition motif (a.k.a. RRM, RBD, or RNP domain)
YALI0E00462g	4.28878	2.10057	1.22499e-14	2.21684e-13	UP		some similarities with uniprot|Q08269 Saccharomyces cerevisiae YOL130w ALR1 divalent cation transporter possible transmembrane segments	YFL050C	ALR2	Probable Mg(2+) transporter; overexpression confers increased tolerance to Al(3+) and Ga(3+) ions; plays a role in regulating Ty1 transposition	SIMILAR TO	CorA-like Mg2+ transporter protein
YALI0E20515g	4.28476	2.09922	6.87081e-10	7.5259e-09	UP		weakly similar to DEHA0G10219g Debaryomyces hansenii, hypothetical start					Alpha/beta hydrolase family	orf19.6065	Gene transcription regulated by Mig1p and Tup1p; amphotericin B, caspofungin repressed; protein detected by mass spec in exponential and stationary phase cultures
YALI0F23551g	4.28315	2.09867	2.32817e-15	4.5094e-14	UP		similar to uniprot|CAD60606 Podospora anserina similarity to thiosulfate sulfurtransferases	YOR251C	TUM1	Mitochondrial protein, required for formation of the 2-thio group of the 5-methoxycarbonylmethyl-2-thiouridine modified base in some tRNAs; has similarity to mammalian thiosulfate sulfurtransferase (rhodanese)		Rhodanese-like domain	orf19.1356
YALI0C05951g	4.28296	2.09861	3.1244e-15	5.97871e-14	UP		similar to uniprot|Q12618 Ajellomyces capsulata Delta-9 fatty acid desaturase (EC 1.14.99.5) (Acyl-CoA desaturase) (Stearoyl-CoA desaturase) (Delta(9)- desaturase)	YGL055W	OLE1	Delta(9) fatty acid desaturase, required for monounsaturated fatty acid synthesis and for normal distribution of mitochondria		Fatty acid desaturase Cytochrome b5-like Heme/Steroid binding domain	OLE1	Fatty acid desaturase (stearoyl-CoA desaturase), essential protein involved in oleic acid synthesis; required for aerobic hyphal growth and chlamydospore formation; subject to hypoxic regulation; fluconazole-induced; caspofungin repressed
YALI0E23185g	4.2789	2.09724	4.31735e-05	0.000200205	UP		highly similar to uniprot|P31787 Saccharomyces cerevisiae YGR037C ACBP Acyl-CoA-binding protein (ACBP)	YGR037C	ACB1	Acyl-CoA-binding protein, transports newly synthesized acyl-CoA esters from fatty acid synthetase (Fas1p-Fas2p) to acyl-CoA-consuming processes		Acyl CoA binding protein	ACB1	Protein described as similar to a region of acyl-coenzyme-A-binding protein; amphotericin B repressed; regulated by Nrg1p, Tup1p
YALI0B11748g	4.27715	2.09665	1.48354e-13	2.38605e-12	UP		some similarities with uniprot|P32583 Saccharomyces cerevisiae YKR092c SRP40 suppressor of mutant AC40 of RNA polymerase I and III singleton, hypothetical start
YALI0F14135g	4.27712	2.09664	1.44906e-11	1.90204e-10	UP		similar to CA4251|IPF4291 Candida albicans IPF4291 unknown function, hypothetical start					Palmitoyl protein thioesterase
YALI0C13178g	4.27602	2.09627	2.64332e-12	3.77371e-11	UP		some similarities with uniprot|P33122 Saccharomyces cerevisiae YOR344c TYE7 basic helix-loop-helix transcription factor, hypothetical start					Helix-loop-helix DNA-binding domain
YALI0C04884g	4.25962	2.09072	2.25462e-13	3.57196e-12	UP		similar to uniprot|Q03193 Saccharomyces cerevisiae YDR090C Hypothetical 34.6 kDa protein	YDR090C		Putative protein of unknown function		PQ loop repeat	orf19.6720	similar to S. cerevisiae Ydr090cp; transposon mutation affects filamentous growth
YALI0A02288g	4.25805	2.09019	0.00105956	0.00341523	UP		weakly similar to wi|NCU09374.1 Neurospora crassa NCU09374.1 hypothetical protein, hypothetical start					Transient receptor potential (TRP) ion channel
YALI0F01914g	4.25418	2.08888	3.52646e-11	4.45399e-10	UP		no similarity, identified by RNAseq
YALI0C19668g	4.25292	2.08846	7.09781e-08	5.57384e-07	UP		similar to uniprot|Q12335 Saccharomyces cerevisiae YDR032c PST2	YDR032C	PST2	Protein with similarity to members of a family of flavodoxin-like proteins; induced by oxidative stress in a Yap1p dependent manner; the authentic, non-tagged protein is detected in highly purified mitochondria in high-throughput studies	SIMILAR TO	NADPH-dependent FMN reductase
YALI0E03476g	4.25181	2.08808	1.6318e-07	1.20826e-06	UP		weakly similar to uniprot|Q7RWQ3 Neurospora crassa NCU03554.1, hypothetical start
YALI0C13750g	4.24805	2.0868	1.03146e-14	1.883e-13	UP		some similarities with uniprot|P33749 Saccharomyces cerevisiae YKL062w MSN4 transcriptional activator	YMR037C	MSN2	Transcriptional activator related to Msn4p; activated in stress conditions, which results in translocation from the cytoplasm to the nucleus; binds DNA at stress response elements of responsive genes, inducing gene expression	SIMILAR TO	Zinc-finger double domain
YALI0E25850g	4.23577	2.08263	4.59468e-05	0.000211368	UP		no similarity, hypothetical start					Protein of unknown function (DUF3317)
YALI0A17171g	4.22148	2.07775	1.04638e-08	9.37608e-08	UP		similar to uniprot|P53049 Saccharomyces cerevisiae YGR281w YOR1 ATP-binding cassette transporter protein	YGR281W	YOR1	Plasma membrane ATP-binding cassette (ABC) transporter, multidrug transporter mediates export of many different organic anions including oligomycin; similar to human cystic fibrosis transmembrane receptor (CFTR)	SIMILAR TO	ABC transporter transmembrane region ABC transporter
YALI0F11011g	4.20271	2.07132	1.5292e-05	7.87278e-05	UP		no similarity	YGR044C	RME1	Zinc finger protein involved in control of meiosis; prevents meiosis by repressing IME1 expression and promotes mitosis by activating CLN2 expression; directly repressed by a1-alpha2 regulator; mediates cell type control of sporulation	SIMILAR TO
YALI0E23628g	4.1972	2.06943	1.62689e-14	2.92794e-13	UP		some similarities with uniprot|O13845 Schizosaccharomyces pombe Putative splicing factor	YER165W	PAB1	Poly(A) binding protein, part of the 3'-end RNA-processing complex, mediates interactions between the 5' cap structure and the 3' mRNA poly(A) tail, involved in control of poly(A) tail length, interacts with translation factor eIF-4G	SIMILAR TO	RNA recognition motif. (a.k.a. RRM, RBD, or RNP domain) RNA recognition motif (a.k.a. RRM, RBD, or RNP domain)
YALI0E19745g	4.19328	2.06808	1.84784e-15	3.62325e-14	UP		similar to uniprot|Q9HEM5 Neurospora crassa NCU01320.1 hypothetical protein (AL451017) related to microsomal glutathione S-transferase 3					MAPEG family
YALI0E33539g	4.19223	2.06772	3.59006e-12	5.06836e-11	UP		similar to uniprot|P53616 Saccharomyces cerevisiae YNL066w SUN4	YNL066W	SUN4	Cell wall protein related to glucanases, possibly involved in cell wall septation; member of the SUN family		Beta-glucosidase (SUN family)	SUN41	Putative cell wall glycosidase involved in biofilm formation; required for cell separation; hyphal induced; caspofungin repressed; Efg1p, Cph1p regulated; O-glycosylation, potential Kex2p substrate; 9 5' E-boxes; 5'-UTR intron
YALI0E19965g	4.19119	2.06736	6.27354e-14	1.05718e-12	UP		some similarities to uniprot|P32338 Saccharomyces cerevisiae YGR044c RME1 and other zinc-finger transcription factors, hypothetical start
YALI0D17798g	4.18142	2.06399	2.25701e-14	3.99408e-13	UP		no similarity, hypothetical start
YALI0C24376g	4.17575	2.06203	6.98656e-11	8.55214e-10	UP		weakly similar to uniprot|Q10140 Schizosaccharomyces pombe Hypothetical protein C3H8.04 in chromosome I, hypothetical start					Domain of unknown function (DUF4210)
YALI0D26818g	4.17119	2.06046	3.55378e-15	6.77993e-14	UP		similar to uniprot|P38778 Saccharomyces cerevisiae YHR050W Transporter protein SMF2	YHR050W	SMF2	Divalent metal ion transporter involved in manganese homeostasis; has broad specificity for di-valent and tri-valent metals; post-translationally regulated by levels of metal ions; member of the Nramp family of metal transport proteins		Natural resistance-associated macrophage protein	orf19.5022
YALI0D17820g	4.16649	2.05883	1.5881e-07	1.18002e-06	UP		no similarity, hypothetical start
YALI0F16709g	4.16024	2.05667	3.76563e-14	6.51855e-13	UP		Alkaline phosphatase (EC 3.1.3.1)	YDR481C	PHO8	Repressible alkaline phosphatase, a glycoprotein localized to the vacuole; regulated by levels of inorganic phosphate and by a system consisting of Pho4p, Pho9p, Pho80p, Pho81p and Pho85p; dephosphorylates phosphotyrosyl peptides		Alkaline phosphatase	orf19.4736
YALI0B21186g	4.13664	2.04846	1.14029e-14	2.07572e-13	UP		similar to uniprot|P37302 Saccharomyces cerevisiae YBR286w APE3 vacuolar aminopeptidase Y singleton	YBR286W	APE3	Vacuolar aminopeptidase Y, processed to mature form by Prb1p		Peptidase family M28 PA domain	APE3	regulated by Gcn2p and Gcn4p
YALI0F30899g	4.12902	2.0458	0.0128728	0.0305951	UP		weakly similar to uniprot|P17695 Saccharomyces cerevisiae YDR513w TTR1 glutaredoxin P2.431.f2.1, hypothetical start
YALI0E18348g	4.11654	2.04143	2.55815e-07	1.84472e-06	UP		similar to uniprot|P14065 Saccharomyces cerevisiae YOR120w GCY1 galactose-induced protein of aldo/keto reductase family	YOR120W	GCY1	Putative NADP(+) coupled glycerol dehydrogenase, proposed to be involved in an alternative pathway for glycerol catabolism; member of the aldo-keto reductase (AKR) family	SIMILAR TO	Aldo/keto reductase family
YALI0E31603g	4.10456	2.03723	9.6307e-12	1.29353e-10	UP		similar to KLLA0B14839g Kluyveromyces lactis IPF 6866.1, hypothetical start					Phosphoesterase family
YALI0E12067g	4.10446	2.03719	4.32584e-07	2.95506e-06	UP		similar to uniprot|P23060 Saccharomyces cerevisiae YCR019w MAK32 necessary for structural stability of L-A dsRNA-containing particles	YCR019W	MAK32	Protein necessary for structural stability of L-A double-stranded RNA-containing particles		pfkB family carbohydrate kinase	MAK32	Downregulated upon adherence to polystyrene
YALI0D23617g	4.10266	2.03656	3.9304e-15	7.45368e-14	UP		weakly similar to uniprot|Q12164 Saccharomyces cerevisiae Chromosome XII reading frame ORF YLL023C	YLL023C		Protein of unknown function; highly conserved across species and orthologous to human TMEM33; may interact with ribosomes, based on co-purification experiments; GFP-fusion protein localizes to the endoplasmic reticulum		Uncharacterised protein family (UPF0121)	orf19.1054
YALI0F32060g	4.10224	2.03641	9.17554e-12	1.24026e-10	UP		some similarities with Saccharomyces cerevisiae YKL038W RGT1 Glucose-responsive transcription factor that regulates expression of several glucose transporter (HXT) genes in response to glucose, pseudogene" /pseudo exon 3977961..3978032 /number=1 /locus_tag="YALI0F32060g
YALI0D15026g	4.09802	2.03493	1.7182e-10	2.03273e-09	UP		weakly similar to uniprot|P46996 Saccharomyces cerevisiae YJL163c, hypothetical start					Major Facilitator Superfamily
YALI0E30107g	4.0947	2.03376	3.47497e-10	3.9352e-09	UP		some similarities with uniprot|Q9VYU0 Drosophila melanogaster CG32662 protein, hypothetical start					galactosyl transferase GMA12/MNN10 family
YALI0F24145g	4.09099	2.03245	5.44173e-09	5.17535e-08	UP		weakly similar to wi|NCU01815.1 Neurospora crassa NCU01815.1 predicted protein, hypothetical start					Eukaryotic cytochrome b561
YALI0B08184g	4.07493	2.02678	2.17919e-15	4.23377e-14	UP	MET3	Sulfate adenylyltransferase (EC 2.7.7.4) (ATP-sulfurylase) (Sulfate adenylate transferase) (SAT)	YJR010W	MET3	ATP sulfurylase, catalyzes the primary step of intracellular sulfate activation, essential for assimilatory reduction of sulfate to sulfide, involved in methionine metabolism		PUA-like domain ATP-sulfurylase Adenylylsulphate kinase	MET3	Putative ATP sulfurlyase of sulfate assimilation; repressed by Met or Cys, Sfu1p, or in fluconazole-resistant isolate; strongly induced on biofilm formation, even in presence of Met and Cys; Hog1p-, caspofungin-, possibly adherence-induced
YALI0E05511g	4.06967	2.02491	0.000605705	0.0020834	UP		no similarity, hypothetical start					Protein of unknown function (DUF3237)
YALI0F11385g	4.06918	2.02474	1.65475e-05	8.42357e-05	UP		some similarities with uniprot|P38691 Saccharomyces cerevisiae YHR082c KSP1 ser/thr protein kinase	YHR082C	KSP1	Ser/thr protein kinase; nuclear translocation required for haploid filamentous growth; regulates filamentous growth induced nuclear translocation of Bcy1p, Fus3p, and Sks1p; overproduction causes allele-specific suppression of prp20-10		Protein kinase domain	KSP1	Putative protein of unknown function; mRNA binds to She3p and is localized to hyphal tips; mutation confers hypersensitivity to amphotericin B
YALI0F13761g	4.06081	2.02177	3.15769e-08	2.63958e-07	UP		highly similar to uniprot|Q6C6X1 Yarrowia lipolytica YALI0E05577g, start by similarity
YALI0D15664g	4.05199	2.01863	1.64545e-09	1.68605e-08	UP		weakly similar to uniprot|P38867 Saccharomyces cerevisiae YHR177w	YHR177W		Putative protein of unknown function; overexpression causes a cell cycle delay or arrest	SIMILAR TO	Gti1/Pac2 family
YALI0C19844g	4.04824	2.0173	3.33337e-07	2.35038e-06	UP		no similarity, hypothetical start
YALI0D23067g	4.03775	2.01355	5.75134e-14	9.71762e-13	UP		weakly similar to uniprot|Q96U78 Neurospora crassa Hypothetical 49.4 kDa protein, hypothetical start					Protein of unknown function (DUF4243)
YALI0E00990g	4.02855	2.01026	1.67053e-11	2.18372e-10	UP		no similarity, hypothetical start
YALI0F03795g	4.02598	2.00934	2.42428e-05	0.000119391	UP		weakly similar to uniprot|P53389 Saccharomyces cerevisiae YNR055c HOL1 member of major facilitator superfamily multidrug-resistance protein subfamily	YNR055C	HOL1	Putative transporter in the major facilitator superfamily (DHA1 family) of multidrug resistance transporters; mutations in membrane-spanning domains permit cation and histidinol uptake	SIMILAR TO	Major Facilitator Superfamily	HOL4	Protein described as an ion transporter; alkaline upregulated by Rim101p; Plc1p-regulated; caspofungin repressed
YALI0A18898g	4.02081	2.00749	1.06946e-05	5.68561e-05	UP		weakly similar to uniprot|Q96UB6 Neurospora crassa Conserved hypothetical protein	YMR171C	EAR1	Specificity factor required for Rsp5p-dependent ubiquitination and sorting of specific cargo proteins at the multivesicular body; mRNA is targeted to the bud via the mRNA transport system involving She2p		SPRY domain	orf19.2703	Transcriptionally regulated by iron; expression greater in low iron; increased expression observed in an ssr1 homozygous null mutant; similar to S. cerevisiae Ymr171cp; fungal-specific (no human or murine homolog)
YALI0F25707g	4.00917	2.0033	1.05974e-06	6.78002e-06	UP		no similarity, hypothetical start
YALI0B04312g	4.00246	2.00089	4.98369e-15	9.36728e-14	UP		similar to uniprot|O74247 Pichia pastoris and to uniprot|P11986 Saccharomyces cerevisiae YJL153c INO1 myo- inositol-1-phosphate synthase	YJL153C	INO1	Inositol 1-phosphate synthase, involved in synthesis of inositol phosphates and inositol-containing phospholipids; transcription is coregulated with other phospholipid biosynthetic genes by Ino2p and Ino4p, which bind the UASINO DNA element		Myo-inositol-1-phosphate synthase
YALI0D20834g	4.00107	2.00039	5.5063e-14	9.35335e-13	UP		similar to KLLA0D12606g Kluyveromyces lactis IPF 4552.1	YNR055C	HOL1	Putative transporter in the major facilitator superfamily (DHA1 family) of multidrug resistance transporters; mutations in membrane-spanning domains permit cation and histidinol uptake	SIMILAR TO	Major Facilitator Superfamily
YALI0D01529g	3.98942	1.99618	2.39299e-12	3.44732e-11	UP		weakly similar to uniprot|P18899 Saccharomyces cerevisiae YMR173w DDR48 heat shock protein, hypothetical start
YALI0F30613g	3.98637	1.99507	7.28804e-14	1.21078e-12	UP		similar to uniprot|Q9P5M9 Schizosaccharomyces pombe putative class II aldolase, hypothetical start					Class II Aldolase and Adducin N-terminal domain	orf19.6679
YALI0D17446g	3.98216	1.99355	5.5205e-13	8.49195e-12	UP		similar to uniprot|O74916 Schizosaccharomyces pombe Putative acetylornithine deacetylase, start by similarity					Peptidase family M20/M25/M40 Peptidase dimerisation domain
YALI0C07282g	3.98076	1.99304	4.65323e-09	4.47231e-08	UP		no similarity, hypothetical start
YALI0A19514g	3.97007	1.98917	8.43607e-05	0.000363352	UP		similar to uniprot|Q06436 Saccharomyces cerevisiae YLR427w	YLR427W	MAG2	Cytoplasmic protein of unknown function; induced in response to mycotoxin patulin; ubiquitinated protein similar to the human ring finger motif protein RNF10; predicted to be involved in repair of alkylated DNA due to interaction with MAG1		Zinc finger, C3HC4 type (RING finger)	orf19.5676
YALI0E29975g	3.96898	1.98877	4.06646e-14	7.00114e-13	UP		weakly similar to uniprot|P11353 Saccharomyces cerevisiae YDR044w HEM13 coproporphyrinogen III oxidase	YDR044W	HEM13	Coproporphyrinogen III oxidase, an oxygen requiring enzyme that catalyzes the sixth step in the heme biosynthetic pathway; transcription is repressed by oxygen and heme (via Rox1p and Hap1p)		Coproporphyrinogen III oxidase	HEM13	Coproporphyrinogen III oxidase; antigenic in human/mouse; localizes to yeast-form cell surface, not hyphae; soluble in hyphae; iron-regulated expression; macrophage-downregulated; not Rfg1p regulated, farnesol-induced; possibly essential
YALI0B02200g	3.96752	1.98824	0.0222393	0.049263	UP		no similarity, hypothetical start
YALI0B18568g	3.95997	1.98549	2.38734e-10	2.77271e-09	UP		similar to uniprot|Q6C5E4 Yarrowia lipolytica YALI0E18766g, start by similarity
YALI0E15730g	3.95673	1.98431	8.17476e-15	1.51412e-13	UP		similar to uniprot|P32476 Saccharomyces cerevisiae YGR175c ERG1 squalene monooxygenase	YGR175C	ERG1	Squalene epoxidase, catalyzes the epoxidation of squalene to 2,3-oxidosqualene; plays an essential role in the ergosterol-biosynthesis pathway and is the specific target of the antifungal drug terbinafine		Thi4 family Squalene epoxidase	ERG1	Squalene epoxidase, catalyzes epoxidation of squalene to 2,3(S)-oxidosqualene in the ergosterol biosynthetic pathway; essential; target of allylamine antifungal drugs; uses NADH as a reducing cofactor, while S. cerevisiae Erg1p uses NADPH
YALI0B03146g	3.95533	1.9838	0.000983865	0.00319718	UP		weakly similar to uniprot|Q07807 Saccharomyces cerevisiae YLL013c transcript-specific regulator of mRNA degradation	YLL013C	PUF3	Protein of the mitochondrial outer surface, links the Arp2/3 complex with the mitochore during anterograde mitochondrial movement; also binds to and promotes degradation of mRNAs for select nuclear-encoded mitochondrial proteins	SIMILAR TO	Pumilio-family RNA binding repeat
YALI0D22957g	3.93408	1.97603	0.000776397	0.00260838	UP		weakly similar to uniprot|Q12303 Saccharomyces cerevisiae YLR121c YPS3 GPI-anchored aspartyl protease 3 (yapsin 3)	YIR039C	YPS6	Putative GPI-anchored aspartic protease	SIMILAR TO	Eukaryotic aspartyl protease
YALI0C06391g	3.93298	1.97562	2.35289e-05	0.000116417	UP		weakly similar to uniprot|Q02817 Homo sapiens Mucin 2 precursor, putative adhesion protein, hypothetical start
YALI0D06501g	3.92856	1.974	0.000174652	0.000686613	UP		similar to uniprot|P33312 Saccharomyces cerevisiae Saccharomyces cerevisiae YBR153w RIB7 5-amino-6-(5- phosphoribosylamino)uracil reductase	YBR153W	RIB7	Diaminohydroxyphoshoribosylaminopyrimidine deaminase; catalyzes the second step of the riboflavin biosynthesis pathway		RibD C-terminal domain	orf19.6341
YALI0C07304g	3.92803	1.97381	8.56141e-14	1.41642e-12	UP		some similarities with DEHA0F09273g Debaryomyces hansenii	YBR187W	GDT1	Putative protein of unknown function; expression is reduced in a gcr1 null mutant; GFP-fusion protein localizes to the vacuole; expression pattern and physical interactions suggest a possible role in ribosome biogenesis		Uncharacterized protein family UPF0016	orf19.4496
YALI0C15114g	3.92028	1.97096	3.14892e-13	4.93953e-12	UP		similar to uniprot|P24866 Candida albicans G1/S- specific cyclin CLN1	YLR210W	CLB4	B-type cyclin involved in cell cycle progression; activates Cdc28p to promote the G2/M transition; may be involved in DNA replication and spindle assembly; accumulates during S phase and G2, then targeted for ubiquitin-mediated degradation	SIMILAR TO	Cyclin, N-terminal domain
YALI0E13970g	3.92022	1.97093	5.30085e-11	6.55181e-10	UP		some similarities with DEHA0D03223g Debaryomyces hansenii	YGL082W		Putative protein of unknown function; predicted prenylation/proteolysis target of Afc1p and Rce1p; green fluorescent protein (GFP)-fusion protein localizes to the cytoplasm and nucleus; YGL082W is not an essential gene		Protein of unknown function (DUF544)	orf19.3615	induced in core caspofungin response; increased expression observed in an ssr1 homozygous null mutant; induced by nitric oxide in yhb1 mutant
YALI0E13442g	3.89127	1.96024	1.35149e-11	1.78503e-10	UP		similar to uniprot|P53394 Saccharomyces cerevisiae YPR003c	YPR003C		Putative sulfate permease; physically interacts with Hsp82p; green fluorescent protein (GFP)-fusion protein localizes to the ER; YPR003C is not an essential gene		Sulfate transporter N-terminal domain with GLY motif Sulfate transporter family STAS domain	orf19.2149
YALI0B21054g	3.88306	1.95719	9.52891e-10	1.01914e-08	UP		weakly similar to uniprot|Q8VCG3 Mus musculus Hypothetical protein, hypothetical start
YALI0E30833g	3.88134	1.95655	2.31896e-12	3.34826e-11	UP		weakly similar to uniprot|P21133 Emericella nidulans PENDE Acyl-coenzyme A:6-aminopenicillanic-acid-acyltransferase precursor (EC 2.3.1.-)(Isopenicillin N acyltransferase), hypothetical start					Acyl-coenzyme A:6-aminopenicillanic acid acyl-transferase
YALI0A18403g	3.87835	1.95544	7.86091e-09	7.22726e-08	UP		no similarity, hypothetical start
YALI0F22363g	3.85268	1.94586	9.90184e-14	1.60886e-12	UP		weakly similar to uniprot|O74347 Schizosaccharomyces pombe Hypothetical UPF0287 protein C21D10.07 in chromosome II, start by similarity					Cytochrome c oxidase biogenesis protein Cmc1 like	orf19.1336.2
YALI0E03608g	3.8501	1.9449	6.29139e-12	8.61405e-11	UP		no similarity, hypothetical start
YALI0D18436g	3.8457	1.94325	6.20556e-06	3.45521e-05	UP		no similarity, hypothetical start
YALI0C05929g	3.84096	1.94147	1.06038e-12	1.57765e-11	UP		weakly similar to uniprot|P47163 Saccharomyces cerevisiae YJR129c	YJR129C		Putative protein of unknown function; predicted S-adenosylmethionine-dependent methyltransferase of the seven beta-strand family; green fluorescent protein (GFP)-fusion protein localizes to the cytoplasm		Putative methyltransferase	orf19.2066
YALI0E11429g	3.83139	1.93787	2.48723e-14	4.353e-13	UP		weakly similar to uniprot|Q9P4F1 Aspergillus parasiticus MOXY monooxigenase, hypothetical start					Pyridine nucleotide-disulphide oxidoreductase
YALI0A07623g	3.81951	1.93339	1.71536e-08	1.50106e-07	UP		weakly similar to uniprot|Q8NIX1 Neurospora crassa Related to integral membrane protein PTH11, start by similarity
YALI0B10736g	3.81863	1.93306	1.78835e-07	1.31498e-06	UP		highly similar to uniprot|Q04013 Saccharomyces cerevisiae YMR241w YHM2 yeast suppressor gene of HM (mitochondrial histone) mutant (ABF2) singleton	YMR241W	YHM2	Mitochondrial DNA-binding protein, component of the mitochondrial nucleoid structure, involved in mtDNA replication and segregation of mitochondrial genomes; member of the mitochondrial carrier protein family		Mitochondrial carrier protein	YHM2	Alkaline upregulated
YALI0E10065g	3.81084	1.93011	2.4306e-13	3.83166e-12	UP		similar to uniprot|P19516 Saccharomyces cerevisiae YPL132w COX11 cytochrome-c oxidase assembly protein	YPL132W	COX11	Mitochondrial inner membrane protein required for delivery of copper to the Cox1p subunit of cytochrome c oxidase; association with mitochondrial ribosomes suggests that copper delivery may occur during translation of Cox1p		Cytochrome c oxidase assembly protein CtaG/Cox11	COX11	Cytochrome oxidase assembly protein; transcription is regulated by Nrg1p; transcription is upregulated in both intermediate and mature biofilms; protein repressed during the mating process
YALI0E24167g	3.80603	1.92829	1.4946e-09	1.54645e-08	UP		weakly similar to uniprot|Q2VQ77 Saccharomyces cerevisiae YPL092w SSU1 Plasma membrane sulfite pump involved in sulfite metabolism and required for efficient sulfite efflux	YPL092W	SSU1	Plasma membrane sulfite pump involved in sulfite metabolism and required for efficient sulfite efflux; major facilitator superfamily protein		C4-dicarboxylate transporter/malic acid transport protein
YALI0C22407g	3.80247	1.92694	0.000142802	0.000576035	UP		some similarities with uniprot|Q6CHX2 Yarrowia lipolytica YALI0A03861g, no start
YALI0E12081g	3.80145	1.92655	3.57482e-05	0.000169357	UP		similar to uniprot|P28263 Saccharomyces cerevisiae YEL012w UBC8 E2 ubiquitin-conjugating enzyme	YEL012W	UBC8	Ubiquitin-conjugating enzyme that negatively regulates gluconeogenesis by mediating the glucose-induced ubiquitination of fructose-1,6-bisphosphatase (FBPase); cytoplasmic enzyme that catalyzes the ubiquitination of histones in vitro		Ubiquitin-conjugating enzyme	UBC8	Protein similar to S. cerevisiae Ubc8p; transcription is induced in response to alpha pheromone in SpiderM medium
YALI0A06699g	3.79461	1.92395	0.000985074	0.00319924	UP		Guanine nucleotide-binding protein subunit gamma					GGL domain
YALI0D14784g	3.79456	1.92393	1.22892e-09	1.28834e-08	UP		weakly similar to uniprot|O74498 Schizosaccharomyces pombe Hypothetical protein with UBX Domain present in ubiquitin-regulatory proteins	YDL091C	UBX3	UBX (ubiquitin regulatory X) domain-containing protein that interacts with Cdc48p, green fluorescent protein (GFP)-fusion protein localizes to the cytoplasm in a punctate pattern		UBX domain	orf19.1595
YALI0E12639g	3.79127	1.92268	1.13719e-07	8.62206e-07	UP		weakly similar to uniprot|Q9P3U8 Schizosaccharomyces pombe Zf-C3H4C zinc finger protein					Zinc finger, C3HC4 type (RING finger)
YALI0E31889g	3.79094	1.92256	1.47912e-07	1.10812e-06	UP		weakly similar to uniprot|Q8EL71 Oceanobacillus iheyensis Hypothetical conserved protein, hypothetical start					Beta-lactamase
YALI0D21538g	3.76418	1.91234	3.79883e-05	0.000179035	UP		no similarity, hypothetical start
YALI0E32879g	3.76369	1.91215	1.15231e-12	1.70644e-11	UP		weakly similar to uniprot|Q7RZA3 Neurospora crassa NCU03965.1, hypothetical start					WD domain, G-beta repeat
YALI0B08118g	3.76079	1.91104	7.42584e-11	9.02033e-10	UP	AIM34	Altered inheritance of mitochondria protein 34, mitochondrial					SAP domain
YALI0E10395g	3.76052	1.91093	4.88166e-08	3.93069e-07	UP		similar to uniprot|Q8X035 Neurospora crassa	YGL014W	PUF4	Member of the PUF protein family, which is defined by the presence of Pumilio homology domains that confer RNA binding activity; preferentially binds mRNAs encoding nucleolar ribosomal RNA-processing factors		Pumilio-family RNA binding repeat	orf19.5381	overlaps orf19.5382
YALI0B16478g	3.75647	1.90938	7.23622e-09	6.72101e-08	UP		weakly similar to uniprot|P38799 Saccharomyces cerevisiae YHR078w hypothetical protein singleton, hypothetical start					Protein of unknown function (DUF3735) Abscisic acid G-protein coupled receptor	orf19.438
YALI0E15796g	3.75312	1.90809	0.00900312	0.0224125	UP		similar to uniprot|P38865 Saccharomyces cerevisiae YHR175w CTR2 copper transport protein	YHR175W	CTR2	Putative low-affinity copper transporter of the vacuolar membrane; mutation confers resistance to toxic copper concentrations, while overexpression confers resistance to copper starvation		Ctr copper transporter family	CTR2	induced by nitric oxide; clade-associated gene expression
YALI0B05104g	3.7531	1.90808	5.17466e-13	7.97928e-12	UP		similar uniprot|Q04033 Saccharomyces cerevisiae YDR415c	YDR415C		Putative protein of unknown function		Peptidase family M28	orf19.2484
YALI0F23661g	3.74465	1.90483	1.13844e-11	1.51307e-10	UP		similar to uniprot|P41816 Saccharomyces cerevisiae NADPH dehydrogenase 3 (EC 1.6.99.1) (Old yellow enzyme 3) YPL171c OYE3 isoform 3	YPL171C	OYE3	Conserved NADPH oxidoreductase containing flavin mononucleotide (FMN), homologous to Oye2p with slight differences in ligand binding and catalytic properties; expression induced in cells treated with the mycotoxin patulin		NADH:flavin oxidoreductase / NADH oxidase family
YALI0B05478g	3.73653	1.9017	8.01279e-13	1.21783e-11	UP		some similarities with uniprot|Q05937 Saccharomyces cerevisiae YLR375w STP3 involved in pre-tRNA splicing and in uptake of branched-chain amino acids	YLR375W	STP3	Zinc-finger protein of unknown function, possibly involved in pre-tRNA splicing and in uptake of branched-chain amino acids		Zinc finger, C2H2 type	STP4	Putative transcription factor with zinc finger DNA-binding motif; induced in core caspofungin response; shows colony morphology-related gene regulation by Ssn6p; induced by 17-beta-estradiol, ethynyl estradiol
YALI0F30459g	3.73395	1.9007	1.04854e-12	1.56371e-11	UP		similar to uniprot|P40483 Saccharomyces cerevisiae YIL108w unknown function	YIL108W		Putative metalloprotease		Putative peptidase family	orf19.246	fungal-specific (no human or murine homolog)
YALI0D26323g	3.73211	1.89999	0.000366413	0.00132113	UP		no similarity, hypothetical start
YALI0D08536g	3.72554	1.89745	1.88135e-12	2.74763e-11	UP		some similarities with uniprot|P40485 Saccharomyces cerevisiae YIL105c	YIL105C	SLM1	Phosphoinositide PI4,5P(2) binding protein, forms a complex with Slm2p; acts downstream of Mss4p in a pathway regulating actin cytoskeleton organization in response to stress; phosphorylated by the TORC2 complex		PH domain	orf19.3505
YALI0A01892g	3.72547	1.89742	0.0033095	0.00934041	UP		weakly similar to uniprot|P47179 Saccharomyces cerevisiae YJR151C	YGL023C	PIB2	Protein binding phosphatidylinositol 3-phosphate, involved in telomere-proximal repression of gene expression; similar to Fab1 and Vps27		FYVE zinc finger	orf19.1479
YALI0A01023g	3.71187	1.89214	1.17538e-05	6.18659e-05	UP		similar to uniprot|Q12691 Saccharomyces cerevisiae YDR038c ENA5 P-type ATPase involved in Na+ efflux	YDR038C	ENA5	Protein with similarity to P-type ATPase sodium pumps, member of the Na+ efflux ATPase family		haloacid dehalogenase-like hydrolase E1-E2 ATPase Cation transporting ATPase, C-terminus Cation transporter/ATPase, N-terminus	ENA2	Putative sodium transporter; transcription upregulated in response to ciclopirox olamine; alkaline upregulated by Rim101p; repressed upon high-level peroxide stress; upregulated in oral candidiasis clinical isolates; possibly essential gene
YALI0C20273g	3.7094	1.89119	0.0217075	0.0482701	UP		similar to uniprot|Q9Y774 Candida tropicalis Secreted aspartic protease 2	YLR121C	YPS3	Aspartic protease, attached to the plasma membrane via a glycosylphosphatidylinositol (GPI) anchor	SIMILAR TO	Eukaryotic aspartyl protease	SAP8	Secreted aspartyl proteinase; regulated by growth phase, temperature, and white-opaque switch; highly expressed in opaque cells; expressed upon deep epidermal invasion; greater expression during vaginal infection than oral infection
YALI0B09537g	3.69723	1.88645	1.37582e-08	1.22761e-07	UP		similar to uniprot|Q9URZ3 Schizosaccharomyces pombe Amino-acid permease	YOR348C	PUT4	Proline permease, required for high-affinity transport of proline; also transports the toxic proline analog azetidine-2-carboxylate (AzC); PUT4 transcription is repressed in ammonia-grown cells		Amino acid permease
YALI0F15961g	3.69646	1.88614	0.0109698	0.0266404	UP		no similarity, hypothetical start
YALI0F22033g	3.69395	1.88516	3.9708e-11	4.95608e-10	UP		similar to uniprot|Q06538 Saccharomyces cerevisiae YLR241w	YLR241W		Putative protein of unknown function, may be involved in detoxification		Late exocytosis, associated with Golgi transport Domain of unknown function DUF221	orf19.5932	fungal-specific (no human or murine homolog)
YALI0C15400g	3.69341	1.88495	4.29327e-07	2.93597e-06	UP		similar to ca|IPF9132 Candida albicans	YPL184C	MRN1	RNA-binding protein proposed to be involved in translational regulation; binds specific categories of mRNAs, including those that contain upstream open reading frames (uORFs) and internal ribosome entry sites (IRES)		RNA recognition motif. (a.k.a. RRM, RBD, or RNP domain) RNA recognition motif (a.k.a. RRM, RBD, or RNP domain) Putative RRM domain	orf19.5541	Protein with similarity to S. pombe Nrd1p; transcription induced upon induction of hyphal growth; regulated by Cph1p, Efg1p, Cph2p; low-level expression; alkaline upregulated; fungal-specific (no human or murine homolog)
YALI0B03366g	3.68216	1.88055	4.16803e-13	6.44271e-12	UP		similar to uniprot|P14306 Saccharomyces cerevisiae YLR178C Carboxypeptidase Y inhibitor (CPY inhibitor) (Ic) (I(C)) (Protein DKA1) (Protein NSP1) (Protein TFS1)	YLR178C	TFS1	Protein that interacts with and inhibits carboxypeptidase Y and Ira2p; phosphatidylethanolamine-binding protein (PEBP) family member; targets to vacuolar membranes during stationary phase; acetylated by NatB N-terminal acetyltransferase		Phosphatidylethanolamine-binding protein	TFS1	Transcription is regulated upon yeast-hyphal switch; shows colony morphology-related gene regulation by Ssn6p
YALI0C17897g	3.68063	1.87995	1.81956e-10	2.14465e-09	UP		some similarities with uniprot|P38263 Saccharomyces cerevisiae YBR105c VID24 required for vacuolar import and degradation of FBP1P	YBR105C	VID24	Peripheral membrane protein located at Vid (vacuole import and degradation) vesicles; regulates fructose-1,6-bisphosphatase (FBPase) targeting to the vacuole; promotes proteasome-dependent catabolite degradation of FBPase		Vacuolar import and degradation protein	orf19.7445
YALI0F31185g	3.68007	1.87973	8.12665e-07	5.28982e-06	UP		some similarities with DEHA0D16104g Debaryomyces hansenii, hypothetical start
YALI0B10384g	3.67043	1.87595	0.000114828	0.000478988	UP		no similarity, hypothetical start
YALI0F05654g	3.66528	1.87392	1.65596e-13	2.64329e-12	UP		some similarities with uniprot|Q8EAT4 Shewanella oneidensis, hypothetical start					Protein of unknown function (DUF2804)
YALI0C23661g	3.66489	1.87377	0.00034782	0.00126269	UP		similar to uniprot|P00729 Saccharomyces cerevisiae YMR297w PRC1 carboxypeptidase y serine-type protease	YBR139W		Putative serine type carboxypeptidase with a role in phytochelatin synthesis; green fluorescent protein (GFP)-fusion protein localizes to the vacuole; expression induced by nitrogen limitation in a GLN3, GAT1-independent manner	SIMILAR TO	Serine carboxypeptidase
YALI0F04213g	3.66283	1.87296	0.0029978	0.00855957	UP		emb|Z69781 Yarrowia lipolytica TSR1 gene thermosensitive suppressor of 7SRNA defect involved in the signal recognition particle-dependent translocation pathway of secretory proteins	YHL028W	WSC4	ER membrane protein involved in the translocation of soluble secretory proteins and insertion of membrane proteins into the ER membrane; may also have a role in the stress response but has only partial functional overlap with WSC1-3		WSC domain	WSC4	Transcription is specific to white cell type
YALI0A20086g	3.66164	1.87249	3.23809e-10	3.70659e-09	UP	PPE1	Protein phosphatase methylesterase 1 (PME-1) (EC 3.1.1.89)	YHR075C	PPE1	Protein with carboxyl methyl esterase activity that may have a role in demethylation of the phosphoprotein phosphatase catalytic subunit; also identified as a small subunit mitochondrial ribosomal protein		Alpha/beta hydrolase family	PPE1	Protein similar to S. cerevisiae Ppe1p; shows genetic interaction with some genes involved in diploid filamentous growth and haploid invasive growth in S. cerevisiae
YALI0E16577g	3.65785	1.871	1.31386e-05	6.85862e-05	UP		some similarities with uniprot|P34233 Saccharomyces cerevisiae YKL185w ASH1 negative regulator of HO transcription	YKL185W	ASH1	Zinc-finger inhibitor of HO transcription; mRNA is localized and translated in the distal tip of anaphase cells, resulting in accumulation of Ash1p in daughter cell nuclei and inhibition of HO expression; potential Cdc28p substrate		GATA zinc finger	ASH1	GATA-like transcription factor; localizes to nuclei of daughter cells and hyphal tip cells; mRNA localization is mediated by binding to She3p; required for wild-type virulence and filamentous growth
YALI0C11363g	3.6566	1.8705	2.08778e-11	2.70687e-10	UP		similar to uniprot|Q05902 Saccharomyces cerevisiae YLR299w ECM38 gamma-glutamyltransferase involved in glutathione synthesis	YLR299W	ECM38	Gamma-glutamyltranspeptidase, major glutathione-degrading enzyme; involved in detoxification of electrophilic xenobiotics; expression induced mainly by nitrogen starvation		Gamma-glutamyltranspeptidase	CIS2	Putative role in regulation of biogenesis of the cell wall; upregulated in biofilm; Gcn4p-regulated
YALI0C04411g	3.64286	1.86507	1.84777e-11	2.40551e-10	UP		similar to uniprot|P38925 Saccharomyces cerevisiae YOL122C Transporter protein SMF1/E	YOL122C	SMF1	Divalent metal ion transporter with a broad specificity for di-valent and tri-valent metals; post-translationally regulated by levels of metal ions; member of the Nramp family of metal transport proteins		Natural resistance-associated macrophage protein
YALI0D21208g	3.63001	1.85997	3.64626e-12	5.13629e-11	UP		similar to uniprot|O74999 Schizosaccharomyces pombe Putative DNA excision repair protein	YJR052W	RAD7	Protein that recognizes and binds damaged DNA in an ATP-dependent manner (with Rad16p) during nucleotide excision repair; subunit of Nucleotide Excision Repair Factor 4 (NEF4) and the Elongin-Cullin-Socs (ECS) ligase complex			RAD7	Protein similar to S. cerevisiae Rad7p, which is a subunit of the Nucleotide Excision Repair Factor 4; induced under hydroxyurea treatment
YALI0C19239g	3.62749	1.85897	0.0155134	0.0361542	UP		weakly similar to uniprot|Q6C860 Yarrowia lipolytica YALI0D22462g, hypothetical start
YALI0C23224g	3.62211	1.85683	0.00449732	0.0122835	UP		weakly similar to uniprot|Q7RZL5 Neurospora crassa NCU00350.1 hypothetical protein and to uniprot|AAH15087 Mus musculus Epoxide hydrolase 2 and , cytoplasmic, start by similarity					Alpha/beta hydrolase family
YALI0F31911g	3.61672	1.85468	6.82245e-12	9.30108e-11	UP	GYP7	GTPase-activating protein GYP7 (GAP for YPT7)	YDL234C	GYP7	GTPase-activating protein for yeast Rab family members including: Ypt7p (most effective), Ypt1p, Ypt31p, and Ypt32p (in vitro); involved in vesicle mediated protein trafficking		Rab-GTPase-TBC domain Domain of unknown function (DUF3548)	GYP7	similar to S. cerevisiae Gyp7p (GTPase-activating protein for Ypt1p); caspofungin-induced
YALI0B01298g	3.60469	1.84988	6.11557e-10	6.73349e-09	UP		Aldehyde dehydrogenase	YMR110C	HFD1	Putative fatty aldehyde dehydrogenase, located in the mitochondrial outer membrane and also in lipid particles; has similarity to human fatty aldehyde dehydrogenase (FALDH) which is implicated in Sjogren-Larsson syndrome		Aldehyde dehydrogenase family	orf19.6518
YALI0E17347g	3.60066	1.84826	5.47436e-12	7.54417e-11	UP		some similarities with uniprot|P38992 Saccharomyces cerevisiae YDR297w SUR2 required for the hydroxylation of C-4 of the sphingoid moiety of ceramide	YDR297W	SUR2	Sphinganine C4-hydroxylase, catalyses the conversion of sphinganine to phytosphingosine in sphingolipid biosyntheis		Fatty acid hydroxylase superfamily	SUR2	Protein described as similar to ceramide hydroxylase; predicted enzyme of sphingolipid biosynthesis; upregulated in biofilm; regulated by Tsa1p, Tsa1Bp under H2O2 stress conditions
YALI0F21406g	3.60015	1.84806	9.30008e-13	1.39677e-11	UP		Carbonic anhydrase (EC 4.2.1.1)	YNL036W	NCE103	Carbonic anhydrase; poorly transcribed under aerobic conditions and at an undetectable level under anaerobic conditions; involved in non-classical protein export pathway		Carbonic anhydrase	NCE103	Carbonic anhydrase involved in the conversion of carbon dioxide to bicarbonate; essential for pathogenesis in host niches with limited CO2, wild-type white-opaque switching; biofilm induced; activated by Mnl1p under weak acid stress
YALI0A02717g	3.59811	1.84724	4.08902e-09	3.9721e-08	UP		similar to uniprot|P42938 Saccharomyces cerevisiae YGR205w	YGR205W		ATP-binding protein of unknown function; crystal structure resembles that of E.coli pantothenate kinase and other small kinases		Phosphoribulokinase / Uridine kinase family
YALI0C15422g	3.59292	1.84516	0.00832326	0.0209168	UP		similar to wi|NCU00102.1 Neurospora crassa NCU00102.1 predicted protein, start by similarity
YALI0F12826g	3.58741	1.84294	3.65805e-12	5.14151e-11	UP		some similarities with uniprot|Q2V6T8 Callinectes sapidus Arthrodial cuticle protein AMP16.5
YALI0F00990g	3.57945	1.83974	3.46643e-05	0.000164714	UP		no similarity, hypothetical start
YALI0B18392g	3.57755	1.83897	4.84574e-12	6.70697e-11	UP		no similarity, hypothetical start
YALI0E26125g	3.57403	1.83755	4.28305e-05	0.000199196	UP		uniprot|Q8TFK5 Yarrowia lipolytica YlCWP1 Cell wall protein, start by similarity
YALI0B20944g	3.56921	1.83561	1.39279e-06	8.74085e-06	UP		no similarity, hypothetical start					Fungal Zn(2)-Cys(6) binuclear cluster domain
YALI0D14762g	3.55469	1.82972	2.41559e-12	3.46416e-11	UP		similar to uniprot|P22007 Saccharomyces cerevisiae YDL090c RAM1 protein farnesyltransferase beta subunit	YDL090C	RAM1	Beta subunit of the CAAX farnesyltransferase (FTase) that prenylates the a-factor mating pheromone and Ras proteins; required for the membrane localization of Ras proteins and a-factor; homolog of the mammalian FTase beta subunit		Prenyltransferase-like Prenyltransferase and squalene oxidase repeat	RAM1	Protein that acts in prenylation; transcription is alpha-factor induced; regulated in response to lovastatin and fluconazole
YALI0E13321g	3.55424	1.82954	9.06221e-10	9.7415e-09	UP		similar to uniprot|Q871G7 Neurospora crassa NCU04309.1	YFR007W	YFH7	Putative kinase with similarity to the phosphoribulokinase/uridine kinase/bacterial pantothenate kinase (PRK/URK/PANK) subfamily of P-loop kinases		Phosphoribulokinase / Uridine kinase family	orf19.7061
YALI0D17072g	3.55405	1.82946	5.55718e-05	0.00025042	UP		similar to uniprot|Q06549 Saccharomyces cerevisiae YLR245c CDD1 cytidine deaminase	YLR245C	CDD1	Cytidine deaminase; catalyzes the modification of cytidine to uridine in vitro but native RNA substrates have not been identified, localizes to both the nucleus and cytoplasm		Cytidine and deoxycytidylate deaminase zinc-binding region	orf19.3123.2
YALI0A03663g	3.5491	1.82745	2.90932e-09	2.90155e-08	UP		no similarity, hypothetical start
YALI0B12716g	3.54488	1.82573	9.84173e-08	7.5604e-07	UP		weakly similar to uniprot|P41546 Saccharomyces cerevisiae YFL031w HAC1 transcription factor singleton	YFL031W	HAC1	Basic leucine zipper (bZIP) transcription factor (ATF/CREB1 homolog) that regulates the unfolded protein response, via UPRE binding, and membrane biogenesis; ER stress-induced splicing pathway facilitates efficient Hac1p synthesis		bZIP transcription factor	HAC1	Putative transcription factor involved in unfolded protein response and control of morphology; transcript undergoes atypical splicing at C terminus under ER stress; induced during mating and by caspofungin; mRNA binds She3p
YALI0C04180g	3.53944	1.82352	1.85516e-11	2.41019e-10	UP		similar to uniprot|P32383 Saccharomyces cerevisiae YPL268w PLC1 1-phosphatidylinositol-4 5-bisphosphate phosphodiesterase	YPL268W	PLC1	Phospholipase C, hydrolyzes phosphatidylinositol 4,5-biphosphate (PIP2) to generate the signaling molecules inositol 1,4,5-triphosphate (IP3) and 1,2-diacylglycerol (DAG); involved in regulating many cellular processes		Phosphatidylinositol-specific phospholipase C, Y domain Phosphatidylinositol-specific phospholipase C, X domain C2 domain	PLC1	Phosphoinositide-specific phospholipase C (PI-PLC), delta-form; essential; roles in stress resistance, hyphal growth; upregulated in biofilm; predicted N-linked glycosylation; lacks conserved EF-hand domain
YALI0E20757g	3.53926	1.82345	0.000129153	0.000529702	UP		some similarities with uniprot|O13547 Saccharomyces cerevisiae YLR390w-a SSR1 Secretory Stress Response protein 1	YLR390W-A	CCW14	Covalently linked cell wall glycoprotein, present in the inner layer of the cell wall		Flocculin type 3 repeat CFEM domain	SSR1	Beta-glucan associated cell-wall protein with role in cell wall structure; S/T rich protein, GPI anchor; similar mRNA abundance in yeast-form and germ tube; detected at germ tube plasma membrane by mass spec; similar to S. cerevisiae Ssr1p
YALI0B13640g	3.53574	1.82201	1.7496e-07	1.28798e-06	UP	RIM101	pH-response transcription factor pacC/RIM101	YHL027W	RIM101	Transcriptional repressor involved in response to pH and in cell wall construction; required for alkaline pH-stimulated haploid invasive growth and sporulation; activated by proteolytic processing; similar to A. nidulans PacC		Zinc finger, C2H2 type	RIM101	Transcription factor involved in alkaline pH response; required for alkaline-induced hyphal growth; role in virulence in mouse systemic infection; activated by C-terminal proteolytic cleavage; mediates both positive and negative regulation
YALI0F24651g	3.53293	1.82086	7.95343e-09	7.30176e-08	UP		similar to uniprot|P40086 Saccharomyces cerevisiae YER141W Cytochrome c oxidase assembly protein COX15	YER141W	COX15	Protein required for the hydroxylation of heme O to form heme A, which is an essential prosthetic group for cytochrome c oxidase		Cytochrome oxidase assembly protein	COX15	Cytochrome oxidase assembly protein; transcription is regulated by Nrg1p and Tup1p; alkaline downregulated
YALI0E23859g	3.53111	1.82012	0.000156521	0.000624216	UP		similar to uniprot|P38361 Saccharomyces cerevisiae YBR296c PHO89 Na+-coupled phosphate transport protein high affinity	YBR296C	PHO89	Na+/Pi cotransporter, active in early growth phase; similar to phosphate transporters of Neurospora crassa; transcription regulated by inorganic phosphate concentrations and Pho4p		Phosphate transporter family	PHO89	Putative phosphate permease; expression is regulated upon white-opaque switching; alkaline upregulated by Rim101p; induced upon biofilm formation; possibly adherence-induced
YALI0D02299g	3.52972	1.81955	1.6322e-08	1.43223e-07	UP		similar to uniprot|P08640 Saccharomyces cerevisiae YIR019c STA1 extracellular alpha-1, 4-glucan glucosidase, hypothetical start
YALI0C13926g	3.52049	1.81578	0.000175899	0.000690231	UP		weakly similar to uniprot|P24870 Saccharomyces cerevisiae YDL155w CLB3 cyclin G2/M-specific P6.2.f6.1	YDL155W	CLB3	B-type cyclin involved in cell cycle progression; activates Cdc28p to promote the G2/M transition; may be involved in DNA replication and spindle assembly; accumulates during S phase and G2, then targeted for ubiquitin-mediated degradation	SIMILAR TO	Cyclin, N-terminal domain Cyclin, C-terminal domain	CCN1	G1 cyclin; required for hyphal growth maintenance (not initiation); cell-cycle regulated transcription (G1/S); Cdc28p-Ccn1p initiates Cdc11p S394 phosphorylation on hyphal induction; expression in S. cerevisiae inhibits pheromone response
YALI0E30261g	3.51897	1.81515	0.00778562	0.0197139	UP		weakly similar to uniprot|P53122 Saccharomyces cerevisiae YGL138C Hypothetical 40.8 kDa protein in HUL5-SEC27 intergenic region, hypothetical start
YALI0E34881g	3.51671	1.81423	4.4499e-12	6.19159e-11	UP		similar to DEHA0F24211g Debaryomyces hansenii IPF 6233.1	YGR110W	CLD1	Mitochondrial cardiolipin-specific phospholipase; functions upstream of Taz1p to generate monolyso-cardiolipin; transcription increases upon genotoxic stress; involved in restricting Ty1 transposition; has homology to mammalian CGI-58	SIMILAR TO	Alpha/beta hydrolase family	orf19.7166	increased transcription is observed in an azole-resistant strain that overexpresses MDR1; transcriptionally activated by Mnl1p under weak acid stress
YALI0A16291g	3.51464	1.81338	3.52661e-05	0.000167198	UP		weakly similar to uniprot|Q06681 Saccharomyces cerevisiae YDR326c	YDR326C	YSP2	Protein involved in programmed cell death; mutant shows resistance to cell death induced by amiodarone or intracellular acidification		GRAM domain	orf19.4423	Putative glucosyltransferase; localized to the mitochondrial membrane
YALI0E26763g	3.51296	1.81269	0.0205605	0.0459285	UP		no similarity, hypothetical start
YALI0A19844g	3.50917	1.81113	3.52786e-06	2.05431e-05	UP		weakly similar to uniprot|Q01371 Neurospora crassa White collar 1 protein (WC1), hypothetical start					PAS fold PAS domain
YALI0F13321g	3.50339	1.80875	5.03286e-06	2.84717e-05	UP		some similarities with uniprot|Q7RXD3 Neurospora crassa NCU05051.1 hypothetical protein, hypothetical start					Fungal Zn(2)-Cys(6) binuclear cluster domain Fungal specific transcription factor domain
YALI0A19690g	3.50016	1.80742	5.68321e-09	5.38887e-08	UP		no similarity, hypothetical start					Life-span regulatory factor
YALI0D00649g	3.49702	1.80612	4.04392e-07	2.79554e-06	UP		similar to uniprot|P32317 Saccharomyces cerevisiae YEL052w AFG1 ATPase family gene	YEL052W	AFG1	Conserved protein that may act as a chaperone in the degradation of misfolded or unassembled cytochrome c oxidase subunits; localized to matrix face of the mitochondrial inner membrane; member of the AAA family but lacks a protease domain		AFG1-like ATPase	orf19.2891
YALI0A21131g	3.49642	1.80588	0.00452129	0.0123384	UP		weakly similar to uniprot|Q08912 Saccharomyces cerevisiae Chromosome XV reading frame ORF YOR389W	YOR389W		Putative protein of unknown function; expression regulated by copper levels
YALI0E20163g	3.4939	1.80484	5.60508e-05	0.000252368	UP		N-acetylglucosamine-6-phosphate deacetylase (EC 3.5.1.25) (GlcNAc 6-P deacetylase)					Amidohydrolase family	DAC1	N-acetylglucosamine-6-phosphate (GlcNAcP) deacetylase; enzyme of N-acetylglucosamine utilization; required for wild-type hyphal growth and virulence in mouse systemic infection; gene is GlcNAc-induced
YALI0F19580g	3.49373	1.80477	2.16903e-06	1.30987e-05	UP		some similarities with uniprot|Q03370 Saccharomyces cerevisiae YDR479c pex19	YDR479C	PEX29	Peroxisomal integral membrane peroxin, involved in the regulation of peroxisomal size, number and distribution; genetic interactions suggest that Pex28p and Pex29p act at steps upstream of those mediated by Pex30p, Pex31p, and Pex32p		Integral peroxisomal membrane peroxin	orf19.1933
YALI0E20911g	3.49222	1.80415	0.000124991	0.000514958	UP		some similarities to wi|NCU00270.1 Neurospora crassa NCU00270.1 predicted protein, hypothetical start
YALI0C09119g	3.48905	1.80283	1.26049e-05	6.60172e-05	UP		similar to uniprot|P14065 Saccharomyces cerevisiae YOR120W GCY protein	YBR149W	ARA1	NADP+ dependent arabinose dehydrogenase, involved in carbohydrate metabolism; purified as homodimer; naturally occurs with a N-terminus degradation product	SIMILAR TO	Aldo/keto reductase family
YALI0F17490g	3.48502	1.80117	1.3412e-06	8.44463e-06	UP		similar to uniprot|O74226 Candida albicans Cell wall synthesis protein KRE9 precursor	YJL174W	KRE9	Glycoprotein involved in cell wall beta-glucan assembly; null mutation leads to severe growth defects, aberrant multibudded morphology, and mating defects		Yeast cell wall synthesis protein KRE9/KNH1 Ser-Thr-rich glycosyl-phosphatidyl-inositol-anchored membrane family	KRE9	Protein of beta-1,6-glucan biosynthesis; required for serum-induced hyphal growth; required for efficient utilization of galactose and for growth on glucose; similar to S. cerevisiae Kre9p and Knh1p; O-glycosylated by Pmt1p
YALI0D24772g	3.47905	1.7987	5.23843e-09	5.00303e-08	UP		weakly similar to uniprot|P46996 Saccharomyces cerevisiae YJL163C Putative protein of unknown function, hypothetical start
YALI0B20966g	3.47021	1.79502	6.31089e-12	8.62217e-11	UP		similar to uniprot|Q07549 Saccharomyces cerevisiae YDL123W SNA4 Protein of unknown function, hypothetical start					Proteolipid membrane potential modulator	orf19.4132	UPF0057 protein family member; localized to the plasma membrane
YALI0F26213g	3.45081	1.78693	1.05181e-05	5.60113e-05	UP		similar to uniprot|Q9P457 Candida albicans Cu-binding metallothionein, start by similarity
YALI0E14146g	3.4426	1.7835	4.58654e-09	4.41489e-08	UP		some similarities with uniprot|Q96WV4 Schizosaccharomyces pombe SPBPJ4664.05 Unspecified membrane protein, hypothetical start					FAR-17a/AIG1-like protein
YALI0A08019g	3.44214	1.7833	4.84977e-08	3.91494e-07	UP		no similarity, hypothetical start					Histidine phosphatase superfamily (branch 1)
YALI0C01760g	3.43376	1.77979	1.88813e-09	1.91618e-08	UP		no similarity, hypothetical start
YALI0E05599g	3.43169	1.77892	4.10062e-07	2.82245e-06	UP		similar to uniprot|Q9Y7G7 Neurospora crassa NDH64 64 kDa mitochondrial NADH dehydrogenase	YMR145C	NDE1	Mitochondrial external NADH dehydrogenase, a type II NAD(P)H:quinone oxidoreductase that catalyzes the oxidation of cytosolic NADH; Nde1p and Nde2p provide cytosolic NADH to the mitochondrial respiratory chain	SIMILAR TO	Pyridine nucleotide-disulphide oxidoreductase EF hand
YALI0A12353g	3.43063	1.77847	1.42815e-06	8.91261e-06	UP		highly similar to uniprot|O93968 Candida boidinii Formate dehydrogenase	YOR388C	FDH1	NAD(+)-dependent formate dehydrogenase, may protect cells from exogenous formate	SIMILAR TO	D-isomer specific 2-hydroxyacid dehydrogenase, NAD binding domain D-isomer specific 2-hydroxyacid dehydrogenase, catalytic domain
YALI0E27203g	3.42663	1.77679	0.00664435	0.0173567	UP		similar to uniprot|P41948 Saccharomyces cerevisiae YNL142w MEP2	YNL142W	MEP2	Ammonium permease involved in regulation of pseudohyphal growth; belongs to a ubiquitous family of cytoplasmic membrane proteins that transport only ammonium (NH4+); expression is under the nitrogen catabolite repression regulation		Ammonium Transporter Family	MEP2	Ammonium permease and regulator of nitrogen starvation-induced filamentation; 11 predicted transmembrane regions; in low nitrogen cytoplasmic C-terminus activates Ras/cAMP and MAPK signal transduction pathways to induce filamentation
YALI0F03388g	3.42644	1.77671	1.0693e-06	6.83427e-06	UP		weakly similar to uniprot|Q9P5L6 Neurospora crassa NCU03905.1 related to AP-1-like transcription factor	YML007W	YAP1	Basic leucine zipper (bZIP) transcription factor required for oxidative stress tolerance; activated by H2O2 through the multistep formation of disulfide bonds and transit from the cytoplasm to the nucleus; mediates resistance to cadmium		Transcription factor PAP1 bZIP transcription factor	orf19.1623	CAP1	Transcription factor, AP-1 family; role in oxidative stress response and resistance, multidrug resistance; oxidative stress regulates nuclear localization; partially complements S. cerevisiae yap1 mutation; human neutrophil-induced
YALI0E34815g	3.41124	1.7703	2.36268e-11	3.04465e-10	UP		some similarities with uniprot|Q8X0B7 Neurospora crassa Related to phosphatidic acid-preferring phospholipase A1 no start	YOR022C		Protein with similarity to bovine phospholipase A1; the authentic, non-tagged protein is detected in highly purified mitochondria in high-throughput studies	SIMILAR TO	DDHD domain
YALI0F09053g	3.40855	1.76916	6.94811e-09	6.46286e-08	UP		weakly similar to DEHA0E12738g Debaryomyces hansenii and ca|CA0222|IPF12141 Candida albicans, hypothetical start						orf19.1953	not essential for viability; merged with orf19.1952 in Assembly 21
YALI0E17127g	3.40551	1.76787	1.27351e-10	1.5208e-09	UP		weakly similar to uniprot|Q7SFJ8 Neurospora crassa NCU08621.1	YDR003W	RCR2	Vacuolar protein that presumably functions within the endosomal-vacuolar trafficking pathway, affecting events that determine whether plasma membrane proteins are degraded or routed to the plasma membrane; similar to Rcr1p		Chitin synthesis regulation, resistance to Congo red
YALI0B16522g	3.39413	1.76304	6.23975e-07	4.12928e-06	UP		similar to uniprot|P19145 Saccharomyces cerevisiae YKR039w GAP1 general amino acid permease	YKR039W	GAP1	General amino acid permease; localization to the plasma membrane is regulated by nitrogen source		Amino acid permease	GAP2	Protein similar to amino acid permeases; ketoconazole, flucytosine repressed; induced by histidine, and induction requires Ssy1p; regulated by Nrg1p, Tup1p; shows colony morphology-related gene regulation by Ssn6p
YALI0C14784g	3.39317	1.76264	2.19061e-11	2.83441e-10	UP		weakly similar to uniprot|P21957 Saccharomyces cerevisiae YHL020c OPI1 ( regulator of phospholipid biosynthesis pathway)	YHL020C	OPI1	Transcriptional regulator of a variety of genes; phosphorylation by protein kinase A stimulates Opi1p function in negative regulation of phospholipid biosynthetic genes; involved in telomere maintenance		Transcription factor Opi1
YALI0C15092g	3.38992	1.76125	1.1202e-10	1.3453e-09	UP		some similarities with uniprot|P41913 Saccharomyces cerevisiae YOR355W GDS1 Protein of unknown function, required for growth on glycerol as a carbon source, hypothetical start
YALI0E35024g	3.38579	1.75949	8.57886e-10	9.25323e-09	UP		weakly similar to uniprot|P25338 Saccharomyces cerevisiae YGL010W					Protein of unknown function (DUF962)	orf19.1477
YALI0F16401g	3.38201	1.75788	2.20445e-09	2.21648e-08	UP		weakly similar to uniprot|P22580 Saccharomyces cerevisiae YDR242w AMD2 amidase	YDR242W	AMD2	Putative amidase		Amidase	orf19.5536
YALI0B04290g	3.38044	1.75721	0.000286436	0.00106666	UP		weakly similar to uniprot|P38148 Saccharomyces cerevisiae YBR276c PPS1 protein tyrosine phosphatase	YBR276C	PPS1	Protein phosphatase with specificity for serine, threonine, and tyrosine residues; has a role in the DNA synthesis phase of the cell cycle		Dual specificity phosphatase, catalytic domain	orf19.7033	Putative dual specificity protein phosphatase, similar to S. cerevisiae Pps1p
YALI0D16379g	3.37921	1.75668	2.69684e-11	3.44036e-10	UP		Patatin-like phospholipase domain-containing protein YALI0D16379g (EC 3.1.1.-)	YKR089C	TGL4	Triacylglycerol lipase involved in triacylglycerol mobilization and degradation; found in lipid particles; phosphorylated and activated by Cdc28p; required with Tgl3p for timely bud formation	SIMILAR TO	Patatin-like phospholipase Domain of unknown function (DUF3336)	orf19.1504	Putative patatin-like phospholipase; fungal-specific (no human or murine homolog)
YALI0C04796g	3.37827	1.75628	7.15572e-11	8.74236e-10	UP		weakly similar to uniprot|P46996 Saccharomyces cerevisiae YJL163c	YJL163C		Putative protein of unknown function		Major Facilitator Superfamily	orf19.6976	Predicted membrane transporter; member of the proton coupled folate transporter/heme carrier protein (PCFT/HCP) family, major facilitator superfamily (MFS); virulence-group-correlated expression
YALI0C09904g	3.37751	1.75596	6.12032e-11	7.53535e-10	UP		no similarity, hypothetical start					Protein of unknown function (DUF3210)
YALI0C10714g	3.37377	1.75436	9.46371e-11	1.1452e-09	UP		no similarity, hypothetical start					AMP-binding enzyme
YALI0D08778g	3.37066	1.75303	3.73032e-10	4.19446e-09	UP		similar to uniprot|P53183 Saccharomyces cerevisiae YGL039w	YGL039W		Oxidoreductase shown to reduce carbonyl compounds to chiral alcohols	SIMILAR TO	NAD dependent epimerase/dehydratase family
YALI0F00704g	3.36981	1.75267	0.00167277	0.00511902	UP		no similarity, hypothetical start
YALI0A00212g	3.35359	1.74571	1.39638e-06	8.74085e-06	UP		no similarity, hypothetical start
YALI0E10571g	3.35038	1.74432	3.63096e-11	4.56782e-10	UP		Lipoyl synthase, mitochondrial (EC 2.8.1.8) (Lipoate synthase) (LS) (Lip-syn) (Lipoic acid synthase)	YOR196C	LIP5	Protein involved in biosynthesis of the coenzyme lipoic acid, has similarity to E. coli lipoic acid synthase		Radical SAM superfamily	LAB5
YALI0C19283g	3.34145	1.74047	0.000919651	0.00301628	UP		similar to uniprot|Q06537 Saccharomyces cerevisiae YPR153W Hypothetical protein	YPR153W		Putative protein of unknown function			orf19.351
YALI0B03168g	3.34139	1.74045	3.78003e-07	2.62454e-06	UP		pesudogene
YALI0D24830g	3.3345	1.73747	3.36079e-09	3.30002e-08	UP		weakly similar to uniprot|Q6C7X6 Yarrowia lipolytica YALI0D24830g, start by similarity					DnaJ domain
YALI0E03564g	3.33328	1.73694	3.82334e-05	0.000180057	UP		no similarity, hypothetical start
YALI0F25619g	3.32703	1.73423	1.55268e-07	1.15641e-06	UP		weakly similar to uniprot|P36032 Saccharomyces cerevisiae YKL221w MCH2 transporter or uniprot|P53918 Saccharomyces cerevisiae YNL125c ESBP6 transporter	YKL221W	MCH2	Protein with similarity to mammalian monocarboxylate permeases, which are involved in transport of monocarboxylic acids across the plasma membrane; mutant is not deficient in monocarboxylate transport		Major Facilitator Superfamily
YALI0E04114g	3.32283	1.73241	5.87346e-05	0.000263146	UP		weakly similar to uniprot|Q03162 Saccharomyces cerevisiae YMR100w MUB1 involved in budding	YMR100W	MUB1	Protein that interacts with E2 and E3 enzymes Ubr2p and Rad6p and is required for ubiquitylation and degradation of Rpn4p; contains a MYND domain (residues 512 to 555); has a short half-life; has similarity to Aspergillus nidulans samB gene		MYND finger	MUB1	Protein not essential for viability; similar to S. cerevisiae Mub1p, which has a role in regulation of budding
YALI0C20757g	3.31753	1.73011	9.36282e-10	1.00476e-08	UP		similar to uniprot|Q12200 Saccharomyces cerevisiae YPL006W NCR1	YPL006W	NCR1	Vacuolar membrane protein that transits through the biosynthetic vacuolar protein sorting pathway, involved in sphingolipid metabolism; glycoprotein and functional orthologue of human Niemann Pick C1 (NPC1) protein		Sterol-sensing domain of SREBP cleavage-activation Patched family	NCR1	Transcription is regulated by Nrg1p and Mig1p; increased expression in response to prostaglandins
YALI0D19756g	3.30782	1.72588	1.60721e-06	9.91319e-06	UP		weakly similar to uniprot|O14035 Schizosaccharomyces pombe NCS1 uracil transporter	YIR028W	DAL4	Allantoin permease; expression sensitive to nitrogen catabolite repression and induced by allophanate, an intermediate in allantoin degradation	SIMILAR TO	Permease for cytosine/purines, uracil, thiamine, allantoin
YALI0E20735g	3.30464	1.72449	1.05668e-10	1.27224e-09	UP		similar to CA1197|CaIFG1 Candida albicans, hypothetical start					FAD dependent oxidoreductase	DAO2	Putative D-amino acid oxidase
YALI0E34463g	3.30251	1.72356	0.00445555	0.0121799	UP		some similarities with wi|NCU06697.1 Neurospora crassa NCU06697.1 hypothetical protein (67439 - 69758), hypothetical start					Calcineurin-like phosphoesterase
YALI0E18766g	3.3021	1.72339	0.000421316	0.00150456	UP		similar to uniprot|Q6CE49 Yarrowia lipolytica YALI0B18568g, start by similarity
YALI0E17633g	3.29773	1.72147	6.16526e-08	4.87349e-07	UP		similar to uniprot|P32604 Saccharomyces cerevisiae YJL155c FBP26 fructose-2 6-bisphosphatase	YJL155C	FBP26	Fructose-2,6-bisphosphatase, required for glucose metabolism		Histidine phosphatase superfamily (branch 1) 6-phosphofructo-2-kinase
YALI0D06171g	3.29769	1.72146	8.82088e-12	1.19742e-10	UP		no similarity, hypothetical start
YALI0E08932g	3.29741	1.72133	0.000193869	0.000753304	UP		no similarity, hypothetical start
YALI0E29843g	3.29642	1.7209	4.20143e-09	4.07134e-08	UP		similar to uniprot|P53158 Saccharomyces cerevisiae YGL079w hypothetical protein singleton, hypothetical start					Uncharacterized conserved protein
YALI0F07645g	3.29565	1.72056	3.05859e-09	3.03139e-08	UP		no similarity, hypothetical start
YALI0F20812g	3.29513	1.72033	6.56396e-10	7.20221e-09	UP		weakly similar to uniprot|Q8BWR2 Mus musculus TRP26, hypothetical start					PITH domain	orf19.904
YALI0E28809g	3.28891	1.71761	1.01294e-09	1.07793e-08	UP		some similarities with DEHA0D08514g Debaryomyces hansenii IPF 1492.1, hypothetical start					Zinc finger, C3HC4 type (RING finger) SPX domain	orf19.1971
YALI0F09251g	3.28843	1.7174	1.20083e-12	1.77416e-11	UP		Uricase (EC 1.7.3.3) (Urate oxidase)					Uricase	orf19.2114
YALI0F28611g	3.28793	1.71718	3.61335e-08	2.98901e-07	UP		no similarity, hypothetical start
YALI0C14190g	3.2705	1.70951	8.86006e-05	0.000379567	UP		similar to uniprot|P33336 Saccharomyces cerevisiae YGR143w SKN1 glucan synthase subunit P2.4.f2.1 and uniprot|P32486 Saccharomyces cerevisiae YPR159w KRE6 glucan synthase subunit P2.4.f2.1 associated protein	YPR159W	KRE6	Protein required for beta-1,6 glucan biosynthesis; putative beta-glucan synthase; appears functionally redundant with Skn1p		Beta-glucan synthesis-associated protein (SKN1)	KRE6	Protein of beta-1,6-glucan synthesis; essential; type II membrane protein; N-glycosylation sites; change in mRNA length, but not mRNA abundance, at yeast-hyphal transition; alkaline upregulated by Rim101p; induced on cell wall regeneration
YALI0D04466g	3.26889	1.7088	5.41411e-07	3.62825e-06	UP		weakly similar to uniprot|Q9Y8B4 Emericella nidulans Positive sulphur transcription regulator METR, hypothetical start					Basic region leucine zipper	MET28	Protein induced during the mating process; possibly an essential gene, disruptants not obtained by UAU1 method
YALI0F02035g	3.26089	1.70527	7.47167e-09	6.90062e-08	UP		some similarities with uniprot|Q01846 Saccharomyces cerevisiae YML104c MDM1 intermediate filament protein	YML104C	MDM1	Intermediate filament protein, required for nuclear and mitochondrial transmission to daughter buds; contains a Phox homology (PX) domain and specifically binds phosphatidylinositol 3-phosphate (PtdIns-3-P)		Sorting nexin C terminal Regulator of G protein signaling domain PXA domain PX domain
YALI0F12397g	3.26054	1.70511	3.1964e-05	0.000152682	UP	RIM21	pH-response regulator protein palH/RIM21	YNL294C	RIM21	Component of the RIM101 pathway, has a role in cell wall construction and alkaline pH response; has similarity to A. nidulans PalH		PalH/RIM21
YALI0F02057g	3.25283	1.7017	0.00970691	0.0239301	UP		no similarity, hypothetical start
YALI0F05786g	3.2408	1.69635	1.81741e-06	1.11233e-05	UP		similar to uniprot|Q6CAJ2 Yarrowia lipolytica YALI0D02299g, hypothetical start
YALI0A20416g	3.23917	1.69562	3.04167e-09	3.01933e-08	UP		weakly similar to uniprot|Q08919 Saccharomyces cerevisiae YPL176c SSP134 related to transferrin receptor protein	YPL176C	TRE1	Plasma membrane protein that binds to Bsd2p and regulates ubiquitylation and vacuolar degradation of the metal transporter Smf1p; function is redundant with that of Tre2p; has similarity to transferrin receptors		Transferrin receptor-like dimerisation domain PA domain	orf19.374	overlaps orf19.372
YALI0D16357g	3.23576	1.6941	2.49743e-11	3.19883e-10	UP	PFK1	6-phosphofructokinase subunit alpha (EC 2.7.1.11) (6PF-1-K subunit alpha) (Phosphofructokinase 1) (Phosphohexokinase)	YMR205C	PFK2	Beta subunit of heterooctameric phosphofructokinase involved in glycolysis, indispensable for anaerobic growth, activated by fructose-2,6-bisphosphate and AMP, mutation inhibits glucose induction of cell cycle-related genes		Phosphofructokinase	PFK2	Beta subunit of phosphofructokinase (PFK), which is a heteromultimer of Pfk1p and Pfk2p; PFK is activated by fructose 2,6-bisphosphate or AMP, inhibited by ATP; downregulated upon phagocytosis or hyphal growth; fluconazole-induced
YALI0E31196g	3.23444	1.69352	2.40599e-10	2.78928e-09	UP		weakly similar to wi|NCU03263.1 Neurospora crassa NCU03263.1	YOR086C	TCB1	Lipid-binding protein containing three calcium and lipid binding domains; non-tagged protein localizes to mitochondria and GFP-fusion protein localizes to the cell periphery; C-termini of Tcb1p, Tcb2p and Tcb3p interact		C2 domain	orf19.1840
YALI0A04917g	3.21276	1.68382	2.04898e-10	2.39727e-09	UP		similar to uniprot|P40088 Saccharomyces cerevisiae YER145c FTR1 iron permease that mediates high-affinity iron uptake	YBR207W	FTH1	Putative high affinity iron transporter involved in transport of intravacuolar stores of iron; forms complex with Fet5p; expression is regulated by iron; proposed to play indirect role in endocytosis		Iron permease FTR1 family
YALI0B04510g	3.20739	1.6814	1.1831e-09	1.24647e-08	UP		weakly similar to uniprot|P33417 Saccharomyces cerevisiae YKL032c IXR1 intrastrand crosslink recognition protein and transcription factor, hypothetical start					Fungal Zn(2)-Cys(6) binuclear cluster domain	WOR2	Transcriptional regulator of white-opaque switching; required for maintenance of opaque state
YALI0D05137g	3.19874	1.67751	2.1605e-08	1.87509e-07	UP		weakly similar to gi|41629679 Saccharomyces cerevisiae YBR255ca, start by similarity
YALI0D07546g	3.18608	1.67178	1.94419e-07	1.42134e-06	UP		some similarities with uniprot|Q8PCT1 Xanthomonas campestris DNA repair system specific for alkylated DNA, hypothetical start					2OG-Fe(II) oxygenase superfamily
YALI0D04048g	3.18273	1.67026	7.25929e-09	6.7326e-08	UP	SHO1	High osmolarity signaling protein SHO1 (Osmosensor SHO1)	YER118C	SHO1	Transmembrane osmosensor, participates in activation of both the Cdc42p- and MAP kinase-dependent filamentous growth pathway and the high-osmolarity glycerol response pathway		SH3 domain	SSU81	Predicted adaptor protein involved in activation of MAP kinase-dependent signaling pathways; links response to oxidative stress to morphogenesis and cell wall biosynthesis; caspofungin repressed
YALI0A15257g	3.17745	1.66787	0.000245791	0.000936717	UP		no similarity, hypothetical start					Whi5 like
YALI0D16445g	3.17711	1.66772	4.62314e-10	5.13475e-09	UP		weakly similar to uniprot|O94461 Schizosaccharomyces pombe Putative phosphoglycerate mutase, start by similarity					Histidine phosphatase superfamily (branch 1)	orf19.6056
YALI0F19866g	3.17145	1.66514	2.4414e-10	2.82004e-09	UP		similar to uniprot|P19145 Saccharomyces cerevisiae General amino-acid permease GAP1 YKR039w	YKR039W	GAP1	General amino acid permease; localization to the plasma membrane is regulated by nitrogen source	SIMILAR TO	Amino acid permease	HIP1	Alkaline upregulated; flucytosine induced; regulated by Plc1p, Gcn2p and Gcn4p; fungal-specific (no human or murine homolog)
YALI0C06732g	3.17096	1.66492	3.41225e-10	3.878e-09	UP		weakly similar to uniprot|Q8X0A9 Neurospora crassa Conserved hypothetical protein, hypothetical start					alpha/beta hydrolase fold	orf19.7237
YALI0C04477g	3.16133	1.66053	0.00334698	0.00942944	UP		similar to uniprot|P38124 Saccharomyces cerevisiae YBR008c FLR1 fluconazole resistance protein	YBR008C	FLR1	Plasma membrane multidrug transporter of the major facilitator superfamily, involved in efflux of fluconazole, diazaborine, benomyl, methotrexate, and other drugs; expression induced in cells treated with the mycotoxin patulin	SIMILAR TO	Major Facilitator Superfamily
YALI0D20944g	3.16132	1.66053	5.39016e-08	4.29657e-07	UP		similar to uniprot|Q12016 Saccharomyces cerevisiae Hypothetical protein YOL129W	YOL129W	VPS68	Vacuolar membrane protein of unknown function involved in vacuolar protein sorting; also detected in the mitochondria		Uncharacterised protein family (UPF0220)	orf19.3458
YALI0B09141g	3.15993	1.65989	0.00120774	0.00383448	UP		no similarity, hypothetical start
YALI0B04026g	3.15141	1.656	1.49586e-08	1.32541e-07	UP		some similarities with uniprot|Q12255 Saccharomyces cerevisiae YLR093c NYV1 v-SNARE, vacuolar synaptobrevin, hypothetical start					Synaptobrevin Regulated-SNARE-like domain	orf19.2089
YALI0F03157g	3.15071	1.65568	0.000266605	0.00100176	UP		some similarities with uniprot|Q12041 Saccharomyces cerevisiae YDR253c MET32 transcriptional regulator of sulfur amino acid metabolism, hypothetical start					Zinc-finger double domain	orf19.1757	Putative transcription factor with zinc finger DNA-binding motif; transcription is upregulated in clinical isolates from HIV+ patients with oral candidiasis
YALI0E19338g	3.1499	1.65531	4.00925e-07	2.78026e-06	UP		similar to uniprot|Q12691 Saccharomyces cerevisiae YDR038c ENA5 P-type ATPase involved in Na+ efflux	YDR038C	ENA5	Protein with similarity to P-type ATPase sodium pumps, member of the Na+ efflux ATPase family	SIMILAR TO	haloacid dehalogenase-like hydrolase E1-E2 ATPase Cation transporting ATPase, C-terminus Cation transporter/ATPase, N-terminus
YALI0E23155g	3.14705	1.654	3.59046e-11	4.52583e-10	UP	CPR2	Peptidyl-prolyl cis-trans isomerase B (PPIase B) (EC 5.2.1.8) (Rotamase B)	YDR304C	CPR5	Peptidyl-prolyl cis-trans isomerase (cyclophilin) of the endoplasmic reticulum, catalyzes the cis-trans isomerization of peptide bonds N-terminal to proline residues; transcriptionally induced in response to unfolded proteins in the ER		Cyclophilin type peptidyl-prolyl cis-trans isomerase/CLD	CYP5	Protein described as a peptidyl-prolyl cis-trans isomerase; macrophage-downregulated protein level; protein level decreased in stationary phase cultures; predicted endoplasmic reticulum (ER) localization
YALI0E10175g	3.14544	1.65326	1.4741e-08	1.30795e-07	UP		weakly similar to uniprot|Q12303 Saccharomyces cerevisiae YLR121c YPS3 GPI-anchored aspartyl protease 3 (yapsin 3)	YLR121C	YPS3	Aspartic protease, attached to the plasma membrane via a glycosylphosphatidylinositol (GPI) anchor		Eukaryotic aspartyl protease
YALI0E22198g	3.13985	1.6507	0.00178817	0.00540706	UP		similar to uniprot|Q8TF96 Aspergillus oryzae Chitin synthase	YBR023C	CHS3	Chitin synthase III, catalyzes the transfer of N-acetylglucosamine (GlcNAc) to chitin; required for synthesis of the majority of cell wall chitin, the chitin ring during bud emergence, and spore wall chitosan	SIMILAR TO	Myosin head (motor domain) DEK C terminal domain Cytochrome b5-like Heme/Steroid binding domain Chitin synthase
YALI0D06237g	3.12512	1.64391	2.20352e-10	2.57334e-09	UP		similar to uniprot|O59715 Schizosaccharomyces pombe Putative fatty acid desaturase, hypothetical start					Sphingolipid Delta4-desaturase (DES) Fatty acid desaturase	DES1	Putative delta-4 sphingolipid desaturase
YALI0E02156g	3.12409	1.64344	4.68096e-08	3.79798e-07	UP		similar to uniprot|Q99271 Saccharomyces cerevisiae YLR138w NHA1 putative Na+/H+ antiporter possible transmembrane segments	YLR138W	NHA1	Na+/H+ antiporter involved in sodium and potassium efflux through the plasma membrane; required for alkali cation tolerance at acidic pH	SIMILAR TO	Sodium/hydrogen exchanger family
YALI0E34771g	3.12351	1.64317	0.00468446	0.0127235	UP		weakly similar to uniprot|P22580 Saccharomyces cerevisiae YDR242w AMD2 amidase	YDR242W	AMD2	Putative amidase	SIMILAR TO	Amidase	orf19.5169
YALI0C06798g	3.11834	1.64078	4.50767e-11	5.61514e-10	UP	GLC3	1,4-alpha-glucan-branching enzyme (EC 2.4.1.18) (Glycogen-branching enzyme)	YEL011W	GLC3	Glycogen branching enzyme, involved in glycogen accumulation; green fluorescent protein (GFP)-fusion protein localizes to the cytoplasm in a punctate pattern		Carbohydrate-binding module 48 (Isoamylase N-terminal domain) Alpha amylase, catalytic domain Alpha amylase, C-terminal all-beta domain	GLC3	Protein described as similar to 1,4-glucan branching enzyme; fluconazole-induced; shows colony morphology-related gene regulation by Ssn6p; protein detected by mass spectometry in stationary phase cultures
YALI0A09658g	3.11799	1.64061	9.21296e-09	8.3376e-08	UP		weakly similar to uniprot|P07834 Saccharomyces cerevisiae YFL009w CDC4 cell division control protein	YFL009W	CDC4	F-box protein required for G1/S and G2/M transition, associates with Skp1p and Cdc53p to form a complex, SCFCdc4, which acts as ubiquitin-protein ligase directing ubiquitination of the phosphorylated CDK inhibitor Sic1p	SIMILAR TO	WD domain, G-beta repeat F-box-like
YALI0D20658g	3.11747	1.64038	0.0025098	0.00729862	UP		no similarity, hypothetical start
YALI0B08272g	3.11545	1.63944	0.00180532	0.00544854	UP		some similarities with uniprot|P08965 Schizosaccharomyces pombe Meiosis protein mei2	YNL047C	SLM2	Phosphoinositide PI4,5P(2) binding protein, forms a complex with Slm1p; acts downstream of Mss4p in a pathway regulating actin cytoskeleton organization in response to stress; phosphorylated by the TORC2 complex	SIMILAR TO
YALI0C01441g	3.11436	1.63894	2.59709e-08	2.21467e-07	UP		weakly similar to uniprot|O42997 Schizosaccharomyces pombe Hypothetical 33.6 kDa protein, hypothetical start					Protein of unknown function (DUF1640)	orf19.811	Protein not essential for viability
YALI0E23925g	3.11357	1.63857	1.40682e-08	1.25176e-07	UP		weakly similar to DEHA0F18623g Debaryomyces hansenii, hypothetical start						AAF1	Possible regulatory protein; Glu-rich domain; production in S. cerevisiae increases endothelial cell adherence and flocculence; expressed under diverse conditions, detected in yeast-form and hyphal cells; alkaline or caspofungin upregulated
YALI0F12573g	3.11118	1.63746	3.99948e-06	2.30151e-05	UP		some similarities with uniprot|Q03761 Saccharomyces cerevisiae YDR145w TAF61 TFIID and SAGA, hypothetical start					Rab-GTPase-TBC domain
YALI0E04532g	3.10873	1.63632	3.32775e-10	3.80237e-09	UP		no similarity, hypothetical start
YALI0B15972g	3.10688	1.63546	7.5889e-08	5.93017e-07	UP		weakly similar to uniprot|P47014 Saccharomyces cerevisiae YJL132w weak similarity to human phospholipase D singleton	YJL132W		Putative protein of unknown function; localizes to the membrane fraction; possible Zap1p-regulated target gene induced by zinc deficiency; YJL132W is a non-essential gene		Zinc dependent phospholipase C
YALI0C20141g	3.10606	1.63508	1.54451e-09	1.59032e-08	UP		similar to uniprot|Q05776 Saccharomyces cerevisiae YLR193c Similar to MSF1 protein	YLR193C	UPS1	Mitochondrial intermembrane space protein that regulates mitochondrial cardiolipin levels, null has defects in Mgm1p processing, integrity of mitochondrial inner membrane complexes, and mitochondrial morphology; ortholog of human PRELI		PRELI-like family
YALI0A21307g	3.10036	1.63244	1.05736e-10	1.27224e-09	UP		similar to uniprot|P25297 Saccharomyces cerevisiae YML123c PHO84 high-affinity inorganic phosphate/H+ symporter	YML123C	PHO84	High-affinity inorganic phosphate (Pi) transporter and low-affinity manganese transporter; regulated by Pho4p and Spt7p; mutation confers resistance to arsenate; exit from the ER during maturation requires Pho86p	SIMILAR TO	Sugar (and other) transporter	PHO84	Protein similar to high-affinity phosphate transporters; expression is regulated upon white-opaque switching or biofilm formation; Hog1p, ciclopirox olamine or alkaline induced; caspofungin or stress repressed; upregulated in RHE model
YALI0E29689g	3.09853	1.63158	0.00873293	0.0218169	UP	IRS4	Increased rDNA silencing protein 4	YKR019C	IRS4	EH domain-containing protein involved in regulating phosphatidylinositol 4,5-bisphosphate levels and autophagy; Irs4p and Tax4p bind and activate the PtdIns phosphatase Inp51p; Irs4p and Tax4p are involved in localizing Atg17p to the PAS		Cytoskeletal-regulatory complex EF hand	IRS4	Protein with roles in cell wall integrity, systemic (but not oral) murine infection, adherence, hyphal growth, and agar-embedded filamentous growth; antigenic in human infection; similar to S. cerevisiae Irs4p
YALI0E18414g	3.0934	1.6292	3.53934e-10	3.99386e-09	UP	SEC9	Protein transport protein SEC9	YMR017W	SPO20	Meiosis-specific subunit of the t-SNARE complex, required for prospore membrane formation during sporulation; similar to but not functionally redundant with Sec9p; SNAP-25 homolog	SIMILAR TO	SNARE domain	orf19.117
YALI0A16214g	3.08951	1.62738	0.000321592	0.00117757	UP		weakly similar to uniprot|P53832 Saccharomyces cerevisiae YNL283C WSC2 (ohnolog of YOL105C) Partially redundant sensor-transducer of the stress-activated PKC1-MPK1 signaling pathway involved in maintenance of cell wall integrity and recovery from heat shock					WSC domain
YALI0D05621g	3.08866	1.62698	1.06735e-07	8.1443e-07	UP		similar to uniprot|Q04895 Saccharomyces cerevisiae YIR028w DAL4 allantoin permease	YBR021W	FUR4	Uracil permease, localized to the plasma membrane; expression is tightly regulated by uracil levels and environmental cues		Permease for cytosine/purines, uracil, thiamine, allantoin	DAL4	Putative allantoin permease; fungal-specific (no human or murine homolog)
YALI0F27203g	3.08664	1.62604	4.96924e-11	6.16594e-10	UP		no similarity, hypothetical start
YALI0D13552g	3.08487	1.62521	0.00135836	0.00424897	UP		weakly similar to uniprot|Q12361 Saccharomyces cerevisiae YDL035c GPR1 G-protein coupled receptor	YDL035C	GPR1	Plasma membrane G protein coupled receptor (GPCR) that interacts with the heterotrimeric G protein alpha subunit, Gpa2p, and with Plc1p; sensor that integrates nutritional signals with the modulation of cell fate via PKA and cAMP synthesis	SIMILAR TO	G protein-coupled glucose receptor regulating Gpa2 C-term G protein-coupled glucose receptor regulating Gpa2	GPR1	Putative G-protein-coupled receptor of plasma membrane; required for wild-type hyphal growth; acts in cAMP-PKA pathway; reports differ on role in cAMP-mediated glucose signaling; Gpr1p C terminus binds Gpa2p; regulates HWP1 and ECE1
YALI0F16852g	3.07422	1.62022	0.00301664	0.00860177	UP		no similarity, hypothetical start					Homeobox domain
YALI0F00858g	3.06052	1.61378	0.00490647	0.0132585	UP		weakly similar to uniprot|P38590 Saccharomyces cerevisiae YNL053w MSG5 dual-specifity protein phosphatase	YNL053W	MSG5	Dual-specificity protein phosphatase; exists in 2 isoforms; required for maintenance of a low level of signaling through the cell integrity pathway, adaptive response to pheromone; regulates and is regulated by Slt2p; dephosphorylates Fus3p		Dual specificity phosphatase, catalytic domain	CPP1	MAPK phosphatase of the VH1 family; regulates Cst20p-Hst7p-Cek1p-Cph1p hyphal growth pathway; required for wild-type virulence in mouse systemic infection; C516 is active site Cys; antigenic in human thrush; more mRNA in yeast than hyphae
YALI0F09273g	3.05403	1.61071	6.95942e-10	7.60763e-09	UP		similar to uniprot|P43550 Saccharomyces cerevisiae YFL053w DAK2 Dihydroxyacetone kinase 2 or uniprot|P54838 Saccharomyces cerevisiae YML070w DAK1 dihydroxyacetone kinase and DEHA0A03971g Debaryomyces hansenii	YFL053W	DAK2	Dihydroxyacetone kinase, required for detoxification of dihydroxyacetone (DHA); involved in stress adaptation		DAK2 domain Dak1 domain	DAK2	Protein described as similar to dihydroxyacetone kinase; transcription is decreased upon yeast-hyphal switch; fluconazole-induced; caspofungin repressed; protein detected by mass spec in stationary phase cultures
YALI0F24431g	3.05231	1.6099	2.3859e-10	2.77271e-09	UP		weakly similar to uniprot|P53721 Saccharomyces cerevisiae YNR018w	YNR018W	AIM38	Putative protein of unknown function; non-tagged protein is detected in purified mitochondria; may interact with respiratory chain complex IV; null mutant is viable and displays reduced frequency of mitochondrial genome loss	SIMILAR TO		orf19.1691	Plasma-membrane-localized protein; fluconazole-induced; filament induced; Hog1p-, ketoconazole- and hypoxia-induced; regulated by Nrg1p, Tup1p, Upc2p; increased expression in response to prostaglandins
YALI0F21901g	3.05093	1.60925	4.92716e-08	3.95735e-07	UP		some similarities with uniprot|Q7S199 Neurospora crassa NCU07521.1 hypothetical protein	YIL046W	MET30	F-box protein containing five copies of the WD40 motif, controls cell cycle function, sulfur metabolism, and methionine biosynthesis as part of the ubiquitin ligase complex; interacts with and regulates Met4p, localizes within the nucleus	SIMILAR TO	WD domain, G-beta repeat F-box-like
YALI0B06985g	3.05006	1.60884	2.41236e-08	2.0823e-07	UP		no similarity, hypothetical start
YALI0A14366g	3.04927	1.60846	4.06692e-05	0.000190539	UP		no similarity, hypothetical start					Domain of unknown function (DUF202)
YALI0E29645g	3.04802	1.60787	3.68499e-07	2.56979e-06	UP		similar to DEHA0E24420g Debaryomyces hansenii IPF 11008.1	YNL275W	BOR1	Boron efflux transporter of the plasma membrane; binds HCO3-, I-, Br-, NO3- and Cl-; has similarity to the characterized boron efflux transporter A. thaliana BOR1		HCO3- transporter family	orf19.2898
YALI0D04202g	3.04441	1.60616	2.59036e-08	2.21191e-07	UP	GPI10	GPI mannosyltransferase 3 (EC 2.4.1.-) (GPI mannosyltransferase III) (GPI-MT-III) (Glycosylphosphatidylinositol-anchor biosynthesis protein 10)	YGL142C	GPI10	Integral membrane protein involved in glycosylphosphatidylinositol (GPI) anchor synthesis; putative alpha 1,2 mannosyltransferase required for addition of the third mannose onto the GPI core structure; human PIG-Bp is a functional homolog		Alg9-like mannosyltransferase family	orf19.3996	Putative mannosyltransferase; similar to S. cerevisiae Gpi10p; has HKEXRF motif
YALI0F22451g	3.04088	1.60449	3.34732e-09	3.29188e-08	UP		some similarities with KLLA-IPF2219.1 Kluyveromyces lactis, hypothetical start					Protein of unknown function (DUF3602)	orf19.1107
YALI0F17886g	3.03949	1.60383	0.000485667	0.00171033	UP		some similarities with uniprot|P43574 Saccharomyces cerevisiae YFL021w GAT1 transcription factor for nitrogen regulation	YFL021W	GAT1	Transcriptional activator of genes involved in nitrogen catabolite repression; contains a GATA-1-type zinc finger DNA-binding motif; activity and localization regulated by nitrogen limitation and Ure2p		GATA zinc finger	GLN3	GATA transcription factor involved in regulation of filamentous growth induced by nitrogen starvation; regulates transcription of Mep2p ammonium permease; regulated by Gcn2p and Gcn4p; mRNA binds to She3p
YALI0E01386g	3.03788	1.60306	2.66441e-07	1.90834e-06	UP		no similarity, hypothetical start
YALI0D07392g	3.03472	1.60156	0.00401027	0.0110771	UP		similar to uniprot|P53099 Saccharomyces cerevisiae YGL186c	YGL186C	TPN1	Plasma membrane pyridoxine (vitamin B6) transporter; member of the purine-cytosine permease subfamily within the major facilitator superfamily; proton symporter with similarity to Fcy21p, Fcy2p, and Fcy22p		Permease for cytosine/purines, uracil, thiamine, allantoin	FCY23	Putative transporter; Gcn4p-regulated; more similar to S. cerevisiae Tpn1p, which is a vitamin B6 transporter, than to purine-cytosine permeases
YALI0B22814g	3.03086	1.59973	1.50928e-09	1.5591e-08	UP		weakly similar to uniprot|Q9P904 Emericella nidulans PalH	YNL294C	RIM21	Component of the RIM101 pathway, has a role in cell wall construction and alkaline pH response; has similarity to A. nidulans PalH	SIMILAR TO	PalH/RIM21	RIM21	Protein involved in the pH response pathway; required for activation of the transcription factor Rim101p and for alkaline pH-induced hyphal growth; may function as a sensor of alkaline pH
YALI0F17798g	3.02251	1.59575	3.27259e-09	3.22337e-08	UP		weakly similar to uniprot|P53584 Saccharomyces cerevisiae YNL237w YTP1 weak similarity to mitochondrial electron transport proteins	YNL237W	YTP1	Probable type-III integral membrane protein of unknown function, has regions of similarity to mitochondrial electron transport proteins		Protein of unknown function (Ytp1) Domain of unknown function (DUF2427)	orf19.4756	fungal-specific
YALI0B07755g	3.01931	1.59422	0.0011252	0.00360301	UP		weakly similar to uniprot|Q7SDW1 Neurospora crassa NCU03295.1 related to 4-coumarate-CoA ligase	YBR222C	PCS60	Peroxisomal AMP-binding protein, localizes to both the peroxisomal peripheral membrane and matrix, expression is highly inducible by oleic acid, similar to E. coli long chain acyl-CoA synthetase	SIMILAR TO	Domain of unknown function (DUF4009) AMP-binding enzyme
YALI0D13640g	3.01903	1.59408	9.8071e-09	8.825e-08	UP		similar to uniprot|P38887 Saccharomyces cerevisiae YHR202w	YHR202W		Putative protein of unknown function; green fluorescent protein (GFP)-fusion protein localizes to the vacuole, while HA-tagged protein is found in the soluble fraction, suggesting cytoplasmic localization		Calcineurin-like phosphoesterase	orf19.5342	fungal-specific (no human or murine homolog)
YALI0D06193g	3.01757	1.59339	1.40394e-06	8.77877e-06	UP		weakly similar to KLLA-IPF1932.1 Kluyveromyces lactis KLLA0F00572g, start by similarity					Fungal Zn(2)-Cys(6) binuclear cluster domain Fungal specific transcription factor domain	ZCF22	Predicted zinc-finger protein of unknown function
YALI0C13530g	3.0155	1.5924	9.87452e-09	8.8731e-08	UP		similar to uniprot|P06781 Saccharomyces cerevisiae YNL090w RHO2 GTP-binding protein of the RHO subfamily of RAS-like proteins	YNL090W	RHO2	Non-essential small GTPase of the Rho/Rac subfamily of Ras-like proteins, involved in the establishment of cell polarity and in microtubule assembly		Ras family	orf19.2204.2
YALI0E15015g	3.00986	1.58969	0.00372897	0.0103904	UP		no similarity, hypothetical start
YALI0E25674g	3.0064	1.58804	2.26797e-06	1.36185e-05	UP		no similarity, possibly noncoding, hypothetical start
YALI0C05104g	3.00506	1.58739	2.25341e-08	1.94774e-07	UP		weakly similar to uniprot|Q02771 Saccharomyces cerevisiae YER058w PET117 cytochrome c oxidase assembly factor, start by similarity
YALI0E28622g	3.0034	1.5866	0.000114929	0.000479095	UP		similar to uniprot|P33413 Saccharomyces cerevisiae YHL016c DUR3 urea transport protein	YHL016C	DUR3	Plasma membrane transporter for both urea and polyamines, expression is highly sensitive to nitrogen catabolite repression and induced by allophanate, the last intermediate of the allantoin degradative pathway	SIMILAR TO	Sodium:solute symporter family	orf19.5017	Putative urea transporter; possibly an essential gene, disruptants not obtained by UAU1 method
YALI0C19382g	2.99979	1.58486	1.31985e-09	1.37911e-08	UP		highly similar to uniprot|P23638 Saccharomyces cerevisiae YGR135w PRE9 20S proteasome subunit Y13 (alpha3) P7.1.f7.1	YGR135W	PRE9	Alpha 3 subunit of the 20S proteasome, the only nonessential 20S subunit; may be replaced by the alpha 4 subunit (Pre6p) under stress conditions to create a more active proteasomal isoform		Proteasome subunit A N-terminal signature Proteasome subunit	PRE9	Alpha3 (C9) subunit of the 20S proteasome; transcription is regulated by Mig1p
YALI0F18326g	2.99798	1.58399	0.000333479	0.00121739	UP		similar to uniprot|Q6C1S5 Yarrowia lipolytica YALI0F13761g, hypothetical start
YALI0D27038g	2.99789	1.58395	0.000158406	0.000630547	UP		similar to uniprot|P38995 Saccharomyces cerevisiae YDR270w CCC2	YDR270W	CCC2	Cu(+2)-transporting P-type ATPase, required for export of copper from the cytosol into an extracytosolic compartment; has similarity to human proteins involved in Menkes and Wilsons diseases		Heavy-metal-associated domain haloacid dehalogenase-like hydrolase E1-E2 ATPase	CCC2	Copper-transporting P-type ATPase of Golgi; required for wild-type iron assimilation (indirect effect via Fet3p); induced by iron starvation, ciclopirox olamine; caspofungin repressed; not required for virulence in mouse systemic infection
YALI0F03003g	2.99667	1.58336	1.2727e-07	9.61408e-07	UP		similar to uniprot|Q7S5T3 Neurospora crassa NCU09779.1 hypothetical protein, hypothetical start					2OG-Fe(II) oxygenase superfamily
YALI0C18315g	2.99266	1.58143	5.93433e-10	6.54528e-09	UP		Amine oxidase					Copper amine oxidase, N3 domain Copper amine oxidase, N2 domain Copper amine oxidase, enzyme domain
YALI0F09031g	2.98794	1.57915	0.00188047	0.00564584	UP		similar to uniprot|Q6CI91 Yarrowia lipolytica YALI0A00550g, start by similarity
YALI0D24860g	2.9863	1.57836	3.60461e-08	2.98567e-07	UP		weakly similar to uniprot|Q01652 Penicillium chrysogenum PHOG related to acid phosphatase, hypothetical start					NDT80 / PhoG like DNA-binding family	REP1	Protein involved in negative regulation of MDR1 transcription; mutants show increased resistance to azole drugs
YALI0F31295g	2.97818	1.57443	2.20272e-07	1.59384e-06	UP		some similarities with uniprot|Q7SFY3 Neurospora crassa NCU03111.1, hypothetical start					Protein of unknown function (DUF3807)
YALI0C10923g	2.97677	1.57375	0.00030899	0.00113732	UP		weakly similar to uniprot|Q12303 Saccharomyces cerevisiae Putative aspartyl protease YLR121C precursor	YLR121C	YPS3	Aspartic protease, attached to the plasma membrane via a glycosylphosphatidylinositol (GPI) anchor	SIMILAR TO	Eukaryotic aspartyl protease
YALI0D03480g	2.97082	1.57086	5.24479e-09	5.00303e-08	UP		weakly similar to uniprot|Q872A4 Neurospora crassa CAD70830 (CAD70830) Related to phosphatidylserine decarboxylase	YGR170W	PSD2	Phosphatidylserine decarboxylase of the Golgi and vacuolar membranes, converts phosphatidylserine to phosphatidylethanolamine		Phosphatidylserine decarboxylase C2 domain	orf19.3954
YALI0C21934g	2.9642	1.56764	3.0111e-10	3.45923e-09	UP		similar to uniprot|P38197 Saccharomyces cerevisiae YBL036c	YBL036C		Putative non-specific single-domain racemase based on structural similarity; binds pyridoxal 5'-phosphate; expression of GFP-fusion protein induced in response to the DNA-damaging agent MMS		Alanine racemase, N-terminal domain	orf19.2794	Protein regulated by Gcn4p; repressed in response to amino acid starvation (3-aminotriazole treatment); alkaline upregulated; macrophage-induced protein
YALI0E06391g	2.95361	1.56248	7.39409e-07	4.83776e-06	UP		similar to uniprot|Q12226 Saccharomyces cerevisiae YLL063c AYT1	YLL063C	AYT1	Acetyltransferase; catalyzes trichothecene 3-O-acetylation, suggesting a possible role in trichothecene biosynthesis		Transferase family
YALI0E05995g	2.95177	1.56158	4.42429e-09	4.27816e-08	UP		weakly similar to uniprot|Q99156 Yarrowia lipolytica LIP1 Lipase 1 precursor, start by similarity					Carboxylesterase family
YALI0E33913g	2.95116	1.56128	3.49735e-05	0.000166059	UP		no similarity, hypoithetical start
YALI0F24915g	2.95113	1.56127	6.16022e-09	5.78933e-08	UP		weakly similar to uniprot|P36096 Saccharomyces cerevisiae YKL034w TUL1 ligase	YKL034W	TUL1	Golgi-localized RING-finger ubiquitin ligase (E3), involved in ubiquitinating and sorting membrane proteins that contain polar transmembrane domains to multivesicular bodies for delivery to the vacuole for quality control purposes		RING-H2 zinc finger	orf19.2131
YALI0B21098g	2.946	1.55876	3.91126e-09	3.81108e-08	UP		similar to uniprot|P40032 Saccharomyces cerevisiae YER049W Hypothetical 74.0 kDa protein in CAJ1-HOM3 intergenic region	YER049W	TPA1	Poly(rA)-binding protein involved in translation termination efficiency, mRNA poly(A) tail length and mRNA stability; interacts with Sup45p (eRF1), Sup35p (eRF3) and Pab1p; similar to prolyl 4-hydroxylases; binds Fe(III) and 2-oxoglutarate		Oxoglutarate and iron-dependent oxygenase degradation C-term 2OG-Fe(II) oxygenase superfamily	orf19.1802	decreased expression in response to prostaglandins
YALI0F15895g	2.94338	1.55747	4.0743e-07	2.80739e-06	UP		weakly similar to wi|NCU02221.1 Neurospora crassa NCU02221.1 predicted protein, hypothetical start					DASH complex subunit Spc34
YALI0F11363g	2.94215	1.55687	1.06937e-09	1.13608e-08	UP		weakly similar to uniprot|U19102 Saccharomyces cerevisiae YLR356w and DEHA0F10417g Debaryomyces hansenii, start by similarity
YALI0B12782g	2.93475	1.55324	3.72887e-08	3.06859e-07	UP	SIP5	Protein SIP5	YMR140W	SIP5	Protein of unknown function; interacts with both the Reg1p/Glc7p phosphatase and the Snf1p kinase			orf19.2458	Putative transcription factor with zinc finger DNA-binding motif
YALI0E30151g	2.93089	1.55134	0.00413857	0.0114067	UP		similar to uniprot|P40029 Saccharomyces cerevisiae YER042W MXR1 Peptide methionine sulfoxide reductase (Protein- methionine-S-oxide reductase)	YER042W	MXR1	Methionine-S-sulfoxide reductase, involved in the response to oxidative stress; protects iron-sulfur clusters from oxidative inactivation along with MXR2; involved in the regulation of lifespan	SIMILAR TO	Peptide methionine sulfoxide reductase
YALI0C12364g	2.92745	1.54964	0.0105662	0.0258014	UP		some similarities with uniprot|Q03125 Saccharomyces cerevisiae YDR043c NRG1 transcriptional repressor for glucose repression of STA1 gene expression	YDR043C	NRG1	Transcriptional repressor that recruits the Cyc8p-Tup1p complex to promoters; mediates glucose repression and negatively regulates a variety of processes including filamentous growth and alkaline pH response		Zinc-finger double domain	NRG1	Transcriptional repressor; regulates hyphal genes, virulence genes, chlamydospore development, and genes involved in rescue and stress responses; effects both Tup1p-dependent (major) and -independent (minor) regulation
YALI0A18183g	2.92652	1.54918	1.75919e-09	1.78818e-08	UP		similar to uniprot|P19807 Saccharomyces cerevisiae YGL077c HNM1 choline permease	YGL077C	HNM1	Choline/ethanolamine transporter; involved in the uptake of nitrogen mustard and the uptake of glycine betaine during hypersaline stress; co-regulated with phospholipid biosynthetic genes and negatively regulated by choline and myo-inositol		Amino acid permease	orf19.2072
YALI0F10197g	2.92289	1.54739	3.56964e-09	3.49429e-08	UP		similar to uniprot|Q9HGY3 Candida boidinii D-amino acid oxidase, start by similarity					FAD dependent oxidoreductase	IFG3	Putative D-amino acid oxidase
YALI0E21087g	2.91546	1.54372	1.32757e-09	1.38491e-08	UP		some similarities to uniprot|P87049 Schizosaccharomyces pombe G1/S-specific cyclin pas1, hypothetical start					Cyclin
YALI0F14509g	2.91109	1.54156	0.000159508	0.000634139	UP		some similarities with uniprot|Q05050 Saccharomyces cerevisiae YMR031c or uniprot|P35736 Saccharomyces cerevisiae YKL050c, hypothetical start					Protein of unknown function (DUF3812)
YALI0A18062g	2.90842	1.54024	2.60284e-09	2.60407e-08	UP		similar to uniprot|P54781 Saccharomyces cerevisiae YMR015c ERG5 C-22 sterol desaturase	YMR015C	ERG5	C-22 sterol desaturase, a cytochrome P450 enzyme that catalyzes the formation of the C-22(23) double bond in the sterol side chain in ergosterol biosynthesis; may be a target of azole antifungal drugs		Cytochrome P450	ERG5	Putative C-22 sterol desaturase; fungal C-22 sterol desaturases are cytochrome P450 enzymes of ergosterol biosynthesis, catalyze formation of the C-22(23) double bond in the sterol side chain; transposon mutation affects filamentous growth
YALI0F01694g	2.90825	1.54015	0.00020188	0.000781087	UP		some similarities with uniprot|P25623 Saccharomyces cerevisiae YCR030c and DEHA0D03916g Debaryomyces hansenii IPF 10442.1	YCR030C	SYP1	Protein of unknown function that may regulate assembly and disassembly of the septin ring; colocalizes and interacts with septin subunits; potential role in actin cytoskeletal organization		Muniscin C-terminal mu homology domain Fes/CIP4, and EFC/F-BAR homology domain	orf19.5671
YALI0E14839g	2.90574	1.53891	1.74436e-09	1.77595e-08	UP		weakly similar to KLLA0D09174g Kluyveromyces lactis, hypothetical start
YALI0C09232g	2.90461	1.53835	0.00211563	0.00627772	UP		some similarities with uniprot|Q12427 Saccharomyces cerevisiae YDR169c STB3 SIN3 protein-binding protein	YDR169C	STB3	Ribosomal RNA processing element (RRPE)-binding protein involved in the induction of non-ribosomal protein growth genes by glucose; binds Sin3p in a two-hybrid assay		Putative Sin3 binding protein	STB3	caspofungin induced; macrophage/pseudohyphal-repressed
YALI0E26026g	2.89809	1.5351	2.37189e-09	2.37676e-08	UP		similar to DEHA0D12386g Debaryomyces hansenii	YDL072C	YET3	Protein of unknown function; YET3 null mutant decreases the level of secreted invertase; homolog of human BAP31 protein		B-cell receptor-associated protein 31-like	orf19.1564	Plasma membrane-localized protein of unknown function
YALI0B22462g	2.89765	1.53488	4.05484e-07	2.80005e-06	UP		no similarity, hypothetical start					BTB/POZ domain
YALI0B16720g	2.89765	1.53488	3.99221e-06	2.29941e-05	UP		similar to uniprot|P47140 Saccharomyces cerevisiae YJR100c weak similarity to BUD3P singleton	YJR100C	AIM25	Putative protein of unknown function; non-tagged protein is detected in purified mitochondria in high-throughput studies; similar to murine NOR1; null mutant is viable and displays elevated frequency of mitochondrial genome loss		Scramblase	orf19.3929
YALI0B11792g	2.89498	1.53355	0.000635718	0.00217403	UP		some similarities with DEHA0E14619g Debaryomyces hansenii IPF 11767.1, hypothetical start
YALI0E17743g	2.8904	1.53127	0.00100577	0.0032567	UP		similar to uniprot|O74526 Schizosaccharomyces pombe Ser/thr protein kinase	YCR008W	SAT4	Ser/Thr protein kinase involved in salt tolerance; funtions in regulation of Trk1p-Trk2p potassium transporter; partially redundant with Hal5p; has similarity to Npr1p	SIMILAR TO	Protein kinase domain	PTK2	Putative protein kinase of polyamine import; mutation confers hypersensitivity to high concentrations of tunicamycin; upregulated in biofilm
YALI0E34199g	2.88928	1.53071	7.42458e-07	4.85256e-06	UP		weakly similar to DEHA0F17446g Debaryomyces hansenii IPF 7719.1	YJR054W		Vacuolar protein of unknown function; potential Cdc28p substrate			orf19.6563	transcription is induced in response to alpha pheromone in SpiderM medium
YALI0A16170g	2.88015	1.52614	1.61204e-08	1.41846e-07	UP		no similarity, hypothetical start
YALI0B11946g	2.87627	1.5242	2.60939e-07	1.87528e-06	UP		some similarities with uniprot|AAH43775 Xenopus laevis	YPL249C	GYP5	GTPase-activating protein (GAP) for yeast Rab family members, involved in ER to Golgi trafficking; exhibits GAP activity toward Ypt1p that is stimulated by Gyl1p, also acts on Sec4p; interacts with Gyl1p, Rvs161p and Rvs167p	SIMILAR TO	Rab-GTPase-TBC domain
YALI0C09460g	2.87418	1.52315	7.17434e-08	5.62699e-07	UP	TAH18	Probable NADPH reductase TAH18 (EC 1.-.-.-)	YPR048W	TAH18	Protein of unknown function that plays a pro-death role in response to oxidative stress; highly conserved across species and similar to human protein NDOR1; allele is synthetically lethal with the pol3-13 allele of DNA polymerase delta		Oxidoreductase NAD-binding domain Flavodoxin FAD binding domain	orf19.2040
YALI0F31427g	2.87339	1.52275	7.47305e-09	6.90062e-08	UP		similar to uniprot|Q99042 Trigonopsis variabilis D-amino acid oxidase and DEHA0B06754g Debaryomyces hansenii IPF 9691.1, start by similarity					FAD dependent oxidoreductase	DAO1	Putative D-amino acid oxidase; transcription is regulated upon yeast-hyphal switch
YALI0D07722g	2.87214	1.52213	1.42237e-07	1.06939e-06	UP		similar to uniprot|Q86Z93 Gibberella moniliformis KLP7 Kinesin	YGL216W	KIP3	Kinesin-related motor protein involved in mitotic spindle positioning	SIMILAR TO	Kinesin motor domain	orf19.3667
YALI0E12551g	2.87109	1.5216	4.13308e-07	2.83864e-06	UP		weakly similar to uniprot|P32791 Saccharomyces cerevisiae YLR214w FRE1 ferric (and cupric) reductase transmembrane component 1 [Precursor], hypothetical start					Ferric reductase like transmembrane component FAD-binding domain
YALI0C08481g	2.86531	1.51869	7.71858e-08	6.02409e-07	UP		similar to uniprot|P40986 Saccharomyces cerevisiae YDR182w CDC1 cell division control protein	YDR182W	CDC1	Putative lipid phosphatase of the endoplasmic reticulum; shows Mn2+ dependence and may affect Ca2+ signaling; mutants display actin and general growth defects and pleiotropic defects in cell cycle progression and organelle distribution		Calcineurin-like phosphoesterase	orf19.3083
YALI0D01760g	2.86447	1.51827	1.72761e-07	1.27326e-06	UP		weakly similar to uniprot|P53275 Saccharomyces cerevisiae YGR127w	YGR127W		Putative protein of unknown function; expression is regulated by Msn2p/Msn4p, indicating a possible role in stress response		NRDE protein
YALI0F30833g	2.8632	1.51763	0.000142633	0.000576035	UP		similar to uniprot|Q06702 Saccharomyces cerevisiae YLR307w CDA1 sporulation-specific chitin deacetylase	YLR307W	CDA1	Chitin deacetylase, together with Cda2p involved in the biosynthesis ascospore wall component, chitosan; required for proper rigidity of the ascospore wall		Polysaccharide deacetylase	CDA2	Putative protein of unknown function, transcription is positively regulated by Tbf1p
YALI0D04224g	2.86164	1.51684	9.43024e-08	7.2795e-07	UP		no similarity, hypothetical start					Ornithine decarboxylase antizyme
YALI0F01738g	2.85952	1.51578	0.0010663	0.00343171	UP		some similarities with DEHA0D03850g Debaryomyces hansenii IPF 10436.1	YNL054W	VAC7	Integral vacuolar membrane protein involved in vacuole inheritance and morphology; activates Fab1p kinase activity under basal conditions and also after hyperosmotic shock		Vacuolar segregation subunit 7	VAC7	Protein not essential for viability; similar to S. cerevisiae Fab1p, which is an enzyme regulator involved in phospholipid metabolism
YALI0B08096g	2.85937	1.5157	0.00124467	0.00393404	UP		weakly similar to uniprot|Q07895 Saccharomyces cerevisiae YLR001c	YLR001C		Putative protein of unknown function; the authentic, non-tagged protein is detected in highly purified mitochondria in high-throughput studies; predicted to be palmitoylated		Fasciclin domain	orf19.7096
YALI0E04158g	2.85757	1.51479	2.47537e-06	1.47801e-05	UP		similar to uniprot|Q12674 Saccharomyces cerevisiae YMR162c Potential aminophospholipid translocase	YMR162C	DNF3	Aminophospholipid translocase (flippase) that maintains membrane lipid asymmetry in post-Golgi secretory vesicles; localizes to the trans-Golgi network; likely involved in protein transport; type 4 P-type ATPase	SIMILAR TO	E1-E2 ATPase
YALI0C05533g	2.85732	1.51466	1.45063e-08	1.28893e-07	UP		similar to uniprot|Q9ZS91 Arabidopsis thaliana T4B21.5 protein (Hypothetical protein)	YCL033C	MXR2	Methionine-R-sulfoxide reductase, involved in the response to oxidative stress; protects iron-sulfur clusters from oxidative inactivation along with MXR1; involved in the regulation of lifespan		SelR domain	orf19.3292
YALI0E31797g	2.85379	1.51288	3.17168e-09	3.12884e-08	UP	ALG2	Alpha-1,3/1,6-mannosyltransferase ALG2 (EC 2.4.1.132) (EC 2.4.1.257) (Asparagine-linked glycosylation protein 2) (GDP-Man:Man(1)GlcNAc(2)-PP-Dol alpha-1,3-mannosyltransferase) (GDP-Man:Man(1)GlcNAc(2)-PP-dolichol mannosyltransferase) (GDP-Man:Man(2)GlcNAc(2)-PP-Dol alpha-1,6-mannosyltransferase)	YGL065C	ALG2	Mannosyltransferase that catalyzes two consecutive steps in the N-linked glycosylation pathway; alg2 mutants exhibit temperature-sensitive growth and abnormal accumulation of the lipid-linked oligosaccharide Man2GlcNAc2-PP-Dol		Glycosyltransferase Family 4 Glycosyl transferases group 1	ALG2	Putative mannosyltransferase involved in cell wall mannan biosynthesis; transcription is elevated in chk1, nik1, and sln1 homozygous null mutants
YALI0B12298g	2.85019	1.51106	1.76466e-06	1.08213e-05	UP		similar to CA5393|IPF9398 Candida albicans IPF9398 unknown function, hypothetical start					Calcineurin-like phosphoesterase
YALI0E13596g	2.84258	1.5072	0.000333839	0.0012175	UP		some similarities with uniprot|P48743 Saccharomyces cerevisiae YLR176c RFX1 repressor of DNA damage-inducible genes	YLR176C	RFX1	Major transcriptional repressor of DNA-damage-regulated genes, recruits repressors Tup1p and Cyc8p to their promoters; involved in DNA damage and replication checkpoint pathway; similar to a family of mammalian DNA binding RFX1-4 proteins		RFX DNA-binding domain
YALI0A19074g	2.84007	1.50593	0.000183144	0.00071513	UP		similar to uniprot|O93808 Saccharomyces cerevisiae YPR184W Oligo-1 4-1 4-glucantransferase / amylo-1 6- glucosidase	YPR184W	GDB1	Glycogen debranching enzyme containing glucanotranferase and alpha-1,6-amyloglucosidase activities, required for glycogen degradation; phosphorylated in mitochondria		Amylo-alpha-1,6-glucosidase Alpha amylase, catalytic domain	GDB1	Putative glycogen debranching enzyme; expression is regulated upon white-opaque switching; regulated by Nrg1p, Tup1p
YALI0D15554g	2.83657	1.50415	5.13034e-08	4.09461e-07	UP		some similarities with uniprot|P87132 Schizosaccharomyces pombe Hypothetical protein, hypothetical start					Universal stress protein family	orf19.3136
YALI0B15304g	2.8313	1.50146	4.20399e-09	4.07134e-08	UP		Amidophosphoribosyltransferase (ATase) (EC 2.4.2.14) (Glutamine phosphoribosylpyrophosphate amidotransferase)	YMR300C	ADE4	Phosphoribosylpyrophosphate amidotransferase (PRPPAT; amidophosphoribosyltransferase), catalyzes first step of the 'de novo' purine nucleotide biosynthetic pathway		Phosphoribosyl transferase domain Glutamine amidotransferases class-II	ADE4	flucytosine induced
YALI0F08349g	2.83126	1.50145	4.18518e-06	2.39751e-05	UP	ATG9	Autophagy-related protein 9	YDL149W	ATG9	Transmembrane protein involved in forming Cvt and autophagic vesicles; cycles between the phagophore assembly site (PAS) and other cytosolic punctate structures, not found in autophagosomes; may be involved in membrane delivery to the PAS		Autophagy protein Apg9	ATG9	Protein similar to S. cerevisiae Atg9p, required for an early step in autophagy; required for cytoplasm to vacuole trafficking of Lap41p
YALI0E27093g	2.83116	1.50139	9.81571e-08	7.54954e-07	UP		no similarity, hypothetical start					Histidine phosphatase superfamily (branch 2)
YALI0E15510g	2.83007	1.50084	1.0947e-08	9.79528e-08	UP		weakly similar to uniprot|Q04116 Saccharomyces cerevisiae YDR451c Homeodomain protein, hypothetical start					Homeobox domain
YALI0B18150g	2.82433	1.49791	5.79229e-07	3.85728e-06	UP		similar to uniprot|P53224 Saccharomyces cerevisiae YGR038W ORM1 protein	YGR038W	ORM1	Evolutionarily conserved protein with similarity to Orm2p, required for resistance to agents that induce the unfolded protein response; human ortholog is located in the endoplasmic reticulum		ORMDL family	ORM1	mutation confers hypersensitivity to aureobasidin A
YALI0F06259g	2.82028	1.49584	1.53472e-08	1.35606e-07	UP		weakly similar to uniprot|P39103 Saccharomyces cerevisiae YML129C COX14 Mitochondrial membrane protein, involved in translational regulation of Cox1p and assembly of cytochrome c oxidase (complex IV), hypothetical start
YALI0C02629g	2.81814	1.49474	0.0133092	0.0315262	UP		weakly similar to uniprot|Q86KG7 Dictyostelium discoideum R2005 protein	YBL054W	TOD6	PAC motif binding protein involved in rRNA and ribosome biogenesis; subunit of the RPD3L histone deacetylase complex; Myb-like HTH transcription factor, similar to Dot6p; hypophosphorylated by rapamycin treatment in a Sch9p-dependent manne		Myb-like DNA-binding domain
YALI0D24431g	2.81207	1.49163	5.67397e-10	6.27991e-09	UP		similar to uniprot|Q8X096 Neurospora crassa Probable ATP citrate lyase subunit 2, hypothetical start					ATP-grasp domain
YALI0C13794g	2.81141	1.49129	4.95124e-08	3.97162e-07	UP		weakly similar to uniprot|Q6C189 Yarrowia lipolytica YALI0F18326g, hypothetical start
YALI0A20658g	2.81021	1.49068	7.88157e-08	6.14375e-07	UP		no similarity, hypothetical start
YALI0D26730g	2.80989	1.49051	1.15044e-06	7.33807e-06	UP		similar to uniprot|Q05497 Saccharomyces cerevisiae YDR338c	YDR338C		Putative protein of unknown function		MatE
YALI0D22616g	2.80943	1.49028	4.04596e-06	2.32405e-05	UP		weakly similar to uniprot|P38866 Saccharomyces cerevisiae YHR176w FMO flavin-containing monooxygenase	YHR176W	FMO1	Flavin-containing monooxygenase, localized to the cytoplasmic face of the ER membrane; catalyzes oxidation of biological thiols to maintain the ER redox buffer ratio for correct folding of disulfide-bonded proteins		Flavin-binding monooxygenase-like	orf19.3307
YALI0F06776g	2.80724	1.48915	2.33252e-06	1.39665e-05	UP		weakly similar to uniprot|P39932 Saccharomyces cerevisiae YDR536w STL1 member of the sugar permease family	YDR536W	STL1	Glycerol proton symporter of the plasma membrane, subject to glucose-induced inactivation, strongly but transiently induced when cells are subjected to osmotic shock	SIMILAR TO	Sugar (and other) transporter
YALI0B03564g	2.80714	1.4891	8.35235e-09	7.61298e-08	UP		similar to uniprot|P43070 Candida albicans Glucan 1 3- beta -glucosidase precursor (EC 3.2.1.58) (Exo-1 3-beta- glucanase)	YGR282C	BGL2	Endo-beta-1,3-glucanase, major protein of the cell wall, involved in cell wall maintenance		Glycosyl hydrolases family 17	BGL2	1,3-beta-Glucosyltransferase, cell wall enzyme; one of multiple 1,3-beta-glucosyltransferases; mutant has cell-wall and growth defects, but wild-type 1,3- or 1,6-beta-glucan content; antigenic; virulence role in mouse systemic infection
YALI0F19778g	2.80339	1.48717	1.82721e-08	1.59673e-07	UP		some similarities to uniprot|P39743 Saccharomyces cerevisiae YDR388w RVS167 reduced viability upon starvation protein, hypothetical start					SH3 domain BAR domain
YALI0B23188g	2.80183	1.48637	1.11688e-07	8.49764e-07	UP		highly similar to uniprot|Q9P4V1 Candida boidinii Phosphoribosyl-5-aminoimidazole carboxylase	YOR128C	ADE2	Phosphoribosylaminoimidazole carboxylase, catalyzes a step in the 'de novo' purine nucleotide biosynthetic pathway; red pigment accumulates in mutant cells deprived of adenine		ATP-grasp domain AIR carboxylase	ADE2	Phosphoribosylaminoimadazole carboxylase; enzyme of adenine biosynthesis; required for wild-type growth and virulence in immunosuppressed mouse systemic infection; not induced during GCN response, in contrast to S. cerevisiae ortholog
YALI0E12111g	2.79782	1.4843	3.11337e-08	2.60596e-07	UP		no similarity, hypothetical start
YALI0D24233g	2.79403	1.48235	0.0027513	0.00791263	UP		weakly similar to uniprot|Q9P668 Neurospora crassa Conserved hypothetical protein	YNL321W	VNX1	Low affinity vacuolar membrane localized monovalent cation/H+ antiporter; member of the calcium exchanger (CAX) family; potential Cdc28p substrate		Sodium/calcium exchanger protein Domain of unknown function (DUF307)
YALI0D07568g	2.79288	1.48175	1.97457e-08	1.71842e-07	UP		weakly similar to uniprot|P40502 Saccharomyces cerevisiae YIL087c, hypothetical start					Protein of unknown function (DUF2416)
YALI0E17325g	2.78759	1.47902	6.4753e-09	6.04965e-08	UP	SDS23	Protein SDS23	YBR214W	SDS24	One of two S. cerevisiae homologs (Sds23p and Sds24p) of the S. pombe Sds23 protein, which is implicated in APC/cyclosome regulation; involved in cell separation during budding; may play an indirect role in fluid-phase endocytosis		CBS domain	SDS24	Protein described as similar to S. cerevisiae Ybr214wp; transcription regulated by Mig1p and Tup1p; fluconazole-induced
YALI0D08360g	2.78502	1.47769	0.00384714	0.0106729	UP		weakly similar to uniprot|O13938 Schizosaccharomyces pombe Hypothetical protein, start by similarity						orf19.4607	hyphal induced
YALI0E01408g	2.7841	1.47721	3.70696e-08	3.05529e-07	UP		weakly similar to uniprot|Q9HEL5 Neurospora crassa 12F11.110 putative Phosphoinositide phosphatase	YNL106C	INP52	Polyphosphatidylinositol phosphatase, dephosphorylates a number of phosphatidylinositols (PIs) to PI; involved in endocytosis; hyperosmotic stress causes translocation to actin patches; synaptojanin-like protein with a Sac1 domain	SIMILAR TO	SacI homology domain Inositol phosphatase
YALI0E28534g	2.7839	1.47711	4.19719e-08	3.44061e-07	UP		weakly similar to uniprot|P33890 Saccharomyces cerevisiae YOR010c TIR2 cold shock induced protein P5.25.f5.1, hypothetical start
YALI0F05346g	2.78088	1.47554	3.65484e-08	3.0194e-07	UP		weakly similar to uniprot|Q00858 Fusarium solani Cutinase gene palindrome-binding protein, hypothetical start					PAS domain GATA zinc finger
YALI0D02233g	2.77994	1.47505	1.35715e-07	1.02277e-06	UP		weakly similar to DEHA0A09471g Debaryomyces hansenii IPF 7017.1	YNL094W	APP1	Protein of unknown function, interacts with Rvs161p and Rvs167p; computational analysis of protein-protein interactions in large-scale studies suggests a possible role in actin filament organization		Uncharacterized conserved protein (DUF2183)	orf19.1698
YALI0D13024g	2.77788	1.47398	1.59361e-08	1.40419e-07	UP		similar to uniprot|Q96WJ7 Blumeria graminis Glutamine synthetase (EC 6.3.1.2) (Glutamate--ammonia ligase), hypothetical start					Glutamine synthetase, catalytic domain
YALI0E05687g	2.77558	1.47279	4.8596e-08	3.9179e-07	UP		no similarity, hypothetical start
YALI0F13937g	2.77391	1.47192	0.00372787	0.0103904	UP		highly similar to uniprot|O93968 Candida boidinii Formate dehydrogenase or uniprot|O13437 Candida boidinii NAD- dependent formate dehydrogenase	YOR388C	FDH1	NAD(+)-dependent formate dehydrogenase, may protect cells from exogenous formate	SIMILAR TO	D-isomer specific 2-hydroxyacid dehydrogenase, NAD binding domain D-isomer specific 2-hydroxyacid dehydrogenase, catalytic domain
YALI0F08019g	2.77222	1.47104	9.06093e-07	5.86193e-06	UP		weakly similar to uniprot|Q12015 Saccharomyces cerevisiae YOR223w	YOR223W		Putative protein of unknown function		DUF2407 ubiquitin-like domain DUF2407 C-terminal domain
YALI0C20119g	2.77073	1.47026	0.00028208	0.00105229	UP	ATG7	Ubiquitin-like modifier-activating enzyme ATG7 (ATG12-activating enzyme E1 ATG7) (Autophagy-related protein 7)	YHR171W	ATG7	Autophagy-related protein and dual specificity member of the E1 family of ubiquitin-activating enzymes; mediates the conjugation of Atg12p with Atg5p and Atg8p with phosphatidylethanolamine, required steps in autophagosome formation		ThiF family
YALI0D07260g	2.76956	1.46966	1.97017e-05	9.88663e-05	UP		no similarity, hypothetical start
YALI0F14619g	2.76851	1.46911	0.0032315	0.00914463	UP		no similarity, hypothetical start
YALI0F18128g	2.76838	1.46904	2.74337e-08	2.31752e-07	UP		no similarity, hypothetical start
YALI0A11198g	2.76436	1.46694	0.00181389	0.00547181	UP		no similarity, hypothetical start
YALI0D22825g	2.75844	1.46385	5.5372e-06	3.10758e-05	UP		no similarity, hypothetical start
YALI0B13618g	2.75571	1.46242	1.3965e-06	8.74085e-06	UP		similar to uniprot|P39719 Saccharomyces cerevisiae YAL053w FLC2 and similar to uniprot|Q08967 Saccharomyces cerevisiae YPL221W FLC1 Flavin carrier	YGL139W	FLC3	Putative FAD transporter, similar to Flc1p and Flc2p; localized to the ER		Transient receptor potential (TRP) ion channel
YALI0B02398g	2.75532	1.46222	0.0113923	0.0275289	UP		similar to uniprot|Q06593 Saccharomyces cerevisiae YPR194c OPT2	YPR194C	OPT2	Oligopeptide transporter; member of the OPT family, with potential orthologs in S. pombe and C. albicans; also plays a role in formation of mature vacuoles	SIMILAR TO	OPT oligopeptide transporter protein
YALI0E26345g	2.75517	1.46214	6.64691e-08	5.22621e-07	UP		similar to DEHA0D10692g Debaryomyces hansenii	YHR032W		Putative protein of unknown function; putative substrate of the cAMP-dependent protein kinase (PKA)	SIMILAR TO	MatE	orf19.6023
YALI0A08041g	2.7533	1.46116	4.58248e-05	0.00021096	UP		weakly similar to uniprot|P06776 Saccharomyces cerevisiae YOR360c PDE2 high affinity 3' 5'-cyclic- nucleotide phosphodiesterase	YOR360C	PDE2	High-affinity cyclic AMP phosphodiesterase, component of the cAMP-dependent protein kinase signaling system, protects the cell from extracellular cAMP, contains readthrough motif surrounding termination codon		3'5'-cyclic nucleotide phosphodiesterase	PDE2	Cyclic nucleotide phosphodiesterase, high affinity; role in moderating signaling via cAMP; required for wild-type virulence, hyphal growth, switching, and cell wall, but not for pseudohyphal growth; expressed shortly after hyphal induction
YALI0D00627g	2.75329	1.46116	3.0408e-05	0.000146239	UP		weakly similar to uniprot|P32334 Saccharomyces cerevisiae YGR014w MSB2 multicopy suppressor of a CDC24 bud emergence defect	YGR014W	MSB2	Mucin family member involved in the Cdc42p- and MAP kinase-dependent filamentous growth signaling pathway; also functions as an osmosensor in parallel to the Sho1p-mediated pathway; potential Cdc28p substrate			MSB2	Mucin family member, possible sensor of cell wall damage; required for Cek1p phosphorylation in response to cell wall stress; transcription is negatively regulated by Rim101p
YALI0A14740g	2.74791	1.45833	1.50266e-05	7.74868e-05	UP		weakly similar to uniprot|Q03984 Saccharomyces cerevisiae YDR179wa hypothetical protein, hypothetical start					PXA domain
YALI0F23309g	2.74691	1.45781	0.00143243	0.00445945	UP	CWC21	Pre-mRNA-splicing factor CWC21					cwf21 domain	orf19.4875
YALI0F31229g	2.74601	1.45734	7.82429e-06	4.26675e-05	UP		no similarity, hypothetical start					Inheritance of peroxisomes protein 1
YALI0A00154g	2.74495	1.45678	0.0107872	0.0262773	UP		similar to uniprot|Q6BZL9 Debaryomyces hansenii DEHA2A00374g, start by similarity					Ser-Thr-rich glycosyl-phosphatidyl-inositol-anchored membrane family
YALI0F16940g	2.74366	1.4561	6.24934e-08	4.93194e-07	UP		some similarities with uniprot|P35845 Saccharomyces cerevisiae YAR042W SWH1 Protein similar to mammalian oxysterol-binding protein	YDL019C	OSH2	Member of an oxysterol-binding protein family with seven members in S. cerevisiae; family members have overlapping, redundant functions in sterol metabolism and collectively perform a function essential for viability		PH domain Oxysterol-binding protein Ankyrin repeats (3 copies)	orf19.5095	caspofungin induced; possibly an essential gene, disruptants not obtained by UAU1 method
YALI0D25894g	2.74162	1.45503	6.29956e-08	4.9654e-07	UP		similar to uniprot|P27882 Saccharomyces cerevisiae YGR029W ERV1 protein mitochondrial precursor (14 kDa regulatory protein)	YGR029W	ERV1	Flavin-linked sulfhydryl oxidase of the mitochondrial intermembrane space (IMS), oxidizes Mia40p as part of a disulfide relay system that promotes IMS retention of imported proteins; ortholog of human hepatopoietin (ALR)		Erv1 / Alr family
YALI0C16456g	2.73449	1.45127	0.000356194	0.00129014	UP	RCF1	Respiratory supercomplex factor 1, mitochondrial	YML030W	AIM31	Putative protein of unknown function; GFP-fusion protein localizes to mitochondria; may interact with respiratory chain complexes III or IV; null mutant is viable and displays reduced frequency of mitochondrial genome loss		Hypoxia induced protein conserved region	orf19.1114	Membrane-localized protein of unknown function
YALI0E22264g	2.72456	1.44603	6.06017e-08	4.80053e-07	UP		weakly similar to wi|NCU07888.1 Neurospora crassa NCU07888.1 predicted protein, hypothetical start					Domain of unknown function (DUF4112)	orf19.3007.2
YALI0E18436g	2.72136	1.44433	4.41664e-07	3.00416e-06	UP		weakly similar to uniprot|P53983 Saccharomyces cerevisiae YNL008c ubiquitin-protein ligase activity, hypothetical start					Zinc finger, C3HC4 type (RING finger)
YALI0D22913g	2.72102	1.44415	0.00262082	0.00758546	UP		weakly similar to uniprot|Q8TFD3 Mycosphaerella pini Putative dothistromin transporter	YKR105C	VBA5	Putative transporter of the Major Facilitator Superfamily (MFS); proposed role as a basic amino acid permease based on phylogeny	SIMILAR TO	Major Facilitator Superfamily	orf19.3444	Predicted membrane transporter, member of the drug:proton antiporter (14 spanner) (DHA2) family, major facilitator superfamily (MFS)
YALI0C06754g	2.71766	1.44237	4.75335e-07	3.20914e-06	UP		weakly similar to uniprot|Q96U38 Neurospora crassa Conserved hypothetical protein, start by similarity					Catalytic LigB subunit of aromatic ring-opening dioxygenase
YALI0C14344g	2.71737	1.44221	0.000715379	0.00242519	UP		highly similar to uniprot|O93968 Candida boidinii Formate dehydrogenase (EC 1.2.1.2)	YOR388C	FDH1	NAD(+)-dependent formate dehydrogenase, may protect cells from exogenous formate	SIMILAR TO	D-isomer specific 2-hydroxyacid dehydrogenase, NAD binding domain D-isomer specific 2-hydroxyacid dehydrogenase, catalytic domain
YALI0E04169g	2.70716	1.43678	0.000160106	0.000636117	UP		highly similar to uniprot|Q12674 Saccharomyces cerevisiae YMR162c DNF3 Potential aminophospholipid translocase	YMR162C	DNF3	Aminophospholipid translocase (flippase) that maintains membrane lipid asymmetry in post-Golgi secretory vesicles; localizes to the trans-Golgi network; likely involved in protein transport; type 4 P-type ATPase		Putative hydrolase of sodium-potassium ATPase alpha subunit haloacid dehalogenase-like hydrolase	orf19.2680
YALI0F13717g	2.70711	1.43675	3.62713e-06	2.10825e-05	UP		similar to uniprot|P24276 Saccharomyces cerevisiae YDR293c SSD1 involved in the tolerance to high concentration of Ca2	YDR293C	SSD1	Protein with a role in maintenance of cellular integrity, interacts with components of the TOR pathway; ssd1 mutant of a clinical S. cerevisiae strain displays elevated virulence		RNB domain	SSD1	Protein with role in resistance to host antimicrobial peptides; virulence role in murine infection; functional homolog of S. cerevisiae Ssd1p, which suppresses various mutant phenotypes; constitutively expressed and not cell-cycle regulated
YALI0C06600g	2.70369	1.43493	2.09875e-07	1.52207e-06	UP		weakly similar to uniprot|P38162 Saccharomyces cerevisiae YBL107c hypothetical protein, hypothetical start					Caffeine-induced death protein 2
YALI0E29205g	2.70342	1.43479	1.01539e-07	7.79077e-07	UP		weakly similar to uniprot|P43599 Saccharomyces cerevisiae YFR018c	YFR018C		Putative protein of unknown function		Peptidase family M28
YALI0F27687g	2.69668	1.43118	1.87387e-06	1.14579e-05	UP		no similarity, hypothetical start
YALI0B19250g	2.69293	1.42918	5.96398e-09	5.63827e-08	UP		weakly similar to uniprot|P38731 Saccharomyces cerevisiae YHL040c ARN1 ferrichrome-type siderophore transporter	YHL040C	ARN1	Transporter, member of the ARN family of transporters that specifically recognize siderophore-iron chelates; responsible for uptake of iron bound to ferrirubin, ferrirhodin, and related siderophores	SIMILAR TO	Major Facilitator Superfamily	SIT1	Transporter of ferrichrome siderophores, but not ferrioxamine B; required for wild-type invasion of human epithelial cells in vitro, but not for wild-type systemic virulence in mouse; transcription regulated by iron, Sfu1p, Rfg1p, Tup1p
YALI0C24145g	2.69038	1.42781	2.06193e-07	1.50223e-06	UP		some similarities with uniprot|Q9HGM4 Schizosaccharomyces pombe Hypothetical 28.8 kDa protein, hypothetical start					Inositol phospholipid synthesis and fat-storage-inducing TM	orf19.5291
YALI0E01804g	2.68617	1.42555	1.41671e-05	7.33527e-05	UP	PFA5	Palmitoyltransferase PFA5 (EC 2.3.1.-) (Protein fatty acyltransferase 5)	YDR459C	PFA5	Palmitoyltransferase with autoacylation activity; likely functions in pathway(s) outside Ras; member of a family of putative palmitoyltransferases containing an Asp-His-His-Cys-cysteine rich (DHHC-CRD) domain		DHHC palmitoyltransferase
YALI0A14630g	2.68345	1.42409	2.12259e-06	1.28549e-05	UP		weakly similar to wi|NCU07387.1 Neurospora crassa NCU07387.1 hypothetical protein, hypothetical start					Ring finger domain
YALI0A00440g	2.68273	1.4237	0.00129316	0.00407714	UP		similar to CAGL0C02739g Candida glabrata IPF 1020.1, start by similarity					FUN14 family	orf19.4763	Protein not essential for viability
YALI0B13310g	2.68023	1.42235	7.26105e-07	4.75713e-06	UP		similar to uniprot|Q871Q3 Neurospora crassa B11C21. 010 Related to ECM14 protein	YHR132C	ECM14	Putative metalloprotease with similarity to the zinc carboxypeptidase family, required for normal cell wall assembly		Zinc carboxypeptidase	ECM14
YALI0C18491g	2.67902	1.42171	0.000747543	0.00252211	UP		similar to uniprot|Q06593 Saccharomyces cerevisiae YPR194C	YPR194C	OPT2	Oligopeptide transporter; member of the OPT family, with potential orthologs in S. pombe and C. albicans; also plays a role in formation of mature vacuoles		OPT oligopeptide transporter protein
YALI0C22572g	2.67877	1.42157	3.204e-06	1.87604e-05	UP		similar to DEHA0D09933g Debaryomyces hansenii IPF 1370.1, hypothetical start					PQ loop repeat	orf19.6048
YALI0A18161g	2.67324	1.41859	0.000306069	0.00112853	UP		weakly similar to uniprot|O74919 Schizosaccharomyces pombe Rna binding protein-putative pre mRNA splicing factor and to to uniprot|P38151 Saccharomyces cerevisiae YBR233w PAB1-binding protein 2	YBL032W	HEK2	RNA binding protein involved in the asymmetric localization of ASH1 mRNA; represses translation of ASH1 mRNA, an effect reversed by Yck1p-dependent phosphoryation; regulates telomere position effect and length; similarity to hnRNP-K		KH domain	PBP2	Transcription is regulated by Nrg1p, Mig1p, and Tup1p
YALI0A16060g	2.67254	1.41821	1.62212e-07	1.20249e-06	UP	MCH1	Probable transporter MCH1	YDL054C	MCH1	Protein with similarity to mammalian monocarboxylate permeases, which are involved in transport of monocarboxylic acids across the plasma membrane; mutant is not deficient in monocarboxylate transport		Major Facilitator Superfamily	orf19.6180	Protein similar to Pichia anomala YDL054c and S. cerevisiae Ydl054cp; transmembrane regions predicted
YALI0D18062g	2.66281	1.41295	1.14575e-05	6.04564e-05	UP		some similarities with uniprot|P40325 Saccharomyces cerevisiae YGR268C Hypothetical 22.4 kDa protein in FOL2- YTA7 intergenic region	YGR268C	HUA1	Cytoplasmic protein containing a zinc finger domain with sequence similarity to that of Type I J-proteins; computational analysis of large-scale protein-protein interaction data suggests a possible role in actin patch assembly			orf19.3973
YALI0F05456g	2.65878	1.41077	8.81512e-08	6.82125e-07	UP	SNX3	Sorting nexin-3	YOR357C	SNX3	Sorting nexin required to maintain late-Golgi resident enzymes in their proper location by recycling molecules from the prevacuolar compartment; contains a PX domain and sequence similarity to human Snx3p		PX domain	orf19.5114
YALI0F12353g	2.65763	1.41014	8.59394e-07	5.57685e-06	UP		ATP-dependent Clp protease proteolytic subunit					Clp protease
YALI0C08140g	2.65522	1.40883	1.57134e-05	8.06359e-05	UP		no similarity, hypothetical start
YALI0A14861g	2.65421	1.40828	0.00170563	0.00520955	UP		weakly similar to CA4834|IPF1217 Candida albicans unknown function, hypothetical start					Protein of unknown function (DUF2422) Protein of unknown function (DUF2421)	orf19.2064	Putative transcription factor with zinc finger DNA-binding motif
YALI0D09757g	2.6504	1.40621	7.29136e-08	5.70468e-07	UP		weakly similar to uniprot|P38749 Saccharomyces cerevisiae YHL009c YAP3 transcription factor of a fungal- specific family of bzip proteins singleton	YHL009C	YAP3	Basic leucine zipper (bZIP) transcription factor		bZIP transcription factor	FCR3	Transcriptional regulator of the bZip family; partially functionally complements the fluconazole sensitivity of an S. cerevisiae pdr1 pdr3 double mutant; probable ortholog of S. cerevisiae Yap3p
YALI0F27313g	2.64641	1.40404	1.32874e-08	1.18727e-07	UP		weakly similar to uniprot|O13850 Schizosaccharomyces pombe hypothetical protein	YLR201C	COQ9	Protein required for ubiquinone (coenzyme Q) biosynthesis and respiratory growth; localizes to the matrix face of the mitochondrial inner membrane in a large complex with ubiquinone biosynthetic enzymes		COQ9
YALI0F10175g	2.64329	1.40234	4.62659e-07	3.1369e-06	UP		no similarity, hypothetical start
YALI0D11616g	2.63963	1.40033	6.50421e-06	3.60884e-05	UP		similar to uniprot|P53111 Saccharomyces cerevisiae YGL157w	YDR541C		Putative dihydrokaempferol 4-reductase	SIMILAR TO	NAD dependent epimerase/dehydratase family
YALI0C00275g	2.63888	1.39993	0.000134389	0.00054659	UP		no similarity, hypothetical start					F-box domain
YALI0D26532g	2.63255	1.39646	5.52012e-06	3.10074e-05	UP		some similarities with DEHA0G13519g Debaryomyces hansenii IPF14493	YMR126C	DLT1	Protein of unknown function, mutant sensitive to 6-azauracil (6AU) and mycophenolic acid (MPA)
YALI0D15862g	2.63114	1.39569	0.00321105	0.00909081	UP		weakly similar to uniprot|P40317 Saccharomyces cerevisiae YDR006c SOK1 high copy suppressor of a cyclic AMP-dependent protein kinase	YDR006C	SOK1	Protein whose overexpression suppresses the growth defect of mutants lacking protein kinase A activity; involved in cAMP-mediated signaling; localized to the nucleus; similar to the mouse testis-specific protein PBS13		T-complex protein 11
YALI0D16775g	2.63036	1.39526	0.000322804	0.00118132	UP		similar to uniprot|P38884 Saccharomyces cerevisiae YHR198c	YHR198C	AIM18	Putative protein of unknown function; the authentic, non-tagged protein is detected in highly purified mitochondria in high-throughput studies; null mutant displays elevated frequency of mitochondrial genome loss		Chalcone-flavanone isomerase	orf19.6189
YALI0F17468g	2.62929	1.39467	0.00586341	0.0154707	UP		no similarity, hypothetical start					Fungal Zn(2)-Cys(6) binuclear cluster domain
YALI0C07975g	2.62682	1.39332	0.000337793	0.00122856	UP		some similarities with uniprot|Q7RXW6 Neurospora crassa NCU01465.1 hypothetical protein	YPR095C	SYT1	Guanine nucleotide exchange factor (GEF) for Arf proteins; involved in vesicular transport; suppressor of ypt3 mutations; member of the Sec7-domain family		Sec7 domain
YALI0D19580g	2.61458	1.38658	1.33716e-06	8.42757e-06	UP		weakly similar to uniprot|P32901 Saccharomyces cerevisiae YKR093W Peptide transporter PTR2 (Peptide permease PTR2)	YKR093W	PTR2	Integral membrane peptide transporter, mediates transport of di- and tri-peptides; conserved protein that contains 12 transmembrane domains; PTR2 expression is regulated by the N-end rule pathway via repression by Cup9p	SIMILAR TO	POT family
YALI0E16368g	2.61294	1.38567	1.71305e-05	8.69252e-05	UP		similar to uniprot|P39692 Saccharomyces cerevisiae YFR030w MET10 sulfite reductase flavin-binding subunit	YFR030W	MET10	Subunit alpha of assimilatory sulfite reductase, which converts sulfite into sulfide		Oxidoreductase NAD-binding domain FAD binding domain	MET10	Predicted enzyme of sulfur amino acid metabolism; biofilm-induced expression; upregulated in the presence of human whole blood or polymorphonuclear (PMN) cells; Hog1p-induced; possibly adherence-induced
YALI0E15246g	2.61261	1.38549	4.91706e-07	3.30912e-06	UP		weakly similar to uniprot|O94060 Candida albicans Hypothetical transmembrane protein, hypothetical start					WW domain
YALI0D04873g	2.61241	1.38538	0.00153742	0.00475061	UP		similar to uniprot|P38929 Saccharomyces cerevisiae YGL006w PMC1 Ca2+-transporting P-type ATPase	YGL006W	PMC1	Vacuolar Ca2+ ATPase involved in depleting cytosol of Ca2+ ions; prevents growth inhibition by activation of calcineurin in the presence of elevated concentrations of calcium; similar to mammalian PMCA1a		haloacid dehalogenase-like hydrolase E1-E2 ATPase Cation transporting ATPase, C-terminus Cation transporter/ATPase, N-terminus	PMC1	Vacuolar calcium P-type ATPase; transcription is regulated by calcineurin and fluconazole; mutant shows increased resistance to fluconazole or lithium, and increased sensitivity to calcium
YALI0F24343g	2.61034	1.38424	1.39557e-06	8.74085e-06	UP		no similarity, hypothetical start					Telomere stability and silencing
YALI0E03872g	2.60905	1.38353	4.63285e-07	3.13779e-06	UP		weakly similar to uniprot|P47159 Saccharomyces cerevisiae YJR124c weak similarity to Staphylococcus multidrug resistance protein singleton	YJR124C		Putative protein of unknown function; expression induced under calcium shortage	SIMILAR TO	Major Facilitator Superfamily	orf19.4780	Predicted membrane transporter, member of the drug:proton antiporter (12 spanner) (DHA1) family, major facilitator superfamily (MFS)
YALI0D08316g	2.60439	1.38095	4.71385e-07	3.18618e-06	UP		weakly similar to uniprot|Q8FDQ2 Escherichia coli Hypothetical protein yrbH, hypothetical start					SIS domain	orf19.1797	induced upon biofilm formation; has GutQ domain, which is associated with phosphosugar binding
YALI0D24992g	2.60389	1.38067	2.61395e-07	1.87644e-06	UP		weakly similar to uniprot|P38958 Saccharomyces cerevisiae YDR079w PET100 cytochrome-c oxidase assembly protein singleton no start	YDR079W	PET100	Chaperone that specifically facilitates the assembly of cytochrome c oxidase, integral to the mitochondrial inner membrane; interacts with a subcomplex of subunits VII, VIIa, and VIII (Cox7p, Cox9p, and Cox8p) but not with the holoenzyme			PET100	Chaperone that facilitates the assembly of cytochrome c oxidase; plasma membrane protein
YALI0C14014g	2.60233	1.37981	2.42191e-07	1.75044e-06	UP		weakly similar to uniprot|Q06508 Saccharomyces cerevisiae YPR139c, start by similarity					Acyltransferase	orf19.1043
YALI0F06226g	2.60102	1.37908	9.7071e-08	7.48412e-07	UP		weakly similar to CA0416|IPF17492 Candida albicans IPF17492 unknown function, start by similarity					Peroxisomal biogenesis protein family
YALI0B18964g	2.59585	1.3762	0.00211926	0.00628556	UP		no similarity, hypothetical start
YALI0B09647g	2.59584	1.3762	5.68646e-08	4.51576e-07	UP		similar to uniprot|P07275 Saccharomyces cerevisiae YHR037W Delta-1-pyrroline-5-carboxylate dehydrogenase mitochondrial precursor (EC 1.5.1.12) (P5C dehydrogenase)	YHR037W	PUT2	Delta-1-pyrroline-5-carboxylate dehydrogenase, nuclear-encoded mitochondrial protein involved in utilization of proline as sole nitrogen source; deficiency of the human homolog causes HPII, an autosomal recessive inborn error of metabolism		Aldehyde dehydrogenase family	PUT2	Putative delta-1-pyrroline-5-carboxylate dehydrogenase; alkaline upregulated; protein detected by mass spec in exponential and stationary phase cultures
YALI0E22737g	2.59364	1.37498	5.76381e-05	0.000258964	UP	ATG16	Autophagy protein 16					Autophagy protein 16 (ATG16)
YALI0E02178g	2.59329	1.37478	1.80282e-07	1.32255e-06	UP		YlTra1 ENA|AJ745091 Fotyl transposase, some similarities with uniprot|Q01165 Magnaporthe grisea Transposase, hypothetical start					DDE superfamily endonuclease	orf19.3820	clade-associated gene expression
YALI0B01804g	2.58829	1.372	0.000260704	0.000982938	UP		weakly similar to uniprot|P47153 Saccharomyces cerevisiae YJR116W Hypothetical 32.0 kDa protein in NNF1- STE24 intergenic region	YJR116W		Putative protein of unknown function		TLC domain	orf19.3051	shows colony morphology-related gene regulation by Ssn6p
YALI0D07282g	2.58728	1.37144	0.00020125	0.000779599	UP		similar to uniprot|Q9P861 Arxula adeninivorans Ferro-O2- oxidoreductase precursor	YMR058W	FET3	Ferro-O2-oxidoreductase required for high-affinity iron uptake and involved in mediating resistance to copper ion toxicity, belongs to class of integral membrane multicopper oxidases		Multicopper oxidase	FET99	Protein of multicopper oxidase family; similar to S. cerevisiae Fet3p; does not functionally complement S. cerevisiae fet3 mutant growth under low-iron conditions; iron-repressed transcription; regulated by Tup1p, Rim101p
YALI0C06215g	2.58018	1.36747	1.59333e-06	9.84675e-06	UP	DRE2	Fe-S cluster assembly protein DRE2 (Anamorsin homolog)	YKR071C	DRE2	Protein that may prevent apoptosis by forming a complex with Tah18p in the absence of stress; required for iron-sulfur cluster assembly and sister chromatid cohesion; homolog of human anti-apoptotic protein Ciapin1		Cytokine-induced anti-apoptosis inhibitor 1, Fe-S biogenesis
YALI0C19151g	2.57623	1.36526	0.00630544	0.0165394	UP		weakly similar to uniprot|P39113 Saccharomyces cerevisiae YMR280c CAT8 transcription factor involved in gluconeogenesis P2.187.f2.1	YMR280C	CAT8	Zinc cluster transcriptional activator necessary for derepression of a variety of genes under non-fermentative growth conditions, active after diauxic shift, binds carbon source responsive elements		Fungal Zn(2)-Cys(6) binuclear cluster domain Fungal specific transcription factor domain	CAT8	Predicted zinc-cluster protein; null mutant shows a defect in transcription of JEN1 lactate permease gene; flucytosine repressed; similar to S. cerevisiae Cat8p but mutant phenotype suggests that it has a different set of target genes
YALI0B10131g	2.57213	1.36296	0.000122825	0.000507353	UP		similar to uniprot|P38256 Saccharomyces cerevisiae YBR096w Hypothetical 27.1 kDa protein	YBR096W		Putative protein of unknown function; green fluorescent protein (GFP)-fusion protein localizes to the ER		Thioesterase-like superfamily
YALI0A18029g	2.5711	1.36239	0.000142807	0.000576035	UP		no similarity, hypothetical start
YALI0A16819g	2.56831	1.36082	8.95159e-06	4.83584e-05	UP		weakly similar to uniprot|P43093 Candida albicans Candidapepsin 4 precursor (Aspartate protease 4)	YLR121C	YPS3	Aspartic protease, attached to the plasma membrane via a glycosylphosphatidylinositol (GPI) anchor	SIMILAR TO	Eukaryotic aspartyl protease	SAP4	Secreted aspartyl proteinase; sap4 sap5 sap6 triple mutant is defective in protein utilization for nitrogen; assessment of virulence role complicated by URA3 effects; expressed during mucosal and systemic infections
YALI0E07513g	2.5658	1.35941	3.72289e-07	2.59053e-06	UP		weakly similar to DEHA0D18975g Debaryomyces hansenii, hypothetical start					Protein of unknown function (DUF1749)	orf19.1637
YALI0E24277g	2.56336	1.35803	0.000913829	0.00300184	UP		weakly similar to uniprot|Q8WZK9 Neurospora crassa, hypothetical start					Fungal Zn(2)-Cys(6) binuclear cluster domain
YALI0A12023g	2.56293	1.3578	6.29907e-06	3.50113e-05	UP	STS1	Tethering factor for nuclear proteasome STS1	YIR011C	STS1	Protein that interacts with the karyopherin Srp1p; may have a role with Srp1p in ubiquitin-mediated protein degradation		Cut8	orf19.4849	possibly an essential gene, disruptants not obtained by UAU1 method
YALI0D00759g	2.55236	1.35183	0.00776849	0.0196856	UP		weakly similar to uniprot|P32804 Saccharomyces cerevisiae YGL255w ZRT1 high-affinity zinc transport protein	YLR130C	ZRT2	Low-affinity zinc transporter of the plasma membrane; transcription is induced under low-zinc conditions by the Zap1p transcription factor	SIMILAR TO	ZIP Zinc transporter
YALI0E03322g	2.54563	1.34802	0.00538581	0.0143524	UP		weakly similar to DEHA0A13277g Debaryomyces hansenii, hypothetical start
YALI0D18854g	2.54454	1.3474	3.73894e-07	2.59885e-06	UP		similar to uniprot|P35200 Saccharomyces cerevisiae YLR168C MSF1 protein	YLR168C	UPS2	Mitochondrial intermembrane space protein involved in regulation of mitochondrial cardiolipin and phosphatidylethanolamine levels; null has defects in mitochondrial morphology; similar to Ups1p, Ups3p and to human PRELI		PRELI-like family	orf19.3089
YALI0B01012g	2.54382	1.34699	6.83823e-05	0.000301271	UP		no similarity, hypothetical start
YALI0A10010g	2.54142	1.34563	2.22264e-05	0.000110836	UP		similar to uniprot|Q8NIR4 Neurospora crassa Conserved hypothetical protein, hypothetical start					Phytanoyl-CoA dioxygenase (PhyH)
YALI0E33627g	2.53826	1.34384	0.00219335	0.00647808	UP	RIM9	pH-response regulator protein palI/RIM9	YMR063W	RIM9	Protein of unknown function, involved in the proteolytic activation of Rim101p in response to alkaline pH; has similarity to A. nidulans PalI; putative membrane protein		SUR7/PalI family	SDF1	Protein not essential for viability
YALI0E34793g	2.53713	1.3432	4.7895e-08	3.8712e-07	UP		highly similar to uniprot|Q8X097 Neurospora crassa Probable ATP citrate lyase subunit 1	YOR142W	LSC1	Alpha subunit of succinyl-CoA ligase, which is a mitochondrial enzyme of the TCA cycle that catalyzes the nucleotide-dependent conversion of succinyl-CoA to succinate; phosphorylated	SIMILAR TO	CoA-ligase CoA binding domain Citrate synthase
YALI0B17248g	2.53543	1.34223	2.28499e-05	0.00011341	UP	MTC6	Maintenance of telomere capping protein 6	YHR151C	MTC6	Protein of unknown function; mtc6 is synthetically sick with cdc13-1			orf19.5971
YALI0F06688g	2.52978	1.33901	1.98337e-05	9.94504e-05	UP		highly similar to uniprot|Q7S0S0 Neurospora crassa NCU09013.1 and uniprot|O14155 Schizosaccharomyces pombe SPAC4A8.02C. gene, start by similarity					Uncharacterised protein family UPF0047	orf19.3016
YALI0B09471g	2.52865	1.33837	4.52066e-07	3.06835e-06	UP		similar to uniprot|O60121 Schizosaccharomyces pombe Stomatin family protein, hypothetical start					SPFH domain / Band 7 family	SLP2	similar to stomatin mechanoreception protein
YALI0C02849g	2.5211	1.33405	3.19977e-07	2.268e-06	UP		some similarities with uniprot|P38757 Saccharomyces cerevisiae YHR004c NEM1 required for nuclear morphology	YHR004C	NEM1	Probable catalytic subunit of Nem1p-Spo7p phosphatase holoenzyme; regulates nuclear growth by controlling phospholipid biosynthesis, required for normal nuclear envelope morphology and sporulation; homolog of the human protein Dullard		NLI interacting factor-like phosphatase	orf19.4657
YALI0F04972g	2.51676	1.33156	0.000471345	0.00166359	UP		weakly similar to KLLA0B09108g Kluyveromyces lactis IPF 7279.1, start by similarity					Protein of unknown function (DUF3074)
YALI0E07898g	2.51521	1.33068	0.00908255	0.0225749	UP		weakly similar to uniprot|P35190 Saccharomyces cerevisiae YGL215w CLG1 cyclin-like protein	YGL215W	CLG1	Cyclin-like protein that interacts with Pho85p; has sequence similarity to G1 cyclins PCL1 and PCL2		Cyclin
YALI0E04312g	2.51497	1.33054	4.40478e-06	2.51425e-05	UP		weakly similar to uniprot|O74390 Schizosaccharomyces pombe SPBC28E12.06C Putative transport protein	YCR032W	BPH1	PProtein homologous to human Chediak-Higashi syndrome and murine Beige proteins, which are implicated in disease syndromes due to defective lysosomal trafficking; mutant phenotype and genetic interactions suggest a role in protein sorting		Concanavalin A-like lectin/glucanases superfamily Beige/BEACH domain	BPH1	Protein not essential for viability; similar to S. cerevisiae Bph1p, which is a putative ortholog of human Chediak-Higashi syndrome protein and murine beige gene implicated in disease syndromes involving defective lysosomal trafficking
YALI0C06083g	2.51407	1.33003	9.25818e-05	0.000394217	UP	HEM1	5-aminolevulinate synthase, mitochondrial (EC 2.3.1.37) (5-aminolevulinic acid synthase) (Delta-ALA synthase) (Delta-aminolevulinate synthase)	YDR232W	HEM1	5-aminolevulinate synthase, catalyzes the first step in the heme biosynthetic pathway; an N-terminal signal sequence is required for localization to the mitochondrial matrix; expression is regulated by Hap2p-Hap3p		Aminotransferase class I and II
YALI0D09317g	2.51219	1.32895	7.83376e-06	4.26826e-05	UP		weakly similar to DEHA0C16291g Debaryomyces hansenii IPF 3459.1, start by similarity					Magnesium transporter NIPA	orf19.192
YALI0B12342g	2.51167	1.32865	4.54688e-05	0.000209625	UP		weakly similar to uniprot|P40578 Saccharomyces cerevisiae YIR033W MGA2 protein	YIR033W	MGA2	ER membrane protein involved in regulation of OLE1 transcription, acts with homolog Spt23p; inactive ER form dimerizes and one subunit is then activated by ubiquitin/proteasome-dependent processing followed by nuclear targeting		IPT/TIG domain Ankyrin repeats (many copies)	SPT23	Protein involved in regulation of unsaturated fatty acid biosynthesis; controls the expression of the Ole1p delta-9-fatty acid desaturase
YALI0C03894g	2.5108	1.32814	0.00699586	0.0181111	UP		weakly similar to DEHA0F04158g Debaryomyces hansenii IPF 8785.1, hypothetical start
YALI0F17336g	2.50147	1.32278	1.00161e-05	5.35626e-05	UP		no similarity, hypothetical start
YALI0F25795g	2.50118	1.32261	0.000947711	0.00309394	UP		similar to uniprot|P50276 Saccharomyces cerevisiae YGR055w MUP1 high affinity methionine permease	YGR055W	MUP1	High affinity methionine permease, integral membrane protein with 13 putative membrane-spanning regions; also involved in cysteine uptake		Amino acid permease	MUP1	Alkaline upregulated by Rim101p
YALI0D00803g	2.49863	1.32114	2.02876e-07	1.47976e-06	UP		weakly similar to uniprot|Q9P7X2 Schizosaccharomyces pombe Hypothetical coiled-coil protein, hypothetical start					RNA polymerase II elongation factor ELL
YALI0F24035g	2.49861	1.32113	0.00133847	0.00419709	UP		similar to CA1798|IPF11448 Candida albicans IPF11448 unknown function	YMR155W		Putative protein of unknown function; identified as interacting with Hsp82p in a high-throughput two-hybrid screen	SIMILAR TO	Nodulin-like
YALI0C21582g	2.49349	1.31817	3.30111e-07	2.33022e-06	UP		similar to uniprot|Q8X073 Neurospora crassa Related to pyruvate dehydrogenase kinase	YIL042C	PKP1	Mitochondrial protein kinase involved in negative regulation of pyruvate dehydrogenase complex activity by phosphorylating the ser-133 residue of the Pda1p subunit; acts in concert with kinase Pkp2p and phosphatases Ptc5p and Ptc6p	SIMILAR TO	Mitochondrial branched-chain alpha-ketoacid dehydrogenase kinase Histidine kinase-, DNA gyrase B-, and HSP90-like ATPase
YALI0B12078g	2.49267	1.31769	4.78268e-07	3.22551e-06	UP		similar to uniprot|Q02046 Saccharomyces cerevisiae YKR080W Methylenetetrahydrofolate dehydrogenase [NAD+] (EC 1.5.1.15)	YKR080W	MTD1	NAD-dependent 5,10-methylenetetrahydrafolate dehydrogenase, plays a catalytic role in oxidation of cytoplasmic one-carbon units; expression is regulated by Bas1p and Bas2p, repressed by adenine, and may be induced by inositol and choline		Tetrahydrofolate dehydrogenase/cyclohydrolase, NAD(P)-binding domain Tetrahydrofolate dehydrogenase/cyclohydrolase, catalytic domain	orf19.3810
YALI0F27665g	2.49251	1.3176	1.67105e-06	1.02771e-05	UP		similar to uniprot|O94505 Schizosaccharomyces pombe 3 (2 ) 5 -bisphosphate nucleotidase	YOL064C	MET22	Bisphosphate-3'-nucleotidase, involved in salt tolerance and methionine biogenesis; dephosphorylates 3'-phosphoadenosine-5'-phosphate and 3'-phosphoadenosine-5'-phosphosulfate, intermediates of the sulfate assimilation pathway		Inositol monophosphatase family	HAL22	Putative phosphoadenosine-5'-phosphate (PAP) or 3'-phosphoadenosine 5'-phosphosulfate (PAPS) phosphatase; possible role in sulfur recycling; induced upon biofilm formation
YALI0E11330g	2.49174	1.31716	0.0164842	0.0380562	UP		some similarities with uniprot|A2E345 Trichomonas vaginalis Myb-like DNA-binding domain containing protein
YALI0D24926g	2.49024	1.31628	0.000267507	0.00100382	UP	MDM34	Mitochondrial distribution and morphology protein 34	YGL219C	MDM34	Mitochondrial component of the ERMES complex that links the ER to mitochondria and may promote inter-organellar calcium and phospholipid exchange as well as coordinating mitochondrial DNA replication and growth		Putative integral membrane protein conserved region (DUF2404)	MDM34	Putative transcription factor with zinc finger DNA-binding motif; macrophage-downregulated gene
YALI0E13508g	2.48596	1.3138	2.5605e-06	1.52741e-05	UP		similar to uniprot|P25294 Saccharomyces cerevisiae YNL007c SIS1 heat shock protein	YNL007C	SIS1	Type II HSP40 co-chaperone that interacts with the HSP70 protein Ssa1p; not functionally redundant with Ydj1p due to due to substrate specificity; shares similarity with bacterial DnaJ proteins		DnaJ domain DnaJ C terminal domain
YALI0F28589g	2.47971	1.31017	0.00514731	0.0138153	UP		weakly similar to uniprot|Q8XU27 Ralstonia solanacearum hypothetical protein RSc3367 and uniprot|Q89QU4 Bradyrhizobium japonicum Blr3030 protein, hypothetical start					CoA-transferase family III	orf19.4571
YALI0F25861g	2.47364	1.30663	4.07431e-07	2.80739e-06	UP		weakly similar to uniprot|Q03465 Saccharomyces cerevisiae YDL020c SON1 26S proteasome subunit	YDL020C	RPN4	Transcription factor that stimulates expression of proteasome genes; Rpn4p levels are in turn regulated by the 26S proteasome in a negative feedback control mechanism; RPN4 is transcriptionally regulated by various stress responses		Zinc finger, C2H2 type	RPN4	DNA binding protein with Cys2-His2 zinc-finger; putative regulator of proteasome genes; DNA recognition sequence (GAAGGCAAAA) enriched in regions upstream of proteasome genes; induced in core stress response
YALI0E07161g	2.47197	1.30566	0.0109098	0.0265353	UP	IPK1	Inositol-pentakisphosphate 2-kinase (EC 2.7.1.158) (Inositol-1,3,4,5,6-pentakisphosphate 2-kinase) (Ins(1,3,4,5,6)P5 2-kinase) (InsP5 2-kinase)					Inositol-pentakisphosphate 2-kinase
YALI0E21175g	2.46556	1.30192	1.23912e-07	9.37161e-07	UP		weakly similar to uniprot|P32843 Saccharomyces cerevisiae YMR302c PRP12 involved in early maturation of pre-rRNA	YMR302C	YME2	Integral inner mitochondrial membrane protein with a role in maintaining mitochondrial nucleoid structure and number; mutants exhibit an increased rate of mitochondrial DNA escape; shows some sequence similarity to exonucleases		RNA12 protein RNA recognition motif. (a.k.a. RRM, RBD, or RNP domain)
YALI0C02211g	2.46341	1.30066	7.00934e-07	4.605e-06	UP		similar to DEHA0G24266g Debaryomyces hansenii IPF 4821.1 or DEHA0E23661g Debaryomyces hansenii IPF 11058.1	YMR221C		Putative protein of unknown function; the authentic, non-tagged protein is detected in highly purified mitochondria in high-throughput studies; physical interaction with Atg27p suggests a possible role in autophagy
YALI0E11209g	2.4634	1.30065	0.000876634	0.00289764	UP		weakly similar to uniprot|Q6BZV2 Yarrowia lipolytica YALI0F30657g, hypothetical start
YALI0F15587g	2.46107	1.29928	5.47188e-08	4.35625e-07	UP		Transaldolase (EC 2.2.1.2)	YLR354C	TAL1	Transaldolase, enzyme in the non-oxidative pentose phosphate pathway; converts sedoheptulose 7-phosphate and glyceraldehyde 3-phosphate to erythrose 4-phosphate and fructose 6-phosphate		Transaldolase
YALI0F16357g	2.45698	1.29688	1.69074e-07	1.25044e-06	UP		weakly similar to DEHA0C03839g Debaryomyces hansenii	YHL021C	AIM17	Putative protein of unknown function; the authentic, non-tagged protein is detected in highly purified mitochondria in high-throughput studies; null mutant displays reduced frequency of mitochondrial genome loss		Taurine catabolism dioxygenase TauD, TfdA family	orf19.7131	Butyrobetaine dioxygenase, the fourth enzyme of the carnitine biosynthesis pathway
YALI0F22429g	2.45695	1.29687	1.36411e-06	8.5719e-06	UP		similar to uniprot|P47131 Saccharomyces cerevisiae YJR085C Putative protein of unknown function					Transmembrane proteins 14C
YALI0F26873g	2.4568	1.29678	2.94042e-06	1.73449e-05	UP		similar to uniprot|Q9C271 Neurospora crassa probable cell division control protein CDC12	YHR107C	CDC12	Component of the septin ring of the mother-bud neck that is required for cytokinesis; septins recruit proteins to the neck and can act as a barrier to diffusion at the membrane, and they comprise the 10nm filaments seen with EM	SIMILAR TO	Septin
YALI0F31955g	2.45446	1.29541	1.93735e-06	1.18006e-05	UP		weakly similar to uniprot|P15731 Saccharomyces cerevisiae YBR082c UBC4 E2 ubiquitin-conjugating enzyme	YDR054C	CDC34	Ubiquitin-conjugating enzyme (E2) and catalytic subunit of SCF ubiquitin-protein ligase complex (together with Skp1p, Rbx1p, Cdc53p, and an F-box protein) that regulates cell cycle progression by targeting key substrates for degradation	SIMILAR TO	Ubiquitin-conjugating enzyme	UBC15
YALI0E21780g	2.45405	1.29516	4.70528e-06	2.67616e-05	UP	AKR1	Palmitoyltransferase AKR1 (EC 2.3.1.-) (Ankyrin repeat-containing protein AKR1)	YDR264C	AKR1	Palmitoyl transferase involved in protein palmitoylation; acts as a negative regulator of pheromone response pathway; required for endocytosis of pheromone receptors; involved in cell shape control; contains ankyrin repeats		DHHC palmitoyltransferase Ankyrin repeats (many copies) Ankyrin repeats (3 copies)	AKR1	Ankyrin-repeat protein; increased transcription is observed upon fluphenazine treatment
YALI0F14069g	2.4539	1.29507	5.26366e-06	2.96981e-05	UP		Serine/threonine-protein phosphatase (EC 3.1.3.16)	YDL188C	PPH22	Catalytic subunit of protein phosphatase 2A (PP2A), functionally redundant with Pph21p; methylated at C terminus; forms alternate complexes with several regulatory subunits; involved in signal transduction and regulation of mitosis	SIMILAR TO	Calcineurin-like phosphoesterase
YALI0B20020g	2.45369	1.29495	1.41022e-07	1.06151e-06	UP		Phospho-2-dehydro-3-deoxyheptonate aldolase (EC 2.5.1.54) (3-deoxy-D-arabino-heptulosonate 7-phosphate synthase) (DAHP synthase) (Phospho-2-keto-3-deoxyheptonate aldolase)	YDR035W	ARO3	3-deoxy-D-arabino-heptulosonate-7-phosphate (DAHP) synthase, catalyzes the first step in aromatic amino acid biosynthesis and is feedback-inhibited by phenylalanine or high concentration of tyrosine or tryptophan		DAHP synthetase I family	ARO3	3-Deoxy-D-arabinoheptulosonate-7-phosphate synthase; enzyme of aromatic amino acid biosynthesis; GCN-regulated; feedback-inhibited by phenylalanine when heterologously produced in S. cerevisiae; Aro3p and Aro4p catalyze the same reaction
YALI0B04004g	2.44993	1.29274	2.22648e-05	0.00011094	UP		similar to uniprot|Q08777 Saccharomyces cerevisiae Chromosome XV reading frame ORF YOR306C	YOR306C	MCH5	Plasma membrane riboflavin transporter; facilitates the uptake of vitamin B2; required for FAD-dependent processes; sequence similarity to mammalian monocarboxylate permeases, however mutants are not deficient in monocarboxylate transport		Major Facilitator Superfamily	orf19.6263	Predicted membrane transporter, member of the monocarboxylate porter (MCP) family, major facilitator superfamily (MFS)
YALI0E33363g	2.44789	1.29154	0.0180363	0.0410992	UP		similar to uniprot|Q92389 Yarrowia lipolytica AXP1 Acid extracellular protease precursor	YLR121C	YPS3	Aspartic protease, attached to the plasma membrane via a glycosylphosphatidylinositol (GPI) anchor	SIMILAR TO	Eukaryotic aspartyl protease
YALI0A20790g	2.44521	1.28996	0.0159237	0.036948	UP		no similarity, hypothetical start					BTB/POZ domain
YALI0F05434g	2.44512	1.28991	0.00106972	0.00344099	UP		some similarities with uniprot|Q9P501 Neurospora crassa B24P11.150 Conserved hypothetical protein, hypothetical start					Ring finger domain
YALI0C07040g	2.44368	1.28905	0.00016938	0.000668784	UP		weakly similar to uniprot|P32588 Saccharomyces cerevisiae YNL016w Nuclear and cytoplasmic polyadenylated RNA-binding protein PUB1 (ARS consensus binding protein ACBP-60) (Poly(U)-binding protein)	YNL016W	PUB1	Poly (A)+ RNA-binding protein, abundant mRNP-component protein that binds mRNA and is required for stability of many mRNAs; component of glucose deprivation induced stress granules, involved in P-body-dependent granule assembly		RNA recognition motif. (a.k.a. RRM, RBD, or RNP domain)	orf19.7368
YALI0C05863g	2.44224	1.2882	0.000907516	0.00298573	UP		no similarity, hypothetical start
YALI0B06413g	2.44047	1.28716	8.04709e-08	6.25743e-07	UP		similar to uniprot|Q03558 Saccharomyces cerevisiae YHR179w OYE2 NADPH dehydrogenase (old yellow enzyme) isoform 1	YHR179W	OYE2	Widely conserved NADPH oxidoreductase containing flavin mononucleotide (FMN), homologous to Oye3p with slight differences in ligand binding and catalytic properties; may be involved in sterol metabolism	SIMILAR TO	NADH:flavin oxidoreductase / NADH oxidase family
YALI0F19316g	2.44024	1.28702	0.000802532	0.00268624	UP		no similarity, start identified by cDNA
YALI0C18359g	2.44003	1.2869	2.9618e-06	1.74387e-05	UP		some similarities with uniprot|Q03455 Saccharomyces cerevisiae YDR205w MSC2	YDR205W	MSC2	Member of the cation diffusion facilitator family, localizes to the endoplasmic reticulum and nucleus; mutations affect the cellular distribution of zinc and also confer defects in meiotic recombination between homologous chromatids		Cation efflux family	orf19.3132	induced by nitric oxide
YALI0E32989g	2.43958	1.28664	3.1028e-05	0.000148658	UP		no similarity, hypothetical start
YALI0C16500g	2.4356	1.28428	0.00161407	0.00496811	UP		weakly similar to uniprot|O59671 Schizosaccharomyces pombe Pof4 protein, hypothetical start					RNA polymerase II transcription factor SIII (Elongin) subunit A	orf19.1028
YALI0F09537g	2.42665	1.27897	0.000335451	0.00122267	UP		no similarity, possibly noncoding, hypothetical start
YALI0D01221g	2.42227	1.27636	6.50777e-05	0.00028791	UP		weakly similar to uniprot|P34225 Saccharomyces cerevisiae YBL060w, start by similarity					Sec7 domain
YALI0F28545g	2.42085	1.27552	1.05107e-06	6.7381e-06	UP		weakly similar to DEHA0A11044g Debaryomyces hansenii, start by similarity					Fungal family of unknown function (DUF1776)
YALI0E18117g	2.41844	1.27408	6.91797e-05	0.000303804	UP		E3 ubiquitin-protein ligase (EC 6.3.2.-)	YER125W	RSP5	Ubiquitin-protein ligase involved in ubiquitin-mediated protein degradation; functions in multivesicular body sorting, heat shock response and ubiquitylation of arrested RNAPII; contains a hect (homologous to E6-AP carboxyl terminus) domain		WW domain HECT-domain (ubiquitin-transferase) C2 domain	RSP5	induced during infection of murine kidney, compared to growth in vitro; has murine homolog; possibly an essential gene, disruptants not obtained by UAU1 method
YALI0E33033g	2.41812	1.27389	6.40325e-07	4.23307e-06	UP		Phosphoribosylaminoimidazole-succinocarboxamide synthase (EC 6.3.2.6)	YAR015W	ADE1	N-succinyl-5-aminoimidazole-4-carboxamide ribotide (SAICAR) synthetase, required for 'de novo' purine nucleotide biosynthesis; red pigment accumulates in mutant cells deprived of adenine		SAICAR synthetase	ADE1	Phosphoribosylaminoimadazole succinocarboxamide synthetase, enzyme of adenine biosynthesis; not induced during GCN response, in contrast to the S. cerevisiae ortholog; fungal-specific (no human or murine homolog)
YALI0E15664g	2.41533	1.27222	8.68716e-06	4.709e-05	UP		weakly similar to DEHA0D10483g Debaryomyces hansenii, hypothetical start					Dyggve-Melchior-Clausen syndrome protein	orf19.2996
YALI0F02013g	2.41255	1.27056	1.45574e-06	9.05813e-06	UP		similar to uniprot|O14295 Schizosaccharomyces pombe SPAC9E9.11 Pyridoxal reductase	YPR127W		Protein of unknown function, differentially expressed during alcoholic fermentation; expression activated by transcription factor YRM1/YOR172W; green fluorescent protein (GFP)-fusion protein localizes to both the cytoplasm and the nucleus		Aldo/keto reductase family
YALI0E31405g	2.41145	1.2699	4.73821e-06	2.68767e-05	UP		similar to ca|CA5025|CaAMI3 Candida albicans CaAMI3 protein required for normal mitochondrial structure (by homology)	YOL060C	MAM3	Protein required for normal mitochondrial morphology, has similarity to hemolysins		Domain of unknown function DUF21	orf19.6979	intron in 5'-UTR
YALI0E05247g	2.41085	1.26954	1.88612e-06	1.15216e-05	UP		similar to uniprot|P32319 Saccharomyces cerevisiae YBL017c PEP1 vacuolar protein sorting/targeting protein	YBL017C	PEP1	Type I transmembrane sorting receptor for multiple vacuolar hydrolases; cycles between the late-Golgi and prevacuolar endosome-like compartments			orf19.3767
YALI0C01111g	2.40872	1.26826	2.26056e-06	1.35869e-05	UP		similar to uniprot|P38145 Saccharomyces cerevisiae YBR256C Riboflavin synthase alpha chain (EC 2.5.1.9)	YBR256C	RIB5	Riboflavin synthase; catalyzes the last step of the riboflavin biosynthesis pathway		Lumazine binding domain	RIB5	Putative riboflavin synthase; fungal-specific (no human or murine homolog); farnesol-downregulated; protein detected by mass spec in exponential and stationary phase cultures
YALI0F07953g	2.4071	1.2673	3.68003e-06	2.13314e-05	UP		weakly similar to uniprot|P46973 Saccharomyces cerevisiae YJR055w HIT1 required for growth at high temperature	YJR055W	HIT1	Protein of unknown function, required for growth at high temperature		HIT zinc finger	HIT1	Protein not essential for viability; similar to S. cerevisiae Hit1p, which is required for growth at high temperature
YALI0E11121g	2.40663	1.26701	4.94686e-05	0.000225772	UP		weakly similar to uniprot|Q10260 Schizosaccharomyces pombe Hypothetical protein C56F8.12 in chromosome I, hypothetical start					Protein of unknown function (DUF2434)
YALI0E30899g	2.40441	1.26568	4.83049e-06	2.73757e-05	UP		Serine/threonine-protein phosphatase (EC 3.1.3.16)	YML016C	PPZ1	Serine/threonine protein phosphatase Z, isoform of Ppz2p; involved in regulation of potassium transport, which affects osmotic stability, cell cycle progression, and halotolerance		Calcineurin-like phosphoesterase
YALI0F08899g	2.40204	1.26426	2.7607e-06	1.63455e-05	UP		weakly similar to CAGL0M06259g Candida glabrata and uniprot|P38297 Saccharomyces cerevisiae YBR179c FZO1 required for biogenesis of mitochondria	YBR179C	FZO1	Mitofusin, mitochondrial integral membrane protein involved in mitochondrial fusion and mitochondrial genome maintenance; contains N-terminal GTPase domain; targeted for destruction by cytosolic components of the ubiquitin-proteasome system		Dynamin family	FZO1	Putative mitochondrial biogenesis protein; fungal-specific (no human or murine homolog)
YALI0D24189g	2.39234	1.25842	6.19305e-06	3.45127e-05	UP		similar to uniprot|P53049 Saccharomyces cerevisiae YGR281W Oligomycin resistance ATP-dependent permease YOR1 no start	YGR281W	YOR1	Plasma membrane ATP-binding cassette (ABC) transporter, multidrug transporter mediates export of many different organic anions including oligomycin; similar to human cystic fibrosis transmembrane receptor (CFTR)		ABC transporter transmembrane region ABC transporter	YOR1	Protein similar to S. cerevisiae Yor1p, which is a plasma membrane transporter of the ATP-binding cassette (ABC) family involved in resistance to aureobasidin A; transcription is specific to white cell type
YALI0C00847g	2.38984	1.25692	2.29137e-05	0.000113638	UP		similar to DEHA0A10670g Debaryomyces hansenii IPF 7135.1	YBR180W	DTR1	Putative dityrosine transporter, required for spore wall synthesis; expressed during sporulation; member of the major facilitator superfamily (DHA1 family) of multidrug resistance transporters	SIMILAR TO	Major Facilitator Superfamily
YALI0E04488g	2.38583	1.25449	0.010599	0.0258684	UP		weakly similar to uniprot|Q96U38 Neurospora crassa B2J23.080, start by similarity					Catalytic LigB subunit of aromatic ring-opening dioxygenase	orf19.6898	increased transcription is observed upon benomyl treatment or in an azole-resistant strain that overexpresses MDR1
YALI0E32813g	2.38259	1.25253	1.22e-06	7.7429e-06	UP		similar to uniprot|Q02981 Saccharomyces cerevisiae YPL109c similarity to aminoglycoside acetyltransferase regulator from P. stuartii singleton, hypothetical start					ABC1 family	orf19.4575
YALI0E07832g	2.38242	1.25243	0.00185661	0.00558742	UP		weakly similar to uniprot|Q01589 Saccharomyces cerevisiae YDR077w SED1 abundant cell surface glycoprotein, hypothetical start
YALI0B01562g	2.3801	1.25102	9.1516e-05	0.000390202	UP		no similarity, hypothetical start					Mago binding
YALI0F02277g	2.37642	1.24879	4.57431e-05	0.000210737	UP		similar to wi|NCU06713.1 Neurospora crassa NCU06713. 1 hypothetical protein	YJR044C	VPS55	Late endosomal protein involved in late endosome to vacuole trafficking; functional homolog of human obesity receptor gene-related protein (OB-RGRP)		Vacuolar protein sorting 55	orf19.7184
YALI0B20812g	2.36925	1.24443	0.00270758	0.00780457	UP		similar to uniprot|P00729 Saccharomyces cerevisiae YMR297w PRC1 carboxypeptidase y serine-type protease P3.65. f3.1	YBR139W		Putative serine type carboxypeptidase with a role in phytochelatin synthesis; green fluorescent protein (GFP)-fusion protein localizes to the vacuole; expression induced by nitrogen limitation in a GLN3, GAT1-independent manner	SIMILAR TO	Serine carboxypeptidase
YALI0F20592g	2.36922	1.24441	2.64139e-06	1.57123e-05	UP		similar to uniprot|P14904 Saccharomyces cerevisiae YKL103c LAP4 aminopeptidase yscI precursor vacuolar	YKL103C	LAP4	Vacuolar aminopeptidase yscI; zinc metalloproteinase that belongs to the peptidase family M18; often used as a marker protein in studies of autophagy and cytosol to vacuole targeting (CVT) pathway	SIMILAR TO	Aminopeptidase I zinc metalloprotease (M18)
YALI0A00847g	2.36318	1.24073	6.64732e-06	3.68155e-05	UP		similar to uniprot|O59826 Schizosaccharomyces pombe Putative potassium channel subunit	YPL088W		Putative aryl alcohol dehydrogenase; transcription is activated by paralogous transcription factors Yrm1p and Yrr1p along with genes involved in multidrug resistance	SIMILAR TO	Aldo/keto reductase family
YALI0E16346g	2.35685	1.23686	3.19161e-08	2.66443e-07	UP		highly similar to uniprot|O13426 Candida albicans Serine hydroxymethyltransferase cytosolic (EC 2.1.2.1) (Serine methylase) (Glycine hydroxymethyltransferase) (SHMT) (SHMII)	YLR058C	SHM2	Cytosolic serine hydroxymethyltransferase, converts serine to glycine plus 5,10 methylenetetrahydrofolate; major isoform involved in generating precursors for purine, pyrimidine, amino acid, and lipid biosynthesis		Serine hydroxymethyltransferase	SHM2	Cytoplasmic serine hydroxymethyltransferase; complements the glycine auxotrophy of an S. cerevisiae shm1 null shm2 null gly1-1 triple mutant; antigenic in human; soluble protein in hyphae; farnesol-upregulated in biofilm
YALI0F04686g	2.35467	1.23552	0.00221142	0.00652237	UP		weakly similar to wi|NCU08597.1 Neurospora crassa NCU08597.1 hypothetical protein, hypothetical start					Protein of unknown function (DUF1765)
YALI0E01606g	2.35354	1.23483	2.70076e-06	1.60205e-05	UP		no similarity, hypothetical start					Fungal Zn(2)-Cys(6) binuclear cluster domain
YALI0F27269g	2.34847	1.23172	6.99723e-06	3.86215e-05	UP		no similarity, hypothetical start					Rogdi leucine zipper containing protein
YALI0B21692g	2.34832	1.23163	2.45382e-05	0.000120473	UP		weakly similar to uniprot|Q9LFS7 Arabidopsis thaliana Hypothetical 38.2 kDa protein, start by similarity					short chain dehydrogenase
YALI0B13970g	2.34627	1.23037	0.000267312	0.00100369	UP		similar to uniprot|P32191 Saccharomyces cerevisiae YIL155c GUT2 glycerol-3-phosphate dehydrogenase mitochondrial	YIL155C	GUT2	Mitochondrial glycerol-3-phosphate dehydrogenase; expression is repressed by both glucose and cAMP and derepressed by non-fermentable carbon sources in a Snf1p, Rsf1p, Hap2/3/4/5 complex dependent manner		FAD dependent oxidoreductase	GUT2	Glycerol-3-phosphate dehydrogenase; Plc1p-regulated; transcription is upregulated in both intermediate and mature biofilms
YALI0E12199g	2.34537	1.22982	9.39521e-06	5.06258e-05	UP		some similarities with uniprot|P50108 Saccharomyces cerevisiae YDR245w MNN10 subunit of mannosyltransferase complex	YDR245W	MNN10	Subunit of a Golgi mannosyltransferase complex also containing Anp1p, Mnn9p, Mnn11p, and Hoc1p that mediates elongation of the polysaccharide mannan backbone; membrane protein of the mannosyltransferase family	SIMILAR TO	galactosyl transferase GMA12/MNN10 family
YALI0A20020g	2.34516	1.22968	0.000291543	0.00108125	UP		highly similar to uniprot|Q6CH18 Yarrowia lipolytica YALI0A13673g, start by similarity, pseudogene
YALI0C10967g	2.3399	1.22645	3.16792e-05	0.00015155	UP	SSN3	Serine/threonine-protein kinase SSN3 (EC 2.7.11.22) (EC 2.7.11.23) (Cyclin-dependent kinase 8)	YPL042C	SSN3	Cyclin-dependent protein kinase, component of RNA polymerase II holoenzyme; involved in phosphorylation of the RNA polymerase II C-terminal domain; involved in glucose repression		Protein kinase domain	SSN3	mutants are sensitive to growth on H2O2 medium
YALI0F31845g	2.33963	1.22628	6.7972e-06	3.75501e-05	UP		similar to uniprot|P39109 Saccharomyces cerevisiae YDR135c YCF1 glutathione S-conjugate transporter	YDR135C	YCF1	Vacuolar glutathione S-conjugate transporter of the ATP-binding cassette family, has a role in detoxifying metals such as cadmium, mercury, and arsenite; also transports unconjugated bilirubin; similar to human cystic fibrosis protein CFTR	SIMILAR TO	ABC transporter transmembrane region ABC transporter
YALI0B07601g	2.33827	1.22544	0.00107479	0.00345378	UP		weakly similar to uniprot|Q06991 Saccharomyces cerevisiae YLR414C SIMILARITY to hypothetical 81 kDa protein in CNB1-ORD1 intergenic region	YLR414C		Putative protein of unknown function; localizes to bud and cytoplasm; co-localizes with Sur7p in punctate patches in the plasma membrane; null mutant displays decreased thermotolerance; transcription induced on cell wall damage		SUR7/PalI family
YALI0D02024g	2.3371	1.22472	3.50787e-05	0.000166434	UP		some similarities with uniprot|P07267 Saccharomyces cerevisiae YPL154c PEP4 aspartyl protease	YPL154C	PEP4	Vacuolar aspartyl protease (proteinase A), required for the posttranslational precursor maturation of vacuolar proteinases; important for protein turnover after oxidative damage; synthesized as a zymogen, self-activates	SIMILAR TO	Eukaryotic aspartyl protease
YALI0A11935g	2.3333	1.22237	0.00175637	0.00532613	UP		no similarity, hypothetical start
YALI0D10417g	2.33169	1.22138	4.39359e-07	2.9949e-06	UP		no similarity, hypothetical start
YALI0D21582g	2.33024	1.22048	9.01404e-07	5.84349e-06	UP		some similarities with uniprot|Q87HL8 Vibrio parahaemolyticus Conserved hypothetical protein and uniprot|Q88HQ8 Pseudomonas putida YeeE/YedE family protein, hypothetical start					Sulphur transport Domain of unknown function (DUF4341)
YALI0E17589g	2.3268	1.21835	0.000865523	0.00286688	UP		similar to uniprot|Q06593 Saccharomyces cerevisiae YPR194C	YPR194C	OPT2	Oligopeptide transporter; member of the OPT family, with potential orthologs in S. pombe and C. albicans; also plays a role in formation of mature vacuoles	SIMILAR TO	OPT oligopeptide transporter protein
YALI0F18458g	2.32647	1.21814	3.00286e-07	2.13391e-06	UP		weakly similar to DEHA-IPF8330.1 Debaryomyces hansenii IPF 8330.1, hypothetical start					Bacterial regulatory helix-turn-helix proteins, AraC family	ADAEC	Transcription is specific to white cell type
YALI0E09757g	2.3247	1.21705	5.39463e-06	3.03561e-05	UP		some similarities with KLLA0F27225g Kluyveromyces lactis, hypothetical start
YALI0E11803g	2.3207	1.21456	1.76682e-05	8.93681e-05	UP		weakly similar to uniprot|P38116 Saccharomyces cerevisiae YBR164c ARL1 ADP-ribosylation factor	YDL137W	ARF2	ADP-ribosylation factor, GTPase of the Ras superfamily involved in regulation of coated formation vesicles in intracellular trafficking within the Golgi; functionally interchangeable with Arf1p	SIMILAR TO	ADP-ribosylation factor family
YALI0C23342g	2.31781	1.21276	8.03821e-05	0.000348371	UP		similar to uniprot|P31381 Saccharomyces cerevisiae YAL022c FUN26 intracellular membrane protein involved in nucleoside transport	YAL022C	FUN26	Nucleoside transporter with broad nucleoside selectivity; localized to intracellular membranes		Nucleoside transporter	orf19.4174
YALI0E26917g	2.31573	1.21146	1.42395e-06	8.89511e-06	UP		no similarity, hypothetical start
YALI0F12177g	2.31276	1.20961	0.000134038	0.000545862	UP		weakly similar to uniprot|Q08227 Saccharomyces cerevisiae YOL065c and KLLA0F24772g Kluyveromyces lactis	YOL065C	INP54	Phosphatidylinositol 4,5-bisphosphate 5-phosphatase with a role in secretion, localizes to the endoplasmic reticulum via the C-terminal tail; lacks the Sac1 domain and proline-rich region found in the other 3 INP proteins		Endonuclease/Exonuclease/phosphatase family	orf19.3180
YALI0B15818g	2.31174	1.20898	2.98349e-06	1.75339e-05	UP		some similarities with uniprot|Q05958 Saccharomyces cerevisiae YDR213W Hypothetical 100.3 kDa protein YD8142	YDR213W	UPC2	Sterol regulatory element binding protein, induces transcription of sterol biosynthetic genes and of DAN/TIR gene products; Ecm22p homolog; relocates from intracellular membranes to perinuclear foci on sterol depletion		Fungal Zn(2)-Cys(6) binuclear cluster domain Fungal specific transcription factor domain	UPC2	Transcriptional regulator of ergosterol biosynthetic genes and sterol uptake; binds ERG2 promoter; has Zn(2)-Cys(6) binuclear cluster; induced upon ergosterol depletion, by azoles, anaerobicity; macrophage/pseudohyphal-repressed
YALI0A13673g	2.31127	1.20869	6.79377e-05	0.000300145	UP		highly similar to uniprot|Q6CGE4 Yarrowia lipolytica YALI0A20020g, start by similarity
YALI0B01430g	2.30918	1.20738	0.00916718	0.0227585	UP		no similarity, hypothetical start
YALI0E00242g	2.30701	1.20602	2.56217e-07	1.84552e-06	UP		similar to uniprot|P39726 Saccharomyces cerevisiae YAL044c GCV3 glycine decarboxylase subunit H	YAL044C	GCV3	H subunit of the mitochondrial glycine decarboxylase complex, required for the catabolism of glycine to 5,10-methylene-THF; also required for all protein lipoylation; expression is regulated by levels of 5,10-methylene-THF		Glycine cleavage H-protein	GCV3	protein level decreased in stationary phase cultures
YALI0D21769g	2.30314	1.2036	1.64246e-05	8.36772e-05	UP		some similarities with uniprot|Q04749 Saccharomyces cerevisiae YMR068w	YMR068W	AVO2	Component of a complex containing the Tor2p kinase and other proteins, which may have a role in regulation of cell growth		Ankyrin repeats (3 copies)	orf19.215
YALI0D12969g	2.3022	1.20302	4.38802e-05	0.000203186	UP		similar to uniprot|P43602 Saccharomyces cerevisiae YFR022w	YOR018W	ROD1	Membrane protein that binds the ubiquitin ligase Rsp5p via its 2 PY motifs; overexpression confers resistance to the GST substrate o-dinitrobenzene,zinc, and calcium; proposed to regulate the endocytosis of plasma membrane proteins		Arrestin (or S-antigen), N-terminal domain Arrestin (or S-antigen), C-terminal domain	ROD1	Protein not essential for viability; similar to S. cerevisiae Rod1p, which is a membrane protein with a role in drug tolerance; repressed by Rgt1p
YALI0E15147g	2.29827	1.20055	0.000718394	0.00243411	UP		no similarity, hypothetical start
YALI0F23683g	2.29502	1.19851	8.54344e-05	0.000366981	UP		weakly similar to uniprot|P38996 Saccharomyces cerevisiae YPL190c NAB3 polyadenylated RNA-binding protein	YPL190C	NAB3	Single stranded RNA binding protein; acidic ribonucleoprotein; required for termination of non-poly(A) transcripts and efficient splicing; interacts with Nrd1p		RNA recognition motif. (a.k.a. RRM, RBD, or RNP domain)	NAB3	flucytosine repressed
YALI0B18854g	2.29014	1.19544	9.08568e-07	5.87196e-06	UP		weakly similar to uniprot|Q03649 Saccharomyces cerevisiae YMR210w Putative acyltransferase	YMR210W		Putative acyltransferase with similarity to Eeb1p and Eht1p, has a minor role in medium-chain fatty acid ethyl ester biosynthesis; may be involved in lipid metabolism and detoxification		Alpha/beta hydrolase family	orf19.1890
YALI0D08602g	2.28905	1.19475	8.0903e-05	0.00035012	UP		some similarities with uniprot|Q08023 Saccharomyces cerevisiae YLR077w	YLR077W	FMP25	Putative protein of unknown function; the authentic, non-tagged protein is detected in highly purified mitochondria in high-throughput studies		Regulator of chromosome condensation (RCC1) repeat	orf19.2938	Protein not essential for viability
YALI0C09735g	2.28456	1.19192	7.43198e-07	4.85256e-06	UP		similar to uniprot|P40185 Saccharomyces cerevisiae YIL051C MMF1 protein mitochondrial precursor (Maintenance of mitochondrial function 1) (Isoleucine biosynthesis and maintenance of intact mitochondria 1)	YIL051C	MMF1	Mitochondrial protein involved in maintenance of the mitochondrial genome		Endoribonuclease L-PSP	MMD1	macrophage-downregulated protein abundance
YALI0A08063g	2.28215	1.19039	9.64292e-06	5.18286e-05	UP	VTS1	Protein VTS1	YOR359W	VTS1	Post-transcriptional gene regulator, flap-structured DNA-binding and RNA-binding protein; shows genetic interactions with Vti1p, a v-SNARE involved in cis-Golgi membrane traffic; stimulates Dna2p endonuclease activity; contains a SAM domain		SAM domain (Sterile alpha motif)	orf19.2973
YALI0A18788g	2.28063	1.18943	0.00011281	0.0004715	UP		weakly similar to uniprot|O59668 Schizosaccharomyces pombe Hypothetical zf-C3HC4 zinc finger protein	YDR255C	RMD5	Conserved protein that has an E3-like ubiquitin ligase activity necessary for polyubiquitination and degradation of the gluconeogenic enzyme fructose-1,6-bisphosphatase; also required for sporulation; has a degenerate RING finger domain		RING-type zinc-finger, LisH dimerisation motif CTLH/CRA C-terminal to LisH motif domain
YALI0E01958g	2.27762	1.18752	0.00011793	0.000489042	UP		no similarity, possibly noncoding, hypothetical start
YALI0D27060g	2.27626	1.18666	0.00216488	0.0064059	UP		weakly similar to uniprot|Q873C1Neurospora crassa Hypothetical protein B24N11.020, hypothetical start					WD domain, G-beta repeat	orf19.4325
YALI0D21010g	2.27552	1.18619	1.17315e-05	6.17995e-05	UP		weakly similar to uniprot|Q06137 Saccharomyces cerevisiae YLR345w similarity to PFK26P and other 6- phosphofructo-2-kinases	YLR345W		Similar to 6-phosphofructo-2-kinase/fructose-2,6-bisphosphatase enzymes responsible for the metabolism of fructoso-2,6-bisphosphate; mRNA expression is repressed by the Rfx1p-Tup1p-Ssn6p repressor complex; YLR345W is not an essential gene		Histidine phosphatase superfamily (branch 1) 6-phosphofructo-2-kinase	orf19.3689	decreased expression observed in an ssr1 homozygous null mutant
YALI0E32131g	2.2732	1.18473	2.12229e-05	0.000106165	UP	YOS9	Protein OS-9 homolog					Glucosidase II beta subunit-like protein
YALI0E23782g	2.27164	1.18373	0.000445456	0.00157923	UP		no similarity, hypothetical start					PQ loop repeat
YALI0E11451g	2.27084	1.18323	2.5902e-05	0.000126387	UP		no similarity, hypothetical start					Universal stress protein family
YALI0D00473g	2.26813	1.1815	0.000118021	0.0004891	UP		no similarity, hypothetical start
YALI0B15059g	2.26778	1.18128	1.51511e-07	1.13241e-06	UP	FAS1	Fatty acid synthase subunit beta (EC 2.3.1.86) [Includes: 3-hydroxyacyl-[acyl-carrier-protein] dehydratase (EC 4.2.1.59); Enoyl-[acyl-carrier-protein] reductase [NADH] (EC 1.3.1.9); [Acyl-carrier-protein] acetyltransferase (EC 2.3.1.38); [Acyl-carrier-protein] malonyltransferase (EC 2.3.1.39); S-acyl fatty acid synthase thioesterase (EC 3.1.2.14)]	YKL182W	FAS1	Beta subunit of fatty acid synthetase, which catalyzes the synthesis of long-chain saturated fatty acids; contains acetyltransacylase, dehydratase, enoyl reductase, malonyl transacylase, and palmitoyl transacylase activities		Metal-binding domain of MaoC dehydratase MaoC like domain Domain of unknown function (DUF1729) Acyl transferase domain	FAS1	Beta subunit of fatty-acid synthase; multifunctional enzyme; fluconazole-induced; amphotericin B, caspofungin repressed; macrophage/pseudohyphal-induced; fungal-specific (no human or murine homolog)
YALI0D12166g	2.2656	1.1799	1.88818e-05	9.4977e-05	UP		some similarities with uniprot|P30620 Saccharomyces cerevisiae YMR137c PSO2 DNA repair protein singleton	YMR137C	PSO2	Required for a post-incision step in the repair of DNA single and double-strand breaks that result from interstrand crosslinks produced by a variety of mono- and bi-functional psoralen derivatives; induced by UV-irradiation		DNA repair metallo-beta-lactamase Beta-lactamase superfamily domain	orf19.2926
YALI0F26191g	2.26178	1.17746	6.65263e-06	3.68155e-05	UP		similar to uniprot|P38067 Saccharomyces cerevisiae YBR006w UGA2 succinate semialdehyde dehydrogenase	YBR006W	UGA2	Succinate semialdehyde dehydrogenase involved in the utilization of gamma-aminobutyrate (GABA) as a nitrogen source; part of the 4-aminobutyrate and glutamate degradation pathways; localized to the cytoplasm		Aldehyde dehydrogenase family	UGA2	Protein not essential for viability; similar to S. cerevisiae Uga2p, which is succinate semialdehyde dehydrogenase with a role in glutamate catabolism; transcription regulated by Mig1p, Tup1p, Gcn4p
YALI0C00473g	2.25991	1.17627	6.33662e-05	0.000281712	UP		some similarities with uniprot|P38738 Saccharomyces cerevisiae YHL029c hypothetical protein, hypothetical start						orf19.6769
YALI0A02354g	2.25799	1.17504	5.54675e-05	0.000250274	UP		similar to uniprot|Q02201 Saccharomyces cerevisiae YKR003w	YHR001W	OSH7	Member of an oxysterol-binding protein family with seven members in S. cerevisiae; family members have overlapping, redundant functions in sterol metabolism and collectively perform a function essential for viability		Oxysterol-binding protein	OBPA	Similar to oxysterol binding protein; gene is located within the MTLa mating-type-like locus; Plc1p-regulated
YALI0C00209g	2.25753	1.17475	7.5482e-06	4.13038e-05	UP		similar to uniprot|P32784 Saccharomyces cerevisiae YBL011w SCT1 suppresses a choline-transport mutant	YBL011W	SCT1	Glycerol 3-phosphate/dihydroxyacetone phosphate dual substrate-specific sn-1 acyltransferase of the glycerolipid biosynthesis pathway, prefers 16-carbon fatty acids, similar to Gpt2p, gene is constitutively transcribed		Acyltransferase	SCT1	Putative glycerol-3-phosphate O-acyltransferase; fungal-specific (no human or murine homolog)
YALI0A04807g	2.25182	1.17109	0.000919588	0.00301628	UP		weakly similar to uniprot|Q04740 Saccharomyces cerevisiae YMR234w RNH1 ribonuclease H, start by similarity, frameshift
YALI0D06798g	2.2511	1.17063	9.88485e-06	5.29052e-05	UP		similar to uniprot|Q12375 Saccharomyces cerevisiae YOR130c ARG11 ornithine transport protein of mitochondria involved in arginine metabolism member of the mitochondrial carrier family (MCF)	YOR130C	ORT1	Ornithine transporter of the mitochondrial inner membrane, exports ornithine from mitochondria as part of arginine biosynthesis; human ortholog is associated with hyperammonaemia-hyperornithinaemia-homocitrullinuria (HHH) syndrome		Mitochondrial carrier protein	ARG11	Protein induced during the mating process
YALI0E34001g	2.24895	1.16925	0.00475869	0.0128921	UP		some similarities with uniprot|P38692 Saccharomyces cerevisiae YHR102w NRK1 ser/thr protein kinase that interacts with CDC31P P108.1.f6.1	YHR102W	KIC1	Protein kinase of the PAK/Ste20 kinase family, required for cell integrity possibly through regulating 1,6-beta-glucan levels in the wall; physically interacts with Cdc31p (centrin), which is a component of the spindle pole body		Protein kinase domain	KIC1	Member of the GCK-III subfamily of eukaryotic Ste20p kinases; in RAM cell wall integrity signaling network; role in cell separation, azole sensitivity; required for hyphal growth; constitutive expression is MTL, white-opaque independent
YALI0F11979g	2.24879	1.16915	1.07628e-05	5.71228e-05	UP		some similarities with KLLA0E06479g Kluyveromyces lactis	YOL067C	RTG1	Transcription factor (bHLH) involved in interorganelle communication between mitochondria, peroxisomes, and nucleus		Helix-loop-helix DNA-binding domain	orf19.4722
YALI0D01353g	2.24838	1.16889	0.000215151	0.000828398	UP		weakly similar to DEHA0B08833g Debaryomyces hansenii, hypothetical start					Fungal Zn(2)-Cys(6) binuclear cluster domain Fungal specific transcription factor domain	ZCF32	Predicted zinc-finger protein of unknown function; possibly an essential gene, disruptants not obtained by UAU1 method
YALI0E03740g	2.24627	1.16753	1.81738e-05	9.17063e-05	UP		weakly similar to uniprot|Q12489 Saccharomyces cerevisiae YDL012c, start by similarity
YALI0B04378g	2.24504	1.16674	3.79149e-05	0.000178822	UP		similar to uniprot|P38329 Saccharomyces cerevisiae YBR235W Hypothetical 124.0 kDa protein in PBP2-ABD1 intergenic region	YBR235W		Putative ion transporter, similar to mammalian electroneutral Na(+)-(K+)-C1- cotransporter family; YBR235W is not an essential gene		Amino acid permease	orf19.6832
YALI0D07986g	2.24423	1.16622	6.91264e-05	0.000303804	UP		O-acyltransferase	YNR019W	ARE2	Acyl-CoA:sterol acyltransferase, isozyme of Are1p; endoplasmic reticulum enzyme that contributes the major sterol esterification activity in the presence of oxygen	SIMILAR TO	MBOAT, membrane-bound O-acyltransferase family
YALI0B01408g	2.24184	1.16469	0.000364647	0.00131775	UP		similar to uniprot|P30574 Candida albicans Carboxypeptidase Y precursor (EC 3.4.16.5) (Carboxypeptidase YSCY)	YMR297W	PRC1	Vacuolar carboxypeptidase Y (proteinase C; CPY), broad-specificity C-terminal exopeptidase involved in non-specific protein degradation in the vacuole; member of the serine carboxypeptidase family	SIMILAR TO	Serine carboxypeptidase Carboxypeptidase Y pro-peptide
YALI0D10109g	2.2415	1.16446	1.52362e-05	7.85043e-05	UP		no similarity, hypothetical start
YALI0C22726g	2.24145	1.16444	8.03892e-05	0.000348371	UP		no similarity, hypothetical start					Fungal domain of unknown function (DUF1746)
YALI0B11616g	2.23327	1.15916	6.09763e-05	0.000272038	UP		some similarities with uniprot|P38875 Saccharomyces cerevisiae GPI16 YHR188c Transmembrane protein subunit of the glycosylphosphatidylinositol transamidase complex that adds GPIs to newly synthesized proteins, frameshift
YALI0F01859g	2.23301	1.15899	0.000143456	0.000577919	UP		some similarities with wi|NCU02569.1 Neurospora crassa NCU02569.1 hypothetical protein	YLR207W	HRD3	Resident protein of the ER membrane that plays a central role in ER-associated protein degradation (ERAD), forms HRD complex with Hrd1p and ERAD determinants that engages in lumen to cytosol communication and coordination of ERAD events		Tetratricopeptide repeat Sel1 repeat	orf19.1191
YALI0A06677g	2.23032	1.15725	0.00860328	0.0215438	UP		no similarity, hypothetical start
YALI0D16665g	2.22644	1.15474	0.00223806	0.00659175	UP		similar to uniprot|Q9C1W4 Schizosaccharomyces pombe UPF0057 family protein, possible stress response protein, start by similarity					Proteolipid membrane potential modulator	orf19.2959.1	Gene induced by hypoxia and ketoconazole
YALI0F08195g	2.22604	1.15448	2.78472e-06	1.64724e-05	UP		similar to uniprot|P34227 Saccharomyces cerevisiae YBL064c	YBL064C	PRX1	Mitochondrial peroxiredoxin (1-Cys Prx) with thioredoxin peroxidase activity, has a role in reduction of hydroperoxides; reactivation requires Trr2p and glutathione; induced during respiratory growth and oxidative stress; phosphorylated		C-terminal domain of 1-Cys peroxiredoxin AhpC/TSA family
YALI0A05137g	2.22604	1.15448	4.239e-06	2.42398e-05	UP	COA3	Cytochrome c oxidase assembly protein 3, mitochondrial	YJL062W-A	RRG10	Putative protein of unknown function, proposed to be involved in the expression of mitochondrial proteins; the authentic, non-tagged protein is detected in highly purified mitochondria in high-throughput studies			orf19.6563.1
YALI0E02420g	2.22518	1.15393	4.09438e-06	2.34974e-05	UP		weakly similar to uniprot|P40557 Saccharomyces cerevisiae YIL005w related to protein disulfide isomerases	YIL005W	EPS1	ER protein with chaperone and co-chaperone activity, involved in retention of resident ER proteins; has a role in recognizing proteins targeted for ER-associated degradation (ERAD), member of the protein disulfide isomerase family		Thioredoxin-like domain Thioredoxin	orf19.1392	Predicted protein disulfide isomerase
YALI0E19250g	2.22461	1.15355	0.00155146	0.00478934	UP		no similarity, hypothetical start
YALI0E10593g	2.2218	1.15173	0.000442451	0.00157033	UP		weakly similar to CAGL0D00924g Candida glabrata, hypothetical start
YALI0B22682g	2.21859	1.14965	7.57423e-06	4.14105e-05	UP		similar to uniprot|Q06708 Saccharomyces cerevisiae YLR386w VAC14 Activator of Fab1p	YLR386W	VAC14	Protein involved in regulated synthesis of PtdIns(3,5)P(2), in control of trafficking of some proteins to the vacuole lumen via the MVB, and in maintenance of vacuole size and acidity; interacts with Fig4p; activator of Fab1p		Vacuolar protein 14 C-terminal Fig4p binding Vacuolar 14 Fab1-binding region
YALI0B05918g	2.2174	1.14887	1.33785e-05	6.97242e-05	UP		similar to uniprot|P38705 Saccharomyces cerevisiae Putative seryl-tRNA synthetase YHR011W (EC 6.1.1.11)	YHR011W	DIA4	Probable mitochondrial seryl-tRNA synthetase, mutant displays increased invasive and pseudohyphal growth		tRNA synthetase class II core domain (G, H, P, S and T) Seryl-tRNA synthetase N-terminal domain	orf19.1201
YALI0C03520g	2.21481	1.14718	6.29727e-05	0.000280158	UP		similar to uniprot|Q9UT85 Schizosaccharomyces pombe WD repeat protein	YCL039W	GID7	Protein of unknown function, involved in proteasome-dependent catabolite inactivation of fructose-1,6-bisphosphatase; contains six WD40 repeats; computational analysis suggests that Gid7p and Moh1p have similar functions		WD domain, G-beta repeat
YALI0F18590g	2.21304	1.14603	2.08206e-06	1.26456e-05	UP		similar to uniprot|P14065 Saccharomyces cerevisiae YOR120w GCY1 galactose-induced protein of aldo/keto reductase or uniprot|Q12458 Saccharomyces cerevisiae YDR368w YPR1 strong similarity to members of the aldo/keto reductase family	YOR120W	GCY1	Putative NADP(+) coupled glycerol dehydrogenase, proposed to be involved in an alternative pathway for glycerol catabolism; member of the aldo-keto reductase (AKR) family	SIMILAR TO	Aldo/keto reductase family
YALI0C00891g	2.20917	1.1435	0.00243093	0.00710709	UP		similar to uniprot|P25333 Saccharomyces cerevisiae YCR008w SAT4 serine/threonine-specific protein kinase	YCR008W	SAT4	Ser/Thr protein kinase involved in salt tolerance; funtions in regulation of Trk1p-Trk2p potassium transporter; partially redundant with Hal5p; has similarity to Npr1p		Protein kinase domain
YALI0A10230g	2.2069	1.14202	2.62171e-05	0.00012767	UP		similar to uniprot|P22211 Saccharomyces cerevisiae YNL183c NPR1 ser/thr protein kinase	YNL183C	NPR1	Protein kinase that stabilizes several plasma membrane amino acid transporters by antagonizing their ubiquitin-mediated degradation	SIMILAR TO	Protein kinase domain	NPR1	induced in core stress response
YALI0D16335g	2.20499	1.14077	1.29759e-05	6.78484e-05	UP		Ubiquitin carboxyl-terminal hydrolase (EC 3.4.19.12)	YMR304W	UBP15	Ubiquitin-specific protease that may play a role in ubiquitin precursor processing		Ubiquitin-specific protease 7 Ubiquitin carboxyl-terminal hydrolase MATH domain	orf19.1777
YALI0E18942g	2.20464	1.14054	0.000257661	0.000974358	UP		some similarities with uniprot|P20048 Saccharomyces cerevisiae YMR013c SEC59 dolichol kinase	YMR013C	SEC59	Dolichol kinase, catalyzes the terminal step in dolichyl monophosphate (Dol-P) biosynthesis; required for viability and for normal rates of lipid intermediate synthesis and protein N-glycosylation			orf19.261
YALI0D09207g	2.2043	1.14032	4.28937e-05	0.000199344	UP		weakly similar to KLLA0F01342g Kluyveromyces lactis IPF 1872.1, start by similarity
YALI0F05742g	2.20376	1.13997	0.00323538	0.00915154	UP		weakly similar to uniprot|Q9P7S9 Schizosaccharomyces pombe SPAC23G3.04., hypothetical start					INO80 complex subunit Ies4
YALI0E09306g	2.20314	1.13956	8.37335e-05	0.000360895	UP		weakly similar to uniprot|P50113 Saccharomyces cerevisiae YGL154c LYS5 L-aminoadipate-semialdehyde dehydrogenase small subunit	YGL154C	LYS5	Phosphopantetheinyl transferase involved in lysine biosynthesis; converts inactive apo-form of Lys2p (alpha-aminoadipate reductase) into catalytically active holo-form by posttranslational addition of phosphopantetheine		4'-phosphopantetheinyl transferase superfamily
YALI0A00418g	2.20297	1.13945	0.000855725	0.00283669	UP		weakly similar to uniprot|Q08777 Saccharomyces cerevisiae YOR306c similarity to human X-linked PEST- containing transporter	YOR306C	MCH5	Plasma membrane riboflavin transporter; facilitates the uptake of vitamin B2; required for FAD-dependent processes; sequence similarity to mammalian monocarboxylate permeases, however mutants are not deficient in monocarboxylate transport	SIMILAR TO	Major Facilitator Superfamily
YALI0D11671g	2.20107	1.13821	2.96765e-06	1.74569e-05	UP		similar to uniprot|Q9USY1 Schizosaccharomyces pombe carbohydrate kinase
YALI0F11517g	2.19847	1.1365	0.000387677	0.00139224	UP		no similarity, hypothetical start					Putative adipose-regulatory protein (Seipin)
YALI0D26389g	2.1968	1.1354	0.0166044	0.0382895	UP		similar to uniprot|P79058 Schizosaccharomyces pombe Hypothetical 15.4 kDa protein C10F6.16 in chromosome I	YNL157W		Putative protein of unknown function; green fluorescent protein (GFP)-fusion protein localizes to the cytoplasm and nucleus		cAMP-regulated phosphoprotein/endosulfine conserved region	orf19.285
YALI0C21340g	2.19595	1.13484	0.00777137	0.0196856	UP		weakly similar to uniprot|P39928 Saccharomyces cerevisiae YIL147c SLN1 two-component signal transducer	YIL147C	SLN1	Histidine kinase osmosensor that regulates a MAP kinase cascade; transmembrane protein with an intracellular kinase domain that signals to Ypd1p and Ssk1p, thereby forming a phosphorelay system similar to bacterial two-component regulators	SIMILAR TO	Response regulator receiver domain His Kinase A (phospho-acceptor) domain
YALI0B05764g	2.18938	1.13052	0.00412344	0.0113798	UP		weakly similar to uniprot|P38758 Saccharomyces cerevisiae YHR009C Hypothetical 57.0 kDa protein in SOD2- RPL27A intergenic region	YHR009C		Putative protein of unknown function; not an essential gene		FAD dependent oxidoreductase	orf19.2333
YALI0E09801g	2.18921	1.13041	0.000566028	0.00196073	UP		similar to DEHA0C16368g Debaryomyces hansenii	YIR036C	IRC24	Putative benzil reductase;(GFP)-fusion protein localizes to the cytoplasm and is induced by the DNA-damaging agent MMS; sequence similarity with short-chain dehydrogenase/reductases; null mutant has increased spontaneous Rad52p foci	SIMILAR TO	short chain dehydrogenase
YALI0A02310g	2.18871	1.13008	8.18546e-07	5.32265e-06	UP		highly similar to uniprot|P32861 Saccharomyces cerevisiae YKL035w UGP1 UTP--glucose-1-phosphate uridylyltransferase	YKL035W	UGP1	UDP-glucose pyrophosphorylase (UGPase), catalyses the reversible formation of UDP-Glc from glucose 1-phosphate and UTP, involved in a wide variety of metabolic pathways, expression modulated by Pho85p through Pho4p		UTP--glucose-1-phosphate uridylyltransferase
YALI0D02255g	2.18724	1.12911	5.18045e-06	2.92806e-05	UP		no similarity, hypothetical start					GDSL-like Lipase/Acylhydrolase
YALI0E34243g	2.18694	1.12891	7.10161e-05	0.000311363	UP		similar to uniprot|O59806 Schizosaccharomyces pombe Hypothetical 28.3 kDa protein, hypothetical start					Acetyltransferase (GNAT) family	orf19.5514	expression upregulated during growth in the mouse cecum
YALI0A04697g	2.18639	1.12855	2.72833e-05	0.000132274	UP		similar to uniprot|O42626 Neurospora crassa Serine/threonine-protein kinase nrc-2 (Nonrepressible conidiation protein 2)	YNR047W	FPK1	Ser/Thr protein kinase that regulates the putative phospholipid translocases Lem3p-Dnf1p/Dnf2p; phosphorylates and inhibits upstream inhibitory kinase, Ypk1p; localizes to the cytoplasm, early endosome/TGN compartments, and plasma membrane		Protein kinase domain	orf19.223	increased expression in response to prostaglandins; possibly an essential gene, disruptants not obtained by UAU1 method
YALI0C24101g	2.18637	1.12853	2.20225e-06	1.32867e-05	UP		Pyruvate carboxylase (EC 6.4.1.1)	YBR218C	PYC2	Pyruvate carboxylase isoform, cytoplasmic enzyme that converts pyruvate to oxaloacetate; highly similar to isoform Pyc1p but differentially regulated; mutations in the human homolog are associated with lactic acidosis		HMGL-like Conserved carboxylase domain Carbamoyl-phosphate synthase L chain, N-terminal domain Carbamoyl-phosphate synthase L chain, ATP binding domain Biotin-requiring enzyme Biotin carboxylase C-terminal domain	PYC2	Putative pyruvate carboxylase, binds to biotin cofactor; up-regulated in mutant lacking the Ssk1p response regulator protein, upon benomyl treatment, or in an azole-resistant strain overexpressing MDR1
YALI0E30085g	2.18284	1.1262	3.76417e-05	0.000177852	UP	FYV10	Protein FYV10	YIL097W	FYV10	Protein of unknown function, required for survival upon exposure to K1 killer toxin; involved in proteasome-dependent catabolite inactivation of FBPase; contains CTLH domain; plays role in anti-apoptosis		CTLH/CRA C-terminal to LisH motif domain
YALI0A13585g	2.1811	1.12506	6.20422e-05	0.000276212	UP		weakly similar to uniprot|P38069 Saccharomyces cerevisiae YBR015c TTP1(MNN2)	YBR015C	MNN2	Alpha-1,2-mannosyltransferase, responsible for addition of the first alpha-1,2-linked mannose to form the branches on the mannan backbone of oligosaccharides, localizes to an early Golgi compartment		Mannosyltransferase putative
YALI0E24453g	2.17979	1.12419	0.000124808	0.000514538	UP	ATG3	Autophagy-related protein 3 (Autophagy-related E2-like conjugation enzyme ATG3)	YNR007C	ATG3	E2-like enzyme involved in autophagy and the cytoplasm-to-vacuole targeting (Cvt) pathway; plays a role in formation of Atg8p-phosphatidylethanolamine conjugates, which are involved in membrane dynamics during autophagy and Cvt		Autophagocytosis associated protein, active-site domain Autophagocytosis associated protein C-terminal Autophagocytosis associated protein (Atg3), N-terminal domain	orf19.6020
YALI0B07183g	2.17816	1.12311	0.00576985	0.0152415	UP		similar to uniprot|P07274 Saccharomyces cerevisiae YOR122c PFY1 profilin, start by similarity					Profilin	PFY1	Profilin, functional homolog of S. cerevisiae Pfy1p; hyphal-induced; macrophage/pseudohyphal-induced; regulated by Nrg1p, Tup1p; gene lacks intron (unlike S. cerevisiae PFY1); complements growth of S. cerevisiae srv2 mutant; nonessential
YALI0D03641g	2.17405	1.12038	6.91964e-05	0.000303804	UP		no similarity, hypothetical start
YALI0B04983g	2.17162	1.11877	0.000180239	0.000706362	UP		some similarities with gb|EHK24780.1 Trichoderma virens TRIVIDRAFT_30254 putative cell cycle inhibitor
YALI0D20042g	2.16911	1.1171	2.09404e-05	0.000104834	UP	EFR3	Protein EFR3	YMR212C	EFR3	Non-essential protein of unknown function; exhibits synthetic lethal genetic interactions with PHO85; the authentic, non-tagged protein is detected in highly purified mitochondria in high-throughput studies and is phosphorylated			orf19.4798
YALI0D18359g	2.1691	1.1171	1.89919e-05	9.53798e-05	UP		weakly similar to uniprot|Q8CE47 Mus musculus Hypothetical protein, start by similarity					Major Facilitator Superfamily
YALI0A14608g	2.16819	1.11649	2.50576e-05	0.000122643	UP		weakly similar to CA4833|IPF1216 Candida albicans IPF1216 unknown function, hypothetical start					Protein of unknown function (DUF2422) Protein of unknown function (DUF2421) Fusaric acid resistance protein-like
YALI0A03971g	2.16779	1.11622	0.000307494	0.00113313	UP		similar to uniprot|Q6CHW5 Yarrowia lipolytica YALI0A04059g, start by similarity
YALI0D07854g	2.16675	1.11553	1.67011e-06	1.02771e-05	UP		no similarity, hypothetical start					Zinc finger, ZZ type
YALI0D01199g	2.1658	1.1149	6.06235e-06	3.38437e-05	UP		similar to uniprot|Q06138 Mus musculus MO25 hypothetical calcium-binding protein	YKL189W	HYM1	Component of the RAM signaling network that is involved in regulation of Ace2p activity and cellular morphogenesis, interacts with Kic1p and Sog2p, localizes to sites of polarized growth during budding and during the mating response		Mo25-like	HYM1	Mo25 family domain protein of RAM cell wall integrity signaling network; role in cell separation, azole sensitivity; required for hyphal growth
YALI0D01419g	2.16465	1.11413	0.0145004	0.0340433	UP		no similarity, hypothetical start					Fungal Zn(2)-Cys(6) binuclear cluster domain
YALI0E25069g	2.15933	1.11058	0.00187332	0.00562972	UP		similar to uniprot|P39109 Saccharomyces cerevisiae YDR135c YCF1 Metal resistance protein	YDR135C	YCF1	Vacuolar glutathione S-conjugate transporter of the ATP-binding cassette family, has a role in detoxifying metals such as cadmium, mercury, and arsenite; also transports unconjugated bilirubin; similar to human cystic fibrosis protein CFTR		ABC transporter transmembrane region ABC transporter	YCF1	Putative glutathione S-conjugate transporter; MRP/CFTR-subfamily, ABC transporter family; human neutrophil-induced; oxidative stress-induced via Cap1p; possible association with multidrug resistance; possibly an essential gene (UAU1 method)
YALI0E16951g	2.15871	1.11017	5.14931e-05	0.000234002	UP		no similarity, hypothetical start					Uncharacterised conserved protein
YALI0A19734g	2.15801	1.1097	8.93464e-05	0.000382234	UP		no similarity, start identified by cDNA
YALI0D05247g	2.15455	1.10739	0.000902151	0.00296962	UP		no similarity, hypothetical start
YALI0E10791g	2.15438	1.10727	0.00093637	0.00306232	UP		no similarity, hypothetical start					HORMA domain
YALI0C11880g	2.1542	1.10715	3.38331e-05	0.000161005	UP		Ribulose-phosphate 3-epimerase (EC 5.1.3.1)	YJL121C	RPE1	D-ribulose-5-phosphate 3-epimerase, catalyzes a reaction in the non-oxidative part of the pentose-phosphate pathway; mutants are sensitive to oxidative stress		Ribulose-phosphate 3 epimerase family	orf19.7108	protein detected by mass spec in stationary phase cultures
YALI0F22319g	2.15403	1.10704	0.00147177	0.00456106	UP		similar to uniprot|Q6CAX0 Yarrowia lipolytica YALI0C23705g, start by similarity					Ankyrin repeat Acetyltransferase (GNAT) family
YALI0D00220g	2.1522	1.10581	8.23412e-06	4.47871e-05	UP		similar to uniprot|P53193 Saccharomyces cerevisiae YGL018c JAC1 molecular chaperone	YGL018C	JAC1	Specialized J-protein that functions with Hsp70 in Fe-S cluster biogenesis in mitochondria, involved in iron metabolism; contains a J domain typical to J-type chaperones; localizes to the mitochondrial matrix		HSCB C-terminal oligomerisation domain DnaJ domain	orf19.2104
YALI0F26301g	2.15103	1.10503	0.000151733	0.000607794	UP		some similarities with uniprot|P38356 Saccharomyces cerevisiae YBR290w BSD2 metal homeostasis protein	YBR290W	BSD2	Heavy metal ion homeostasis protein, facilitates trafficking of Smf1p and Smf2p metal transporters to the vacuole where they are degraded, controls metal ion transport, prevents metal hyperaccumulation, functions in copper detoxification		Protein of unknown function (DUF2370)	orf19.5869
YALI0E12221g	2.14955	1.10404	1.41996e-05	7.34607e-05	UP		similar to uniprot|P32802 Saccharomyces cerevisiae YLR083c EMP70 endosomal protein	YLR083C	EMP70	Protein with a role in cellular adhesion and filamentous growth; similar to Tmn2p and Tmn3p; member of Transmembrane Nine family of proteins with 9 transmembrane segments; 24kDa cleavage product found in endosome-enriched membrane fractions		Endomembrane protein 70	orf19.2746
YALI0F22165g	2.14936	1.10391	0.000891914	0.00294205	UP		weakly similar to DEHA0E14355g Debaryomyces hansenii IPF 11787.1 and CAGL0J08349g Candida glabrata IPF 6716.1	YLR187W	SKG3	Protein of unknown function; green fluorescent protein (GFP)-fusion protein localizes to the cell periphery, cytoplasm, bud, and bud neck; potential Cdc28p substrate; similar to Caf120p and Skg4p			orf19.5274
YALI0B21912g	2.14723	1.10248	0.00217288	0.00642657	UP		no similarity, hypothetical start					Protein of unknown function (DUF1681)
YALI0F13651g	2.14595	1.10162	0.0158417	0.0367966	UP		weakly similar to uniprot|Q9H841 Homo sapiens Hypothetical protein FLJ13955, hypothetical start					Magnesium transporter NIPA
YALI0F10010g	2.13691	1.09553	0.000109559	0.000459425	UP		weakly similar to uniprot|P36165 Saccharomyces cerevisiae YKR089c and DEHA0E06127g Debaryomyces hansenii	YKR089C	TGL4	Triacylglycerol lipase involved in triacylglycerol mobilization and degradation; found in lipid particles; phosphorylated and activated by Cdc28p; required with Tgl3p for timely bud formation		Patatin-like phospholipase Domain of unknown function (DUF3336)	orf19.5426	Putative patatin-like phospholipase; macrophage-regulated gene; fungal-specific (no human or murine homolog)
YALI0C00110g	2.13602	1.09493	0.000379805	0.00136631	UP		weakly similar to uniprot|Q9P731 Neurospora crassa, putative serum paraoxonase/arylesterase family protein, hypothetical start
YALI0C06325g	2.13592	1.09486	0.000439412	0.00156268	UP		weakly similar to uniprot|Q8Y6B4 Listeria monocytogenes Hypothetical protein, hypothetical start					HD domain
YALI0F22231g	2.13457	1.09395	2.23759e-05	0.000111232	UP		similar to uniprot|P25693 Saccharomyces cerevisiae YDL127W G1/S-specific cyclin PCL2	YNL289W	PCL1	Cyclin, interacts with cyclin-dependent kinase Pho85p; member of the Pcl1,2-like subfamily, involved in the regulation of polarized growth and morphogenesis and progression through the cell cycle; localizes to sites of polarized cell growth		Cyclin, N-terminal domain	PCL1	Cyclin homolog; expression induced upon filamentous growth; transcription is induced in response to alpha pheromone in SpiderM medium
YALI0D12925g	2.13363	1.09331	0.000315426	0.00115796	UP		some similarities with uniprot|P38888 Saccharomyces cerevisiae YHR204w HTM1	YHR204W	MNL1	Alpha mannosidase-like protein of the endoplasmic reticulum required for degradation of glycoproteins but not for processing of N-linked oligosaccharides		Glycosyl hydrolase family 47	orf19.834
YALI0B15268g	2.13305	1.09292	0.000116557	0.000484612	UP		similar to uniprot|Q07551 Saccharomyces cerevisiae Chromosome IV reading frame ORF YDL124W similarity to aldose reductases P6.5.f6.1	YDL124W		NADPH-dependent alpha-keto amide reductase; reduces aromatic alpha-keto amides, aliphatic alpha-keto esters, and aromatic alpha-keto esters; member of the aldo-keto reductase (AKR) family		Aldo/keto reductase family	orf19.1340	protein level decreased in stationary phase cultures
YALI0B15510g	2.13039	1.09111	9.65362e-06	5.18423e-05	UP		similar to uniprot|P32623 Saccharomyces cerevisiae YEL040w UTR2 cell wall protein P3.82.f3.1	YEL040W	UTR2	Chitin transglycosylase that functions in the transfer of chitin to beta(1-6) and beta(1-3) glucans in the cell wall; similar to and functionally redundant with Crh1; glycosylphosphatidylinositol (GPI)-anchored protein localized to bud neck		Glycosyl hydrolases family 16	UTR2	GPI anchored cell wall putative glycosidase; role in adhesion; required for hyphal growth on Spider (not serum) medium; chitin-binding, glycosyl hydrolase domains; induced during cell wall regeneration; mRNA detected in yeast-form cells
YALI0E22649g	2.12726	1.089	3.16096e-06	1.85254e-05	UP		Glucose-6-phosphate 1-dehydrogenase (EC 1.1.1.49)	YNL241C	ZWF1	Glucose-6-phosphate dehydrogenase (G6PD), catalyzes the first step of the pentose phosphate pathway; involved in adapting to oxidatve stress; homolog of the human G6PD which is deficient in patients with hemolytic anemia		Glucose-6-phosphate dehydrogenase, NAD binding domain Glucose-6-phosphate dehydrogenase, C-terminal domain	ZWF1	Putative glucose-6-phosphate dehydrogenase; antigenic in murine infection; activity induced by O2 or oxidizing agents H2O2 or menadione; caspofungin repressed; macrophage induced; induced in core stress response; regulated by Gcn2p, Gcn4p
YALI0C01694g	2.12435	1.08702	0.0029571	0.00845094	UP		similar to DEHA0B02497g Debaryomyces hansenii, hypothetical start					Protein of unknown function (DUF2422) Protein of unknown function (DUF2421) Fusaric acid resistance protein-like
YALI0C04114g	2.12317	1.08622	1.73363e-05	8.77587e-05	UP		weakly similar to uniprot|P53281 Saccharomyces cerevisiae YGR136w	YGR136W	LSB1	Protein containing an N-terminal SH3 domain; binds Las17p, which is a homolog of human Wiskott-Aldrich Syndrome protein involved in actin patch assembly and actin polymerization	SIMILAR TO	SH3 domain	PIN3	Putative SH3-domain-containing protein
YALI0B14443g	2.12083	1.08463	0.000896565	0.00295429	UP		some similarities with uniprot|Q9C2J9 Neurospora crassa 3H10.130 Related to regulator protein rum1	YJR119C	JHD2	JmjC domain family histone demethylase specific for H3-K4 (histone H3 Lys4); removes methyl groups specifically added by Set1p methyltransferase; protein levels regulated by Not4p (E3 ubiquitin ligase) polyubiquitin-mediated degradation		jmjN domain JmjC domain, hydroxylase C5HC2 zinc finger ARID/BRIGHT DNA binding domain	orf19.5651
YALI0A01001g	2.1205	1.08441	1.01837e-05	5.43215e-05	UP		weakly similar to uniprot|P32341 Saccharomyces cerevisiae YKL119c VPH2 H+-ATPase assembly protein	YKL119C	VPH2	Integral membrane protein required for vacuolar H+-ATPase (V-ATPase) function, although not an actual component of the V-ATPase complex; functions in the assembly of the V-ATPase; localized to the endoplasmic reticulum (ER)		Endoplasmic reticulum-based factor for assembly of V-ATPase	VPH2
YALI0D20856g	2.12023	1.08422	4.74822e-05	0.000217174	UP		similar to uniprot|P43569 Saccharomyces cerevisiae YFL028c CAF16 ATP-binding cassette transporter family member singleton	YFL028C	CAF16	Part of evolutionarily-conserved CCR4-NOT regulatory complex; contains single ABC-type ATPase domain but no transmembrane domain; interacts with several subunits of Mediator			CAF16	ABC family protein, predicted not to be a transporter; caspofungin repressed
YALI0F30371g	2.1182	1.08284	0.0102913	0.0252144	UP		weakly similar to uniprot|Q8WZY9 Neurospora crassa conserved hypothetical protein, hypothetical start					HbrB-like
YALI0B03102g	2.11659	1.08174	8.22825e-05	0.000355123	UP		no similarity, hypothetical start
YALI0E28336g	2.11546	1.08097	0.00122753	0.00388372	UP		weakly similar to uniprot|Q08294 Saccharomyces cerevisiae YOL155c, hypothetical start
YALI0D19558g	2.11443	1.08027	2.36842e-05	0.000117094	UP		similar to uniprot|P32901 Saccharomyces cerevisiae YKR093W Peptide transporter PTR2 (Peptide permease PTR2)	YKR093W	PTR2	Integral membrane peptide transporter, mediates transport of di- and tri-peptides; conserved protein that contains 12 transmembrane domains; PTR2 expression is regulated by the N-end rule pathway via repression by Cup9p		POT family	PTR2	Putative oligopeptide transporter; regulated by Stp2p and Stp3p; transcriptionally induced upon phagocytosis by macrophage; downregulated by Rim101p at pH 8
YALI0C12430g	2.111	1.07792	0.00674058	0.017572	UP		some similarities with uniprot|Q12232 Saccharomyces cerevisiae YOR154w	YOR154W	SLP1	Integral membrane protein of unknown function; member of the SUN-like family of proteins; genetic interactions suggest a role in folding of ER membrane proteins		Sad1 / UNC-like C-terminal	orf19.4738
YALI0B19096g	2.10461	1.07356	0.00731669	0.0187658	UP		weakly similar to CA2780|IPF3831 Candida albicans unknown function, hypothetical start
YALI0D04246g	2.10447	1.07346	0.000116093	0.000483315	UP		similar to uniprot|P34230 Saccharomyces cerevisiae YKL188c PXA2 ABC transporter peroxisomal	YKL188C	PXA2	Subunit of a heterodimeric peroxisomal ATP-binding cassette transporter complex (Pxa1p-Pxa2p), required for import of long-chain fatty acids into peroxisomes; similarity to human adrenoleukodystrophy transporter and ALD-related proteins		ABC transporter transmembrane region 2 ABC transporter	PXA2	Putative peroxisomal, half-size adrenoleukodystrophy protein (ALD or ALDp) subfamily ABC transporter; Gcn4p-regulated
YALI0B13530g	2.10376	1.07297	6.02268e-05	0.000269111	UP		similar to uniprot|P36091 Saccharomyces cerevisiae YKL046c or uniprot|Q05031 Saccharomyces cerevisiae YMR238w DFG5 required for filamentous growth cell polarity and cellular elongation	YKL046C	DCW1	Putative mannosidase, GPI-anchored membrane protein required for cell wall biosynthesis in bud formation;homologous to Dfg5p	SIMILAR TO	Glycosyl hydrolase family 76
YALI0E19635g	2.10296	1.07242	0.0189915	0.0429522	UP		no similarity, hypothetical start					Inositolphosphorylceramide synthase subunit Kei1
YALI0F10659g	2.10106	1.07112	0.000110556	0.000462995	UP		similar to uniprot|P32266 Saccharomyces cerevisiae YOR211c MGM1 dynamin-like protein and DEHA0G20273g Debaryomyces hansenii	YOR211C	MGM1	Mitochondrial GTPase related to dynamin, present in a complex containing Ugo1p and Fzo1p; required for normal morphology of cristae and for stability of Tim11p; homolog of human OPA1 involved in autosomal dominant optic atrophy		Dynamin family Dynamin central region	orf19.2690
YALI0F14905g	2.09876	1.06954	0.000149702	0.000600037	UP		similar to uniprot|Q7SBB4 Neurospora crassa NCU06209.1 hypothetical protein, hypothetical start					Fungal protein of unknown function (DUF2015)	orf19.7078
YALI0F22957g	2.09827	1.0692	0.000309582	0.00113884	UP		no similarity, hypothetical start
YALI0B23364g	2.09814	1.06911	2.71047e-05	0.000131548	UP		weakly similar to uniprot|P53259 Saccharomyces cerevisiae YGR101w weak similarity to B.subtilis YqgP singleton	YGR101W	PCP1	Mitochondrial serine protease required for the processing of various mitochondrial proteins and maintenance of mitochondrial DNA and morphology; belongs to the rhomboid-GlpG superfamily of intramembrane peptidases		Rhomboid family	orf19.1643
YALI0D12496g	2.09765	1.06877	0.0136917	0.03236	UP		weakly similar to DEHA0D16797g Debaryomyces hansenii	YDL133W		Putative protein of unknown function			orf19.1675
YALI0E34650g	2.09566	1.0674	8.86631e-05	0.000379567	UP		weakly similar to uniprot|O94400 Schizosaccharomyces pombe Putative PHD-type zinc finger, hypothetical start					Ring finger domain
YALI0C09801g	2.09436	1.06651	0.000153406	0.00061295	UP	COX16	Cytochrome c oxidase assembly protein COX16, mitochondrial	YJL003W	COX16	Mitochondrial inner membrane protein, required for assembly of cytochrome c oxidase		Cytochrome c oxidase assembly protein COX16
YALI0C06534g	2.09113	1.06429	0.00798561	0.0201961	UP		no similarity, hypothetical start
YALI0E32417g	2.09049	1.06384	0.00224956	0.00661977	UP		weakly similar to CA2723|IPF4805 Candida albicans IPF4805, hypothetical start
YALI0C02409g	2.08871	1.06261	0.000799416	0.00267722	UP		similar to uniprot|P39719 Saccharomyces cerevisiae YAL053W Hypothetical 87.5 kDa protein in ACS1-GCV3 intergenic region	YAL053W	FLC2	Putative FAD transporter; required for uptake of FAD into endoplasmic reticulum; involved in cell wall maintenance		Transient receptor potential (TRP) ion channel
YALI0F26455g	2.08397	1.05933	6.46505e-05	0.000286819	UP		weakly similar to uniprot|P47125 Saccharomyces cerevisiae YJR078w similarity to mammalian indoleamine 2 3- dioxygenase	YJR078W	BNA2	Putative tryptophan 2,3-dioxygenase or indoleamine 2,3-dioxygenase, required for the de novo biosynthesis of NAD from tryptophan via kynurenine; expresssion is upregulated upon telomere uncapping; regulated by Hst1p and Aft2p		Indoleamine 2,3-dioxygenase	orf19.583	Putative indoleamine 2,3-dioxygenase (IDO); IDO is the rate-limiting enzyme of tryptophan catabolism via kynurenine pathway; enzyme inhibition by 1-methyl-D,L-tryptophan causes increased hyphal growth; expressed in yeast cells and hyphae
YALI0E32065g	2.08063	1.05702	0.000985505	0.00319924	UP		similar to uniprot|P32352 Saccharomyces cerevisiae YMR202W ERG2 C-8 sterol isomerase (Delta-8--delta-7 sterol isomerase)	YMR202W	ERG2	C-8 sterol isomerase, catalyzes the isomerization of the delta-8 double bond to the delta-7 position at an intermediate step in ergosterol biosynthesis		ERG2 and Sigma1 receptor like protein	ERG2	C-8 sterol isomerase; enzyme of ergosterol biosynthesis pathway; converts fecosterol to episterol; mutant is hypersensitive to multiple drugs; ketoconazole-induced
YALI0D17028g	2.08027	1.05677	6.54058e-05	0.00028916	UP		similar to uniprot|Q12001 Saccharomyces cerevisiae YOR002w ALG6 glucosyltransferase	YOR002W	ALG6	Alpha 1,3 glucosyltransferase, involved in transfer of oligosaccharides from dolichyl pyrophosphate to asparagine residues of proteins during N-linked protein glycosylation; mutations in human ortholog are associated with disease		ALG6, ALG8 glycosyltransferase family
YALI0E21758g	2.0792	1.05603	5.08693e-05	0.000231831	UP		weakly similar to uniprot|Q8X0C0 Neurospora crassa NCU06821.1 probable cro1 protein	YOR035C	SHE4	Protein containing a UCS (UNC-45/CRO1/SHE4) domain, binds to myosin motor domains to regulate myosin function; involved in endocytosis, polarization of the actin cytoskeleton, and asymmetric mRNA localization		Myosin-binding striated muscle assembly central
YALI0E30921g	2.07771	1.05499	0.00113572	0.00362993	UP		weakly similar to uniprot|Q7SFY9 Neurospora crassa NCU03105.1 predicted protein (39797 - 38088), hypothetical start					UV radiation resistance protein and autophagy-related subunit 14
YALI0F07359g	2.07737	1.05476	0.00112276	0.00359702	UP		weakly similar to uniprot|Q03530 Saccharomyces cerevisiae YMR274c RCE1 modulator of RAS2P	YMR274C	RCE1	Type II CAAX prenyl protease involved in the proteolysis and maturation of Ras and the a-factor mating pheromone		CAAX protease self-immunity	RCE1	Protein induced during the mating process
YALI0E21439g	2.07712	1.05458	0.00637418	0.016699	UP		weakly similar to uniprot|Q12021 Saccharomyces cerevisiae YDR030c RAD28 protein involved in the same pathway as RAD26P has beta-transducin (WD-40) repeats	YDR030C	RAD28	Protein involved in DNA repair, related to the human CSA protein that is involved in transcription-coupled repair nucleotide excision repair		WD domain, G-beta repeat	orf19.268
YALI0D25872g	2.07504	1.05314	0.0215071	0.0479083	UP		similar to uniprot|P32867 Saccharomyces cerevisiae YPL232W SSO1 protein	YMR183C	SSO2	Plasma membrane t-SNARE involved in fusion of secretory vesicles at the plasma membrane; syntaxin homolog that is functionally redundant with Sso1p	SIMILAR TO	Syntaxin SNARE domain
YALI0E17831g	2.07344	1.05202	0.000216327	0.000831915	UP		similar to uniprot|Q06010 Saccharomyces cerevisiae YLR389c STE23 protease involved in a-factor processing	YLR389C	STE23	Metalloprotease involved, with homolog Axl1p, in N-terminal processing of pro-a-factor to the mature form; member of the insulin-degrading enzyme family	SIMILAR TO	Peptidase M16 inactive domain Insulinase (Peptidase family M16)
YALI0C11858g	2.0727	1.05151	0.00177472	0.00536896	UP		weakly similar to uniprot|Q6C3X9 Yarrowia lipolytica YALI0E31383g, start by similarity					Fungal Zn(2)-Cys(6) binuclear cluster domain Fungal specific transcription factor domain
YALI0B16126g	2.07079	1.05018	2.88861e-05	0.000139554	UP		similar to uniprot|P29703 Saccharomyces cerevisiae YKL019w RAM2 protein farnesyltransferase alpha subunit P2. 311.f2.1	YKL019W	RAM2	Alpha subunit of both the farnesyltransferase and type I geranylgeranyltransferase that catalyze prenylation of proteins containing a CAAX consensus motif; essential protein required for membrane localization of Ras proteins and a-factor		Protein prenyltransferase alpha subunit repeat	RAM2	Alpha subunit of heterodimeric protein geranylgeranyltransferase type I and farnesyltransferase; a-specific transcription; lovastatin and fluconazole regulated; GGTase I enzyme binds zinc, is Mg-dependent; Cdc42p is GGTase I substrate
YALI0A15059g	2.06996	1.0496	0.00177471	0.00536896	UP		weakly similar to uniprot|Q9UST8 Schizosaccharomyces pombe Ribonuclease H, hypothetical start					RNase H
YALI0E08580g	2.06935	1.04918	0.00105192	0.00339229	UP	PRM1	Plasma membrane fusion protein PRM1	YNL279W	PRM1	Pheromone-regulated multispanning membrane protein involved in membrane fusion during mating; predicted to have 5 transmembrane segments and a coiled coil domain; localizes to the shmoo tip; regulated by Ste12p			PRM1	Protein induced during the mating process
YALI0D05665g	2.06823	1.0484	4.33447e-05	0.000200853	UP		similar to uniprot|P40157 Saccharomyces cerevisiae YNL212w VID27	YNL212W	VID27	Cytoplasmic protein of unknown function; possibly involved in vacuolar protein degradation; not essential for proteasome-dependent degradation of fructose-1,6-bisphosphatase (FBPase); null mutants exhibit normal growth		VID27 cytoplasmic protein	VID27	Protein similar to S. cerevisiae Vid27p; transposon mutation affects filamentous growth; mutation confers hypersensitivity to toxic ergosterol analog; fungal-specific (no human or murine homolog)
YALI0F16489g	2.06704	1.04757	7.37504e-05	0.000321576	UP		similar to uniprot|P27614 Saccharomyces cerevisiae YJL172w CPS1 Gly-X carboxypeptidase YSCS precursor	YJL172W	CPS1	Vacuolar carboxypeptidase yscS; expression is induced under low-nitrogen conditions	SIMILAR TO	Peptidase family M20/M25/M40 Peptidase dimerisation domain
YALI0B01144g	2.06292	1.04469	0.0199713	0.0448014	UP		weakly similar to uniprot|Q05863 Saccharomyces cerevisiae YLR281c related to polypeptide chain release factors	YLR281C		Putative protein of unknown function; green fluorescent protein (GFP)-fusion protein localizes to mitochondria; YLR281C is not an essential gene		RF-1 domain	orf19.5488
YALI0F11693g	2.06214	1.04414	0.000390603	0.00140039	UP		some similarities with uniprot|Q9PTY5 Xenopus laevis RanBPM protein RANBPM gene, hypothetical start					SPRY domain LisH CTLH/CRA C-terminal to LisH motif domain
YALI0D25168g	2.05593	1.03979	5.82906e-05	0.000261526	UP		similar to uniprot|P06106 Saccharomyces cerevisiae YLR303w MET25 O-acetylhomoserine sulfhydrylase P5.26.f3.1	YLR303W	MET17	Methionine and cysteine synthase (O-acetyl homoserine-O-acetyl serine sulfhydrylase), required for sulfur amino acid synthesis		Cys/Met metabolism PLP-dependent enzyme	MET15	O-acetylhomoserine O-acetylserine sulfhydrylase; involved in sulfur amino acid biosynthesis; immunogenic; Hog1p, biofilm, possibly adherence-induced; brown colony color of homozygous mutant in Pb(2+) medium is visual selection marker
YALI0C16412g	2.05334	1.03797	0.000481849	0.00169783	UP		weakly similar to uniprot|P32912 Saccharomyces cerevisiae YGL212w VAM7 vacuolar morphogenesis protein, hypothetical start					SNARE domain PX domain
YALI0E27742g	2.05323	1.03789	4.15653e-05	0.000194022	UP		weakly similar to uniprot|P03069 Saccharomyces cerevisiae YEL009c GCN4 transcriptional activator of amino acid biosynthetic genes	YEL009C	GCN4	Basic leucine zipper (bZIP) transcriptional activator of amino acid biosynthetic genes in response to amino acid starvation; expression is tightly regulated at both the transcriptional and translational levels		bZIP transcription factor	GCN4	Transcriptional activator of general amino acid control response; required for Efg1p-dependent pseudohyphal filament induction by amino acid starvation but not by serum; upregulated in the presence of human whole blood or PMN cells
YALI0F29689g	2.05211	1.03711	0.000781522	0.00262421	UP	ATG12	Ubiquitin-like protein ATG12 (Autophagy-related protein 12)	YBR217W	ATG12	Conserved ubiquitin-like modifier involved in autophagy and the Cvt pathway; conjugated to Atg5p to form a complex involved in Atg8p lipidation; Atg12p-Atg5p also forms a complex with Atg16p that is required for autophagosome formation		Ubiquitin-like autophagy protein Apg12
YALI0D13156g	2.05135	1.03657	0.00218162	0.00644945	UP		weakly similar to uniprot|P38966 Saccharomyces cerevisiae YDR089w	YJL012C	VTC4	Vacuolar membrane polyphosphate polymerase; subunit of the vacuolar transporter chaperone (VTC) complex involved in synthesis and transfer of polyP to the vacuole; regulates membrane trafficking; role in non-autophagic vacuolar fusion	SIMILAR TO	VTC domain SPX domain
YALI0B23078g	2.05016	1.03574	0.000219486	0.000843043	UP		similar to uniprot|Q9HEF8 Neurospora crassa Related to membrane protein, start by similarity					Rhomboid family	RBD1	Rhomboid-like protein; similar to putative intramembrane serine proteases; involved in filamentous growth; Gcn4p-regulated; caspofungin repressed
YALI0F04268g	2.04849	1.03456	0.000117414	0.000487538	UP		some similarities to uniprot|P38845 Saccharomyces cerevisiae YHR146w Hypothetical 51.1 kDa protein in DCD1-MRPL6 intergenic region, start by similarity						orf19.7239
YALI0A18986g	2.04802	1.03423	3.14074e-05	0.000150362	UP		weakly similar to uniprot|P32857 Saccharomyces cerevisiae YKL039w PTM1 member of the major facilitator superfamily	YKL039W	PTM1	Protein of unknown function, copurifies with late Golgi vesicles containing the v-SNARE Tlg2p		Lung seven transmembrane receptor	orf19.1991
YALI0E16060g	2.04641	1.0331	0.00362986	0.0101365	UP		similar to uniprot|P39105 Saccharomyces cerevisiae YMR008c PLB1 phospholipase B (lysophospholipase)	YOL011W	PLB3	Phospholipase B (lysophospholipase) involved in phospholipid metabolism; hydrolyzes phosphatidylinositol and phosphatidylserine and displays transacylase activity in vitro		Lysophospholipase catalytic domain
YALI0B02332g	2.04622	1.03296	2.65042e-05	0.00012883	UP		similar to uniprot|Q9P6E3 Neurospora crassa conserved hypothetical protein	YMR196W		Putative protein of unknown function; green fluorescent protein (GFP)-fusion protein localizes to the cytoplasm; YMR196W is not an essential gene		Mannosyl oligosaccharide glucosidase	orf19.338	Protein detected by mass spec in stationary phase cultures; Hog1p-downregulated; shows colony morphology-related gene regulation by Ssn6p
YALI0B21560g	2.04542	1.0324	0.000102372	0.000431854	UP		weakly similar to uniprot|P35735 Saccharomyces cerevisiae YKL051w	YKL051W	SFK1	Plasma membrane protein that may act together with or upstream of Stt4p to generate normal levels of the essential phospholipid PI4P, at least partially mediates proper localization of Stt4p to the plasma membrane		Frag1/DRAM/Sfk1 family	orf19.2726	Plc1p-regulated
YALI0E09867g	2.04519	1.03224	0.019111	0.0431611	UP		similar to uniprot|Q12150 Saccharomyces cerevisiae YLR087c	YLR087C	CSF1	Protein required for fermentation at low temperature; the authentic, non-tagged protein is detected in highly purified mitochondria in high-throughput studies			orf19.956
YALI0C23276g	2.04067	1.02904	1.54694e-05	7.9512e-05	UP		weakly similar to wi|NCU00918.1 Neurospora crassa NCU00918.1 predicted protein, start by similarity					SPRY domain
YALI0C22968g	2.03619	1.02587	0.000132587	0.000540993	UP		some similarities with uniprot|Q92609 Homo sapiens TBC1 domain family member 5, hypothetical start					Rab-GTPase-TBC domain
YALI0A02200g	2.03536	1.02529	0.000320896	0.00117569	UP		weakly similar to uniprot|O14122 Schizosaccharomyces pombe Cullin 4 homolog (Cul-4)	YGR003W	CUL3	Ubiquitin-protein ligase, member of the cullin family with similarity to Cdc53p and human CUL3; required for ubiquitin-dependent degredation of the RNA Polymerase II subunit RPO21	SIMILAR TO	Cullin protein neddylation domain Cullin family
YALI0F27907g	2.035	1.02503	9.60622e-05	0.000407671	UP	ATG18	Autophagy-related protein 18	YFR021W	ATG18	Phosphoinositide binding protein required for vesicle formation in autophagy and the cytoplasm-to-vacuole targeting (Cvt) pathway; binds both phosphatidylinositol (3,5)-bisphosphate and phosphatidylinositol 3-phosphate; WD-40 repeat protein		WD domain, G-beta repeat	orf19.6064
YALI0D13046g	2.03476	1.02486	0.000253909	0.000962459	UP		similar to |P43558 uniprot|P43558 Saccharomyces cerevisiae YFL044c and Schizosaccharomyces pombe Hypothetical zinc finger protein	YFL044C	OTU1	Deubiquitylation enzyme that binds to the chaperone-ATPase Cdc48p; may contribute to regulation of protein degradation by deubiquitylating substrates that have been ubiquitylated by Ufd2p; member of the Ovarian Tumor (OTU) family		OTU-like cysteine protease	orf19.2933
YALI0D10835g	2.03437	1.02458	0.019561	0.0440053	UP		some similarities with uniprot|Q8NKB5 Aspergillus oryzae Secreted aspartic protease	YLR121C	YPS3	Aspartic protease, attached to the plasma membrane via a glycosylphosphatidylinositol (GPI) anchor	SIMILAR TO	Eukaryotic aspartyl protease
YALI0E15906g	2.03294	1.02357	0.0117397	0.0282295	UP		similar to uniprot|Q9UUK0 Schizosaccharomyces pombe Hypothetical 21.7 kDa protein	YLR456W		Putative protein of unknown function; null mutant displays increased resistance to antifungal agents gliotoxin, cycloheximide and H2O2		Pyridoxamine 5'-phosphate oxidase	orf19.4220	regulated by Gcn4p; repressed in response to amino acid starvation (3-aminotriazole treatment)
YALI0C24233g	2.03146	1.02252	0.000646579	0.00220845	UP		similar to uniprot|O13389 Emericella nidulans serine O- acetyltransferase	YNL277W	MET2	L-homoserine-O-acetyltransferase, catalyzes the conversion of homoserine to O-acetyl homoserine which is the first step of the methionine biosynthetic pathway	SIMILAR TO	alpha/beta hydrolase fold	orf19.1159	similar to A. nidulans CYSA serine O-trans-acetylase, suggesting that C. albicans uses an O-acetyl-serine (OAS) pathway of sulfur assimilation; induced upon biofilm formation
YALI0F24761g	2.03086	1.02209	0.00191987	0.00574785	UP		similar to DEHA0B14938g Debaryomyces hansenii, hypothetical start					Major Facilitator Superfamily	orf19.4905	decreased expression observed in an ssr1 homozygous null mutant
YALI0C14564g	2.02951	1.02113	0.0020107	0.00599999	UP		weakly similar to uniprot|Q04223 Saccharomyces cerevisiae YMR130w	YMR130W		Putative protein of unknown function; YMR130W is not an essential gene	SIMILAR TO	Haloacid dehalogenase-like hydrolase
YALI0F30415g	2.02848	1.0204	0.000247236	0.000940533	UP	BTN1	Protein BTN1	YJL059W	YHC3	Vacuolar membrane protein involved in the ATP-dependent transport of arginine into the vacuole and possibly in balancing ion homeostasis; homolog of human CLN3 involved in Batten disease (juvenile onset neuronal ceroid lipofuscinosis)		CLN3 protein	orf19.4059
YALI0C00407g	2.02514	1.01802	8.49967e-05	0.000365843	UP	LEU2	3-isopropylmalate dehydrogenase (3-IPM-DH) (IMDH) (EC 1.1.1.85) (Beta-IPM dehydrogenase)	YCL018W	LEU2	Beta-isopropylmalate dehydrogenase (IMDH), catalyzes the third step in the leucine biosynthesis pathway		Isocitrate/isopropylmalate dehydrogenase	LEU2	Isopropyl malate dehydrogenase; enzyme of leucine biosynthesis; upregulated in the presence of human whole blood or polymorphonuclear (PMN) cells; protein level decreased in stationary phase cultures
YALI0E03124g	2.02452	1.01758	0.000424316	0.00151443	UP		no similarity, hypothetical start					Mysoin-binding motif of peroxisomes
YALI0B09383g	2.02245	1.0161	0.000839422	0.00278771	UP		weakly similar to uniprot|Q03767 Saccharomyces cerevisiae YDR150W NUM1 tubulin binding	YDR150W	NUM1	Protein required for nuclear migration, localizes to the mother cell cortex and the bud tip; may mediate interactions of dynein and cytoplasmic microtubules with the cell cortex		Meiotic cell cortex C-terminal pleckstrin homology	orf19.4715
YALI0E28941g	2.02046	1.01468	0.000237533	0.000908513	UP		weakly similar to uniprot|P53868 Saccharomyces cerevisiae YNL219c ALG9 mannosyltransferase	YNL219C	ALG9	Mannosyltransferase, involved in N-linked glycosylation; catalyzes the transfer of mannose from Dol-P-Man to lipid-linked oligosaccharides; mutation of the human ortholog causes type 1 congenital disorders of glycosylation		Alg9-like mannosyltransferase family	ALG9	Putative mannosyltransferase; similar to S. cerevisiae Alg9p; has HKEXRF motif
YALI0E09372g	2.01935	1.01389	0.0012624	0.00398807	UP		no similarity, hypothetical start					Homeodomain-like domain
YALI0E02200g	2.01406	1.01011	0.000129701	0.00053058	UP		no similarity, hypothetical start
YALI0C23562g	2.01139	1.00819	0.000105155	0.000442417	UP	PNG1	Peptide-N(4)-(N-acetyl-beta-glucosaminyl)asparagine amidase (PNGase) (EC 3.5.1.52) (Peptide:N-glycanase 1)	YPL096W	PNG1	Conserved peptide N-glycanase required for deglycosylation of misfolded glycoproteins during proteasome-dependent degradation, localizes to the cytoplasm and nucleus, interacts with the DNA repair protein Rad23p		Rad4 transglutaminase-like domain	orf19.26	induced by nitric oxide in yhb1 mutant
YALI0F29249g	2.01112	1.008	0.000597237	0.00205762	UP		weakly similar to uniprot|Q9P5P9 Neurospora crassa related to a-agglutinin core protein AGA1, hypothetical start					Regulator of G protein signaling domain
YALI0F23793g	2.01106	1.00795	9.66373e-06	5.18528e-05	UP		Aldehyde dehydrogenase	YMR110C	HFD1	Putative fatty aldehyde dehydrogenase, located in the mitochondrial outer membrane and also in lipid particles; has similarity to human fatty aldehyde dehydrogenase (FALDH) which is implicated in Sjogren-Larsson syndrome	SIMILAR TO	Aldehyde dehydrogenase family
YALI0F03135g	2.00708	1.0051	0.000970779	0.00315951	UP		no similarity, hypothetical start					Fungal Zn(2)-Cys(6) binuclear cluster domain Fungal specific transcription factor domain
YALI0E05621g	2.00482	1.00347	9.88039e-05	0.00041791	UP		similar to uniprot|Q9URW6 Schizosaccharomyces pombe SPAPJ696.02 SH3 domain protein, start by similarity					SH3 domain Family of unknown function (DUF500)	orf19.4127
[truncated: 661 more rows]

## Sheet:  upc2Δ Hypoxia-v-Wildtype norm
Legend: see Tab1
[truncated: 2,965 more rows]

## Sheet:  sre1Δ Hypoxia-v-Wildtype norm
Legend: see tab 1
[truncated: 2,543 more rows]

## Sheet:  sre1ΔHypoxia-v-WildtypeHypoxia
Legend: see tab 1
[truncated: 1,207 more rows]
