# Supplementary material for: Zinc Finger Transcription Factors Displaced SREBP Proteins as the Major Sterol Regulators during Saccharomycotina Evolution
Source: PLoS Genet. 2014 Jan 16;10(1):e1004076. doi: 10.1371/journal.pgen.1004076 (PMC3894159; doi:10.1371/journal.pgen.1004076)
Supplement: Table S6 — Full list of enriched gene sets from Table 2. (XLSX) [file pgen.1004076.s013.xlsx]

## Sheet: Wildtype Hypoxia -v-Normoxia
Table S6 Full list of enriched gene sets from Table 2.
Gene enrichment in wildtype cells growing in hypoxia
Upregulated genes
Annotation Cluster 1	Enrichment Score: 7.745343572164672
Category	Term	Count	%	PValue	Genes	List Total	Pop Hits	Pop Total	Fold Enrichment	Bonferroni	Benjamini	FDR
GOTERM_CC_FAT	GO:0031224~intrinsic to membrane	102	8.01257	9.34771e-16	YALI0D08228G, YALI0E29645G, YALI0F03498G, YALI0B17930G, YALI0F25685G, YALI0B10736G, YALI0E15730G, YALI0F30063G, YALI0D20262G, YALI0D20196G, YALI0B04026G, YALI0D00132G, YALI0B01342G, YALI0E15796G, YALI0F07106G, YALI0D19580G, YALI0B20966G, YALI0E12221G, YALI0D19558G, YALI0D08382G, YALI0A01023G, YALI0A18183G, YALI0D22638G, YALI0E04510G, YALI0E21780G, YALI0C05951G, YALI0D27038G, YALI0B21230G, YALI0D0…	146	425	1090	1.79178	6.4837e-14	6.4837e-14	9.32587e-13
GOTERM_CC_FAT	GO:0016021~integral to membrane	101	7.93401	1.81993e-15	YALI0D08228G, YALI0E29645G, YALI0F03498G, YALI0B17930G, YALI0F25685G, YALI0B10736G, YALI0E15730G, YALI0F30063G, YALI0D20262G, YALI0D20196G, YALI0B04026G, YALI0D00132G, YALI0B01342G, YALI0E15796G, YALI0F07106G, YALI0D19580G, YALI0B20966G, YALI0E12221G, YALI0D19558G, YALI0D08382G, YALI0A01023G, YALI0A18183G, YALI0D22638G, YALI0E04510G, YALI0E21780G, YALI0C05951G, YALI0D27038G, YALI0B21230G, YALI0D0…	146	421	1090	1.79107	1.29674e-13	6.4837e-14	1.85407e-12
SP_PIR_KEYWORDS	transmembrane	68	5.34171	0.0785475	YALI0D08228G, YALI0F03498G, YALI0F06776G, YALI0B17930G, YALI0E20713G, YALI0B10736G, YALI0F30063G, YALI0B04202G, YALI0E28622G, YALI0D00132G, YALI0D24233G, YALI0D09933G, YALI0C05753G, YALI0B01342G, YALI0C17237G, YALI0F07106G, YALI0A21307G, YALI0B09537G, YALI0D19580G, YALI0E07205G, YALI0D19646G, YALI0D07986G, YALI0F06578G, YALI0F19866G, YALI0D19558G, YALI0C03608G, YALI0D08382G, YALI0A01023G, YALI0F2…	1258	292	6434	1.19104	0.999992	0.946308	62.046
SP_PIR_KEYWORDS	membrane	53	4.16339	0.781151	YALI0D08228G, YALI0B17930G, YALI0F06776G, YALI0A06699G, YALI0B10736G, YALI0F30063G, YALI0B04026G, YALI0B04202G, YALI0E28622G, YALI0D00132G, YALI0D24233G, YALI0D09933G, YALI0C05753G, YALI0B01342G, YALI0F07106G, YALI0D07986G, YALI0F06578G, YALI0C03608G, YALI0E32131G, YALI0A01023G, YALI0E13442G, YALI0C12100G, YALI0C13530G, YALI0A16060G, YALI0E19338G, YALI0D18403G, YALI0B05280G, YALI0E21780G, YALI0D2…	1258	290	6434	0.934713	1	0.999443	100
Annotation Cluster 2	Enrichment Score: 3.090580142592419
Category	Term	Count	%	PValue	Genes	List Total	Pop Hits	Pop Total	Fold Enrichment	Bonferroni	Benjamini	FDR
GOTERM_MF_FAT	GO:0004180~carboxypeptidase activity	9	0.706991	6.33603e-05	YALI0B13310G, YALI0D08052G, YALI0C23661G, YALI0B20812G, YALI0B01408G, YALI0C21604G, YALI0F11803G, YALI0A18810G, YALI0C00803G	457	11	2705	4.84285	0.0247793	0.0124674	0.0882099
GOTERM_MF_FAT	GO:0004185~serine-type carboxypeptidase activity	8	0.628437	0.000278956	YALI0D08052G, YALI0C23661G, YALI0B20812G, YALI0B01408G, YALI0C21604G, YALI0F11803G, YALI0A18810G, YALI0C00803G	457	10	2705	4.73523	0.104597	0.021854	0.38782
GOTERM_MF_FAT	GO:0070008~serine-type exopeptidase activity	8	0.628437	0.000278956	YALI0D08052G, YALI0C23661G, YALI0B20812G, YALI0B01408G, YALI0C21604G, YALI0F11803G, YALI0A18810G, YALI0C00803G	457	10	2705	4.73523	0.104597	0.021854	0.38782
INTERPRO	IPR001563:Peptidase S10, serine carboxypeptidase	8	0.628437	0.000522335	YALI0D08052G, YALI0C23661G, YALI0B20812G, YALI0B01408G, YALI0C21604G, YALI0F11803G, YALI0A18810G, YALI0C00803G	916	10	4938	4.31266	0.392204	0.15293	0.817068
INTERPRO	IPR018202:Peptidase S10, serine carboxypeptidase, active site	8	0.628437	0.000522335	YALI0D08052G, YALI0C23661G, YALI0B20812G, YALI0B01408G, YALI0C21604G, YALI0F11803G, YALI0A18810G, YALI0C00803G	916	10	4938	4.31266	0.392204	0.15293	0.817068
GOTERM_MF_FAT	GO:0008238~exopeptidase activity	10	0.785546	0.00296707	YALI0B13310G, YALI0D08052G, YALI0C23661G, YALI0F20592G, YALI0B20812G, YALI0B01408G, YALI0C21604G, YALI0F11803G, YALI0A18810G, YALI0C00803G	457	20	2705	2.95952	0.691707	0.122559	4.0541
GOTERM_MF_FAT	GO:0017171~serine hydrolase activity	14	1.09976	0.00687263	YALI0F23595G, YALI0A08360G, YALI0B20812G, YALI0F12353G, YALI0F11077G, YALI0B16500G, YALI0C21604G, YALI0C23661G, YALI0D08052G, YALI0A06435G, YALI0B01408G, YALI0F11803G, YALI0A18810G, YALI0C00803G	457	38	2705	2.1807	0.934843	0.177221	9.15814
GOTERM_MF_FAT	GO:0008236~serine-type peptidase activity	14	1.09976	0.00687263	YALI0F23595G, YALI0A08360G, YALI0B20812G, YALI0F12353G, YALI0F11077G, YALI0B16500G, YALI0C21604G, YALI0C23661G, YALI0D08052G, YALI0A06435G, YALI0B01408G, YALI0F11803G, YALI0A18810G, YALI0C00803G	457	38	2705	2.1807	0.934843	0.177221	9.15814
Annotation Cluster 3	Enrichment Score: 2.9428794800553995
Category	Term	Count	%	PValue	Genes	List Total	Pop Hits	Pop Total	Fold Enrichment	Bonferroni	Benjamini	FDR
GOTERM_MF_FAT	GO:0043167~ion binding	140	10.9976	5.23916e-05	YALI0D12925G, YALI0B04510G, YALI0A01892G, YALI0F11011G, YALI0B02852G, YALI0E28809G, YALI0B20944G, YALI0C11803G, YALI0C10967G, YALI0D04246G, YALI0C13750G, YALI0D01419G, YALI0D16357G, YALI0E05599G, YALI0E22198G, YALI0F11297G, YALI0E04114G, YALI0C23562G, YALI0F03003G, YALI0B14443G, YALI0C10010G, YALI0F12287G, YALI0E19965G, YALI0D06193G, YALI0E30899G, YALI0C00407G, YALI0C06171G, YALI0F20592G, YALI0C0…	457	628	2705	1.31953	0.0205339	0.0205339	0.0729446
GOTERM_MF_FAT	GO:0043169~cation binding	140	10.9976	5.23916e-05	YALI0D12925G, YALI0B04510G, YALI0A01892G, YALI0F11011G, YALI0B02852G, YALI0E28809G, YALI0B20944G, YALI0C11803G, YALI0C10967G, YALI0D04246G, YALI0C13750G, YALI0D01419G, YALI0D16357G, YALI0E05599G, YALI0E22198G, YALI0F11297G, YALI0E04114G, YALI0C23562G, YALI0F03003G, YALI0B14443G, YALI0C10010G, YALI0F12287G, YALI0E19965G, YALI0D06193G, YALI0E30899G, YALI0C00407G, YALI0C06171G, YALI0F20592G, YALI0C0…	457	628	2705	1.31953	0.0205339	0.0205339	0.0729446
GOTERM_MF_FAT	GO:0046872~metal ion binding	135	10.6049	0.000189003	YALI0D12925G, YALI0B04510G, YALI0A01892G, YALI0F11011G, YALI0B02852G, YALI0E28809G, YALI0B20944G, YALI0C11803G, YALI0C10967G, YALI0D04246G, YALI0C13750G, YALI0D01419G, YALI0D16357G, YALI0E05599G, YALI0E22198G, YALI0F11297G, YALI0E04114G, YALI0C23562G, YALI0F03003G, YALI0B14443G, YALI0C10010G, YALI0F12287G, YALI0E19965G, YALI0D06193G, YALI0E30899G, YALI0C00407G, YALI0C06171G, YALI0F20592G, YALI0C0…	457	616	2705	1.29719	0.0721193	0.018539	0.262915
GOTERM_MF_FAT	GO:0046914~transition metal ion binding	115	9.03378	0.000330657	YALI0B04510G, YALI0A01892G, YALI0F11011G, YALI0B02852G, YALI0E28809G, YALI0B20944G, YALI0D04246G, YALI0C13750G, YALI0D01419G, YALI0E22198G, YALI0F11297G, YALI0E04114G, YALI0C23562G, YALI0F03003G, YALI0B14443G, YALI0C10010G, YALI0F12287G, YALI0E19965G, YALI0D06193G, YALI0E30899G, YALI0C00407G, YALI0C06171G, YALI0F20592G, YALI0C09460G, YALI0F02981G, YALI0A20273G, YALI0E21780G, YALI0F21406G, YALI0C0…	457	515	2705	1.32173	0.122749	0.0215905	0.459545
GOTERM_MF_FAT	GO:0008270~zinc ion binding	76	5.97015	0.0311702	YALI0D07854G, YALI0F25861G, YALI0B08206G, YALI0D23749G, YALI0E12639G, YALI0B04510G, YALI0E12463G, YALI0D06952G, YALI0A01892G, YALI0F11011G, YALI0E24937G, YALI0D15510G, YALI0E28809G, YALI0E24277G, YALI0B20944G, YALI0E07810G, YALI0D01419G, YALI0C13750G, YALI0E31757G, YALI0E12683G, YALI0E16577G, YALI0E04114G, YALI0C23562G, YALI0B14443G, YALI0B13640G, YALI0C10010G, YALI0F12287G, YALI0E19965G, YALI0D0…	457	367	2705	1.22574	0.999996	0.420281	35.6632
SP_PIR_KEYWORDS	metal-binding	54	4.24195	0.411731	YALI0A08041G, YALI0B08206G, YALI0E12639G, YALI0E12463G, YALI0A01892G, YALI0B02852G, YALI0D15510G, YALI0E28809G, YALI0E24277G, YALI0C18315G, YALI0D09933G, YALI0C10967G, YALI0D16357G, YALI0E31757G, YALI0E04114G, YALI0C23562G, YALI0B14443G, YALI0D07282G, YALI0B13640G, YALI0E34650G, YALI0E31339G, YALI0C00407G, YALI0F13321G, YALI0F20592G, YALI0F02981G, YALI0A20273G, YALI0E18634G, YALI0D10615G, YALI0A1…	1258	262	6434	1.05413	1	0.99557	99.8133
Annotation Cluster 4	Enrichment Score: 2.6983162765003987
Category	Term	Count	%	PValue	Genes	List Total	Pop Hits	Pop Total	Fold Enrichment	Bonferroni	Benjamini	FDR
SMART	SM00355:ZnF_C2H2	20	1.57109	0.000797732	YALI0B13640G, YALI0F12287G, YALI0E19965G, YALI0F03157G, YALI0F25861G, YALI0C20713G, YALI0D13046G, YALI0D23749G, YALI0C12364G, YALI0E31845G, YALI0F11011G, YALI0E24937G, YALI0B00660G, YALI0A16841G, YALI0C13750G, YALI0B21582G, YALI0B05478G, YALI0D17820G, YALI0E04532G, YALI0E17215G	261	54	1528	2.1683	0.0876904	0.044851	0.904925
INTERPRO	IPR013087:Zinc finger, C2H2-type/integrase, DNA-binding	10	0.785546	0.00241508	YALI0A16841G, YALI0B13640G, YALI0C13750G, YALI0F03157G, YALI0B21582G, YALI0B05478G, YALI0D23749G, YALI0E31845G, YALI0C12364G, YALI0B00660G	916	18	4938	2.99491	0.900177	0.250272	3.72575
INTERPRO	IPR015880:Zinc finger, C2H2-like	20	1.57109	0.00265473	YALI0B13640G, YALI0F12287G, YALI0E19965G, YALI0F03157G, YALI0F25861G, YALI0C20713G, YALI0D13046G, YALI0D23749G, YALI0C12364G, YALI0E31845G, YALI0F11011G, YALI0E24937G, YALI0B00660G, YALI0A16841G, YALI0C13750G, YALI0B21582G, YALI0B05478G, YALI0D17820G, YALI0E04532G, YALI0E17215G	916	54	4938	1.9966	0.920606	0.245335	4.08829
INTERPRO	IPR007087:Zinc finger, C2H2-type	18	1.41398	0.0031472	YALI0B13640G, YALI0E19965G, YALI0F03157G, YALI0F25861G, YALI0D13046G, YALI0D23749G, YALI0C12364G, YALI0E31845G, YALI0F11011G, YALI0E24937G, YALI0B00660G, YALI0A16841G, YALI0C13750G, YALI0B21582G, YALI0B05478G, YALI0B09867G, YALI0E04532G, YALI0E17215G	916	47	4938	2.06457	0.950412	0.259479	4.82926
Annotation Cluster 5	Enrichment Score: 2.6004313534730317
Category	Term	Count	%	PValue	Genes	List Total	Pop Hits	Pop Total	Fold Enrichment	Bonferroni	Benjamini	FDR
GOTERM_BP_FAT	GO:0046942~carboxylic acid transport	14	1.09976	0.000392654	YALI0A18183G, YALI0B09537G, YALI0F03498G, YALI0D19646G, YALI0E07205G, YALI0E20713G, YALI0B19338G, YALI0D00495G, YALI0F30415G, YALI0F19866G, YALI0B16522G, YALI0C17237G, YALI0F25795G, YALI0B19800G	366	31	2326	2.87009	0.155385	0.0547364	0.552017
GOTERM_BP_FAT	GO:0015837~amine transport	14	1.09976	0.000392654	YALI0A18183G, YALI0B09537G, YALI0F03498G, YALI0D19646G, YALI0E07205G, YALI0E20713G, YALI0B19338G, YALI0D00495G, YALI0F30415G, YALI0F19866G, YALI0B16522G, YALI0C17237G, YALI0F25795G, YALI0B19800G	366	31	2326	2.87009	0.155385	0.0547364	0.552017
GOTERM_BP_FAT	GO:0015849~organic acid transport	14	1.09976	0.000392654	YALI0A18183G, YALI0B09537G, YALI0F03498G, YALI0D19646G, YALI0E07205G, YALI0E20713G, YALI0B19338G, YALI0D00495G, YALI0F30415G, YALI0F19866G, YALI0B16522G, YALI0C17237G, YALI0F25795G, YALI0B19800G	366	31	2326	2.87009	0.155385	0.0547364	0.552017
GOTERM_BP_FAT	GO:0006865~amino acid transport	14	1.09976	0.000392654	YALI0A18183G, YALI0B09537G, YALI0F03498G, YALI0D19646G, YALI0E07205G, YALI0E20713G, YALI0B19338G, YALI0D00495G, YALI0F30415G, YALI0F19866G, YALI0B16522G, YALI0C17237G, YALI0F25795G, YALI0B19800G	366	31	2326	2.87009	0.155385	0.0547364	0.552017
PIR_SUPERFAMILY	PIRSF006060:AA_transporter	13	1.02121	0.00108767	YALI0A18183G, YALI0B09537G, YALI0F03498G, YALI0D19646G, YALI0E07205G, YALI0E20713G, YALI0B19338G, YALI0D00495G, YALI0F19866G, YALI0B16522G, YALI0C17237G, YALI0F25795G, YALI0B19800G	199	30	1253	2.72848	0.192086	0.192086	1.35031
INTERPRO	IPR004841:Amino acid permease-associated region	14	1.09976	0.00210382	YALI0A18183G, YALI0B09537G, YALI0F03498G, YALI0D19646G, YALI0E07205G, YALI0E20713G, YALI0B04378G, YALI0B19338G, YALI0D00495G, YALI0F19866G, YALI0B16522G, YALI0C17237G, YALI0F25795G, YALI0B19800G	916	31	4938	2.43457	0.865616	0.28431	3.25297
GOTERM_MF_FAT	GO:0005275~amine transmembrane transporter activity	13	1.02121	0.00211646	YALI0A18183G, YALI0B09537G, YALI0F03498G, YALI0D19646G, YALI0E07205G, YALI0E20713G, YALI0B19338G, YALI0D00495G, YALI0F19866G, YALI0B16522G, YALI0C17237G, YALI0F25795G, YALI0B19800G	457	30	2705	2.56492	0.56786	0.0995635	2.90774
GOTERM_MF_FAT	GO:0015171~amino acid transmembrane transporter activity	13	1.02121	0.00211646	YALI0A18183G, YALI0B09537G, YALI0F03498G, YALI0D19646G, YALI0E07205G, YALI0E20713G, YALI0B19338G, YALI0D00495G, YALI0F19866G, YALI0B16522G, YALI0C17237G, YALI0F25795G, YALI0B19800G	457	30	2705	2.56492	0.56786	0.0995635	2.90774
INTERPRO	IPR002293:Amino acid/polyamine transporter I	13	1.02121	0.00493154	YALI0A18183G, YALI0B09537G, YALI0F03498G, YALI0D19646G, YALI0E07205G, YALI0E20713G, YALI0B19338G, YALI0D00495G, YALI0F19866G, YALI0B16522G, YALI0C17237G, YALI0F25795G, YALI0B19800G	916	30	4938	2.33603	0.991008	0.348389	7.46936
INTERPRO	IPR004840:Amino acid permease, conserved site	9	0.706991	0.0147621	YALI0B09537G, YALI0E07205G, YALI0B16522G, YALI0E20713G, YALI0B19338G, YALI0C17237G, YALI0D00495G, YALI0B19800G, YALI0F19866G	916	19	4938	2.55355	0.999999	0.565567	20.8269
INTERPRO	IPR004762:Amino acid permease, fungi	5	0.392773	0.043638	YALI0B16522G, YALI0B19338G, YALI0C17237G, YALI0B19800G, YALI0F19866G	916	8	4938	3.36927	1	0.855259	50.3732
PIR_SUPERFAMILY	PIRSF006060:amino acid transporter	5	0.392773	0.0805497	YALI0B09537G, YALI0F03498G, YALI0D19646G, YALI0B16522G, YALI0F25795G	199	11	1253	2.86204	1	0.935644	64.9751
Annotation Cluster 6	Enrichment Score: 2.096636363340431
Category	Term	Count	%	PValue	Genes	List Total	Pop Hits	Pop Total	Fold Enrichment	Bonferroni	Benjamini	FDR
GOTERM_MF_FAT	GO:0016671~oxidoreductase activity, acting on sulfur group of donors, disulfide as acceptor	6	0.471328	0.000690389	YALI0B08140G, YALI0D09603G, YALI0E30151G, YALI0C05533G, YALI0B03916G, YALI0E20119G	457	6	2705	5.91904	0.239279	0.0383164	0.95727
GOTERM_MF_FAT	GO:0016667~oxidoreductase activity, acting on sulfur group of donors	9	0.706991	0.00823527	YALI0C23078G, YALI0B08140G, YALI0D09603G, YALI0E30151G, YALI0D25894G, YALI0C05533G, YALI0B03916G, YALI0F30899G, YALI0E20119G	457	19	2705	2.80375	0.962171	0.185081	10.8788
INTERPRO	IPR002569:Methionine sulphoxide reductase A	3	0.235664	0.0902235	YALI0E30151G, YALI0B03916G, YALI0E20119G	916	3	4938	5.39083	1	0.959977	77.3451
Annotation Cluster 7	Enrichment Score: 1.7060634185354169
Category	Term	Count	%	PValue	Genes	List Total	Pop Hits	Pop Total	Fold Enrichment	Bonferroni	Benjamini	FDR
GOTERM_MF_FAT	GO:0003700~transcription factor activity	33	2.5923	0.000171603	YALI0B15818G, YALI0B08206G, YALI0B13200G, YALI0B04510G, YALI0D06952G, YALI0E24277G, YALI0B20944G, YALI0F17886G, YALI0D09757G, YALI0D01419G, YALI0E31757G, YALI0A18469G, YALI0E16577G, YALI0D20482G, YALI0F05346G, YALI0C10010G, YALI0D04466G, YALI0D06193G, YALI0C19151G, YALI0C11858G, YALI0F17468G, YALI0F16852G, YALI0E01606G, YALI0B12716G, YALI0F16511G, YALI0F13321G, YALI0D01353G, YALI0F03135G, YALI0E2…	457	102	2705	1.91498	0.0657026	0.0223988	0.238737
GOTERM_BP_FAT	GO:0051252~regulation of RNA metabolic process	38	2.98507	0.00124508	YALI0E27962G, YALI0B15818G, YALI0B08206G, YALI0B13200G, YALI0D06952G, YALI0B04510G, YALI0E13596G, YALI0E24277G, YALI0B20944G, YALI0F17886G, YALI0D09757G, YALI0D01419G, YALI0E31757G, YALI0A18469G, YALI0E16577G, YALI0D20482G, YALI0A19844G, YALI0F05346G, YALI0C10010G, YALI0D04466G, YALI0D06193G, YALI0C19151G, YALI0C11858G, YALI0F17468G, YALI0F16852G, YALI0E01606G, YALI0F10541G, YALI0F16511G, YALI0B1…	366	146	2326	1.65409	0.414752	0.125348	1.74068
GOTERM_BP_FAT	GO:0006355~regulation of transcription, DNA-dependent	38	2.98507	0.00124508	YALI0E27962G, YALI0B15818G, YALI0B08206G, YALI0B13200G, YALI0D06952G, YALI0B04510G, YALI0E13596G, YALI0E24277G, YALI0B20944G, YALI0F17886G, YALI0D09757G, YALI0D01419G, YALI0E31757G, YALI0A18469G, YALI0E16577G, YALI0D20482G, YALI0A19844G, YALI0F05346G, YALI0C10010G, YALI0D04466G, YALI0D06193G, YALI0C19151G, YALI0C11858G, YALI0F17468G, YALI0F16852G, YALI0E01606G, YALI0F10541G, YALI0F16511G, YALI0B1…	366	146	2326	1.65409	0.414752	0.125348	1.74068
GOTERM_MF_FAT	GO:0043565~sequence-specific DNA binding	16	1.25687	0.00392955	YALI0F05346G, YALI0C10010G, YALI0D04466G, YALI0F16852G, YALI0B13200G, YALI0B12716G, YALI0F17886G, YALI0D09757G, YALI0E31757G, YALI0E27742G, YALI0A18469G, YALI0F03388G, YALI0E16577G, YALI0F18458G, YALI0E15510G, YALI0D20482G	457	44	2705	2.15238	0.789689	0.14437	5.33608
GOTERM_MF_FAT	GO:0030528~transcription regulator activity	42	3.29929	0.00503816	YALI0B15818G, YALI0C13178G, YALI0B08206G, YALI0D15334G, YALI0B13200G, YALI0D06952G, YALI0B04510G, YALI0F11979G, YALI0E24277G, YALI0B20944G, YALI0F17886G, YALI0D09757G, YALI0D01419G, YALI0E31757G, YALI0A18469G, YALI0E16577G, YALI0D00803G, YALI0D20482G, YALI0F05346G, YALI0E32417G, YALI0C10010G, YALI0D04466G, YALI0D06193G, YALI0C19151G, YALI0C11858G, YALI0F17468G, YALI0F16852G, YALI0E01606G, YALI0C0…	457	166	2705	1.49759	0.864685	0.142606	6.79297
GOTERM_BP_FAT	GO:0045449~regulation of transcription	51	4.00628	0.0141757	YALI0E27962G, YALI0B08206G, YALI0D15334G, YALI0D06952G, YALI0B04510G, YALI0E13596G, YALI0F11979G, YALI0E24277G, YALI0B20944G, YALI0C10967G, YALI0D09757G, YALI0D01419G, YALI0E31757G, YALI0A18469G, YALI0C02629G, YALI0E16577G, YALI0E32417G, YALI0B13640G, YALI0C10010G, YALI0D04466G, YALI0D06193G, YALI0C11858G, YALI0F16852G, YALI0C03564G, YALI0B12716G, YALI0F16511G, YALI0F13321G, YALI0E27742G, YALI0D2…	366	239	2326	1.35613	0.997843	0.583981	18.2278
SMART	SM00338:BRLZ	6	0.471328	0.0165336	YALI0D09757G, YALI0D04466G, YALI0E27742G, YALI0F03388G, YALI0B13200G, YALI0B12716G	261	10	1528	3.51264	0.852991	0.472226	17.2963
INTERPRO	IPR004827:Basic-leucine zipper (bZIP) transcription factor	6	0.471328	0.0239074	YALI0D09757G, YALI0D04466G, YALI0E27742G, YALI0F03388G, YALI0B13200G, YALI0B12716G	916	10	4938	3.2345	1	0.68432	31.612
INTERPRO	IPR011616:bZIP transcription factor, bZIP-1	5	0.392773	0.043638	YALI0D09757G, YALI0E27742G, YALI0F03388G, YALI0B13200G, YALI0B12716G	916	8	4938	3.36927	1	0.855259	50.3732
SMART	SM00066:GAL4	14	1.09976	0.0892641	YALI0B15818G, YALI0C19151G, YALI0D06193G, YALI0C11858G, YALI0F17468G, YALI0E01606G, YALI0D06952G, YALI0B04510G, YALI0E24277G, YALI0F13321G, YALI0B20944G, YALI0F03135G, YALI0D01353G, YALI0D01419G	261	52	1528	1.57619	0.999979	0.658797	65.5296
GOTERM_MF_FAT	GO:0046983~protein dimerization activity	8	0.628437	0.0947583	YALI0D09757G, YALI0D17446G, YALI0D04466G, YALI0E27742G, YALI0F03388G, YALI0B13200G, YALI0F16489G, YALI0B12716G	457	24	2705	1.97301	1	0.697187	75.0062
INTERPRO	IPR001138:Fungal transcriptional regulatory protein, N-terminal	14	1.09976	0.151968	YALI0B15818G, YALI0C19151G, YALI0D06193G, YALI0C11858G, YALI0F17468G, YALI0E01606G, YALI0D06952G, YALI0B04510G, YALI0E24277G, YALI0F13321G, YALI0B20944G, YALI0F03135G, YALI0D01353G, YALI0D01419G	916	52	4938	1.45138	1	0.985674	92.4859
SP_PIR_KEYWORDS	dna-binding	16	1.25687	0.793036	YALI0B13640G, YALI0D04466G, YALI0C19151G, YALI0F17468G, YALI0F16852G, YALI0B08206G, YALI0B13200G, YALI0B12716G, YALI0E24277G, YALI0F13321G, YALI0F03135G, YALI0D09757G, YALI0E27742G, YALI0A18469G, YALI0F03388G, YALI0E15510G	1258	90	6434	0.909239	1	0.999301	100
GOTERM_MF_FAT	GO:0003677~DNA binding	39	3.06363	0.992948	YALI0B15818G, YALI0B08206G, YALI0B13200G, YALI0D06952G, YALI0B04510G, YALI0E13596G, YALI0E24277G, YALI0B20944G, YALI0F17886G, YALI0D09757G, YALI0D01419G, YALI0E31757G, YALI0A18469G, YALI0C02629G, YALI0E16577G, YALI0D20482G, YALI0F05346G, YALI0B14443G, YALI0B13640G, YALI0C10010G, YALI0D04466G, YALI0D06193G, YALI0C19151G, YALI0C11858G, YALI0F17468G, YALI0F16852G, YALI0E01606G, YALI0F16511G, YALI0B1…	457	310	2705	0.744653	1	1	100
Annotation Cluster 8	Enrichment Score: 1.629278776396396
Category	Term	Count	%	PValue	Genes	List Total	Pop Hits	Pop Total	Fold Enrichment	Bonferroni	Benjamini	FDR
GOTERM_MF_FAT	GO:0015297~antiporter activity	6	0.471328	0.00928713	YALI0E26345G, YALI0E29645G, YALI0D22913G, YALI0D20196G, YALI0D26730G, YALI0E02156G	457	9	2705	3.94602	0.97515	0.195349	12.1863
GOTERM_BP_FAT	GO:0015893~drug transport	4	0.314218	0.0299616	YALI0E26345G, YALI0D22913G, YALI0D20196G, YALI0D26730G	366	5	2326	5.08415	0.999998	0.663795	34.8682
GOTERM_BP_FAT	GO:0042493~response to drug	4	0.314218	0.0299616	YALI0E26345G, YALI0D22913G, YALI0D20196G, YALI0D26730G	366	5	2326	5.08415	0.999998	0.663795	34.8682
GOTERM_MF_FAT	GO:0015238~drug transporter activity	4	0.314218	0.0364648	YALI0E26345G, YALI0D22913G, YALI0D20196G, YALI0D26730G	457	5	2705	4.73523	1	0.444783	40.3908
Annotation Cluster 9	Enrichment Score: 1.508477207580066
Category	Term	Count	%	PValue	Genes	List Total	Pop Hits	Pop Total	Fold Enrichment	Bonferroni	Benjamini	FDR
GOTERM_BP_FAT	GO:0006508~proteolysis	50	3.92773	0.00289848	YALI0B20812G, YALI0D02024G, YALI0D22957G, YALI0C01133G, YALI0B16500G, YALI0F16489G, YALI0C19382G, YALI0E24453G, YALI0F27071G, YALI0A16819G, YALI0E10175G, YALI0E11715G, YALI0C00803G, YALI0F23595G, YALI0F05940G, YALI0E33363G, YALI0F20592G, YALI0E18117G, YALI0A13013G, YALI0A02200G, YALI0D16335G, YALI0C20119G, YALI0C20273G, YALI0D17446G, YALI0C21604G, YALI0D10835G, YALI0E17831G, YALI0D08052G, YALI0C2…	366	216	2326	1.47111	0.712966	0.220912	4.00871
GOTERM_MF_FAT	GO:0008233~peptidase activity	44	3.4564	0.00454403	YALI0D16335G, YALI0C20273G, YALI0D17446G, YALI0B20812G, YALI0D02024G, YALI0D22957G, YALI0F16489G, YALI0B16500G, YALI0C21604G, YALI0C01133G, YALI0D10835G, YALI0C19382G, YALI0F27071G, YALI0A16819G, YALI0D08052G, YALI0E17831G, YALI0C23661G, YALI0A06435G, YALI0E10175G, YALI0E11715G, YALI0C00803G, YALI0F23595G, YALI0A08360G, YALI0B21186G, YALI0B05258G, YALI0D10967G, YALI0A13277G, YALI0E29205G, YALI0F1…	457	175	2705	1.48822	0.835284	0.151222	6.14619
INTERPRO	IPR001461:Peptidase A1	15	1.17832	0.00589921	YALI0C20273G, YALI0D10967G, YALI0D02024G, YALI0C10923G, YALI0D22957G, YALI0D10835G, YALI0C12980G, YALI0A16819G, YALI0E33363G, YALI0F27071G, YALI0F10549G, YALI0A13013G, YALI0B05654G, YALI0E10175G, YALI0E11715G	916	38	4938	2.12796	0.996442	0.351918	8.87228
INTERPRO	IPR009007:Peptidase aspartic, catalytic	15	1.17832	0.00589921	YALI0C20273G, YALI0D10967G, YALI0D02024G, YALI0C10923G, YALI0D22957G, YALI0D10835G, YALI0C12980G, YALI0A16819G, YALI0E33363G, YALI0F27071G, YALI0F10549G, YALI0A13013G, YALI0B05654G, YALI0E10175G, YALI0E11715G	916	38	4938	2.12796	0.996442	0.351918	8.87228
GOTERM_MF_FAT	GO:0070011~peptidase activity, acting on L-amino acid peptides	39	3.06363	0.021703	YALI0D16335G, YALI0C20273G, YALI0D17446G, YALI0B20812G, YALI0D02024G, YALI0D22957G, YALI0F16489G, YALI0C21604G, YALI0B16500G, YALI0D10835G, YALI0C19382G, YALI0F27071G, YALI0A16819G, YALI0D08052G, YALI0E17831G, YALI0C23661G, YALI0A06435G, YALI0E10175G, YALI0E11715G, YALI0C00803G, YALI0F23595G, YALI0A08360G, YALI0D10967G, YALI0A13277G, YALI0F12353G, YALI0F11077G, YALI0C10923G, YALI0F05940G, YALI0E0…	457	165	2705	1.39905	0.999832	0.35238	26.3319
GOTERM_MF_FAT	GO:0070001~aspartic-type peptidase activity	15	1.17832	0.04405	YALI0C20273G, YALI0D10967G, YALI0D02024G, YALI0C10923G, YALI0D22957G, YALI0D10835G, YALI0C12980G, YALI0A16819G, YALI0E33363G, YALI0F27071G, YALI0F10549G, YALI0A13013G, YALI0B05654G, YALI0E10175G, YALI0E11715G	457	52	2705	1.70741	1	0.496485	46.6041
GOTERM_MF_FAT	GO:0004190~aspartic-type endopeptidase activity	15	1.17832	0.04405	YALI0C20273G, YALI0D10967G, YALI0D02024G, YALI0C10923G, YALI0D22957G, YALI0D10835G, YALI0C12980G, YALI0A16819G, YALI0E33363G, YALI0F27071G, YALI0F10549G, YALI0A13013G, YALI0B05654G, YALI0E10175G, YALI0E11715G	457	52	2705	1.70741	1	0.496485	46.6041
SP_PIR_KEYWORDS	Aspartyl protease	9	0.706991	0.0975197	YALI0C20273G, YALI0F10549G, YALI0B05654G, YALI0D02024G, YALI0E10175G, YALI0D10835G, YALI0F27071G, YALI0E33363G, YALI0A16819G	1258	25	6434	1.84121	1	0.840247	70.3343
INTERPRO	IPR001969:Peptidase aspartic, active site	11	0.864101	0.151272	YALI0C20273G, YALI0F10549G, YALI0B05654G, YALI0D10967G, YALI0D02024G, YALI0E10175G, YALI0D22957G, YALI0D10835G, YALI0F27071G, YALI0E33363G, YALI0A16819G	916	38	4938	1.5605	1	0.986988	92.3886
GOTERM_MF_FAT	GO:0004175~endopeptidase activity	24	1.88531	0.186219	YALI0F23595G, YALI0A08360G, YALI0C20273G, YALI0D10967G, YALI0F12353G, YALI0D02024G, YALI0D22957G, YALI0F11077G, YALI0C10923G, YALI0B16500G, YALI0F05940G, YALI0D10835G, YALI0C19382G, YALI0F27071G, YALI0E33363G, YALI0C12980G, YALI0A16819G, YALI0E17831G, YALI0A06435G, YALI0F10549G, YALI0A13013G, YALI0B05654G, YALI0E10175G, YALI0E11715G	457	113	2705	1.25714	1	0.830338	94.3301
SP_PIR_KEYWORDS	Protease	17	1.33543	0.481133	YALI0F23595G, YALI0D16335G, YALI0A08360G, YALI0C20273G, YALI0A13277G, YALI0D02024G, YALI0B16500G, YALI0D10835G, YALI0C19382G, YALI0F27071G, YALI0A16819G, YALI0E33363G, YALI0A06435G, YALI0F20592G, YALI0F10549G, YALI0B05654G, YALI0E10175G	1258	79	6434	1.10058	1	0.994551	99.9578
Annotation Cluster 10	Enrichment Score: 1.3674354520303977
Category	Term	Count	%	PValue	Genes	List Total	Pop Hits	Pop Total	Fold Enrichment	Bonferroni	Benjamini	FDR
UP_SEQ_FEATURE	signal peptide	10	0.785546	0.00139034	YALI0E32703G, YALI0F05390G, YALI0B05654G, YALI0D26906G, YALI0E23155G, YALI0A04895G, YALI0E32131G, YALI0D03465G, YALI0C23991G, YALI0F30415G	64	28	589	3.28683	0.210632	0.210632	1.68305
UP_SEQ_FEATURE	glycosylation site:N-linked (GlcNAc...)	10	0.785546	0.00184559	YALI0C03608G, YALI0E31797G, YALI0B05654G, YALI0E23155G, YALI0F06358G, YALI0D04202G, YALI0E08580G, YALI0E32131G, YALI0D03465G, YALI0C23991G	64	29	589	3.17349	0.26951	0.145313	2.22846
GOTERM_CC_FAT	GO:0005576~extracellular region	6	0.471328	0.00561376	YALI0F05390G, YALI0B05654G, YALI0D08140G, YALI0F17490G, YALI0D03465G, YALI0C23991G	146	10	1090	4.47945	0.336986	0.128018	5.70681
SP_PIR_KEYWORDS	Secreted	4	0.314218	0.0254168	YALI0F05390G, YALI0B05654G, YALI0D03465G, YALI0C23991G	1258	4	6434	5.11447	0.974817	0.841309	26.2803
SP_PIR_KEYWORDS	signal	10	0.785546	0.0793606	YALI0E32703G, YALI0F05390G, YALI0B05654G, YALI0D26906G, YALI0E23155G, YALI0A04895G, YALI0E32131G, YALI0D03465G, YALI0C23991G, YALI0F30415G	1258	28	6434	1.8266	0.999993	0.906036	62.4407
SP_PIR_KEYWORDS	glycoprotein	10	0.785546	0.0960004	YALI0C03608G, YALI0E31797G, YALI0B05654G, YALI0E23155G, YALI0F06358G, YALI0D04202G, YALI0E08580G, YALI0E32131G, YALI0D03465G, YALI0C23991G	1258	29	6434	1.76361	0.999999	0.872773	69.7374
UP_SEQ_FEATURE	disulfide bond	3	0.235664	0.290818	YALI0F05390G, YALI0B05654G, YALI0C23991G	64	10	589	2.76094	1	0.999326	98.489
SP_PIR_KEYWORDS	disulfide bond	3	0.235664	0.610224	YALI0F05390G, YALI0B05654G, YALI0C23991G	1258	10	6434	1.53434	1	0.998365	99.9986
SP_PIR_KEYWORDS	endoplasmic reticulum	6	0.471328	0.996461	YALI0E32703G, YALI0E31797G, YALI0E23155G, YALI0F06358G, YALI0D04202G, YALI0E32131G	1258	62	6434	0.494948	1	1	100
Annotation Cluster 11	Enrichment Score: 1.3669890434099379
Category	Term	Count	%	PValue	Genes	List Total	Pop Hits	Pop Total	Fold Enrichment	Bonferroni	Benjamini	FDR
GOTERM_MF_FAT	GO:0015205~nucleobase transmembrane transporter activity	4	0.314218	0.0166614	YALI0D07392G, YALI0F30569G, YALI0D05621G, YALI0D19756G	457	4	2705	5.91904	0.998711	0.309017	20.8646
GOTERM_MF_FAT	GO:0015932~nucleobase, nucleoside, nucleotide and nucleic acid transmembrane transporter activity	5	0.392773	0.0182173	YALI0D07392G, YALI0F30569G, YALI0D05621G, YALI0D19756G, YALI0C23342G	457	7	2705	4.22788	0.999311	0.318315	22.5907
INTERPRO	IPR001248:Permease, cytosine/purines, uracil, thiamine, allantoin	4	0.314218	0.0218631	YALI0D07392G, YALI0F30569G, YALI0D05621G, YALI0D19756G	916	4	4938	5.39083	1	0.670037	29.328
GOTERM_BP_FAT	GO:0015931~nucleobase, nucleoside, nucleotide and nucleic acid transport	4	0.314218	0.513021	YALI0D07392G, YALI0F30569G, YALI0D05621G, YALI0D19756G	366	17	2326	1.49534	1	0.998801	99.9961
Annotation Cluster 12	Enrichment Score: 1.312241623821874
Category	Term	Count	%	PValue	Genes	List Total	Pop Hits	Pop Total	Fold Enrichment	Bonferroni	Benjamini	FDR
GOTERM_BP_FAT	GO:0006633~fatty acid biosynthetic process	8	0.628437	0.0146799	YALI0D20878G, YALI0F12749G, YALI0E17347G, YALI0F11297G, YALI0B15059G, YALI0D06237G, YALI0C05951G, YALI0E21131G	366	18	2326	2.82453	0.998269	0.548371	18.8154
INTERPRO	IPR006694:Fatty acid hydroxylase	4	0.314218	0.0218631	YALI0D20878G, YALI0F12749G, YALI0E17347G, YALI0F11297G	916	4	4938	5.39083	1	0.670037	29.328
GOTERM_BP_FAT	GO:0006631~fatty acid metabolic process	9	0.706991	0.049144	YALI0D20878G, YALI0F12749G, YALI0C23859G, YALI0E17347G, YALI0F11297G, YALI0B15059G, YALI0D06237G, YALI0C05951G, YALI0E21131G	366	27	2326	2.1184	1	0.787279	50.8491
GOTERM_BP_FAT	GO:0008610~lipid biosynthetic process	15	1.17832	0.0758132	YALI0E32065G, YALI0F00682G, YALI0B04312G, YALI0D18403G, YALI0B15059G, YALI0C05951G, YALI0D03480G, YALI0D20878G, YALI0E28941G, YALI0F12749G, YALI0E17347G, YALI0F11297G, YALI0D04202G, YALI0D06237G, YALI0E21131G	366	60	2326	1.5888	1	0.86388	67.0852
GOTERM_BP_FAT	GO:0046394~carboxylic acid biosynthetic process	19	1.49254	0.105791	YALI0E30833G, YALI0C24233G, YALI0B19998G, YALI0B15059G, YALI0C05951G, YALI0E10571G, YALI0C00407G, YALI0B09647G, YALI0D20878G, YALI0F12749G, YALI0B08140G, YALI0E00836G, YALI0E17347G, YALI0F11297G, YALI0B20020G, YALI0E12683G, YALI0B08184G, YALI0D06237G, YALI0E21131G	366	85	2326	1.42057	1	0.898689	79.3204
GOTERM_BP_FAT	GO:0016053~organic acid biosynthetic process	19	1.49254	0.105791	YALI0E30833G, YALI0C24233G, YALI0B19998G, YALI0B15059G, YALI0C05951G, YALI0E10571G, YALI0C00407G, YALI0B09647G, YALI0D20878G, YALI0F12749G, YALI0B08140G, YALI0E00836G, YALI0E17347G, YALI0F11297G, YALI0B20020G, YALI0E12683G, YALI0B08184G, YALI0D06237G, YALI0E21131G	366	85	2326	1.42057	1	0.898689	79.3204
Downregulated genes
Annotation Cluster 1	Enrichment Score: 30.204245126021043
Category	Term	Count	%	PValue	Genes	List Total	Pop Hits	Pop Total	Fold Enrichment	Bonferroni	Benjamini	FDR
KEGG_PATHWAY	yli03010:Ribosome	64	9.7561	1.4564e-39	YALI0C09218G, YALI0D24387G, YALI0E23562G, YALI0B21076G, YALI0E00550G, YALI0B20504G, YALI0F05522G, YALI0B12848G, YALI0C11473G, YALI0F25531G, YALI0E25025G, YALI0E29073G, YALI0A10725G, YALI0B08866G, YALI0F24739G, YALI0E21219G, YALI0E27830G, YALI0C06820G, YALI0B12804G, YALI0D10263G, YALI0B05896G, YALI0F11055G, YALI0E13618G, YALI0E01452G, YALI0A20746G, YALI0D13882G, YALI0E31911G, YALI0B04224G, YALI0F0…	189	79	1167	5.00221	9.32097e-38	9.32097e-38	1.47956e-36
GOTERM_CC_FAT	GO:0043232~intracellular non-membrane-bounded organelle	108	16.4634	4.40698e-35	YALI0C09218G, YALI0E23562G, YALI0D26103G, YALI0B21076G, YALI0E00550G, YALI0D09251G, YALI0F05522G, YALI0C04774G, YALI0B00946G, YALI0E01782G, YALI0E25025G, YALI0F08371G, YALI0B12320G, YALI0E10879G, YALI0B08866G, YALI0B12804G, YALI0F24783G, YALI0B05896G, YALI0E01452G, YALI0A20746G, YALI0D13882G, YALI0E32208G, YALI0E34375G, YALI0E31911G, YALI0A11157G, YALI0B15103G, YALI0D13728G, YALI0F02827G, YALI0F0…	155	284	1090	2.67424	4.62733e-33	4.62733e-33	4.93637e-32
GOTERM_CC_FAT	GO:0043228~non-membrane-bounded organelle	108	16.4634	4.40698e-35	YALI0C09218G, YALI0E23562G, YALI0D26103G, YALI0B21076G, YALI0E00550G, YALI0D09251G, YALI0F05522G, YALI0C04774G, YALI0B00946G, YALI0E01782G, YALI0E25025G, YALI0F08371G, YALI0B12320G, YALI0E10879G, YALI0B08866G, YALI0B12804G, YALI0F24783G, YALI0B05896G, YALI0E01452G, YALI0A20746G, YALI0D13882G, YALI0E32208G, YALI0E34375G, YALI0E31911G, YALI0A11157G, YALI0B15103G, YALI0D13728G, YALI0F02827G, YALI0F0…	155	284	1090	2.67424	4.62733e-33	4.62733e-33	4.93637e-32
GOTERM_CC_FAT	GO:0005840~ribosome	71	10.8232	2.06035e-33	YALI0C09218G, YALI0D24387G, YALI0E23562G, YALI0D05753G, YALI0B21076G, YALI0E00550G, YALI0B20504G, YALI0F05522G, YALI0B12848G, YALI0F25531G, YALI0E25025G, YALI0E29073G, YALI0A10725G, YALI0B08866G, YALI0F24739G, YALI0E21219G, YALI0E27830G, YALI0C06820G, YALI0B12804G, YALI0D10263G, YALI0B05896G, YALI0F11055G, YALI0E13618G, YALI0E01452G, YALI0A20746G, YALI0D13882G, YALI0E32208G, YALI0E31911G, YALI0B0…	155	125	1090	3.99432	2.16337e-31	1.08169e-31	2.30785e-30
GOTERM_CC_FAT	GO:0030529~ribonucleoprotein complex	84	12.8049	2.39762e-33	YALI0C09218G, YALI0D24387G, YALI0E23562G, YALI0D05753G, YALI0B21076G, YALI0E00550G, YALI0B20504G, YALI0F05522G, YALI0F24013G, YALI0B12848G, YALI0B00946G, YALI0D00561G, YALI0E18854G, YALI0B03960G, YALI0E25025G, YALI0F25531G, YALI0F24497G, YALI0E29073G, YALI0A10725G, YALI0B08866G, YALI0C00913G, YALI0F24739G, YALI0E21219G, YALI0E27830G, YALI0C06820G, YALI0F29073G, YALI0B12804G, YALI0D10263G, YALI0B0…	155	176	1090	3.3563	2.5175e-31	8.39166e-32	2.68563e-30
GOTERM_MF_FAT	GO:0003735~structural constituent of ribosome	70	10.6707	8.26475e-33	YALI0C09218G, YALI0D24387G, YALI0E23562G, YALI0D05753G, YALI0B21076G, YALI0E00550G, YALI0B20504G, YALI0F05522G, YALI0B12848G, YALI0F25531G, YALI0E25025G, YALI0E29073G, YALI0A10725G, YALI0B08866G, YALI0F24739G, YALI0E21219G, YALI0E27830G, YALI0C06820G, YALI0B12804G, YALI0D10263G, YALI0B05896G, YALI0F11055G, YALI0E13618G, YALI0E01452G, YALI0A20746G, YALI0D13882G, YALI0E32208G, YALI0E31911G, YALI0B0…	348	121	2705	4.49677	2.35545e-30	2.35545e-30	1.09578e-29
GOTERM_BP_FAT	GO:0006412~translation	89	13.5671	3.57167e-31	YALI0C09218G, YALI0D24387G, YALI0E23562G, YALI0E04246G, YALI0D05753G, YALI0F02453G, YALI0B21076G, YALI0E00550G, YALI0B20504G, YALI0F21153G, YALI0F05522G, YALI0A01760G, YALI0B12848G, YALI0E25025G, YALI0F25531G, YALI0B12562G, YALI0E29073G, YALI0A10725G, YALI0B08866G, YALI0F24739G, YALI0E21219G, YALI0E27830G, YALI0C06820G, YALI0B12804G, YALI0D10263G, YALI0B05896G, YALI0F11055G, YALI0E13618G, YALI0E0…	294	204	2326	3.45161	1.54296e-28	1.54296e-28	5.03756e-28
GOTERM_MF_FAT	GO:0005198~structural molecule activity	70	10.6707	2.6789e-28	YALI0C09218G, YALI0D24387G, YALI0E23562G, YALI0D05753G, YALI0B21076G, YALI0E00550G, YALI0B20504G, YALI0F05522G, YALI0B12848G, YALI0F25531G, YALI0E25025G, YALI0E29073G, YALI0A10725G, YALI0B08866G, YALI0F24739G, YALI0E21219G, YALI0E27830G, YALI0C06820G, YALI0B12804G, YALI0D10263G, YALI0B05896G, YALI0F11055G, YALI0E13618G, YALI0E01452G, YALI0A20746G, YALI0D13882G, YALI0E32208G, YALI0E31911G, YALI0B0…	348	137	2705	3.9716	7.63486e-26	3.81743e-26	3.5518e-25
SP_PIR_KEYWORDS	ribonucleoprotein	38	5.79268	2.60768e-20	YALI0D24387G, YALI0C09218G, YALI0E31911G, YALI0E23562G, YALI0B04224G, YALI0B12276G, YALI0F05544G, YALI0D05753G, YALI0D13728G, YALI0E30602G, YALI0A18205G, YALI0F05676G, YALI0F08569G, YALI0F05803G, YALI0B12848G, YALI0C15895G, YALI0B00946G, YALI0E23584G, YALI0F06160G, YALI0F20482G, YALI0B12826G, YALI0F25531G, YALI0F24497G, YALI0D20614G, YALI0C21560G, YALI0D12903G, YALI0E27830G, YALI0E23694G, YALI0D0…	650	67	6434	5.61405	3.44214e-18	3.44214e-18	3.04503e-17
SP_PIR_KEYWORDS	ribosomal protein	35	5.33537	3.1474e-20	YALI0D24387G, YALI0C09218G, YALI0E31911G, YALI0E23562G, YALI0B04224G, YALI0F05544G, YALI0D05753G, YALI0D13728G, YALI0E30602G, YALI0A18205G, YALI0F05676G, YALI0F08569G, YALI0F05803G, YALI0B12848G, YALI0C15895G, YALI0E23584G, YALI0F06160G, YALI0F20482G, YALI0B12826G, YALI0F25531G, YALI0D20614G, YALI0C21560G, YALI0D12903G, YALI0E27830G, YALI0E23694G, YALI0D05731G, YALI0D10263G, YALI0B05896G, YALI0B1…	650	57	6434	6.078	4.15456e-18	2.07728e-18	3.67526e-17
Annotation Cluster 2	Enrichment Score: 2.981413144294636
Category	Term	Count	%	PValue	Genes	List Total	Pop Hits	Pop Total	Fold Enrichment	Bonferroni	Benjamini	FDR
GOTERM_BP_FAT	GO:0034660~ncRNA metabolic process	36	5.4878	1.2635e-06	YALI0C18095G, YALI0B12276G, YALI0E04246G, YALI0F16291G, YALI0E30723G, YALI0D22264G, YALI0D09251G, YALI0A01760G, YALI0B10560G, YALI0B00946G, YALI0B08943G, YALI0C15873G, YALI0B10582G, YALI0E01782G, YALI0F08921G, YALI0B16654G, YALI0F08371G, YALI0B12320G, YALI0D08668G, YALI0F24497G, YALI0E05005G, YALI0F02629G, YALI0C00913G, YALI0B23342G, YALI0B22572G, YALI0B18304G, YALI0A12133G, YALI0E26048G, YALI0E0…	294	124	2326	2.29691	0.000545682	0.000272878	0.00178205
GOTERM_BP_FAT	GO:0042254~ribosome biogenesis	24	3.65854	6.02198e-06	YALI0F24695G, YALI0C00913G, YALI0B23342G, YALI0B12276G, YALI0B22572G, YALI0C21846G, YALI0A12133G, YALI0E34287G, YALI0E02552G, YALI0D09251G, YALI0E16258G, YALI0B10560G, YALI0D09449G, YALI0B00946G, YALI0B14146G, YALI0F20768G, YALI0C15873G, YALI0E01782G, YALI0F08371G, YALI0B16654G, YALI0B16896G, YALI0B12320G, YALI0D08668G, YALI0F24497G	294	70	2326	2.71254	0.00259812	0.000866792	0.00849319
GOTERM_BP_FAT	GO:0022613~ribonucleoprotein complex biogenesis	24	3.65854	6.02198e-06	YALI0F24695G, YALI0C00913G, YALI0B23342G, YALI0B12276G, YALI0B22572G, YALI0C21846G, YALI0A12133G, YALI0E34287G, YALI0E02552G, YALI0D09251G, YALI0E16258G, YALI0B10560G, YALI0D09449G, YALI0B00946G, YALI0B14146G, YALI0F20768G, YALI0C15873G, YALI0E01782G, YALI0F08371G, YALI0B16654G, YALI0B16896G, YALI0B12320G, YALI0D08668G, YALI0F24497G	294	70	2326	2.71254	0.00259812	0.000866792	0.00849319
GOTERM_BP_FAT	GO:0034470~ncRNA processing	28	4.26829	6.50658e-06	YALI0C18095G, YALI0B12276G, YALI0E30723G, YALI0D09251G, YALI0B10560G, YALI0A01760G, YALI0B00946G, YALI0C15873G, YALI0B10582G, YALI0E01782G, YALI0F08371G, YALI0B16654G, YALI0F08921G, YALI0B12320G, YALI0D08668G, YALI0F24497G, YALI0C00913G, YALI0B23342G, YALI0B22572G, YALI0B18304G, YALI0A12133G, YALI0E26048G, YALI0E02552G, YALI0E06171G, YALI0E16258G, YALI0D09449G, YALI0F12771G, YALI0B19558G	294	90	2326	2.46138	0.0028069	0.000702466	0.00917662
GOTERM_BP_FAT	GO:0006396~RNA processing	41	6.25	2.63156e-05	YALI0C18095G, YALI0C00539G, YALI0E31911G, YALI0A11157G, YALI0B12276G, YALI0E30723G, YALI0D09251G, YALI0E30217G, YALI0A01760G, YALI0B10560G, YALI0E13486G, YALI0B00946G, YALI0D00561G, YALI0C15873G, YALI0E01782G, YALI0B10582G, YALI0E18854G, YALI0F26631G, YALI0F08921G, YALI0B16654G, YALI0F08371G, YALI0B12320G, YALI0D08668G, YALI0F24497G, YALI0E10109G, YALI0C00913G, YALI0B23342G, YALI0B22572G, YALI0B1…	294	169	2326	1.91937	0.0113041	0.00227111	0.0371096
SP_PIR_KEYWORDS	rrna processing	14	2.13415	9.06532e-05	YALI0B23342G, YALI0B12276G, YALI0B22572G, YALI0A12133G, YALI0E02552G, YALI0D09251G, YALI0D09449G, YALI0E16258G, YALI0B00946G, YALI0E01782G, YALI0F08371G, YALI0B16654G, YALI0B12320G, YALI0F24497G	650	40	6434	3.46446	0.0118955	0.00239049	0.105806
SP_PIR_KEYWORDS	ribosome biogenesis	13	1.98171	0.00012825	YALI0B23342G, YALI0B22572G, YALI0A12133G, YALI0E02552G, YALI0D09251G, YALI0D09449G, YALI0B00946G, YALI0E01782G, YALI0F08371G, YALI0B16654G, YALI0B16896G, YALI0B12320G, YALI0F24497G	650	36	6434	3.57444	0.0167875	0.00281769	0.149656
GOTERM_BP_FAT	GO:0016072~rRNA metabolic process	18	2.7439	0.0002421	YALI0B23342G, YALI0C00913G, YALI0B12276G, YALI0B22572G, YALI0A12133G, YALI0E02552G, YALI0D09251G, YALI0E16258G, YALI0D09449G, YALI0B10560G, YALI0B00946G, YALI0C15873G, YALI0E01782G, YALI0F08371G, YALI0B16654G, YALI0B12320G, YALI0D08668G, YALI0F24497G	294	55	2326	2.58924	0.0993153	0.0172822	0.340922
GOTERM_BP_FAT	GO:0006364~rRNA processing	18	2.7439	0.0002421	YALI0B23342G, YALI0C00913G, YALI0B12276G, YALI0B22572G, YALI0A12133G, YALI0E02552G, YALI0D09251G, YALI0E16258G, YALI0D09449G, YALI0B10560G, YALI0B00946G, YALI0C15873G, YALI0E01782G, YALI0F08371G, YALI0B16654G, YALI0B12320G, YALI0D08668G, YALI0F24497G	294	55	2326	2.58924	0.0993153	0.0172822	0.340922
GOTERM_CC_FAT	GO:0005730~nucleolus	12	1.82927	0.0216565	YALI0D09251G, YALI0D09449G, YALI0B23342G, YALI0B22572G, YALI0B00946G, YALI0E01782G, YALI0B16896G, YALI0B16654G, YALI0F08371G, YALI0E02552G, YALI0B12320G, YALI0F24497G	155	41	1090	2.05822	0.899632	0.318291	21.7487
UP_SEQ_FEATURE	short sequence motif:DEAD box	6	0.914634	0.142757	YALI0D09449G, YALI0B22572G, YALI0A12133G, YALI0E01782G, YALI0B16896G, YALI0E02552G	81	21	589	2.0776	1	0.978738	84.8683
GOTERM_CC_FAT	GO:0031981~nuclear lumen	13	1.98171	0.347528	YALI0B14883G, YALI0B23342G, YALI0B22572G, YALI0E02552G, YALI0D09251G, YALI0D09449G, YALI0B00946G, YALI0E01782G, YALI0F08371G, YALI0B16654G, YALI0B16896G, YALI0B12320G, YALI0F24497G	155	74	1090	1.2354	1	0.949658	99.1627
GOTERM_CC_FAT	GO:0043233~organelle lumen	13	1.98171	0.655387	YALI0B14883G, YALI0B23342G, YALI0B22572G, YALI0E02552G, YALI0D09251G, YALI0D09449G, YALI0B00946G, YALI0E01782G, YALI0F08371G, YALI0B16654G, YALI0B16896G, YALI0B12320G, YALI0F24497G	155	91	1090	1.00461	1	0.993808	99.9993
GOTERM_CC_FAT	GO:0070013~intracellular organelle lumen	13	1.98171	0.655387	YALI0B14883G, YALI0B23342G, YALI0B22572G, YALI0E02552G, YALI0D09251G, YALI0D09449G, YALI0B00946G, YALI0E01782G, YALI0F08371G, YALI0B16654G, YALI0B16896G, YALI0B12320G, YALI0F24497G	155	91	1090	1.00461	1	0.993808	99.9993
GOTERM_CC_FAT	GO:0031974~membrane-enclosed lumen	13	1.98171	0.770164	YALI0B14883G, YALI0B23342G, YALI0B22572G, YALI0E02552G, YALI0D09251G, YALI0D09449G, YALI0B00946G, YALI0E01782G, YALI0F08371G, YALI0B16654G, YALI0B16896G, YALI0B12320G, YALI0F24497G	155	99	1090	0.923428	1	0.998392	100
Annotation Cluster 3	Enrichment Score: 2.301680830166459
Category	Term	Count	%	PValue	Genes	List Total	Pop Hits	Pop Total	Fold Enrichment	Bonferroni	Benjamini	FDR
SP_PIR_KEYWORDS	atp-binding	56	8.53659	8.39271e-06	YALI0E19074G, YALI0D04961G, YALI0E35046G, YALI0E25201G, YALI0B09053G, YALI0E15928G, YALI0F07337G, YALI0E01782G, YALI0D19470G, YALI0D02607G, YALI0E32857G, YALI0B14201G, YALI0E10879G, YALI0D26620G, YALI0B08338G, YALI0B06897G, YALI0C15356G, YALI0B11352G, YALI0A12133G, YALI0A09724G, YALI0E07491G, YALI0D09449G, YALI0A00132G, YALI0C23639G, YALI0E34375G, YALI0D26015G, YALI0C18095G, YALI0C13090G, YALI0F1…	650	303	6434	1.82942	0.00110723	0.000276922	0.00979984
SP_PIR_KEYWORDS	nucleotide-binding	60	9.14634	0.00024561	YALI0E19074G, YALI0D04961G, YALI0E35046G, YALI0E25201G, YALI0B09053G, YALI0E15928G, YALI0A00352G, YALI0F07337G, YALI0C04774G, YALI0E01782G, YALI0D19470G, YALI0E32857G, YALI0D02607G, YALI0B14201G, YALI0E10879G, YALI0D26620G, YALI0B08338G, YALI0B06897G, YALI0C15356G, YALI0B11352G, YALI0A12133G, YALI0A09724G, YALI0E07491G, YALI0D09449G, YALI0A00132G, YALI0C23639G, YALI0E34375G, YALI0D26015G, YALI0C1…	650	373	6434	1.59225	0.0319045	0.00404486	0.286427
GOTERM_MF_FAT	GO:0005524~ATP binding	77	11.7378	0.00162024	YALI0C19129G, YALI0E19074G, YALI0E04246G, YALI0D04961G, YALI0E35046G, YALI0F05632G, YALI0E25201G, YALI0B09053G, YALI0E15928G, YALI0A01760G, YALI0F07337G, YALI0E24431G, YALI0D19470G, YALI0E01782G, YALI0B05610G, YALI0E32857G, YALI0D02607G, YALI0B14201G, YALI0E10879G, YALI0D26620G, YALI0B08338G, YALI0E33377G, YALI0C15356G, YALI0B06897G, YALI0B11352G, YALI0A12133G, YALI0A09724G, YALI0F24783G, YALI0E0…	348	437	2705	1.36961	0.370067	0.0882855	2.12698
GOTERM_MF_FAT	GO:0032559~adenyl ribonucleotide binding	77	11.7378	0.00183679	YALI0C19129G, YALI0E19074G, YALI0E04246G, YALI0D04961G, YALI0E35046G, YALI0F05632G, YALI0E25201G, YALI0B09053G, YALI0E15928G, YALI0A01760G, YALI0F07337G, YALI0E24431G, YALI0D19470G, YALI0E01782G, YALI0B05610G, YALI0E32857G, YALI0D02607G, YALI0B14201G, YALI0E10879G, YALI0D26620G, YALI0B08338G, YALI0E33377G, YALI0C15356G, YALI0B06897G, YALI0B11352G, YALI0A12133G, YALI0A09724G, YALI0F24783G, YALI0E0…	348	439	2705	1.36337	0.407832	0.0836231	2.40807
GOTERM_MF_FAT	GO:0001882~nucleoside binding	80	12.1951	0.0142841	YALI0C19129G, YALI0E19074G, YALI0E04246G, YALI0D04961G, YALI0E35046G, YALI0F05632G, YALI0E25201G, YALI0B09053G, YALI0E15928G, YALI0A01760G, YALI0F07337G, YALI0E24431G, YALI0D19470G, YALI0E01782G, YALI0B05610G, YALI0E32857G, YALI0D02607G, YALI0B14201G, YALI0E10879G, YALI0E12573G, YALI0D26620G, YALI0B08338G, YALI0E33377G, YALI0C15356G, YALI0B06897G, YALI0B11352G, YALI0A12133G, YALI0A09724G, YALI0F2…	348	495	2705	1.25624	0.983433	0.289434	17.3662
GOTERM_MF_FAT	GO:0030554~adenyl nucleotide binding	79	12.0427	0.0143924	YALI0C19129G, YALI0E19074G, YALI0E04246G, YALI0D04961G, YALI0E35046G, YALI0F05632G, YALI0E25201G, YALI0B09053G, YALI0E15928G, YALI0A01760G, YALI0F07337G, YALI0E24431G, YALI0D19470G, YALI0E01782G, YALI0B05610G, YALI0E32857G, YALI0D02607G, YALI0B14201G, YALI0E10879G, YALI0E12573G, YALI0D26620G, YALI0B08338G, YALI0E33377G, YALI0C15356G, YALI0B06897G, YALI0B11352G, YALI0A12133G, YALI0A09724G, YALI0F2…	348	488	2705	1.25833	0.983943	0.272265	17.4864
GOTERM_MF_FAT	GO:0001883~purine nucleoside binding	79	12.0427	0.0143924	YALI0C19129G, YALI0E19074G, YALI0E04246G, YALI0D04961G, YALI0E35046G, YALI0F05632G, YALI0E25201G, YALI0B09053G, YALI0E15928G, YALI0A01760G, YALI0F07337G, YALI0E24431G, YALI0D19470G, YALI0E01782G, YALI0B05610G, YALI0E32857G, YALI0D02607G, YALI0B14201G, YALI0E10879G, YALI0E12573G, YALI0D26620G, YALI0B08338G, YALI0E33377G, YALI0C15356G, YALI0B06897G, YALI0B11352G, YALI0A12133G, YALI0A09724G, YALI0F2…	348	488	2705	1.25833	0.983943	0.272265	17.4864
GOTERM_MF_FAT	GO:0000166~nucleotide binding	108	16.4634	0.0221608	YALI0E19074G, YALI0E04246G, YALI0E35046G, YALI0E25201G, YALI0C13860G, YALI0B09053G, YALI0A01760G, YALI0A00352G, YALI0C04774G, YALI0E01782G, YALI0B05610G, YALI0E10879G, YALI0E12573G, YALI0E33377G, YALI0C15356G, YALI0B06897G, YALI0B11352G, YALI0A12133G, YALI0F29073G, YALI0F24783G, YALI0E11869G, YALI0C23639G, YALI0E34375G, YALI0C00539G, YALI0A11157G, YALI0D13728G, YALI0F16291G, YALI0F09625G, YALI0D0…	348	709	2705	1.18404	0.998316	0.366316	25.7048
GOTERM_MF_FAT	GO:0032553~ribonucleotide binding	82	12.5	0.032352	YALI0C19129G, YALI0E19074G, YALI0E04246G, YALI0D04961G, YALI0E35046G, YALI0F05632G, YALI0E25201G, YALI0B09053G, YALI0C03355G, YALI0E15928G, YALI0A01760G, YALI0F07337G, YALI0A00352G, YALI0C04774G, YALI0E24431G, YALI0D19470G, YALI0E01782G, YALI0B05610G, YALI0E32857G, YALI0D02607G, YALI0B14201G, YALI0E10879G, YALI0D26620G, YALI0B08338G, YALI0E33377G, YALI0C15356G, YALI0B06897G, YALI0B11352G, YALI0A1…	348	527	2705	1.20946	0.999915	0.423822	35.3401
GOTERM_MF_FAT	GO:0032555~purine ribonucleotide binding	82	12.5	0.032352	YALI0C19129G, YALI0E19074G, YALI0E04246G, YALI0D04961G, YALI0E35046G, YALI0F05632G, YALI0E25201G, YALI0B09053G, YALI0C03355G, YALI0E15928G, YALI0A01760G, YALI0F07337G, YALI0A00352G, YALI0C04774G, YALI0E24431G, YALI0D19470G, YALI0E01782G, YALI0B05610G, YALI0E32857G, YALI0D02607G, YALI0B14201G, YALI0E10879G, YALI0D26620G, YALI0B08338G, YALI0E33377G, YALI0C15356G, YALI0B06897G, YALI0B11352G, YALI0A1…	348	527	2705	1.20946	0.999915	0.423822	35.3401
GOTERM_MF_FAT	GO:0017076~purine nucleotide binding	84	12.8049	0.114082	YALI0C19129G, YALI0E19074G, YALI0E04246G, YALI0D04961G, YALI0E35046G, YALI0F05632G, YALI0E25201G, YALI0B09053G, YALI0C03355G, YALI0E15928G, YALI0A01760G, YALI0F07337G, YALI0A00352G, YALI0C04774G, YALI0E24431G, YALI0D19470G, YALI0E01782G, YALI0B05610G, YALI0E32857G, YALI0D02607G, YALI0B14201G, YALI0E10879G, YALI0E12573G, YALI0D26620G, YALI0B08338G, YALI0E33377G, YALI0C15356G, YALI0B06897G, YALI0B1…	348	576	2705	1.13356	1	0.791788	79.9313
Annotation Cluster 4	Enrichment Score: 2.2971817712746594
Category	Term	Count	%	PValue	Genes	List Total	Pop Hits	Pop Total	Fold Enrichment	Bonferroni	Benjamini	FDR
INTERPRO	IPR012677:Nucleotide-binding, alpha-beta plait	16	2.43902	0.00295572	YALI0C00539G, YALI0B14883G, YALI0B12276G, YALI0D13728G, YALI0F29073G, YALI0D21450G, YALI0C13860G, YALI0F16115G, YALI0E03828G, YALI0D07876G, YALI0E31551G, YALI0A20867G, YALI0F07909G, YALI0E18854G, YALI0F25531G, YALI0E30877G	567	61	4938	2.28433	0.937379	0.602894	4.53155
SMART	SM00360:RRM	15	2.28659	0.00653162	YALI0C00539G, YALI0B14883G, YALI0B12276G, YALI0F18876G, YALI0D21450G, YALI0F29073G, YALI0C13860G, YALI0F16115G, YALI0E03828G, YALI0D07876G, YALI0E31551G, YALI0A20867G, YALI0F07909G, YALI0E18854G, YALI0E30877G	178	60	1528	2.14607	0.480716	0.279386	7.01524
INTERPRO	IPR000504:RNA recognition motif, RNP-1	15	2.28659	0.00664921	YALI0C00539G, YALI0B14883G, YALI0B12276G, YALI0F18876G, YALI0D21450G, YALI0F29073G, YALI0C13860G, YALI0F16115G, YALI0E03828G, YALI0D07876G, YALI0E31551G, YALI0A20867G, YALI0F07909G, YALI0E18854G, YALI0E30877G	567	60	4938	2.17725	0.998059	0.646807	9.9241
Annotation Cluster 5	Enrichment Score: 2.26063908869311
Category	Term	Count	%	PValue	Genes	List Total	Pop Hits	Pop Total	Fold Enrichment	Bonferroni	Benjamini	FDR
SP_PIR_KEYWORDS	rna-binding	18	2.7439	5.18092e-06	YALI0C00539G, YALI0B14883G, YALI0A11157G, YALI0B12276G, YALI0B22572G, YALI0D12903G, YALI0A12133G, YALI0F29073G, YALI0E02552G, YALI0F16115G, YALI0E03828G, YALI0D09449G, YALI0E01452G, YALI0B10582G, YALI0E01782G, YALI0B16896G, YALI0F24497G, YALI0B19558G	650	51	6434	3.49357	0.000683649	0.000227935	0.00604967
SP_PIR_KEYWORDS	ribosome biogenesis	13	1.98171	0.00012825	YALI0B23342G, YALI0B22572G, YALI0A12133G, YALI0E02552G, YALI0D09251G, YALI0D09449G, YALI0B00946G, YALI0E01782G, YALI0F08371G, YALI0B16654G, YALI0B16896G, YALI0B12320G, YALI0F24497G	650	36	6434	3.57444	0.0167875	0.00281769	0.149656
SP_PIR_KEYWORDS	helicase	15	2.28659	0.000181922	YALI0C08701G, YALI0D26620G, YALI0A11157G, YALI0A04939G, YALI0B22572G, YALI0D04961G, YALI0B11352G, YALI0A12133G, YALI0B09053G, YALI0E02552G, YALI0D09449G, YALI0B11968G, YALI0E01782G, YALI0B16896G, YALI0C23639G	650	48	6434	3.09327	0.0237298	0.00342496	0.212226
GOTERM_MF_FAT	GO:0070035~purine NTP-dependent helicase activity	17	2.59146	0.000387291	YALI0C08701G, YALI0D26620G, YALI0A11157G, YALI0E33377G, YALI0A04939G, YALI0B22572G, YALI0D04961G, YALI0B06897G, YALI0B11352G, YALI0A12133G, YALI0B09053G, YALI0E02552G, YALI0D09449G, YALI0B11968G, YALI0E01782G, YALI0B16896G, YALI0C23639G	348	51	2705	2.591	0.104523	0.0272224	0.51227
GOTERM_MF_FAT	GO:0008026~ATP-dependent helicase activity	17	2.59146	0.000387291	YALI0C08701G, YALI0D26620G, YALI0A11157G, YALI0E33377G, YALI0A04939G, YALI0B22572G, YALI0D04961G, YALI0B06897G, YALI0B11352G, YALI0A12133G, YALI0B09053G, YALI0E02552G, YALI0D09449G, YALI0B11968G, YALI0E01782G, YALI0B16896G, YALI0C23639G	348	51	2705	2.591	0.104523	0.0272224	0.51227
INTERPRO	IPR002464:DNA/RNA helicase, ATP-dependent, DEAH-box type, conserved site	6	0.914634	0.0029924	YALI0D26620G, YALI0B11968G, YALI0D04961G, YALI0B11352G, YALI0B09053G, YALI0C23639G	567	10	4938	5.2254	0.939498	0.504046	4.58656
GOTERM_MF_FAT	GO:0004386~helicase activity	19	2.89634	0.00382281	YALI0C08701G, YALI0E04136G, YALI0D26620G, YALI0A11157G, YALI0E33377G, YALI0A04939G, YALI0B22572G, YALI0D04961G, YALI0B06897G, YALI0B11352G, YALI0A12133G, YALI0B09053G, YALI0E02552G, YALI0D09449G, YALI0B11968G, YALI0E24431G, YALI0E01782G, YALI0B16896G, YALI0C23639G	348	73	2705	2.02311	0.664318	0.144391	4.95139
SMART	SM00487:DEXDc	16	2.43902	0.00398826	YALI0E04136G, YALI0D26620G, YALI0A11157G, YALI0A04939G, YALI0B22572G, YALI0D04961G, YALI0B06897G, YALI0B11352G, YALI0A12133G, YALI0B09053G, YALI0E02552G, YALI0D09449G, YALI0B11968G, YALI0E01782G, YALI0E24431G, YALI0B16896G	178	63	1528	2.18013	0.329427	0.329427	4.33862
INTERPRO	IPR014001:DEAD-like helicase, N-terminal	16	2.43902	0.00411992	YALI0E04136G, YALI0D26620G, YALI0A11157G, YALI0A04939G, YALI0B22572G, YALI0D04961G, YALI0B06897G, YALI0B11352G, YALI0A12133G, YALI0B09053G, YALI0E02552G, YALI0D09449G, YALI0B11968G, YALI0E01782G, YALI0E24431G, YALI0B16896G	567	63	4938	2.21181	0.97902	0.538301	6.26307
INTERPRO	IPR014021:Helicase, superfamily 1 and 2, ATP-binding	15	2.28659	0.00774939	YALI0E04136G, YALI0D26620G, YALI0A11157G, YALI0A04939G, YALI0B22572G, YALI0D04961G, YALI0B11352G, YALI0A12133G, YALI0B09053G, YALI0E02552G, YALI0D09449G, YALI0B11968G, YALI0E01782G, YALI0E24431G, YALI0B16896G	567	61	4938	2.14156	0.999312	0.64663	11.4744
SMART	SM00490:HELICc	15	2.28659	0.00886952	YALI0E04136G, YALI0D26620G, YALI0A11157G, YALI0A04939G, YALI0B22572G, YALI0D04961G, YALI0B11352G, YALI0A12133G, YALI0B09053G, YALI0E02552G, YALI0D09449G, YALI0B11968G, YALI0E01782G, YALI0E24431G, YALI0B16896G	178	62	1528	2.07684	0.589717	0.256933	9.41532
INTERPRO	IPR001650:DNA/RNA helicase, C-terminal	15	2.28659	0.00898929	YALI0E04136G, YALI0D26620G, YALI0A11157G, YALI0A04939G, YALI0B22572G, YALI0D04961G, YALI0B11352G, YALI0A12133G, YALI0B09053G, YALI0E02552G, YALI0D09449G, YALI0B11968G, YALI0E01782G, YALI0E24431G, YALI0B16896G	567	62	4938	2.10701	0.999787	0.652331	13.1917
INTERPRO	IPR014014:RNA helicase, DEAD-box type, Q motif	8	1.21951	0.011859	YALI0A11157G, YALI0D09449G, YALI0A04939G, YALI0B22572G, YALI0A12133G, YALI0E01782G, YALI0B16896G, YALI0E02552G	567	23	4938	3.02922	0.999986	0.710821	17.0473
UP_SEQ_FEATURE	domain:Helicase ATP-binding	9	1.37195	0.0126384	YALI0A11157G, YALI0D09449G, YALI0B22572G, YALI0D04961G, YALI0A12133G, YALI0E01782G, YALI0B16896G, YALI0C23639G, YALI0E02552G	81	25	589	2.61778	0.89202	0.89202	14.4379
GOTERM_MF_FAT	GO:0016887~ATPase activity	25	3.81098	0.0139112	YALI0A11157G, YALI0A02068G, YALI0D04961G, YALI0E25201G, YALI0B09053G, YALI0E10747G, YALI0F07337G, YALI0B11968G, YALI0E01782G, YALI0E32857G, YALI0C08701G, YALI0D26620G, YALI0B08338G, YALI0E33377G, YALI0B22572G, YALI0A04939G, YALI0B06897G, YALI0E13277G, YALI0B11352G, YALI0A12133G, YALI0D22803G, YALI0E02552G, YALI0D09449G, YALI0C23639G, YALI0B16896G	348	119	2705	1.63298	0.981547	0.304385	16.9508
INTERPRO	IPR000629:RNA helicase, ATP-dependent, DEAD-box, conserved site	8	1.21951	0.0151306	YALI0A11157G, YALI0D09449G, YALI0A04939G, YALI0B22572G, YALI0A12133G, YALI0E01782G, YALI0B16896G, YALI0E02552G	567	24	4938	2.903	0.999999	0.695537	21.2471
GOTERM_MF_FAT	GO:0042623~ATPase activity, coupled	22	3.35366	0.0275756	YALI0C08701G, YALI0D26620G, YALI0A11157G, YALI0B08338G, YALI0E33377G, YALI0A04939G, YALI0B22572G, YALI0A02068G, YALI0D04961G, YALI0B06897G, YALI0B11352G, YALI0E25201G, YALI0A12133G, YALI0B09053G, YALI0E02552G, YALI0E10747G, YALI0D09449G, YALI0F07337G, YALI0B11968G, YALI0E01782G, YALI0B16896G, YALI0C23639G	348	107	2705	1.59818	0.999654	0.39231	30.9781
UP_SEQ_FEATURE	nucleotide phosphate-binding region:ATP	13	1.98171	0.0310613	YALI0E34375G, YALI0A11157G, YALI0E19074G, YALI0C18689G, YALI0B22572G, YALI0D04961G, YALI0A12133G, YALI0A09724G, YALI0E02552G, YALI0D09449G, YALI0E01782G, YALI0B16896G, YALI0C23639G	81	51	589	1.85355	0.996002	0.841285	32.0797
UP_SEQ_FEATURE	domain:Helicase C-terminal	8	1.21951	0.032772	YALI0A11157G, YALI0D09449G, YALI0B22572G, YALI0D04961G, YALI0A12133G, YALI0E01782G, YALI0B16896G, YALI0E02552G	81	24	589	2.42387	0.997065	0.767251	33.5353
UP_SEQ_FEATURE	short sequence motif:Q motif	7	1.06707	0.0641523	YALI0A11157G, YALI0D09449G, YALI0B22572G, YALI0A12133G, YALI0E01782G, YALI0B16896G, YALI0E02552G	81	22	589	2.31369	0.999991	0.855406	55.6402
SP_PIR_KEYWORDS	hydrolase	33	5.03049	0.068379	YALI0C05599G, YALI0A11157G, YALI0D04961G, YALI0B08030G, YALI0F19448G, YALI0B09053G, YALI0D25718G, YALI0E10659G, YALI0B11968G, YALI0B05522G, YALI0B06963G, YALI0E01782G, YALI0A20350G, YALI0F10505G, YALI0C08701G, YALI0A06908G, YALI0F00396G, YALI0D26620G, YALI0A04939G, YALI0B22572G, YALI0B11352G, YALI0A12133G, YALI0E30965G, YALI0E02552G, YALI0D23661G, YALI0D09449G, YALI0A20834G, YALI0B22902G, YALI0E1…	650	243	6434	1.34424	0.999913	0.388644	56.2677
INTERPRO	IPR011545:DNA/RNA helicase, DEAD/DEAH box type, N-terminal	8	1.21951	0.08669	YALI0A11157G, YALI0D09449G, YALI0A04939G, YALI0B22572G, YALI0A12133G, YALI0E01782G, YALI0B16896G, YALI0E02552G	567	34	4938	2.04918	1	0.956871	75.844
UP_SEQ_FEATURE	short sequence motif:DEAD box	6	0.914634	0.142757	YALI0D09449G, YALI0B22572G, YALI0A12133G, YALI0E01782G, YALI0B16896G, YALI0E02552G	81	21	589	2.0776	1	0.978738	84.8683
Annotation Cluster 6	Enrichment Score: 1.8026454689597076
Category	Term	Count	%	PValue	Genes	List Total	Pop Hits	Pop Total	Fold Enrichment	Bonferroni	Benjamini	FDR
INTERPRO	IPR004038:Ribosomal protein L7Ae/L30e/S12e/Gadd45	5	0.762195	0.000777054	YALI0F24695G, YALI0E23562G, YALI0F06160G, YALI0F20768G, YALI0F24497G	567	5	4938	8.70899	0.516935	0.304972	1.21046
INTERPRO	IPR018492:Ribosomal protein L7A/RS6 family	3	0.457317	0.0363548	YALI0F24695G, YALI0F20768G, YALI0F24497G	567	3	4938	8.70899	1	0.838672	44.0193
INTERPRO	IPR004037:Ribosomal protein L7Ae conserved site	3	0.457317	0.0363548	YALI0F24695G, YALI0F20768G, YALI0F24497G	567	3	4938	8.70899	1	0.838672	44.0193
PIR_SUPERFAMILY	PIRSF002165:ribosomal protein, L7Ab/L7Aa/L7Ae/L8e types/H/ACA ribonucleoprotein complex, NHP2 subunit	3	0.457317	0.0599575	YALI0F24695G, YALI0F20768G, YALI0F24497G	188	3	1253	6.66489	0.999999	0.999999	54.4557
Annotation Cluster 7	Enrichment Score: 1.7973658209169487
Category	Term	Count	%	PValue	Genes	List Total	Pop Hits	Pop Total	Fold Enrichment	Bonferroni	Benjamini	FDR
INTERPRO	IPR002464:DNA/RNA helicase, ATP-dependent, DEAH-box type, conserved site	6	0.914634	0.0029924	YALI0D26620G, YALI0B11968G, YALI0D04961G, YALI0B11352G, YALI0B09053G, YALI0C23639G	567	10	4938	5.2254	0.939498	0.504046	4.58656
INTERPRO	IPR007502:Helicase-associated region	4	0.609756	0.0368079	YALI0D26620G, YALI0B11968G, YALI0B11352G, YALI0B09053G	567	7	4938	4.97657	1	0.827113	44.4303
INTERPRO	IPR011709:Region of unknown function DUF1605	4	0.609756	0.0368079	YALI0D26620G, YALI0B11968G, YALI0B11352G, YALI0B09053G	567	7	4938	4.97657	1	0.827113	44.4303
Annotation Cluster 8	Enrichment Score: 1.4786896325238859
Category	Term	Count	%	PValue	Genes	List Total	Pop Hits	Pop Total	Fold Enrichment	Bonferroni	Benjamini	FDR
GOTERM_BP_FAT	GO:0010608~posttranscriptional regulation of gene expression	5	0.762195	0.0114122	YALI0C00539G, YALI0F24013G, YALI0C06886G, YALI0B10582G, YALI0B03960G	294	8	2326	4.94473	0.992976	0.46195	14.9462
GOTERM_BP_FAT	GO:0006417~regulation of translation	4	0.609756	0.0469849	YALI0C00539G, YALI0F24013G, YALI0C06886G, YALI0B10582G	294	7	2326	4.52089	1	0.773494	49.2754
GOTERM_BP_FAT	GO:0032268~regulation of cellular protein metabolic process	4	0.609756	0.0683285	YALI0C00539G, YALI0F24013G, YALI0C06886G, YALI0B10582G	294	8	2326	3.95578	1	0.852057	63.1467
Annotation Cluster 9	Enrichment Score: 1.4448864042484086
Category	Term	Count	%	PValue	Genes	List Total	Pop Hits	Pop Total	Fold Enrichment	Bonferroni	Benjamini	FDR
SP_PIR_KEYWORDS	wd repeat	19	2.89634	0.00837926	YALI0A20614G, YALI0F12661G, YALI0F19558G, YALI0C23386G, YALI0C01738G, YALI0C00913G, YALI0F21747G, YALI0E20031G, YALI0F16115G, YALI0C22858G, YALI0C15653G, YALI0A04653G, YALI0D23001G, YALI0E28226G, YALI0C03377G, YALI0F08657G, YALI0A02695G, YALI0F07887G, YALI0B12320G	650	98	6434	1.91909	0.670679	0.0960442	9.35851
INTERPRO	IPR019782:WD40 repeat 2	18	2.7439	0.0182521	YALI0A20614G, YALI0F12661G, YALI0F19558G, YALI0C23386G, YALI0C01738G, YALI0C00913G, YALI0F21747G, YALI0E20031G, YALI0C22858G, YALI0C15653G, YALI0A04653G, YALI0E28226G, YALI0C03377G, YALI0D23001G, YALI0F08657G, YALI0A02695G, YALI0F07887G, YALI0B12320G	567	87	4938	1.80186	1	0.734541	25.0679
INTERPRO	IPR019781:WD40 repeat, subgroup	18	2.7439	0.0275292	YALI0A20614G, YALI0F12661G, YALI0F19558G, YALI0C23386G, YALI0C01738G, YALI0C00913G, YALI0F21747G, YALI0E20031G, YALI0C22858G, YALI0C15653G, YALI0A04653G, YALI0E28226G, YALI0C03377G, YALI0D23001G, YALI0F08657G, YALI0A02695G, YALI0F07887G, YALI0B12320G	567	91	4938	1.72266	1	0.824814	35.4244
INTERPRO	IPR017986:WD40 repeat, region	18	2.7439	0.0303202	YALI0A20614G, YALI0A21197G, YALI0F12661G, YALI0F19558G, YALI0C23386G, YALI0C01738G, YALI0C00913G, YALI0F21747G, YALI0E20031G, YALI0C22858G, YALI0C15653G, YALI0E28226G, YALI0C03377G, YALI0D23001G, YALI0F08657G, YALI0A02695G, YALI0F07887G, YALI0B12320G	567	92	4938	1.70393	1	0.816443	38.2676
SMART	SM00320:WD40	21	3.20122	0.0325871	YALI0A20614G, YALI0A21197G, YALI0F12661G, YALI0F19558G, YALI0C23386G, YALI0C01738G, YALI0C00913G, YALI0F21747G, YALI0E20031G, YALI0F16115G, YALI0C22858G, YALI0C15653G, YALI0A04653G, YALI0D23001G, YALI0E28226G, YALI0C03377G, YALI0A02695G, YALI0F08657G, YALI0F07887G, YALI0B16654G, YALI0B12320G	178	114	1528	1.58131	0.963593	0.424298	30.7689
INTERPRO	IPR001680:WD40 repeat	21	3.20122	0.0331642	YALI0A20614G, YALI0A21197G, YALI0F12661G, YALI0F19558G, YALI0C23386G, YALI0C01738G, YALI0C00913G, YALI0F21747G, YALI0E20031G, YALI0F16115G, YALI0C22858G, YALI0C15653G, YALI0A04653G, YALI0D23001G, YALI0E28226G, YALI0C03377G, YALI0A02695G, YALI0F08657G, YALI0F07887G, YALI0B16654G, YALI0B12320G	567	114	4938	1.60429	1	0.826882	41.0439
INTERPRO	IPR015943:WD40/YVTN repeat-like	21	3.20122	0.0390517	YALI0A20614G, YALI0A21197G, YALI0F12661G, YALI0F19558G, YALI0C23386G, YALI0C01738G, YALI0C00913G, YALI0F21747G, YALI0E20031G, YALI0F16115G, YALI0C22858G, YALI0C15653G, YALI0A04653G, YALI0D23001G, YALI0E28226G, YALI0C03377G, YALI0A02695G, YALI0F08657G, YALI0F07887G, YALI0B16654G, YALI0B12320G	567	116	4938	1.57663	1	0.830599	46.424
INTERPRO	IPR019775:WD40 repeat, conserved site	10	1.52439	0.512282	YALI0C22858G, YALI0F12661G, YALI0C00913G, YALI0F21747G, YALI0C03377G, YALI0E28226G, YALI0A02695G, YALI0E20031G, YALI0B12320G, YALI0F16115G	567	76	4938	1.14592	1	1	99.9987
Annotation Cluster 10	Enrichment Score: 1.4111279354129491
Category	Term	Count	%	PValue	Genes	List Total	Pop Hits	Pop Total	Fold Enrichment	Bonferroni	Benjamini	FDR
GOTERM_MF_FAT	GO:0003777~microtubule motor activity	6	0.914634	0.00805838	YALI0E07491G, YALI0E10879G, YALI0F14179G, YALI0F02673G, YALI0F27027G, YALI0E32857G	348	11	2705	4.23981	0.900335	0.226025	10.1721
INTERPRO	IPR001752:Kinesin, motor region	5	0.762195	0.0134171	YALI0E07491G, YALI0E10879G, YALI0F14179G, YALI0F02673G, YALI0F27027G	567	9	4938	4.83833	0.999997	0.683173	19.0729
SMART	SM00129:KISc	5	0.762195	0.0137258	YALI0E07491G, YALI0E10879G, YALI0F14179G, YALI0F02673G, YALI0F27027G	178	9	1528	4.76904	0.748945	0.292149	14.2216
GOTERM_BP_FAT	GO:0007018~microtubule-based movement	6	0.914634	0.0167091	YALI0E07491G, YALI0E10879G, YALI0F14179G, YALI0F02673G, YALI0F27027G, YALI0E32857G	294	13	2326	3.65149	0.99931	0.554614	21.1529
SP_PIR_KEYWORDS	microtubule	7	1.06707	0.0187572	YALI0E07491G, YALI0E10879G, YALI0F14179G, YALI0B07381G, YALI0E27071G, YALI0F02673G, YALI0F27027G	650	22	6434	3.14951	0.917871	0.188028	19.8372
GOTERM_BP_FAT	GO:0007017~microtubule-based process	7	1.06707	0.024658	YALI0E07491G, YALI0E10879G, YALI0F14179G, YALI0B07381G, YALI0F02673G, YALI0F27027G, YALI0E32857G	294	19	2326	2.91479	0.999979	0.659921	29.6819
SP_PIR_KEYWORDS	motor protein	5	0.762195	0.0262586	YALI0E07491G, YALI0E10879G, YALI0F14179G, YALI0F02673G, YALI0F27027G	650	12	6434	4.12436	0.970176	0.236765	26.7083
GOTERM_CC_FAT	GO:0015630~microtubule cytoskeleton	9	1.37195	0.0495268	YALI0E07491G, YALI0E34375G, YALI0E10879G, YALI0F14179G, YALI0B07381G, YALI0E27071G, YALI0F02673G, YALI0F27027G, YALI0E32857G	155	30	1090	2.10968	0.995173	0.486594	43.3892
INTERPRO	IPR019821:Kinesin, motor region, conserved site	4	0.609756	0.0539801	YALI0E07491G, YALI0F14179G, YALI0F02673G, YALI0F27027G	567	8	4938	4.3545	1	0.895469	58.078
GOTERM_MF_FAT	GO:0003774~motor activity	6	0.914634	0.0702108	YALI0E07491G, YALI0E10879G, YALI0F14179G, YALI0F02673G, YALI0F27027G, YALI0E32857G	348	18	2705	2.591	1	0.664442	61.9086
GOTERM_CC_FAT	GO:0005874~microtubule	7	1.06707	0.0928183	YALI0E07491G, YALI0E10879G, YALI0F14179G, YALI0B07381G, YALI0E27071G, YALI0F02673G, YALI0F27027G	155	23	1090	2.14025	0.999964	0.640425	66.4167
GOTERM_CC_FAT	GO:0044430~cytoskeletal part	10	1.52439	0.207768	YALI0E07491G, YALI0E34375G, YALI0E10879G, YALI0F14179G, YALI0C04774G, YALI0B07381G, YALI0E27071G, YALI0F02673G, YALI0F27027G, YALI0E32857G	155	47	1090	1.49623	1	0.825662	92.6376
GOTERM_CC_FAT	GO:0005856~cytoskeleton	10	1.52439	0.414813	YALI0E07491G, YALI0E34375G, YALI0E10879G, YALI0F14179G, YALI0C04774G, YALI0B07381G, YALI0E27071G, YALI0F02673G, YALI0F27027G, YALI0E32857G	155	57	1090	1.23373	1	0.970292	99.7526
Annotation Cluster 11	Enrichment Score: 1.3079218459608872
Category	Term	Count	%	PValue	Genes	List Total	Pop Hits	Pop Total	Fold Enrichment	Bonferroni	Benjamini	FDR
GOTERM_MF_FAT	GO:0008094~DNA-dependent ATPase activity	7	1.06707	0.00773356	YALI0C08701G, YALI0E33377G, YALI0E10747G, YALI0F07337G, YALI0A02068G, YALI0B06897G, YALI0C23639G	348	15	2705	3.62739	0.890588	0.241626	9.78131
GOTERM_MF_FAT	GO:0004003~ATP-dependent DNA helicase activity	4	0.609756	0.0974467	YALI0C08701G, YALI0E33377G, YALI0B06897G, YALI0C23639G	348	9	2705	3.45466	1	0.751284	74.3174
GOTERM_MF_FAT	GO:0003678~DNA helicase activity	4	0.609756	0.158157	YALI0C08701G, YALI0E33377G, YALI0B06897G, YALI0C23639G	348	11	2705	2.82654	1	0.859513	89.7981

## Sheet:  upc2Δ Hypox-v-Wildtype Hypox
Gene enrichment in upc2 cells compared to wildtype cells growing in hypoxia
Upregulated genes
Annotation Cluster 1	Enrichment Score: 2.9277116537514543
Category	Term	Count	%	PValue	Genes	List Total	Pop Hits	Pop Total	Fold Enrichment	Bonferroni	Benjamini	FDR
GOTERM_BP_FAT	GO:0006508~proteolysis	40	5.34045	5.39515e-05	YALI0F11033G, YALI0B01386G, YALI0B06754G, YALI0B16500G, YALI0B02794G, YALI0E24453G, YALI0E05423G, YALI0E17831G, YALI0C23661G, YALI0B14597G, YALI0A02607G, YALI0C08899G, YALI0B09427G, YALI0C20691G, YALI0E11715G, YALI0F09163G, YALI0F23595G, YALI0C20207G, YALI0D14300G, YALI0B05258G, YALI0F07667G, YALI0B14267G, YALI0F05940G, YALI0B05940G, YALI0A05533G, YALI0E33363G, YALI0B13310G, YALI0F05764G, YALI0A2…	228	216	2326	1.88921	0.0181768	0.0181768	0.0734453
GOTERM_MF_FAT	GO:0008233~peptidase activity	35	4.6729	0.000187161	YALI0F11033G, YALI0B01386G, YALI0B06754G, YALI0B16500G, YALI0B02794G, YALI0E05423G, YALI0E17831G, YALI0C23661G, YALI0B14597G, YALI0A02607G, YALI0C08899G, YALI0B09427G, YALI0C20691G, YALI0E11715G, YALI0F09163G, YALI0F23595G, YALI0D14300G, YALI0B05258G, YALI0F07667G, YALI0A13277G, YALI0B14267G, YALI0F11077G, YALI0F05940G, YALI0A05533G, YALI0E33363G, YALI0B13310G, YALI0F10769G, YALI0A13013G, YALI0B0…	285	175	2705	1.89825	0.0542522	0.0542522	0.24956
GOTERM_MF_FAT	GO:0070011~peptidase activity, acting on L-amino acid peptides	33	4.40587	0.0003033	YALI0F11033G, YALI0B01386G, YALI0B06754G, YALI0B16500G, YALI0B02794G, YALI0E05423G, YALI0E17831G, YALI0C23661G, YALI0B14597G, YALI0A02607G, YALI0C08899G, YALI0B09427G, YALI0C20691G, YALI0E11715G, YALI0F09163G, YALI0F23595G, YALI0D14300G, YALI0F07667G, YALI0A13277G, YALI0B14267G, YALI0F11077G, YALI0F05940G, YALI0A05533G, YALI0E33363G, YALI0B13310G, YALI0F10769G, YALI0A13013G, YALI0B05654G, YALI0B0…	285	165	2705	1.89825	0.0864316	0.0441923	0.404129
GOTERM_MF_FAT	GO:0004175~endopeptidase activity	23	3.07076	0.00259952	YALI0F23595G, YALI0F11033G, YALI0B01386G, YALI0D14300G, YALI0F07667G, YALI0B06754G, YALI0B14267G, YALI0F11077G, YALI0B16500G, YALI0F05940G, YALI0A05533G, YALI0B02794G, YALI0E33363G, YALI0E05423G, YALI0E17831G, YALI0A13013G, YALI0B05654G, YALI0C08899G, YALI0F25091G, YALI0E11715G, YALI0C20691G, YALI0F09163G, YALI0B11374G	285	113	2705	1.93184	0.539602	0.227833	3.41504
SP_PIR_KEYWORDS	Protease	12	1.60214	0.288707	YALI0F23595G, YALI0E05423G, YALI0D14300G, YALI0F10769G, YALI0F07667G, YALI0B14597G, YALI0B05654G, YALI0A13277G, YALI0C08899G, YALI0B16500G, YALI0C20691G, YALI0E33363G	736	79	6434	1.32788	1	0.982046	97.9733
Annotation Cluster 2	Enrichment Score: 1.8807342307647987
Category	Term	Count	%	PValue	Genes	List Total	Pop Hits	Pop Total	Fold Enrichment	Bonferroni	Benjamini	FDR
GOTERM_CC_FAT	GO:0005777~peroxisome	11	1.46862	2.44678e-06	YALI0C01023G, YALI0F01012G, YALI0F22539G, YALI0E27654G, YALI0C23859G, YALI0F10857G, YALI0E06567G, YALI0F28457G, YALI0E09405G, YALI0E18568G, YALI0D00891G	86	23	1090	6.06168	0.000229971	0.000229971	0.00268406
GOTERM_CC_FAT	GO:0042579~microbody	11	1.46862	2.44678e-06	YALI0C01023G, YALI0F01012G, YALI0F22539G, YALI0E27654G, YALI0C23859G, YALI0F10857G, YALI0E06567G, YALI0F28457G, YALI0E09405G, YALI0E18568G, YALI0D00891G	86	23	1090	6.06168	0.000229971	0.000229971	0.00268406
GOTERM_BP_FAT	GO:0016042~lipid catabolic process	9	1.2016	0.000212598	YALI0F10010G, YALI0E27654G, YALI0C23859G, YALI0B08030G, YALI0F10857G, YALI0E06567G, YALI0F06358G, YALI0D08206G, YALI0F19228G	228	19	2326	4.83241	0.06974	0.0355001	0.289125
INTERPRO	IPR013764:Acyl-CoA oxidase/dehydrogenase, type1/2, C-terminal	6	0.801068	0.00333176	YALI0E27654G, YALI0C23859G, YALI0C16797G, YALI0F10857G, YALI0E06567G, YALI0B04906G	518	11	4938	5.19972	0.897653	0.897653	4.89258
GOTERM_BP_FAT	GO:0044242~cellular lipid catabolic process	6	0.801068	0.00378118	YALI0E27654G, YALI0C23859G, YALI0F10857G, YALI0E06567G, YALI0D08206G, YALI0F19228G	228	12	2326	5.10088	0.724188	0.349065	5.02809
SP_PIR_KEYWORDS	peroxisome	6	0.801068	0.00764077	YALI0F01012G, YALI0F22539G, YALI0F10857G, YALI0F28457G, YALI0E18568G, YALI0D00891G	736	12	6434	4.37092	0.595488	0.595488	8.40373
PIR_SUPERFAMILY	PIRSF000168:Acyl-CoA_oxidase	4	0.534045	0.0128724	YALI0E27654G, YALI0C23859G, YALI0F10857G, YALI0E06567G	118	6	1253	7.0791	0.799419	0.799419	13.8955
GOTERM_BP_FAT	GO:0034440~lipid oxidation	4	0.534045	0.0146815	YALI0E27654G, YALI0C23859G, YALI0F10857G, YALI0E06567G	228	6	2326	6.80117	0.993453	0.634226	18.2424
GOTERM_BP_FAT	GO:0006635~fatty acid beta-oxidation	4	0.534045	0.0146815	YALI0E27654G, YALI0C23859G, YALI0F10857G, YALI0E06567G	228	6	2326	6.80117	0.993453	0.634226	18.2424
GOTERM_BP_FAT	GO:0009062~fatty acid catabolic process	4	0.534045	0.0146815	YALI0E27654G, YALI0C23859G, YALI0F10857G, YALI0E06567G	228	6	2326	6.80117	0.993453	0.634226	18.2424
GOTERM_BP_FAT	GO:0019395~fatty acid oxidation	4	0.534045	0.0146815	YALI0E27654G, YALI0C23859G, YALI0F10857G, YALI0E06567G	228	6	2326	6.80117	0.993453	0.634226	18.2424
INTERPRO	IPR006091:Acyl-CoA oxidase/dehydrogenase, central region	5	0.667557	0.0149059	YALI0E27654G, YALI0C23859G, YALI0C16797G, YALI0F10857G, YALI0E06567G	518	10	4938	4.76641	0.999965	0.871454	20.2072
INTERPRO	IPR006090:Acyl-CoA oxidase/dehydrogenase, type 1	5	0.667557	0.0149059	YALI0C23859G, YALI0C16797G, YALI0F10857G, YALI0E06567G, YALI0B04906G	518	10	4938	4.76641	0.999965	0.871454	20.2072
INTERPRO	IPR013786:Acyl-CoA dehydrogenase/oxidase, N-terminal	5	0.667557	0.0149059	YALI0E27654G, YALI0C23859G, YALI0C16797G, YALI0F10857G, YALI0E06567G	518	10	4938	4.76641	0.999965	0.871454	20.2072
GOTERM_MF_FAT	GO:0003995~acyl-CoA dehydrogenase activity	5	0.667557	0.0149653	YALI0E27654G, YALI0C23859G, YALI0C16797G, YALI0F10857G, YALI0E06567G	285	10	2705	4.74561	0.988817	0.674808	18.2322
GOTERM_BP_FAT	GO:0030258~lipid modification	5	0.667557	0.016795	YALI0E27654G, YALI0C23859G, YALI0F09559G, YALI0F10857G, YALI0E06567G	228	11	2326	4.63716	0.996845	0.560749	20.5986
INTERPRO	IPR002655:Acyl-CoA oxidase, C-terminal	4	0.534045	0.0179154	YALI0E27654G, YALI0C23859G, YALI0F10857G, YALI0E06567G	518	6	4938	6.35521	0.999996	0.872273	23.7939
INTERPRO	IPR012258:Acyl-CoA oxidase	4	0.534045	0.0179154	YALI0E27654G, YALI0C23859G, YALI0F10857G, YALI0E06567G	518	6	4938	6.35521	0.999996	0.872273	23.7939
GOTERM_MF_FAT	GO:0003997~acyl-CoA oxidase activity	4	0.534045	0.0179951	YALI0E27654G, YALI0C23859G, YALI0F10857G, YALI0E06567G	285	6	2705	6.32749	0.995534	0.5942	21.5266
GOTERM_BP_FAT	GO:0046395~carboxylic acid catabolic process	5	0.667557	0.050941	YALI0E09603G, YALI0E27654G, YALI0C23859G, YALI0F10857G, YALI0E06567G	228	15	2326	3.40058	1	0.830968	50.9338
GOTERM_BP_FAT	GO:0016054~organic acid catabolic process	5	0.667557	0.050941	YALI0E09603G, YALI0E27654G, YALI0C23859G, YALI0F10857G, YALI0E06567G	228	15	2326	3.40058	1	0.830968	50.9338
GOTERM_MF_FAT	GO:0016634~oxidoreductase activity, acting on the CH-CH group of donors, oxygen as acceptor	4	0.534045	0.0595706	YALI0E27654G, YALI0C23859G, YALI0F10857G, YALI0E06567G	285	9	2705	4.21832	1	0.755345	55.9525
GOTERM_BP_FAT	GO:0007031~peroxisome organization	4	0.534045	0.0657025	YALI0C01023G, YALI0F01012G, YALI0F22539G, YALI0D00891G	228	10	2326	4.0807	1	0.877616	60.3656
PIR_SUPERFAMILY	PIRSF000168:acyl-CoA oxidase	3	0.400534	0.0716702	YALI0E27654G, YALI0C23859G, YALI0F10857G	118	5	1253	6.37119	0.999901	0.990056	57.6314
GOTERM_BP_FAT	GO:0006631~fatty acid metabolic process	5	0.667557	0.266588	YALI0E27654G, YALI0C23859G, YALI0F10857G, YALI0E06567G, YALI0E18568G	228	27	2326	1.88921	1	0.989779	98.5333
GOTERM_MF_FAT	GO:0050660~FAD binding	7	0.934579	0.391084	YALI0E27654G, YALI0C23859G, YALI0C16797G, YALI0F10857G, YALI0E06567G, YALI0B13046G, YALI0B14014G	285	48	2705	1.38414	1	0.977416	99.867
GOTERM_MF_FAT	GO:0050662~coenzyme binding	12	1.60214	0.880708	YALI0F09075G, YALI0F09966G, YALI0E27654G, YALI0B02948G, YALI0C23859G, YALI0C16797G, YALI0F10857G, YALI0E06567G, YALI0F11583G, YALI0B13046G, YALI0B04356G, YALI0B14014G	285	139	2705	0.819387	1	0.99983	100
GOTERM_MF_FAT	GO:0048037~cofactor binding	16	2.13618	0.927987	YALI0C16797G, YALI0F11583G, YALI0B16214G, YALI0B13046G, YALI0C18315G, YALI0F09075G, YALI0F09966G, YALI0E27654G, YALI0C23859G, YALI0B02948G, YALI0E06567G, YALI0F10857G, YALI0C05709G, YALI0B04356G, YALI0C22792G, YALI0B14014G	285	194	2705	0.782782	1	0.999951	100
Annotation Cluster 3	Enrichment Score: 1.4019819511054474
Category	Term	Count	%	PValue	Genes	List Total	Pop Hits	Pop Total	Fold Enrichment	Bonferroni	Benjamini	FDR
GOTERM_BP_FAT	GO:0006071~glycerol metabolic process	4	0.534045	0.0354735	YALI0B02948G, YALI0E32791G, YALI0E20691G, YALI0F01606G	228	8	2326	5.10088	0.999995	0.784547	38.8505
GOTERM_BP_FAT	GO:0019400~alditol metabolic process	4	0.534045	0.0354735	YALI0B02948G, YALI0E32791G, YALI0E20691G, YALI0F01606G	228	8	2326	5.10088	0.999995	0.784547	38.8505
GOTERM_BP_FAT	GO:0019751~polyol metabolic process	4	0.534045	0.0494592	YALI0B02948G, YALI0E32791G, YALI0E20691G, YALI0F01606G	228	9	2326	4.53411	1	0.852842	49.8802
Downregulated genes
Annotation Cluster 1	Enrichment Score: 23.324651470568877
Category	Term	Count	%	PValue	Genes	List Total	Pop Hits	Pop Total	Fold Enrichment	Bonferroni	Benjamini	FDR
GOTERM_MF_FAT	GO:0003735~structural constituent of ribosome	63	13.4328	1.05646e-35	YALI0C09218G, YALI0D21626G, YALI0D24387G, YALI0E23562G, YALI0D12771G, YALI0E12353G, YALI0D05753G, YALI0B21076G, YALI0E00550G, YALI0B20504G, YALI0F05522G, YALI0F25531G, YALI0E25025G, YALI0E29073G, YALI0A10725G, YALI0F24365G, YALI0F24739G, YALI0E21219G, YALI0E27830G, YALI0C06820G, YALI0D10263G, YALI0E13618G, YALI0A20746G, YALI0D13882G, YALI0E32208G, YALI0E31911G, YALI0F05544G, YALI0A09922G, YALI0B1…	243	121	2705	5.79584	2.74679e-33	2.74679e-33	1.3809e-32
KEGG_PATHWAY	yli03010:Ribosome	55	11.7271	4.61125e-32	YALI0D24387G, YALI0C09218G, YALI0E23562G, YALI0B21076G, YALI0E00550G, YALI0B20504G, YALI0F05522G, YALI0C11473G, YALI0F25531G, YALI0E25025G, YALI0E29073G, YALI0A10725G, YALI0F24739G, YALI0E21219G, YALI0E27830G, YALI0C06820G, YALI0D10263G, YALI0E13618G, YALI0A20746G, YALI0D13882G, YALI0E31911G, YALI0F05544G, YALI0A09922G, YALI0B15103G, YALI0D13728G, YALI0E22352G, YALI0F05676G, YALI0F25399G, YALI0E1…	160	79	1167	5.07793	2.67452e-30	2.67452e-30	4.58789e-29
GOTERM_MF_FAT	GO:0005198~structural molecule activity	63	13.4328	1.14796e-31	YALI0C09218G, YALI0D21626G, YALI0D24387G, YALI0E23562G, YALI0D12771G, YALI0E12353G, YALI0D05753G, YALI0B21076G, YALI0E00550G, YALI0B20504G, YALI0F05522G, YALI0F25531G, YALI0E25025G, YALI0E29073G, YALI0A10725G, YALI0F24365G, YALI0F24739G, YALI0E21219G, YALI0E27830G, YALI0C06820G, YALI0D10263G, YALI0E13618G, YALI0A20746G, YALI0D13882G, YALI0E32208G, YALI0E31911G, YALI0F05544G, YALI0A09922G, YALI0B1…	243	137	2705	5.11895	2.9847e-29	1.49235e-29	1.50051e-28
GOTERM_CC_FAT	GO:0005840~ribosome	65	13.8593	2.6928e-31	YALI0C09218G, YALI0D21626G, YALI0D24387G, YALI0E23562G, YALI0D12771G, YALI0E12353G, YALI0D05753G, YALI0B21076G, YALI0E00550G, YALI0B20504G, YALI0F05522G, YALI0F25531G, YALI0E25025G, YALI0E29073G, YALI0A10725G, YALI0F24365G, YALI0F24739G, YALI0E21219G, YALI0E27830G, YALI0C06820G, YALI0D03916G, YALI0D10263G, YALI0E13618G, YALI0A20746G, YALI0D13882G, YALI0E32208G, YALI0E31911G, YALI0F05544G, YALI0A0…	136	125	1090	4.16765	2.18117e-29	2.18117e-29	2.8698e-28
GOTERM_BP_FAT	GO:0006412~translation	69	14.7122	1.11207e-23	YALI0C09218G, YALI0D21626G, YALI0D24387G, YALI0E23562G, YALI0D12771G, YALI0E12353G, YALI0D05753G, YALI0E04246G, YALI0B21076G, YALI0E00550G, YALI0B20504G, YALI0F21153G, YALI0F05522G, YALI0F25531G, YALI0E25025G, YALI0E29073G, YALI0A10725G, YALI0F24365G, YALI0F24739G, YALI0E21219G, YALI0E27830G, YALI0C06820G, YALI0D10263G, YALI0E13618G, YALI0A20746G, YALI0D13882G, YALI0E32208G, YALI0E31911G, YALI0C1…	224	204	2326	3.51221	4.57061e-21	4.57061e-21	1.55725e-20
GOTERM_CC_FAT	GO:0030529~ribonucleoprotein complex	67	14.2857	2.6742e-22	YALI0C09218G, YALI0D21626G, YALI0D24387G, YALI0E23562G, YALI0D12771G, YALI0E12353G, YALI0D05753G, YALI0B21076G, YALI0E00550G, YALI0B20504G, YALI0F05522G, YALI0F25531G, YALI0E25025G, YALI0E29073G, YALI0A10725G, YALI0F24365G, YALI0F24739G, YALI0E21219G, YALI0E27830G, YALI0C06820G, YALI0D03916G, YALI0D10263G, YALI0F20768G, YALI0E13618G, YALI0A20746G, YALI0D13882G, YALI0E32208G, YALI0E31911G, YALI0F0…	136	176	1090	3.05105	2.1661e-20	1.08305e-20	2.84998e-19
SP_PIR_KEYWORDS	ribosomal protein	31	6.60981	5.38099e-20	YALI0D24387G, YALI0C09218G, YALI0E31911G, YALI0E23562G, YALI0F05544G, YALI0D05753G, YALI0D13728G, YALI0E30602G, YALI0F05676G, YALI0F25399G, YALI0F05803G, YALI0C15895G, YALI0E23584G, YALI0F06160G, YALI0F20482G, YALI0F25531G, YALI0D20614G, YALI0C21560G, YALI0E27830G, YALI0D12903G, YALI0D01804G, YALI0D22088G, YALI0E23694G, YALI0D03916G, YALI0D05731G, YALI0D10263G, YALI0E13618G, YALI0F18766G, YALI0A2…	467	57	6434	7.49292	7.21053e-18	7.21053e-18	6.30023e-17
SP_PIR_KEYWORDS	ribonucleoprotein	31	6.60981	1.88591e-17	YALI0D24387G, YALI0C09218G, YALI0E31911G, YALI0E23562G, YALI0F05544G, YALI0D05753G, YALI0D13728G, YALI0E30602G, YALI0F05676G, YALI0F25399G, YALI0F05803G, YALI0C15895G, YALI0E23584G, YALI0F06160G, YALI0F20482G, YALI0F25531G, YALI0D20614G, YALI0C21560G, YALI0E27830G, YALI0D12903G, YALI0D01804G, YALI0D22088G, YALI0E23694G, YALI0D03916G, YALI0D05731G, YALI0D10263G, YALI0E13618G, YALI0F18766G, YALI0A2…	467	67	6434	6.37457	2.52711e-15	1.26356e-15	2.20808e-14
GOTERM_CC_FAT	GO:0043232~intracellular non-membrane-bounded organelle	73	15.565	3.53173e-13	YALI0C09218G, YALI0D21626G, YALI0D24387G, YALI0E23562G, YALI0D12771G, YALI0E12353G, YALI0F19162G, YALI0D05753G, YALI0B21076G, YALI0A17061G, YALI0E00550G, YALI0B17380G, YALI0B20504G, YALI0F05522G, YALI0C20735G, YALI0E25025G, YALI0F25531G, YALI0E29073G, YALI0A10725G, YALI0F24365G, YALI0F24739G, YALI0E21219G, YALI0E27830G, YALI0C06820G, YALI0D03916G, YALI0F20856G, YALI0D10263G, YALI0E13618G, YALI0A2…	136	284	1090	2.06012	2.86061e-11	9.53537e-12	3.76377e-10
GOTERM_CC_FAT	GO:0043228~non-membrane-bounded organelle	73	15.565	3.53173e-13	YALI0C09218G, YALI0D21626G, YALI0D24387G, YALI0E23562G, YALI0D12771G, YALI0E12353G, YALI0F19162G, YALI0D05753G, YALI0B21076G, YALI0A17061G, YALI0E00550G, YALI0B17380G, YALI0B20504G, YALI0F05522G, YALI0C20735G, YALI0E25025G, YALI0F25531G, YALI0E29073G, YALI0A10725G, YALI0F24365G, YALI0F24739G, YALI0E21219G, YALI0E27830G, YALI0C06820G, YALI0D03916G, YALI0F20856G, YALI0D10263G, YALI0E13618G, YALI0A2…	136	284	1090	2.06012	2.86061e-11	9.53537e-12	3.76377e-10
Annotation Cluster 2	Enrichment Score: 2.100857115795718
Category	Term	Count	%	PValue	Genes	List Total	Pop Hits	Pop Total	Fold Enrichment	Bonferroni	Benjamini	FDR
SP_PIR_KEYWORDS	amino-acid biosynthesis	8	1.70576	0.000653935	YALI0D22847G, YALI0B15444G, YALI0F31075G, YALI0F19910G, YALI0D17930G, YALI0F14047G, YALI0D01089G, YALI0C00407G	467	22	6434	5.00993	0.083924	0.0216756	0.762972
GOTERM_BP_FAT	GO:0046394~carboxylic acid biosynthetic process	17	3.62473	0.00558201	YALI0B15444G, YALI0F31075G, YALI0F19910G, YALI0D24629G, YALI0E06457G, YALI0E33957G, YALI0C00407G, YALI0D22847G, YALI0D20878G, YALI0D17930G, YALI0F11297G, YALI0B20020G, YALI0D03135G, YALI0F14047G, YALI0F05214G, YALI0D01089G, YALI0C19624G	224	85	2326	2.07679	0.899804	0.280113	7.53911
GOTERM_BP_FAT	GO:0016053~organic acid biosynthetic process	17	3.62473	0.00558201	YALI0B15444G, YALI0F31075G, YALI0F19910G, YALI0D24629G, YALI0E06457G, YALI0E33957G, YALI0C00407G, YALI0D22847G, YALI0D20878G, YALI0D17930G, YALI0F11297G, YALI0B20020G, YALI0D03135G, YALI0F14047G, YALI0F05214G, YALI0D01089G, YALI0C19624G	224	85	2326	2.07679	0.899804	0.280113	7.53911
GOTERM_BP_FAT	GO:0044271~nitrogen compound biosynthetic process	27	5.75693	0.00778334	YALI0B15444G, YALI0B21527G, YALI0F21527G, YALI0D17490G, YALI0E06457G, YALI0D22022G, YALI0D06501G, YALI0D00583G, YALI0C15554G, YALI0F03179G, YALI0F19998G, YALI0D03135G, YALI0F20790G, YALI0F31075G, YALI0F19910G, YALI0D12584G, YALI0F20306G, YALI0A12045G, YALI0E32164G, YALI0E33957G, YALI0C00407G, YALI0D22847G, YALI0D17930G, YALI0B20020G, YALI0F02893G, YALI0F14047G, YALI0D01089G	224	168	2326	1.66885	0.959703	0.33064	10.3644
GOTERM_BP_FAT	GO:0008652~cellular amino acid biosynthetic process	12	2.55864	0.0340303	YALI0D22847G, YALI0B15444G, YALI0F31075G, YALI0F19910G, YALI0D17930G, YALI0B20020G, YALI0D03135G, YALI0F14047G, YALI0E06457G, YALI0D01089G, YALI0E33957G, YALI0C00407G	224	63	2326	1.97789	0.999999	0.612742	38.4196
GOTERM_BP_FAT	GO:0009309~amine biosynthetic process	12	2.55864	0.045995	YALI0D22847G, YALI0B15444G, YALI0F31075G, YALI0F19910G, YALI0D17930G, YALI0B20020G, YALI0D03135G, YALI0F14047G, YALI0E06457G, YALI0D01089G, YALI0E33957G, YALI0C00407G	224	66	2326	1.88799	1	0.65875	48.2816
Annotation Cluster 3	Enrichment Score: 1.9380244737913919
Category	Term	Count	%	PValue	Genes	List Total	Pop Hits	Pop Total	Fold Enrichment	Bonferroni	Benjamini	FDR
INTERPRO	IPR001804:Isocitrate/isopropylmalate dehydrogenase	4	0.852878	0.00466217	YALI0D10593G, YALI0E05137G, YALI0D06303G, YALI0C00407G	401	5	4938	9.85137	0.952045	0.532041	6.7395
INTERPRO	IPR019818:Isocitrate/isopropylmalate dehydrogenase, conserved site	4	0.852878	0.00466217	YALI0D10593G, YALI0E05137G, YALI0D06303G, YALI0C00407G	401	5	4938	9.85137	0.952045	0.532041	6.7395
GOTERM_MF_FAT	GO:0051287~NAD or NADH binding	9	1.91898	0.00850545	YALI0C14344G, YALI0A12353G, YALI0E18634G, YALI0B21670G, YALI0D10593G, YALI0E05137G, YALI0D06303G, YALI0C06369G, YALI0C00407G	243	34	2705	2.94662	0.891486	0.218675	10.5644
GOTERM_MF_FAT	GO:0000287~magnesium ion binding	9	1.91898	0.0957257	YALI0D10131G, YALI0C18535G, YALI0F13541G, YALI0F19448G, YALI0D10593G, YALI0E05137G, YALI0E02244G, YALI0D06303G, YALI0C00407G	243	53	2705	1.89029	1	0.78539	73.1592
Annotation Cluster 4	Enrichment Score: 1.7636623079690925
Category	Term	Count	%	PValue	Genes	List Total	Pop Hits	Pop Total	Fold Enrichment	Bonferroni	Benjamini	FDR
KEGG_PATHWAY	yli00100:Steroid biosynthesis	9	1.91898	0.000146206	YALI0D20878G, YALI0B17204G, YALI0B23298G, YALI0E32065G, YALI0F11297G, YALI0E15730G, YALI0D19206G, YALI0F08701G, YALI0B17644G	160	14	1167	4.68884	0.00844471	0.0042313	0.14537
GOTERM_BP_FAT	GO:0006694~steroid biosynthetic process	4	0.852878	0.0227415	YALI0B17204G, YALI0E32065G, YALI0F08701G, YALI0B17644G	224	7	2326	5.93367	0.999922	0.576633	27.5395
GOTERM_BP_FAT	GO:0016126~sterol biosynthetic process	3	0.639659	0.075338	YALI0B17204G, YALI0E32065G, YALI0F08701G	224	5	2326	6.23036	1	0.710086	66.607
GOTERM_BP_FAT	GO:0016125~sterol metabolic process	3	0.639659	0.075338	YALI0B17204G, YALI0E32065G, YALI0F08701G	224	5	2326	6.23036	1	0.710086	66.607
GOTERM_BP_FAT	GO:0008202~steroid metabolic process	4	0.852878	0.0805149	YALI0B17204G, YALI0E32065G, YALI0F08701G, YALI0B17644G	224	11	2326	3.77597	1	0.721343	69.1317
Annotation Cluster 5	Enrichment Score: 1.6041364118090773
Category	Term	Count	%	PValue	Genes	List Total	Pop Hits	Pop Total	Fold Enrichment	Bonferroni	Benjamini	FDR
GOTERM_BP_FAT	GO:0045454~cell redox homeostasis	7	1.49254	0.0181521	YALI0E25091G, YALI0E18029G, YALI0F08195G, YALI0B15125G, YALI0F30899G, YALI0C21043G, YALI0A19426G	224	23	2326	3.16033	0.999463	0.529005	22.6262
INTERPRO	IPR019479:Peroxiredoxin, C-terminal	3	0.639659	0.0185842	YALI0F08195G, YALI0B15125G, YALI0A19426G	401	3	4938	12.3142	0.999995	0.912724	24.4285
INTERPRO	IPR012335:Thioredoxin fold	8	1.70576	0.0200182	YALI0E25091G, YALI0F08195G, YALI0C21021G, YALI0B15125G, YALI0F30899G, YALI0C21043G, YALI0A19426G, YALI0A06743G	401	35	4938	2.81468	0.999998	0.888155	26.0605
GOTERM_BP_FAT	GO:0019725~cellular homeostasis	7	1.49254	0.0270869	YALI0E25091G, YALI0E18029G, YALI0F08195G, YALI0B15125G, YALI0F30899G, YALI0C21043G, YALI0A19426G	224	25	2326	2.9075	0.999987	0.609577	31.9232
INTERPRO	IPR017936:Thioredoxin-like	5	1.0661	0.0282335	YALI0E25091G, YALI0F08195G, YALI0B15125G, YALI0C21043G, YALI0A19426G	401	15	4938	4.10474	1	0.93001	34.794
GOTERM_BP_FAT	GO:0042592~homeostatic process	7	1.49254	0.0324844	YALI0E25091G, YALI0E18029G, YALI0F08195G, YALI0B15125G, YALI0F30899G, YALI0C21043G, YALI0A19426G	224	26	2326	2.79567	0.999999	0.647977	37.0252
INTERPRO	IPR000866:Alkyl hydroperoxide reductase/ Thiol specific antioxidant/ Mal allergen	3	0.639659	0.0351843	YALI0F08195G, YALI0B15125G, YALI0A19426G	401	4	4938	9.23566	1	0.924745	41.4214
Annotation Cluster 6	Enrichment Score: 1.5900756214377778
Category	Term	Count	%	PValue	Genes	List Total	Pop Hits	Pop Total	Fold Enrichment	Bonferroni	Benjamini	FDR
GOTERM_MF_FAT	GO:0016209~antioxidant activity	9	1.91898	0.000115726	YALI0E12133G, YALI0E02266G, YALI0B08921G, YALI0E18029G, YALI0F08195G, YALI0B15125G, YALI0E34749G, YALI0A19426G, YALI0E34265G	243	19	2705	5.2729	0.0296423	0.00500253	0.151161
GOTERM_BP_FAT	GO:0006800~oxygen and reactive oxygen species metabolic process	4	0.852878	0.062864	YALI0E12133G, YALI0E02266G, YALI0B08921G, YALI0E34749G	224	10	2326	4.15357	1	0.671058	59.7145
GOTERM_MF_FAT	GO:0016721~oxidoreductase activity, acting on superoxide radicals as acceptor	3	0.639659	0.0939738	YALI0E12133G, YALI0E02266G, YALI0B08921G	243	6	2705	5.56584	1	0.798842	72.4715
GOTERM_MF_FAT	GO:0004784~superoxide dismutase activity	3	0.639659	0.0939738	YALI0E12133G, YALI0E02266G, YALI0B08921G	243	6	2705	5.56584	1	0.798842	72.4715
GOTERM_BP_FAT	GO:0006801~superoxide metabolic process	3	0.639659	0.174492	YALI0E12133G, YALI0E02266G, YALI0B08921G	224	8	2326	3.89397	1	0.84004	93.1791
Annotation Cluster 7	Enrichment Score: 1.4720352955372236
Category	Term	Count	%	PValue	Genes	List Total	Pop Hits	Pop Total	Fold Enrichment	Bonferroni	Benjamini	FDR
GOTERM_MF_FAT	GO:0015078~hydrogen ion transmembrane transporter activity	16	3.41151	3.66049e-06	YALI0F01771G, YALI0E34037G, YALI0B21527G, YALI0F04103G, YALI0F20306G, YALI0D12584G, YALI0E32164G, YALI0D17490G, YALI0D22022G, YALI0E10144G, YALI0D00583G, YALI0F24673G, YALI0F02893G, YALI0F03179G, YALI0F04114G, YALI0E16709G	243	45	2705	3.95793	0.000951277	0.000317193	0.00478456
GOTERM_MF_FAT	GO:0015077~monovalent inorganic cation transmembrane transporter activity	16	3.41151	9.06563e-06	YALI0F01771G, YALI0E34037G, YALI0B21527G, YALI0F04103G, YALI0F20306G, YALI0D12584G, YALI0E32164G, YALI0D17490G, YALI0D22022G, YALI0E10144G, YALI0D00583G, YALI0F24673G, YALI0F02893G, YALI0F03179G, YALI0F04114G, YALI0E16709G	243	48	2705	3.71056	0.0023543	0.000589095	0.0118491
GOTERM_BP_FAT	GO:0006091~generation of precursor metabolites and energy	23	4.90405	3.56011e-05	YALI0E34037G, YALI0B21527G, YALI0D09273G, YALI0D12584G, YALI0F20306G, YALI0D16753G, YALI0E32164G, YALI0D17490G, YALI0C06776G, YALI0C06369G, YALI0D12400G, YALI0D22022G, YALI0E15488G, YALI0E23089G, YALI0F24673G, YALI0D00583G, YALI0F02893G, YALI0F03179G, YALI0E05137G, YALI0D06303G, YALI0F05214G, YALI0F04114G, YALI0E00638G	224	93	2326	2.56807	0.0145258	0.00486556	0.0498411
GOTERM_MF_FAT	GO:0022890~inorganic cation transmembrane transporter activity	17	3.62473	8.08046e-05	YALI0F01771G, YALI0E34037G, YALI0B21527G, YALI0F04103G, YALI0F21659G, YALI0F20306G, YALI0D12584G, YALI0E32164G, YALI0D17490G, YALI0D22022G, YALI0E10144G, YALI0F24673G, YALI0D00583G, YALI0F02893G, YALI0F03179G, YALI0F04114G, YALI0E16709G	243	63	2705	3.00379	0.0207909	0.00419319	0.105569
GOTERM_CC_FAT	GO:0045259~proton-transporting ATP synthase complex	8	1.70576	0.000623594	YALI0B21527G, YALI0F20306G, YALI0D12584G, YALI0F03179G, YALI0F02893G, YALI0E32164G, YALI0D17490G, YALI0D22022G	136	14	1090	4.57983	0.0492716	0.0100545	0.662587
GOTERM_BP_FAT	GO:0006818~hydrogen transport	9	1.91898	0.00213692	YALI0B21527G, YALI0D00583G, YALI0F20306G, YALI0D12584G, YALI0F03179G, YALI0F02893G, YALI0E32164G, YALI0D17490G, YALI0D22022G	224	26	2326	3.59444	0.584891	0.16125	2.95114
GOTERM_BP_FAT	GO:0015985~energy coupled proton transport, down electrochemical gradient	9	1.91898	0.00213692	YALI0B21527G, YALI0D00583G, YALI0F20306G, YALI0D12584G, YALI0F03179G, YALI0F02893G, YALI0E32164G, YALI0D17490G, YALI0D22022G	224	26	2326	3.59444	0.584891	0.16125	2.95114
GOTERM_BP_FAT	GO:0015992~proton transport	9	1.91898	0.00213692	YALI0B21527G, YALI0D00583G, YALI0F20306G, YALI0D12584G, YALI0F03179G, YALI0F02893G, YALI0E32164G, YALI0D17490G, YALI0D22022G	224	26	2326	3.59444	0.584891	0.16125	2.95114
GOTERM_BP_FAT	GO:0015986~ATP synthesis coupled proton transport	9	1.91898	0.00213692	YALI0B21527G, YALI0D00583G, YALI0F20306G, YALI0D12584G, YALI0F03179G, YALI0F02893G, YALI0E32164G, YALI0D17490G, YALI0D22022G	224	26	2326	3.59444	0.584891	0.16125	2.95114
GOTERM_BP_FAT	GO:0034220~ion transmembrane transport	9	1.91898	0.00213692	YALI0B21527G, YALI0D00583G, YALI0F20306G, YALI0D12584G, YALI0F03179G, YALI0F02893G, YALI0E32164G, YALI0D17490G, YALI0D22022G	224	26	2326	3.59444	0.584891	0.16125	2.95114
GOTERM_BP_FAT	GO:0006119~oxidative phosphorylation	11	2.34542	0.00227215	YALI0E34037G, YALI0B21527G, YALI0D00583G, YALI0F24673G, YALI0F20306G, YALI0D12584G, YALI0F03179G, YALI0F02893G, YALI0E32164G, YALI0D17490G, YALI0D22022G	224	38	2326	3.00587	0.607382	0.144287	3.13515
KEGG_PATHWAY	yli00190:Oxidative phosphorylation	20	4.26439	0.00674528	YALI0F01771G, YALI0D11814G, YALI0E34037G, YALI0F04103G, YALI0F13541G, YALI0F20306G, YALI0D12584G, YALI0F24651G, YALI0C03201G, YALI0D22022G, YALI0E10144G, YALI0A20680G, YALI0E23089G, YALI0D00583G, YALI0F24673G, YALI0F04774G, YALI0E05599G, YALI0F02893G, YALI0F03179G, YALI0E16709G	160	79	1167	1.84652	0.324669	0.122651	6.51213
GOTERM_CC_FAT	GO:0016469~proton-transporting two-sector ATPase complex	9	1.91898	0.0100326	YALI0B21527G, YALI0D00583G, YALI0F20306G, YALI0D12584G, YALI0F03179G, YALI0F02893G, YALI0E32164G, YALI0D17490G, YALI0D22022G	136	26	1090	2.77432	0.558132	0.110128	10.1888
GOTERM_MF_FAT	GO:0046961~proton-transporting ATPase activity, rotational mechanism	5	1.0661	0.0124469	YALI0D00583G, YALI0D12584G, YALI0F03179G, YALI0F02893G, YALI0D22022G	243	11	2705	5.05986	0.961477	0.277942	15.1016
GOTERM_CC_FAT	GO:0045261~proton-transporting ATP synthase complex, catalytic core F(1)	4	0.852878	0.0154	YALI0D12584G, YALI0F03179G, YALI0F02893G, YALI0D22022G	136	5	1090	6.41176	0.715524	0.145414	15.2445
GOTERM_BP_FAT	GO:0009141~nucleoside triphosphate metabolic process	10	2.1322	0.0155166	YALI0B21527G, YALI0D00583G, YALI0F20306G, YALI0D12584G, YALI0F19448G, YALI0F03179G, YALI0F02893G, YALI0E32164G, YALI0D17490G, YALI0D22022G	224	42	2326	2.47236	0.998383	0.51039	19.6666
GOTERM_BP_FAT	GO:0015672~monovalent inorganic cation transport	10	2.1322	0.0155166	YALI0D19866G, YALI0B21527G, YALI0D00583G, YALI0F20306G, YALI0D12584G, YALI0F03179G, YALI0F02893G, YALI0E32164G, YALI0D17490G, YALI0D22022G	224	42	2326	2.47236	0.998383	0.51039	19.6666
GOTERM_MF_FAT	GO:0019829~cation-transporting ATPase activity	5	1.0661	0.0233807	YALI0D00583G, YALI0D12584G, YALI0F03179G, YALI0F02893G, YALI0D22022G	243	13	2705	4.28142	0.997869	0.401063	26.5996
GOTERM_MF_FAT	GO:0046933~hydrogen ion transporting ATP synthase activity, rotational mechanism	4	0.852878	0.0282197	YALI0D12584G, YALI0F03179G, YALI0F02893G, YALI0D22022G	243	8	2705	5.56584	0.999414	0.435892	31.2138
GOTERM_BP_FAT	GO:0046034~ATP metabolic process	9	1.91898	0.0325125	YALI0B21527G, YALI0D00583G, YALI0F20306G, YALI0D12584G, YALI0F03179G, YALI0F02893G, YALI0E32164G, YALI0D17490G, YALI0D22022G	224	40	2326	2.33638	0.999999	0.621044	37.0507
GOTERM_BP_FAT	GO:0006754~ATP biosynthetic process	9	1.91898	0.0325125	YALI0B21527G, YALI0D00583G, YALI0F20306G, YALI0D12584G, YALI0F03179G, YALI0F02893G, YALI0E32164G, YALI0D17490G, YALI0D22022G	224	40	2326	2.33638	0.999999	0.621044	37.0507
GOTERM_BP_FAT	GO:0055085~transmembrane transport	13	2.77186	0.0345184	YALI0D11572G, YALI0B21527G, YALI0F20306G, YALI0D12584G, YALI0E32164G, YALI0D17490G, YALI0E06237G, YALI0D22022G, YALI0F29931G, YALI0D06908G, YALI0D00583G, YALI0F02893G, YALI0F03179G	224	71	2326	1.90128	0.999999	0.594388	38.854
GOTERM_BP_FAT	GO:0009142~nucleoside triphosphate biosynthetic process	9	1.91898	0.0371781	YALI0B21527G, YALI0D00583G, YALI0F20306G, YALI0D12584G, YALI0F03179G, YALI0F02893G, YALI0E32164G, YALI0D17490G, YALI0D22022G	224	41	2326	2.2794	1	0.599872	41.1709
GOTERM_BP_FAT	GO:0009144~purine nucleoside triphosphate metabolic process	9	1.91898	0.0371781	YALI0B21527G, YALI0D00583G, YALI0F20306G, YALI0D12584G, YALI0F03179G, YALI0F02893G, YALI0E32164G, YALI0D17490G, YALI0D22022G	224	41	2326	2.2794	1	0.599872	41.1709
GOTERM_BP_FAT	GO:0009145~purine nucleoside triphosphate biosynthetic process	9	1.91898	0.0371781	YALI0B21527G, YALI0D00583G, YALI0F20306G, YALI0D12584G, YALI0F03179G, YALI0F02893G, YALI0E32164G, YALI0D17490G, YALI0D22022G	224	41	2326	2.2794	1	0.599872	41.1709
GOTERM_BP_FAT	GO:0009201~ribonucleoside triphosphate biosynthetic process	9	1.91898	0.0371781	YALI0B21527G, YALI0D00583G, YALI0F20306G, YALI0D12584G, YALI0F03179G, YALI0F02893G, YALI0E32164G, YALI0D17490G, YALI0D22022G	224	41	2326	2.2794	1	0.599872	41.1709
GOTERM_BP_FAT	GO:0009205~purine ribonucleoside triphosphate metabolic process	9	1.91898	0.0371781	YALI0B21527G, YALI0D00583G, YALI0F20306G, YALI0D12584G, YALI0F03179G, YALI0F02893G, YALI0E32164G, YALI0D17490G, YALI0D22022G	224	41	2326	2.2794	1	0.599872	41.1709
GOTERM_BP_FAT	GO:0009206~purine ribonucleoside triphosphate biosynthetic process	9	1.91898	0.0371781	YALI0B21527G, YALI0D00583G, YALI0F20306G, YALI0D12584G, YALI0F03179G, YALI0F02893G, YALI0E32164G, YALI0D17490G, YALI0D22022G	224	41	2326	2.2794	1	0.599872	41.1709
GOTERM_BP_FAT	GO:0009199~ribonucleoside triphosphate metabolic process	9	1.91898	0.0371781	YALI0B21527G, YALI0D00583G, YALI0F20306G, YALI0D12584G, YALI0F03179G, YALI0F02893G, YALI0E32164G, YALI0D17490G, YALI0D22022G	224	41	2326	2.2794	1	0.599872	41.1709
GOTERM_CC_FAT	GO:0033178~proton-transporting two-sector ATPase complex, catalytic domain	5	1.0661	0.0503137	YALI0D00583G, YALI0D12584G, YALI0F03179G, YALI0F02893G, YALI0D22022G	136	12	1090	3.33946	0.984725	0.275051	42.3148
SP_PIR_KEYWORDS	atp synthesis	3	0.639659	0.0646004	YALI0D12584G, YALI0F03179G, YALI0F02893G	467	6	6434	6.88865	0.99987	0.525611	54.2463
GOTERM_CC_FAT	GO:0045263~proton-transporting ATP synthase complex, coupling factor F(o)	4	0.852878	0.0890605	YALI0B21527G, YALI0F20306G, YALI0E32164G, YALI0D17490G	136	9	1090	3.56209	0.999477	0.358821	62.9944
GOTERM_BP_FAT	GO:0009150~purine ribonucleotide metabolic process	9	1.91898	0.0996307	YALI0B21527G, YALI0D00583G, YALI0F20306G, YALI0D12584G, YALI0F03179G, YALI0F02893G, YALI0E32164G, YALI0D17490G, YALI0D22022G	224	50	2326	1.86911	1	0.77404	76.999
GOTERM_BP_FAT	GO:0009152~purine ribonucleotide biosynthetic process	9	1.91898	0.0996307	YALI0B21527G, YALI0D00583G, YALI0F20306G, YALI0D12584G, YALI0F03179G, YALI0F02893G, YALI0E32164G, YALI0D17490G, YALI0D22022G	224	50	2326	1.86911	1	0.77404	76.999
GOTERM_CC_FAT	GO:0044455~mitochondrial membrane part	4	0.852878	0.116085	YALI0B21527G, YALI0F20306G, YALI0E32164G, YALI0F04114G	136	10	1090	3.20588	0.999954	0.426086	73.1541
GOTERM_CC_FAT	GO:0000276~mitochondrial proton-transporting ATP synthase complex, coupling factor F(o)	3	0.639659	0.118425	YALI0B21527G, YALI0F20306G, YALI0E32164G	136	5	1090	4.80882	0.999963	0.415704	73.9017
GOTERM_CC_FAT	GO:0005753~mitochondrial proton-transporting ATP synthase complex	3	0.639659	0.118425	YALI0B21527G, YALI0F20306G, YALI0E32164G	136	5	1090	4.80882	0.999963	0.415704	73.9017
GOTERM_BP_FAT	GO:0006164~purine nucleotide biosynthetic process	9	1.91898	0.118663	YALI0B21527G, YALI0D00583G, YALI0F20306G, YALI0D12584G, YALI0F03179G, YALI0F02893G, YALI0E32164G, YALI0D17490G, YALI0D22022G	224	52	2326	1.79722	1	0.802568	82.9463
GOTERM_BP_FAT	GO:0006163~purine nucleotide metabolic process	9	1.91898	0.139498	YALI0B21527G, YALI0D00583G, YALI0F20306G, YALI0D12584G, YALI0F03179G, YALI0F02893G, YALI0E32164G, YALI0D17490G, YALI0D22022G	224	54	2326	1.73065	1	0.80308	87.8011
GOTERM_BP_FAT	GO:0009259~ribonucleotide metabolic process	9	1.91898	0.150564	YALI0B21527G, YALI0D00583G, YALI0F20306G, YALI0D12584G, YALI0F03179G, YALI0F02893G, YALI0E32164G, YALI0D17490G, YALI0D22022G	224	55	2326	1.69919	1	0.81301	89.8232
GOTERM_BP_FAT	GO:0009260~ribonucleotide biosynthetic process	9	1.91898	0.150564	YALI0B21527G, YALI0D00583G, YALI0F20306G, YALI0D12584G, YALI0F03179G, YALI0F02893G, YALI0E32164G, YALI0D17490G, YALI0D22022G	224	55	2326	1.69919	1	0.81301	89.8232
GOTERM_MF_FAT	GO:0042625~ATPase activity, coupled to transmembrane movement of ions	5	1.0661	0.17962	YALI0D00583G, YALI0D12584G, YALI0F03179G, YALI0F02893G, YALI0D22022G	243	25	2705	2.22634	1	0.933417	92.4824
GOTERM_MF_FAT	GO:0015399~primary active transmembrane transporter activity	8	1.70576	0.19082	YALI0D22594G, YALI0C11011G, YALI0D00583G, YALI0D12584G, YALI0F03179G, YALI0F02893G, YALI0A19580G, YALI0D22022G	243	53	2705	1.68025	1	0.927304	93.7187
GOTERM_MF_FAT	GO:0015405~P-P-bond-hydrolysis-driven transmembrane transporter activity	8	1.70576	0.19082	YALI0D22594G, YALI0C11011G, YALI0D00583G, YALI0D12584G, YALI0F03179G, YALI0F02893G, YALI0A19580G, YALI0D22022G	243	53	2705	1.68025	1	0.927304	93.7187
GOTERM_BP_FAT	GO:0006812~cation transport	11	2.34542	0.208823	YALI0D19866G, YALI0B21527G, YALI0D00583G, YALI0F21659G, YALI0F20306G, YALI0D12584G, YALI0F03179G, YALI0F02893G, YALI0E32164G, YALI0D17490G, YALI0D22022G	224	78	2326	1.4644	1	0.887854	96.2371
SP_PIR_KEYWORDS	ion transport	4	0.852878	0.210552	YALI0D19866G, YALI0D12584G, YALI0F03179G, YALI0F02893G	467	22	6434	2.50496	1	0.82796	93.7219
GOTERM_BP_FAT	GO:0009165~nucleotide biosynthetic process	10	2.1322	0.223007	YALI0B21527G, YALI0D00583G, YALI0F20306G, YALI0D12584G, YALI0F03179G, YALI0F02893G, YALI0E32164G, YALI0F21527G, YALI0D17490G, YALI0D22022G	224	70	2326	1.48342	1	0.884736	97.0792
GOTERM_CC_FAT	GO:0033177~proton-transporting two-sector ATPase complex, proton-transporting domain	4	0.852878	0.245775	YALI0B21527G, YALI0F20306G, YALI0E32164G, YALI0D17490G	136	14	1090	2.28992	1	0.663098	95.0513
GOTERM_BP_FAT	GO:0034654~nucleobase, nucleoside, nucleotide and nucleic acid biosynthetic process	10	2.1322	0.315723	YALI0B21527G, YALI0D00583G, YALI0F20306G, YALI0D12584G, YALI0F03179G, YALI0F02893G, YALI0E32164G, YALI0F21527G, YALI0D17490G, YALI0D22022G	224	77	2326	1.34856	1	0.94429	99.5071
GOTERM_BP_FAT	GO:0034404~nucleobase, nucleoside and nucleotide biosynthetic process	10	2.1322	0.315723	YALI0B21527G, YALI0D00583G, YALI0F20306G, YALI0D12584G, YALI0F03179G, YALI0F02893G, YALI0E32164G, YALI0F21527G, YALI0D17490G, YALI0D22022G	224	77	2326	1.34856	1	0.94429	99.5071
GOTERM_BP_FAT	GO:0006811~ion transport	11	2.34542	0.359862	YALI0D19866G, YALI0B21527G, YALI0D00583G, YALI0F21659G, YALI0F20306G, YALI0D12584G, YALI0F03179G, YALI0F02893G, YALI0E32164G, YALI0D17490G, YALI0D22022G	224	90	2326	1.26915	1	0.96214	99.8063
GOTERM_MF_FAT	GO:0043492~ATPase activity, coupled to movement of substances	6	1.27932	0.413084	YALI0D00583G, YALI0D12584G, YALI0F03179G, YALI0F02893G, YALI0A19580G, YALI0D22022G	243	47	2705	1.42107	1	0.988544	99.9056
GOTERM_MF_FAT	GO:0042626~ATPase activity, coupled to transmembrane movement of substances	6	1.27932	0.413084	YALI0D00583G, YALI0D12584G, YALI0F03179G, YALI0F02893G, YALI0A19580G, YALI0D22022G	243	47	2705	1.42107	1	0.988544	99.9056
GOTERM_MF_FAT	GO:0016820~hydrolase activity, acting on acid anhydrides, catalyzing transmembrane movement of substances	6	1.27932	0.43142	YALI0D00583G, YALI0D12584G, YALI0F03179G, YALI0F02893G, YALI0A19580G, YALI0D22022G	243	48	2705	1.39146	1	0.989821	99.9376
GOTERM_MF_FAT	GO:0016887~ATPase activity	10	2.1322	0.752931	YALI0E27715G, YALI0D20856G, YALI0E10747G, YALI0D00583G, YALI0D12584G, YALI0F03179G, YALI0F02893G, YALI0A19580G, YALI0E33671G, YALI0D22022G	243	119	2705	0.935436	1	0.999859	100
GOTERM_BP_FAT	GO:0016310~phosphorylation	11	2.34542	0.83122	YALI0E34037G, YALI0B21527G, YALI0D00583G, YALI0F24673G, YALI0F20306G, YALI0D12584G, YALI0F03179G, YALI0F02893G, YALI0E32164G, YALI0D17490G, YALI0D22022G	224	132	2326	0.865327	1	0.999987	100
GOTERM_MF_FAT	GO:0042623~ATPase activity, coupled	8	1.70576	0.858004	YALI0E27715G, YALI0E10747G, YALI0D00583G, YALI0D12584G, YALI0F03179G, YALI0F02893G, YALI0A19580G, YALI0D22022G	243	107	2705	0.832276	1	0.99999	100
GOTERM_BP_FAT	GO:0006793~phosphorus metabolic process	12	2.55864	0.899471	YALI0E34037G, YALI0B21527G, YALI0D00583G, YALI0F24673G, YALI0F13541G, YALI0F20306G, YALI0D12584G, YALI0F03179G, YALI0F02893G, YALI0E32164G, YALI0D17490G, YALI0D22022G	224	156	2326	0.798764	1	0.999998	100
GOTERM_BP_FAT	GO:0006796~phosphate metabolic process	12	2.55864	0.899471	YALI0E34037G, YALI0B21527G, YALI0D00583G, YALI0F24673G, YALI0F13541G, YALI0F20306G, YALI0D12584G, YALI0F03179G, YALI0F02893G, YALI0E32164G, YALI0D17490G, YALI0D22022G	224	156	2326	0.798764	1	0.999998	100
Annotation Cluster 8	Enrichment Score: 1.385005672536979
Category	Term	Count	%	PValue	Genes	List Total	Pop Hits	Pop Total	Fold Enrichment	Bonferroni	Benjamini	FDR
INTERPRO	IPR004046:Glutathione S-transferase, C-terminal	4	0.852878	0.0412092	YALI0C21021G, YALI0D16467G, YALI0B20416G, YALI0A06743G	401	10	4938	4.92569	1	0.935129	46.6519
INTERPRO	IPR017933:Glutathione S-transferase/chloride channel, C-terminal	4	0.852878	0.0412092	YALI0C21021G, YALI0D16467G, YALI0B20416G, YALI0A06743G	401	10	4938	4.92569	1	0.935129	46.6519
INTERPRO	IPR010987:Glutathione S-transferase, C-terminal-like	4	0.852878	0.0412092	YALI0C21021G, YALI0D16467G, YALI0B20416G, YALI0A06743G	401	10	4938	4.92569	1	0.935129	46.6519
Annotation Cluster 9	Enrichment Score: 1.3288222167987458
Category	Term	Count	%	PValue	Genes	List Total	Pop Hits	Pop Total	Fold Enrichment	Bonferroni	Benjamini	FDR
SP_PIR_KEYWORDS	lipid synthesis	5	1.0661	0.00594756	YALI0D24629G, YALI0F05214G, YALI0F08701G, YALI0C19624G, YALI0B17644G	467	11	6434	6.26241	0.55038	0.147746	6.74605
SP_PIR_KEYWORDS	Fatty acid biosynthesis	3	0.639659	0.0862006	YALI0D24629G, YALI0F05214G, YALI0C19624G	467	7	6434	5.90456	0.999994	0.605122	65.1959
GOTERM_BP_FAT	GO:0006633~fatty acid biosynthetic process	5	1.0661	0.0862091	YALI0D20878G, YALI0F11297G, YALI0D24629G, YALI0F05214G, YALI0C19624G	224	18	2326	2.88442	1	0.733751	71.7034
GOTERM_BP_FAT	GO:0006631~fatty acid metabolic process	6	1.27932	0.109474	YALI0D20878G, YALI0C08811G, YALI0F11297G, YALI0D24629G, YALI0F05214G, YALI0C19624G	224	27	2326	2.30754	1	0.785012	80.2804

## Sheet: sre1Δ Hypox-v-Wildtype Hypox
Gene enrichment in sre1 cells compared to wildtype cells growing in hypoxia
Upregulated genes
Annotation Cluster 1	Enrichment Score: 7.232417268073447
Category	Term	Count	%	PValue	Genes	List Total	Pop Hits	Pop Total	Fold Enrichment	Bonferroni	Benjamini	FDR
GOTERM_BP_FAT	GO:0030163~protein catabolic process	30	5.30035	1.22122e-12	YALI0B01386G, YALI0E32505G, YALI0D16401G, YALI0D11770G, YALI0E24453G, YALI0D02871G, YALI0D09119G, YALI0C17325G, YALI0F06314G, YALI0D18194G, YALI0D11418G, YALI0B17072G, YALI0B16698G, YALI0D17204G, YALI0B14267G, YALI0F02585G, YALI0D06523G, YALI0C06149G, YALI0E12081G, YALI0F05764G, YALI0E21868G, YALI0B15224G, YALI0A20372G, YALI0D14058G, YALI0F26697G, YALI0F15367G, YALI0E26235G, YALI0D12452G, YALI0F0…	206	77	2326	4.39919	4.1156e-10	4.1156e-10	1.66087e-09
GOTERM_BP_FAT	GO:0009057~macromolecule catabolic process	30	5.30035	7.85242e-12	YALI0B01386G, YALI0E32505G, YALI0D16401G, YALI0D11770G, YALI0E24453G, YALI0D02871G, YALI0D09119G, YALI0C17325G, YALI0F06314G, YALI0D18194G, YALI0D11418G, YALI0B17072G, YALI0B16698G, YALI0D17204G, YALI0B14267G, YALI0F02585G, YALI0D06523G, YALI0C06149G, YALI0E12081G, YALI0F05764G, YALI0E21868G, YALI0B15224G, YALI0A20372G, YALI0D14058G, YALI0F26697G, YALI0F15367G, YALI0E26235G, YALI0D12452G, YALI0F0…	206	82	2326	4.13095	2.64625e-09	1.32313e-09	1.06791e-08
GOTERM_BP_FAT	GO:0006508~proteolysis	47	8.30389	1.9537e-09	YALI0D02981G, YALI0B01386G, YALI0E32505G, YALI0B06754G, YALI0D16401G, YALI0F20988G, YALI0B16500G, YALI0B02794G, YALI0D02871G, YALI0E24453G, YALI0D08052G, YALI0C23661G, YALI0F04059G, YALI0C17325G, YALI0F06314G, YALI0D18194G, YALI0B09427G, YALI0C20691G, YALI0C00803G, YALI0F23595G, YALI0B16698G, YALI0B17072G, YALI0F07667G, YALI0B14267G, YALI0D06523G, YALI0F05940G, YALI0C06149G, YALI0A05533G, YALI0E1…	206	216	2326	2.4569	6.58397e-07	2.19466e-07	2.657e-06
GOTERM_BP_FAT	GO:0051603~proteolysis involved in cellular protein catabolic process	23	4.0636	2.21141e-08	YALI0B17072G, YALI0E32505G, YALI0B16698G, YALI0D16401G, YALI0B14267G, YALI0D06523G, YALI0C06149G, YALI0E12081G, YALI0E24453G, YALI0D02871G, YALI0F05764G, YALI0A20372G, YALI0B15224G, YALI0C17325G, YALI0D14058G, YALI0F06314G, YALI0D18194G, YALI0F26697G, YALI0F15367G, YALI0E26235G, YALI0D12452G, YALI0F07469G, YALI0E04983G	206	68	2326	3.8191	7.45241e-06	1.86311e-06	3.00747e-05
GOTERM_BP_FAT	GO:0044257~cellular protein catabolic process	23	4.0636	2.21141e-08	YALI0B17072G, YALI0E32505G, YALI0B16698G, YALI0D16401G, YALI0B14267G, YALI0D06523G, YALI0C06149G, YALI0E12081G, YALI0E24453G, YALI0D02871G, YALI0F05764G, YALI0A20372G, YALI0B15224G, YALI0C17325G, YALI0D14058G, YALI0F06314G, YALI0D18194G, YALI0F26697G, YALI0F15367G, YALI0E26235G, YALI0D12452G, YALI0F07469G, YALI0E04983G	206	68	2326	3.8191	7.45241e-06	1.86311e-06	3.00747e-05
GOTERM_BP_FAT	GO:0044265~cellular macromolecule catabolic process	23	4.0636	7.17598e-08	YALI0B17072G, YALI0E32505G, YALI0B16698G, YALI0D16401G, YALI0B14267G, YALI0D06523G, YALI0C06149G, YALI0E12081G, YALI0E24453G, YALI0D02871G, YALI0F05764G, YALI0A20372G, YALI0B15224G, YALI0C17325G, YALI0D14058G, YALI0F06314G, YALI0D18194G, YALI0F26697G, YALI0F15367G, YALI0E26235G, YALI0D12452G, YALI0F07469G, YALI0E04983G	206	72	2326	3.60693	2.41828e-05	4.8366e-06	9.75919e-05
GOTERM_BP_FAT	GO:0043632~modification-dependent macromolecule catabolic process	19	3.35689	2.13409e-06	YALI0B17072G, YALI0B16698G, YALI0D16401G, YALI0B14267G, YALI0C06149G, YALI0E12081G, YALI0D02871G, YALI0E24453G, YALI0F05764G, YALI0A20372G, YALI0C17325G, YALI0F06314G, YALI0D18194G, YALI0F26697G, YALI0F15367G, YALI0E26235G, YALI0D12452G, YALI0F07469G, YALI0E04983G	206	61	2326	3.51695	0.000718929	0.000102736	0.00290228
GOTERM_BP_FAT	GO:0019941~modification-dependent protein catabolic process	19	3.35689	2.13409e-06	YALI0B17072G, YALI0B16698G, YALI0D16401G, YALI0B14267G, YALI0C06149G, YALI0E12081G, YALI0D02871G, YALI0E24453G, YALI0F05764G, YALI0A20372G, YALI0C17325G, YALI0F06314G, YALI0D18194G, YALI0F26697G, YALI0F15367G, YALI0E26235G, YALI0D12452G, YALI0F07469G, YALI0E04983G	206	61	2326	3.51695	0.000718929	0.000102736	0.00290228
GOTERM_BP_FAT	GO:0006511~ubiquitin-dependent protein catabolic process	13	2.29682	1.53581e-05	YALI0B16698G, YALI0B17072G, YALI0D16401G, YALI0B14267G, YALI0D02871G, YALI0C17325G, YALI0F06314G, YALI0D18194G, YALI0E26235G, YALI0F15367G, YALI0D12452G, YALI0F07469G, YALI0E04983G	206	34	2326	4.31725	0.00516236	0.000646758	0.0208848
SP_PIR_KEYWORDS	ubl conjugation pathway	9	1.59011	0.0103084	YALI0F05764G, YALI0A20372G, YALI0B17072G, YALI0F26697G, YALI0C06149G, YALI0F15367G, YALI0E12081G, YALI0E24453G, YALI0D02871G	558	36	6434	2.88262	0.742673	0.237751	11.3819
Annotation Cluster 2	Enrichment Score: 5.010668051588851
Category	Term	Count	%	PValue	Genes	List Total	Pop Hits	Pop Total	Fold Enrichment	Bonferroni	Benjamini	FDR
GOTERM_BP_FAT	GO:0006508~proteolysis	47	8.30389	1.9537e-09	YALI0D02981G, YALI0B01386G, YALI0E32505G, YALI0B06754G, YALI0D16401G, YALI0F20988G, YALI0B16500G, YALI0B02794G, YALI0D02871G, YALI0E24453G, YALI0D08052G, YALI0C23661G, YALI0F04059G, YALI0C17325G, YALI0F06314G, YALI0D18194G, YALI0B09427G, YALI0C20691G, YALI0C00803G, YALI0F23595G, YALI0B16698G, YALI0B17072G, YALI0F07667G, YALI0B14267G, YALI0D06523G, YALI0F05940G, YALI0C06149G, YALI0A05533G, YALI0E1…	206	216	2326	2.4569	6.58397e-07	2.19466e-07	2.657e-06
GOTERM_MF_FAT	GO:0070011~peptidase activity, acting on L-amino acid peptides	35	6.18375	2.61322e-06	YALI0D02981G, YALI0B01386G, YALI0E32505G, YALI0B06754G, YALI0F20988G, YALI0B16500G, YALI0B02794G, YALI0D02871G, YALI0D08052G, YALI0C23661G, YALI0F04059G, YALI0C17325G, YALI0F06314G, YALI0B09427G, YALI0C20691G, YALI0C00803G, YALI0F23595G, YALI0B17072G, YALI0F07667G, YALI0A13277G, YALI0B14267G, YALI0D06523G, YALI0F05940G, YALI0C10494G, YALI0A05533G, YALI0E33363G, YALI0F26169G, YALI0B15224G, YALI0F2…	249	165	2705	2.30437	0.000807159	0.000807159	0.00350773
GOTERM_MF_FAT	GO:0008233~peptidase activity	35	6.18375	1.043e-05	YALI0D02981G, YALI0B01386G, YALI0E32505G, YALI0B06754G, YALI0F20988G, YALI0B16500G, YALI0B02794G, YALI0D02871G, YALI0D08052G, YALI0C23661G, YALI0F04059G, YALI0C17325G, YALI0F06314G, YALI0B09427G, YALI0C20691G, YALI0C00803G, YALI0F23595G, YALI0B17072G, YALI0F07667G, YALI0A13277G, YALI0B14267G, YALI0D06523G, YALI0F05940G, YALI0C10494G, YALI0A05533G, YALI0E33363G, YALI0F26169G, YALI0B15224G, YALI0F2…	249	175	2705	2.17269	0.0032177	0.00161015	0.0139996
SP_PIR_KEYWORDS	Protease	20	3.53357	2.9992e-05	YALI0F23595G, YALI0D02981G, YALI0B17072G, YALI0E32505G, YALI0F07667G, YALI0A13277G, YALI0D06523G, YALI0B16500G, YALI0F20988G, YALI0C10494G, YALI0D02871G, YALI0E33363G, YALI0F26169G, YALI0F04059G, YALI0B15224G, YALI0F20592G, YALI0D14058G, YALI0C08547G, YALI0C20691G, YALI0F15367G	558	79	6434	2.91911	0.00392131	0.00130881	0.0349693
GOTERM_MF_FAT	GO:0004175~endopeptidase activity	25	4.41696	5.23987e-05	YALI0D02981G, YALI0B01386G, YALI0E32505G, YALI0B06754G, YALI0B16500G, YALI0F20988G, YALI0B02794G, YALI0F04059G, YALI0C17325G, YALI0F06314G, YALI0C20691G, YALI0F23595G, YALI0F07667G, YALI0B14267G, YALI0D06523G, YALI0F05940G, YALI0A05533G, YALI0E33363G, YALI0F26169G, YALI0B15224G, YALI0D14058G, YALI0C08547G, YALI0F25091G, YALI0E28743G, YALI0F07469G	249	113	2705	2.40342	0.0160612	0.00538267	0.0703131
SP_PIR_KEYWORDS	hydrolase	33	5.83039	0.0103121	YALI0D02981G, YALI0E32505G, YALI0B08030G, YALI0E05995G, YALI0F20988G, YALI0B16500G, YALI0D08250G, YALI0D02871G, YALI0F04059G, YALI0B02684G, YALI0E14795G, YALI0C20691G, YALI0C23991G, YALI0F23595G, YALI0B17072G, YALI0F07667G, YALI0A13277G, YALI0D06523G, YALI0C19778G, YALI0C10494G, YALI0A05357G, YALI0E33363G, YALI0F26169G, YALI0F07491G, YALI0B15224G, YALI0F20592G, YALI0D14058G, YALI0C08547G, YALI0F0…	558	243	6434	1.56587	0.742799	0.202534	11.3858
Annotation Cluster 3	Enrichment Score: 3.9753488779931727
Category	Term	Count	%	PValue	Genes	List Total	Pop Hits	Pop Total	Fold Enrichment	Bonferroni	Benjamini	FDR
KEGG_PATHWAY	yli03050:Proteasome	22	3.88693	2.33162e-15	YALI0B22286G, YALI0D03762G, YALI0E32505G, YALI0F09834G, YALI0D17204G, YALI0B14267G, YALI0D11770G, YALI0D06523G, YALI0F02585G, YALI0D09977G, YALI0E13145G, YALI0E21868G, YALI0B15224G, YALI0D09119G, YALI0C17325G, YALI0D19910G, YALI0D14058G, YALI0F06314G, YALI0D11418G, YALI0A18612G, YALI0F28413G, YALI0F07469G	102	34	1167	7.40311	1.56208e-13	1.56208e-13	2.38698e-12
GOTERM_CC_FAT	GO:0000502~proteasome complex	11	1.94346	4.81738e-08	YALI0B15224G, YALI0C17325G, YALI0E32505G, YALI0D14058G, YALI0F06314G, YALI0F09834G, YALI0B14267G, YALI0D06523G, YALI0A18612G, YALI0F07469G, YALI0F28413G	78	18	1090	8.53989	3.95024e-06	3.95024e-06	5.14648e-05
GOTERM_CC_FAT	GO:0005839~proteasome core complex	8	1.41343	1.54368e-05	YALI0B15224G, YALI0C17325G, YALI0E32505G, YALI0D14058G, YALI0F06314G, YALI0B14267G, YALI0D06523G, YALI0F07469G	78	14	1090	7.98535	0.00126502	0.000632712	0.0164901
INTERPRO	IPR001353:Proteasome, subunit alpha/beta	8	1.41343	6.90934e-05	YALI0B15224G, YALI0C17325G, YALI0E32505G, YALI0D14058G, YALI0F06314G, YALI0B14267G, YALI0D06523G, YALI0F07469G	428	14	4938	6.59279	0.0435883	0.0147458	0.103006
GOTERM_MF_FAT	GO:0004298~threonine-type endopeptidase activity	8	1.41343	9.79983e-05	YALI0B15224G, YALI0C17325G, YALI0E32505G, YALI0D14058G, YALI0F06314G, YALI0B14267G, YALI0D06523G, YALI0F07469G	249	14	2705	6.20769	0.029829	0.00754216	0.131465
GOTERM_MF_FAT	GO:0070003~threonine-type peptidase activity	8	1.41343	9.79983e-05	YALI0B15224G, YALI0C17325G, YALI0E32505G, YALI0D14058G, YALI0F06314G, YALI0B14267G, YALI0D06523G, YALI0F07469G	249	14	2705	6.20769	0.029829	0.00754216	0.131465
INTERPRO	IPR001353:Proteasome, alpha and beta subunits	6	1.06007	0.000443976	YALI0B15224G, YALI0E32505G, YALI0D14058G, YALI0F06314G, YALI0B14267G, YALI0F07469G	428	9	4938	7.69159	0.249059	0.0556757	0.660165
PIR_SUPERFAMILY	PIRSF001212:multicatalytic endopeptidase complex chain C9	4	0.706714	0.00548141	YALI0B15224G, YALI0F06314G, YALI0B14267G, YALI0F07469G	109	5	1253	9.19633	0.485765	0.282898	6.12356
INTERPRO	IPR000426:Proteasome, alpha-subunit, conserved site	4	0.706714	0.0172584	YALI0C17325G, YALI0F06314G, YALI0B14267G, YALI0F07469G	428	7	4938	6.59279	0.999987	0.607703	22.8688
SP_PIR_KEYWORDS	proteasome	4	0.706714	0.0173316	YALI0B15224G, YALI0E32505G, YALI0D14058G, YALI0D06523G	558	7	6434	6.58884	0.898768	0.248957	18.4441
SP_PIR_KEYWORDS	threonine protease	4	0.706714	0.0173316	YALI0B15224G, YALI0E32505G, YALI0D14058G, YALI0D06523G	558	7	6434	6.58884	0.898768	0.248957	18.4441
INTERPRO	IPR016050:Proteasome, beta-type subunit, conserved site	3	0.530035	0.0885962	YALI0B15224G, YALI0E32505G, YALI0D06523G	428	6	4938	5.76869	1	0.934114	74.9348
GOTERM_CC_FAT	GO:0005829~cytosol	4	0.706714	0.162638	YALI0B15224G, YALI0E32505G, YALI0D14058G, YALI0D06523G	78	20	1090	2.79487	1	0.766713	84.9868
Annotation Cluster 4	Enrichment Score: 3.97514013454534
Category	Term	Count	%	PValue	Genes	List Total	Pop Hits	Pop Total	Fold Enrichment	Bonferroni	Benjamini	FDR
SP_PIR_KEYWORDS	autophagy	12	2.12014	2.93456e-07	YALI0E24519G, YALI0D25388G, YALI0E22737G, YALI0A13277G, YALI0D18403G, YALI0F03432G, YALI0D07678G, YALI0F06358G, YALI0F27907G, YALI0F08349G, YALI0B04598G, YALI0E24453G	558	21	6434	6.58884	3.8442e-05	3.8442e-05	0.000342209
GOTERM_BP_FAT	GO:0006914~autophagy	12	2.12014	5.693e-07	YALI0E24519G, YALI0D25388G, YALI0E22737G, YALI0A13277G, YALI0D18403G, YALI0F03432G, YALI0D07678G, YALI0F06358G, YALI0F27907G, YALI0F08349G, YALI0B04598G, YALI0E24453G	206	22	2326	6.15887	0.000191836	3.19752e-05	0.000774235
SP_PIR_KEYWORDS	protein transport	20	3.53357	5.68697e-06	YALI0E24519G, YALI0D25388G, YALI0E22737G, YALI0B06754G, YALI0A13277G, YALI0D18403G, YALI0D07678G, YALI0A03443G, YALI0E24453G, YALI0F06446G, YALI0E32703G, YALI0E13233G, YALI0F03432G, YALI0E18414G, YALI0E23067G, YALI0F05456G, YALI0F27907G, YALI0B04598G, YALI0F08349G, YALI0A04367G	558	71	6434	3.24802	0.000744717	0.000372428	0.00663159
GOTERM_BP_FAT	GO:0045184~establishment of protein localization	27	4.77032	0.000639557	YALI0E24519G, YALI0B04070G, YALI0C22275G, YALI0F27181G, YALI0B06754G, YALI0D18403G, YALI0D07678G, YALI0E24453G, YALI0E32703G, YALI0E13233G, YALI0D23353G, YALI0F03432G, YALI0F05456G, YALI0E23067G, YALI0F27907G, YALI0A20592G, YALI0F08349G, YALI0B04598G, YALI0A04367G, YALI0D25388G, YALI0A13277G, YALI0E22737G, YALI0A03443G, YALI0D07128G, YALI0F23529G, YALI0F06446G, YALI0E18414G	206	154	2326	1.97964	0.193942	0.0236709	0.86629
GOTERM_BP_FAT	GO:0015031~protein transport	27	4.77032	0.000639557	YALI0E24519G, YALI0B04070G, YALI0C22275G, YALI0F27181G, YALI0B06754G, YALI0D18403G, YALI0D07678G, YALI0E24453G, YALI0E32703G, YALI0E13233G, YALI0D23353G, YALI0F03432G, YALI0F05456G, YALI0E23067G, YALI0F27907G, YALI0A20592G, YALI0F08349G, YALI0B04598G, YALI0A04367G, YALI0D25388G, YALI0A13277G, YALI0E22737G, YALI0A03443G, YALI0D07128G, YALI0F23529G, YALI0F06446G, YALI0E18414G	206	154	2326	1.97964	0.193942	0.0236709	0.86629
GOTERM_BP_FAT	GO:0008104~protein localization	27	4.77032	0.00095894	YALI0E24519G, YALI0B04070G, YALI0C22275G, YALI0F27181G, YALI0B06754G, YALI0D18403G, YALI0D07678G, YALI0E24453G, YALI0E32703G, YALI0E13233G, YALI0D23353G, YALI0F03432G, YALI0F05456G, YALI0E23067G, YALI0F27907G, YALI0A20592G, YALI0F08349G, YALI0B04598G, YALI0A04367G, YALI0D25388G, YALI0A13277G, YALI0E22737G, YALI0A03443G, YALI0D07128G, YALI0F23529G, YALI0F06446G, YALI0E18414G	206	158	2326	1.92952	0.276256	0.0318147	1.29629
GOTERM_CC_FAT	GO:0019898~extrinsic to membrane	6	1.06007	0.00488087	YALI0E24519G, YALI0D18403G, YALI0F03432G, YALI0D07678G, YALI0F27907G, YALI0B04598G	78	17	1090	4.93213	0.330491	0.0954365	5.09281
SP_PIR_KEYWORDS	transport	29	5.12367	0.00869094	YALI0E24519G, YALI0E32571G, YALI0B06754G, YALI0D18403G, YALI0D07678G, YALI0E22957G, YALI0E24453G, YALI0E32703G, YALI0E13233G, YALI0F03432G, YALI0F05456G, YALI0E23067G, YALI0F27907G, YALI0F08349G, YALI0B04598G, YALI0A04367G, YALI0D19580G, YALI0D25388G, YALI0E03058G, YALI0E22737G, YALI0A13277G, YALI0A03443G, YALI0F06446G, YALI0C02431G, YALI0A04895G, YALI0E18414G, YALI0F15609G, YALI0E24123G, YALI0A2…	558	203	6434	1.64721	0.681295	0.248641	9.67819
Annotation Cluster 5	Enrichment Score: 1.9430710799785078
Category	Term	Count	%	PValue	Genes	List Total	Pop Hits	Pop Total	Fold Enrichment	Bonferroni	Benjamini	FDR
INTERPRO	IPR000449:Ubiquitin-associated/translation elongation factor EF1B, N-terminal	5	0.883392	0.00291172	YALI0E02134G, YALI0B17072G, YALI0B06754G, YALI0D16401G, YALI0D05313G	428	8	4938	7.21086	0.847531	0.269091	4.25605
INTERPRO	IPR015940:Ubiquitin-associated/translation elongation factor EF1B, N-terminal, eukaryote	5	0.883392	0.00488591	YALI0E02134G, YALI0B17072G, YALI0B06754G, YALI0D16401G, YALI0D05313G	428	9	4938	6.40966	0.957538	0.326247	7.04492
SMART	SM00165:UBA	5	0.883392	0.0124015	YALI0E02134G, YALI0B17072G, YALI0B06754G, YALI0D16401G, YALI0D05313G	173	9	1528	4.90687	0.709289	0.709289	12.9117
INTERPRO	IPR019955:Ubiquitin supergroup	4	0.706714	0.0957517	YALI0E02134G, YALI0B06754G, YALI0D16401G, YALI0D02871G	428	13	4938	3.54996	1	0.94055	77.7149
Annotation Cluster 6	Enrichment Score: 1.7663979416773117
Category	Term	Count	%	PValue	Genes	List Total	Pop Hits	Pop Total	Fold Enrichment	Bonferroni	Benjamini	FDR
GOTERM_MF_FAT	GO:0008236~serine-type peptidase activity	11	1.94346	0.0016373	YALI0F26169G, YALI0F23595G, YALI0D02981G, YALI0D08052G, YALI0C23661G, YALI0B16500G, YALI0E28743G, YALI0C20691G, YALI0A05533G, YALI0B02794G, YALI0C00803G	249	38	2705	3.14468	0.397303	0.0963093	2.17558
GOTERM_MF_FAT	GO:0017171~serine hydrolase activity	11	1.94346	0.0016373	YALI0F26169G, YALI0F23595G, YALI0D02981G, YALI0D08052G, YALI0C23661G, YALI0B16500G, YALI0E28743G, YALI0C20691G, YALI0A05533G, YALI0B02794G, YALI0C00803G	249	38	2705	3.14468	0.397303	0.0963093	2.17558
GOTERM_MF_FAT	GO:0004252~serine-type endopeptidase activity	8	1.41343	0.00442889	YALI0F26169G, YALI0F23595G, YALI0D02981G, YALI0B16500G, YALI0E28743G, YALI0C20691G, YALI0A05533G, YALI0B02794G	249	24	2705	3.62115	0.746291	0.157554	5.78418
SP_PIR_KEYWORDS	Serine protease	5	0.883392	0.0640794	YALI0F26169G, YALI0F23595G, YALI0D02981G, YALI0B16500G, YALI0C20691G	558	18	6434	3.20291	0.999829	0.46188	53.8037
INTERPRO	IPR015500:Peptidase S8, subtilisin-related	4	0.706714	0.134254	YALI0D02981G, YALI0B16500G, YALI0C20691G, YALI0B02794G	428	15	4938	3.07664	1	0.968061	88.3547
INTERPRO	IPR000209:Peptidase S8 and S53, subtilisin, kexin, sedolisin	4	0.706714	0.246838	YALI0D02981G, YALI0B16500G, YALI0C20691G, YALI0B02794G	428	20	4938	2.30748	1	0.996076	98.5421
Annotation Cluster 7	Enrichment Score: 1.7387647148329977
Category	Term	Count	%	PValue	Genes	List Total	Pop Hits	Pop Total	Fold Enrichment	Bonferroni	Benjamini	FDR
GOTERM_CC_FAT	GO:0009898~internal side of plasma membrane	6	1.06007	0.00638905	YALI0B04070G, YALI0F06446G, YALI0E13233G, YALI0F05456G, YALI0E23067G, YALI0A04367G	78	18	1090	4.65812	0.408789	0.0997805	6.61825
GOTERM_CC_FAT	GO:0044459~plasma membrane part	6	1.06007	0.0226632	YALI0B04070G, YALI0F06446G, YALI0E13233G, YALI0F05456G, YALI0E23067G, YALI0A04367G	78	24	1090	3.49359	0.847375	0.268966	21.7218
GOTERM_CC_FAT	GO:0005886~plasma membrane	6	1.06007	0.0419708	YALI0B04070G, YALI0F06446G, YALI0E13233G, YALI0F05456G, YALI0E23067G, YALI0A04367G	78	28	1090	2.99451	0.970279	0.394847	36.7492
Annotation Cluster 8	Enrichment Score: 1.6398261760500217
Category	Term	Count	%	PValue	Genes	List Total	Pop Hits	Pop Total	Fold Enrichment	Bonferroni	Benjamini	FDR
GOTERM_MF_FAT	GO:0016881~acid-amino acid ligase activity	10	1.76678	0.00407436	YALI0F05764G, YALI0A20372G, YALI0E33033G, YALI0B03718G, YALI0F26697G, YALI0C06149G, YALI0E12081G, YALI0D12452G, YALI0E04620G, YALI0F04147G	249	36	2705	3.01763	0.716785	0.189625	5.33282
GOTERM_MF_FAT	GO:0016879~ligase activity, forming carbon-nitrogen bonds	14	2.4735	0.00436259	YALI0E07271G, YALI0E33033G, YALI0E01056G, YALI0C06149G, YALI0D13024G, YALI0E12081G, YALI0E10571G, YALI0E04620G, YALI0F04147G, YALI0F05764G, YALI0A20372G, YALI0B03718G, YALI0F26697G, YALI0D12452G	249	64	2705	2.37638	0.741016	0.175517	5.69993
GOTERM_MF_FAT	GO:0004842~ubiquitin-protein ligase activity	5	0.883392	0.00599845	YALI0F05764G, YALI0B03718G, YALI0F26697G, YALI0E12081G, YALI0D12452G	249	9	2705	6.03525	0.844188	0.186628	7.7586
SP_PIR_KEYWORDS	ubl conjugation pathway	9	1.59011	0.0103084	YALI0F05764G, YALI0A20372G, YALI0B17072G, YALI0F26697G, YALI0C06149G, YALI0F15367G, YALI0E12081G, YALI0E24453G, YALI0D02871G	558	36	6434	2.88262	0.742673	0.237751	11.3819
GOTERM_MF_FAT	GO:0019787~small conjugating protein ligase activity	7	1.23675	0.0118454	YALI0F05764G, YALI0B03718G, YALI0F26697G, YALI0C06149G, YALI0E12081G, YALI0D12452G, YALI0E04620G	249	22	2705	3.45655	0.974829	0.308026	14.7816
KEGG_PATHWAY	yli04120:Ubiquitin mediated proteolysis	10	1.76678	0.0120234	YALI0F05764G, YALI0C14740G, YALI0A20372G, YALI0D06259G, YALI0F26697G, YALI0C06149G, YALI0E12081G, YALI0D12452G, YALI0E04983G, YALI0F04147G	102	45	1167	2.54248	0.555343	0.333174	11.6676
GOTERM_BP_FAT	GO:0070647~protein modification by small protein conjugation or removal	4	0.706714	0.0180849	YALI0F05764G, YALI0E12081G, YALI0D12452G, YALI0F04147G	206	7	2326	6.45215	0.997867	0.401023	21.9798
GOTERM_BP_FAT	GO:0032446~protein modification by small protein conjugation	4	0.706714	0.0180849	YALI0F05764G, YALI0E12081G, YALI0D12452G, YALI0F04147G	206	7	2326	6.45215	0.997867	0.401023	21.9798
INTERPRO	IPR000608:Ubiquitin-conjugating enzyme, E2	5	0.883392	0.0434691	YALI0F05764G, YALI0F26697G, YALI0C06149G, YALI0E12081G, YALI0E04620G	428	16	4938	3.60543	1	0.814776	48.4631
INTERPRO	IPR016135:Ubiquitin-conjugating enzyme/RWD-like	5	0.883392	0.0882136	YALI0F05764G, YALI0F26697G, YALI0C06149G, YALI0E12081G, YALI0E04620G	428	20	4938	2.88435	1	0.941367	74.7774
GOTERM_BP_FAT	GO:0016567~protein ubiquitination	3	0.530035	0.0915001	YALI0F05764G, YALI0E12081G, YALI0D12452G	206	6	2326	5.64563	1	0.867499	72.884
SMART	SM00212:UBCc	5	0.883392	0.0958406	YALI0F05764G, YALI0F26697G, YALI0C06149G, YALI0E12081G, YALI0E04620G	173	16	1528	2.76012	0.999953	0.863965	67.2458
SP_PIR_KEYWORDS	ligase	6	1.06007	0.279467	YALI0F05764G, YALI0F02299G, YALI0E33033G, YALI0F26697G, YALI0C06149G, YALI0E12081G	558	41	6434	1.68739	1	0.808224	97.812
Annotation Cluster 9	Enrichment Score: 1.5584460857759508
Category	Term	Count	%	PValue	Genes	List Total	Pop Hits	Pop Total	Fold Enrichment	Bonferroni	Benjamini	FDR
INTERPRO	IPR005937:26S proteasome subunit P45	6	1.06007	2.63687e-05	YALI0E21868G, YALI0D09119G, YALI0D17204G, YALI0F02585G, YALI0D11418G, YALI0D11770G	428	6	4938	11.5374	0.0168642	0.0168642	0.0393227
INTERPRO	IPR003959:ATPase, AAA-type, core	12	2.12014	5.95609e-05	YALI0F26169G, YALI0F23595G, YALI0E21868G, YALI0F12155G, YALI0B01386G, YALI0D09119G, YALI0C05038G, YALI0D17204G, YALI0C23749G, YALI0F02585G, YALI0D11418G, YALI0D11770G	428	33	4938	4.19541	0.0376893	0.0190256	0.0888005
INTERPRO	IPR003960:ATPase, AAA-type, conserved site	9	1.59011	0.000145145	YALI0E21868G, YALI0F12155G, YALI0B01386G, YALI0D09119G, YALI0D17204G, YALI0C23749G, YALI0F02585G, YALI0D11418G, YALI0D11770G	428	20	4938	5.19182	0.0893761	0.0231345	0.216271
PIR_SUPERFAMILY	PIRSF001171:ATP-dependent 26S proteinase	4	0.706714	0.00233938	YALI0D17204G, YALI0F02585G, YALI0D11418G, YALI0D11770G	109	4	1253	11.4954	0.246779	0.246779	2.6567
INTERPRO	IPR003593:ATPase, AAA+ type, core	17	3.00353	0.0039547	YALI0F23595G, YALI0B01386G, YALI0C05038G, YALI0F15477G, YALI0D17204G, YALI0C23749G, YALI0F02585G, YALI0D25828G, YALI0D11770G, YALI0E25201G, YALI0F26169G, YALI0F12155G, YALI0E21868G, YALI0D09119G, YALI0D11418G, YALI0F31845G, YALI0D02607G	428	90	4938	2.17928	0.922373	0.305886	5.73901
SMART	SM00382:AAA	17	3.00353	0.0381855	YALI0F23595G, YALI0B01386G, YALI0C05038G, YALI0F15477G, YALI0D17204G, YALI0C23749G, YALI0F02585G, YALI0D25828G, YALI0D11770G, YALI0E25201G, YALI0F26169G, YALI0F12155G, YALI0E21868G, YALI0D09119G, YALI0D11418G, YALI0F31845G, YALI0D02607G	173	90	1528	1.66834	0.978814	0.723298	35.035
SP_PIR_KEYWORDS	nucleotide-binding	42	7.42049	0.062828	YALI0E25135G, YALI0B01386G, YALI0E19074G, YALI0E23001G, YALI0F27181G, YALI0C23749G, YALI0F15477G, YALI0D11770G, YALI0D25828G, YALI0E25201G, YALI0D01045G, YALI0F12155G, YALI0D09119G, YALI0B02684G, YALI0D11418G, YALI0B08558G, YALI0D24079G, YALI0E23067G, YALI0D19470G, YALI0B17556G, YALI0D02607G, YALI0F31845G, YALI0A04367G, YALI0F23595G, YALI0E10879G, YALI0D25388G, YALI0F30217G, YALI0C05038G, YALI0E0…	558	373	6434	1.29834	0.999797	0.507552	53.0782
GOTERM_MF_FAT	GO:0032555~purine ribonucleotide binding	57	10.0707	0.114528	YALI0E19074G, YALI0F27181G, YALI0C23749G, YALI0D11770G, YALI0D25828G, YALI0E25201G, YALI0F09009G, YALI0D11418G, YALI0B08558G, YALI0D24079G, YALI0D19470G, YALI0D02607G, YALI0F23595G, YALI0E10879G, YALI0D25388G, YALI0F30217G, YALI0E06501G, YALI0C05038G, YALI0E33377G, YALI0F02299G, YALI0E33033G, YALI0D07128G, YALI0B08778G, YALI0F04147G, YALI0F05764G, YALI0E19679G, YALI0E25135G, YALI0D21010G, YALI0B0…	249	527	2705	1.17498	1	0.847296	80.4604
GOTERM_MF_FAT	GO:0032553~ribonucleotide binding	57	10.0707	0.114528	YALI0E19074G, YALI0F27181G, YALI0C23749G, YALI0D11770G, YALI0D25828G, YALI0E25201G, YALI0F09009G, YALI0D11418G, YALI0B08558G, YALI0D24079G, YALI0D19470G, YALI0D02607G, YALI0F23595G, YALI0E10879G, YALI0D25388G, YALI0F30217G, YALI0E06501G, YALI0C05038G, YALI0E33377G, YALI0F02299G, YALI0E33033G, YALI0D07128G, YALI0B08778G, YALI0F04147G, YALI0F05764G, YALI0E19679G, YALI0E25135G, YALI0D21010G, YALI0B0…	249	527	2705	1.17498	1	0.847296	80.4604
GOTERM_MF_FAT	GO:0017076~purine nucleotide binding	60	10.6007	0.176655	YALI0E19074G, YALI0F27181G, YALI0C23749G, YALI0D11770G, YALI0D25828G, YALI0E25201G, YALI0F09009G, YALI0D11418G, YALI0B08558G, YALI0D24079G, YALI0D19470G, YALI0D02607G, YALI0F23595G, YALI0E10879G, YALI0D25388G, YALI0F30217G, YALI0C05038G, YALI0B19998G, YALI0E06501G, YALI0E33377G, YALI0F02299G, YALI0E33033G, YALI0D09603G, YALI0D07128G, YALI0B08778G, YALI0F04147G, YALI0F05764G, YALI0E19679G, YALI0E2…	249	576	2705	1.13161	1	0.87396	92.6408
SP_PIR_KEYWORDS	atp-binding	32	5.65371	0.18374	YALI0E25135G, YALI0B01386G, YALI0E19074G, YALI0C23749G, YALI0F15477G, YALI0D25828G, YALI0D11770G, YALI0E25201G, YALI0F12155G, YALI0D09119G, YALI0B02684G, YALI0D11418G, YALI0B08558G, YALI0D24079G, YALI0D19470G, YALI0B17556G, YALI0F31845G, YALI0D02607G, YALI0F23595G, YALI0E10879G, YALI0D25388G, YALI0C05038G, YALI0E06501G, YALI0F02299G, YALI0E13706G, YALI0D17204G, YALI0F02585G, YALI0A02717G, YALI0B0…	558	303	6434	1.21774	1	0.735469	90.6287
GOTERM_MF_FAT	GO:0005524~ATP binding	45	7.95053	0.263702	YALI0E25135G, YALI0D21010G, YALI0B01386G, YALI0E19074G, YALI0E07271G, YALI0C23749G, YALI0F15477G, YALI0D11770G, YALI0D25828G, YALI0E25201G, YALI0F12155G, YALI0D09119G, YALI0B07513G, YALI0D03333G, YALI0B02684G, YALI0B08558G, YALI0D11418G, YALI0D24079G, YALI0E27269G, YALI0D19470G, YALI0B17556G, YALI0D24431G, YALI0D02607G, YALI0F31845G, YALI0F23595G, YALI0E10879G, YALI0D25388G, YALI0C05038G, YALI0E0…	249	437	2705	1.11866	1	0.938091	98.3578
GOTERM_MF_FAT	GO:0032559~adenyl ribonucleotide binding	45	7.95053	0.274811	YALI0E25135G, YALI0D21010G, YALI0B01386G, YALI0E19074G, YALI0E07271G, YALI0C23749G, YALI0F15477G, YALI0D11770G, YALI0D25828G, YALI0E25201G, YALI0F12155G, YALI0D09119G, YALI0B07513G, YALI0D03333G, YALI0B02684G, YALI0B08558G, YALI0D11418G, YALI0D24079G, YALI0E27269G, YALI0D19470G, YALI0B17556G, YALI0D24431G, YALI0D02607G, YALI0F31845G, YALI0F23595G, YALI0E10879G, YALI0D25388G, YALI0C05038G, YALI0E0…	249	439	2705	1.11357	1	0.936583	98.6609
GOTERM_MF_FAT	GO:0000166~nucleotide binding	69	12.1908	0.3495	YALI0E19074G, YALI0F27181G, YALI0C23749G, YALI0D11770G, YALI0D25828G, YALI0E25201G, YALI0C19646G, YALI0F09009G, YALI0B08558G, YALI0D11418G, YALI0D24079G, YALI0D19470G, YALI0D02607G, YALI0F23595G, YALI0E10879G, YALI0D25388G, YALI0F30217G, YALI0B19998G, YALI0C05038G, YALI0E06501G, YALI0E33377G, YALI0F02299G, YALI0E33033G, YALI0D09603G, YALI0D07128G, YALI0F06292G, YALI0F08943G, YALI0B08778G, YALI0F0…	249	709	2705	1.05723	1	0.966861	99.6887
GOTERM_MF_FAT	GO:0001883~purine nucleoside binding	48	8.48057	0.375097	YALI0E25135G, YALI0D21010G, YALI0B01386G, YALI0E19074G, YALI0E07271G, YALI0C23749G, YALI0F15477G, YALI0D11770G, YALI0D25828G, YALI0E25201G, YALI0F12155G, YALI0D09119G, YALI0B07513G, YALI0D03333G, YALI0B02684G, YALI0B08558G, YALI0D11418G, YALI0D24079G, YALI0E27269G, YALI0D19470G, YALI0B17556G, YALI0D24431G, YALI0D02607G, YALI0F31845G, YALI0F23595G, YALI0E10879G, YALI0D25388G, YALI0C05038G, YALI0E0…	249	488	2705	1.06854	1	0.96854	99.8184
GOTERM_MF_FAT	GO:0030554~adenyl nucleotide binding	48	8.48057	0.375097	YALI0E25135G, YALI0D21010G, YALI0B01386G, YALI0E19074G, YALI0E07271G, YALI0C23749G, YALI0F15477G, YALI0D11770G, YALI0D25828G, YALI0E25201G, YALI0F12155G, YALI0D09119G, YALI0B07513G, YALI0D03333G, YALI0B02684G, YALI0B08558G, YALI0D11418G, YALI0D24079G, YALI0E27269G, YALI0D19470G, YALI0B17556G, YALI0D24431G, YALI0D02607G, YALI0F31845G, YALI0F23595G, YALI0E10879G, YALI0D25388G, YALI0C05038G, YALI0E0…	249	488	2705	1.06854	1	0.96854	99.8184
GOTERM_MF_FAT	GO:0001882~nucleoside binding	48	8.48057	0.418082	YALI0E25135G, YALI0D21010G, YALI0B01386G, YALI0E19074G, YALI0E07271G, YALI0C23749G, YALI0F15477G, YALI0D11770G, YALI0D25828G, YALI0E25201G, YALI0F12155G, YALI0D09119G, YALI0B07513G, YALI0D03333G, YALI0B02684G, YALI0B08558G, YALI0D11418G, YALI0D24079G, YALI0E27269G, YALI0D19470G, YALI0B17556G, YALI0D24431G, YALI0D02607G, YALI0F31845G, YALI0F23595G, YALI0E10879G, YALI0D25388G, YALI0C05038G, YALI0E0…	249	495	2705	1.05343	1	0.975712	99.9302
Annotation Cluster 10	Enrichment Score: 1.5261203147511102
Category	Term	Count	%	PValue	Genes	List Total	Pop Hits	Pop Total	Fold Enrichment	Bonferroni	Benjamini	FDR
GOTERM_CC_FAT	GO:0042579~microbody	7	1.23675	0.00391799	YALI0C01023G, YALI0F01012G, YALI0F10857G, YALI0E09405G, YALI0E18568G, YALI0D00891G, YALI0D26642G	78	23	1090	4.25307	0.275234	0.101746	4.10714
GOTERM_CC_FAT	GO:0005777~peroxisome	7	1.23675	0.00391799	YALI0C01023G, YALI0F01012G, YALI0F10857G, YALI0E09405G, YALI0E18568G, YALI0D00891G, YALI0D26642G	78	23	1090	4.25307	0.275234	0.101746	4.10714
INTERPRO	IPR006845:Pex, N-terminal	3	0.530035	0.0210995	YALI0C01023G, YALI0F01012G, YALI0D26642G	428	3	4938	11.5374	0.999999	0.62562	27.2451
GOTERM_BP_FAT	GO:0007031~peroxisome organization	4	0.706714	0.0508853	YALI0C01023G, YALI0F01012G, YALI0D00891G, YALI0D26642G	206	10	2326	4.5165	1	0.741755	50.8483
GOTERM_CC_FAT	GO:0005778~peroxisomal membrane	3	0.530035	0.061361	YALI0C01023G, YALI0F01012G, YALI0D26642G	78	6	1090	6.98718	0.994442	0.438394	49.1608
GOTERM_CC_FAT	GO:0031903~microbody membrane	3	0.530035	0.061361	YALI0C01023G, YALI0F01012G, YALI0D26642G	78	6	1090	6.98718	0.994442	0.438394	49.1608
GOTERM_CC_FAT	GO:0044439~peroxisomal part	3	0.530035	0.061361	YALI0C01023G, YALI0F01012G, YALI0D26642G	78	6	1090	6.98718	0.994442	0.438394	49.1608
GOTERM_CC_FAT	GO:0044438~microbody part	3	0.530035	0.061361	YALI0C01023G, YALI0F01012G, YALI0D26642G	78	6	1090	6.98718	0.994442	0.438394	49.1608
SP_PIR_KEYWORDS	peroxisome	4	0.706714	0.0787696	YALI0F01012G, YALI0F10857G, YALI0E18568G, YALI0D00891G	558	12	6434	3.84349	0.999979	0.511554	61.5864
Annotation Cluster 11	Enrichment Score: 1.478505553195394
Category	Term	Count	%	PValue	Genes	List Total	Pop Hits	Pop Total	Fold Enrichment	Bonferroni	Benjamini	FDR
INTERPRO	IPR001683:Phox-like	5	0.883392	0.0209886	YALI0A16797G, YALI0D07678G, YALI0F05456G, YALI0A03443G, YALI0E13904G	428	13	4938	4.43746	0.999999	0.650916	27.1221
UP_SEQ_FEATURE	domain:PX	3	0.530035	0.0224903	YALI0D07678G, YALI0F05456G, YALI0A03443G	54	3	589	10.9074	0.956678	0.956678	23.4874
COG_ONTOLOGY	Intracellular trafficking and secretion / General function prediction only	3	0.530035	0.0251082	YALI0D07678G, YALI0A03443G, YALI0E13904G	79	3	821	10.3924	0.496704	0.290566	18.9961
GOTERM_MF_FAT	GO:0035091~phosphoinositide binding	5	0.883392	0.0330303	YALI0A16797G, YALI0D07678G, YALI0F05456G, YALI0A03443G, YALI0E13904G	249	14	2705	3.8798	0.999969	0.549935	36.2921
GOTERM_MF_FAT	GO:0008289~lipid binding	6	1.06007	0.0447652	YALI0A16797G, YALI0D07678G, YALI0F05456G, YALI0A03443G, YALI0F05148G, YALI0E13904G	249	22	2705	2.96276	0.999999	0.636083	45.9229
SMART	SM00312:PX	5	0.883392	0.0491059	YALI0A16797G, YALI0D07678G, YALI0F05456G, YALI0A03443G, YALI0E13904G	173	13	1528	3.39707	0.99316	0.712412	42.7546
GOTERM_MF_FAT	GO:0005543~phospholipid binding	5	0.883392	0.0519615	YALI0A16797G, YALI0D07678G, YALI0F05456G, YALI0A03443G, YALI0E13904G	249	16	2705	3.39483	1	0.666869	51.1427
Annotation Cluster 12	Enrichment Score: 1.4277732111722083
Category	Term	Count	%	PValue	Genes	List Total	Pop Hits	Pop Total	Fold Enrichment	Bonferroni	Benjamini	FDR
INTERPRO	IPR001806:Ras GTPase	8	1.41343	0.00530582	YALI0F07491G, YALI0E23001G, YALI0F27181G, YALI0D01045G, YALI0E23067G, YALI0D07128G, YALI0F23529G, YALI0A04367G	428	26	4938	3.54996	0.967657	0.317002	7.62826
PIR_SUPERFAMILY	PIRSF001710:Ras-related protein Rab	4	0.706714	0.00548141	YALI0F27181G, YALI0E23067G, YALI0F23529G, YALI0A04367G	109	5	1253	9.19633	0.485765	0.282898	6.12356
INTERPRO	IPR003579:Ras small GTPase, Rab type	5	0.883392	0.00759307	YALI0F27181G, YALI0E23067G, YALI0D07128G, YALI0F23529G, YALI0A04367G	428	10	4938	5.76869	0.992673	0.388366	10.7461
GOTERM_BP_FAT	GO:0007264~small GTPase mediated signal transduction	9	1.59011	0.011028	YALI0F07491G, YALI0E07986G, YALI0E23001G, YALI0F27181G, YALI0D01045G, YALI0E23067G, YALI0D07128G, YALI0F23529G, YALI0A04367G	206	36	2326	2.82282	0.976177	0.288041	13.9991
INTERPRO	IPR013753:Ras	7	1.23675	0.0141503	YALI0E23001G, YALI0F27181G, YALI0D01045G, YALI0E23067G, YALI0D07128G, YALI0F23529G, YALI0A04367G	428	24	4938	3.36507	0.999898	0.566407	19.1492
SMART	SM00175:RAB	5	0.883392	0.0188799	YALI0F27181G, YALI0E23067G, YALI0D07128G, YALI0F23529G, YALI0A04367G	173	10	1528	4.41618	0.848472	0.610734	19.0354
INTERPRO	IPR015599:Rab5-related	3	0.530035	0.0210995	YALI0F27181G, YALI0D07128G, YALI0A04367G	428	3	4938	11.5374	0.999999	0.62562	27.2451
GOTERM_BP_FAT	GO:0007242~intracellular signaling cascade	9	1.59011	0.0891535	YALI0F07491G, YALI0E07986G, YALI0E23001G, YALI0F27181G, YALI0D01045G, YALI0E23067G, YALI0D07128G, YALI0F23529G, YALI0A04367G	206	53	2326	1.91738	1	0.877293	71.9158
INTERPRO	IPR005225:Small GTP-binding protein	7	1.23675	0.163076	YALI0E23001G, YALI0F27181G, YALI0D01045G, YALI0E23067G, YALI0D07128G, YALI0F23529G, YALI0A04367G	428	43	4938	1.87818	1	0.980926	92.972
GOTERM_MF_FAT	GO:0032561~guanyl ribonucleotide binding	12	2.12014	0.187505	YALI0F07491G, YALI0F30217G, YALI0E23001G, YALI0F27181G, YALI0D01045G, YALI0E23067G, YALI0D07128G, YALI0F09009G, YALI0C24013G, YALI0D09713G, YALI0F23529G, YALI0A04367G	249	89	2705	1.46474	1	0.873783	93.8411
GOTERM_MF_FAT	GO:0005525~GTP binding	12	2.12014	0.187505	YALI0F07491G, YALI0F30217G, YALI0E23001G, YALI0F27181G, YALI0D01045G, YALI0E23067G, YALI0D07128G, YALI0F09009G, YALI0C24013G, YALI0D09713G, YALI0F23529G, YALI0A04367G	249	89	2705	1.46474	1	0.873783	93.8411
GOTERM_MF_FAT	GO:0019001~guanyl nucleotide binding	12	2.12014	0.187505	YALI0F07491G, YALI0F30217G, YALI0E23001G, YALI0F27181G, YALI0D01045G, YALI0E23067G, YALI0D07128G, YALI0F09009G, YALI0C24013G, YALI0D09713G, YALI0F23529G, YALI0A04367G	249	89	2705	1.46474	1	0.873783	93.8411
SP_PIR_KEYWORDS	gtp-binding	10	1.76678	0.208826	YALI0F07491G, YALI0F30217G, YALI0E23001G, YALI0F27181G, YALI0D01045G, YALI0E23067G, YALI0D07128G, YALI0D09713G, YALI0F23529G, YALI0A04367G	558	76	6434	1.51717	1	0.768041	93.488
Downregulated genes
Annotation Cluster 1	Enrichment Score: 8.380678462014167
Category	Term	Count	%	PValue	Genes	List Total	Pop Hits	Pop Total	Fold Enrichment	Bonferroni	Benjamini	FDR
KEGG_PATHWAY	yli03010:Ribosome	38	5.95611	3.28394e-19	YALI0D24387G, YALI0E31911G, YALI0E23562G, YALI0F05544G, YALI0A09922G, YALI0B15103G, YALI0D13728G, YALI0B21076G, YALI0E00550G, YALI0E22352G, YALI0F05676G, YALI0F25399G, YALI0B20504G, YALI0F05803G, YALI0E34573G, YALI0F14465G, YALI0B12848G, YALI0F20482G, YALI0E24475G, YALI0E20581G, YALI0E30811G, YALI0F25531G, YALI0E29073G, YALI0F24695G, YALI0B08866G, YALI0A10725G, YALI0F31405G, YALI0F24739G, YALI0D2…	116	79	1167	4.83915	1.839e-17	1.839e-17	3.24268e-16
GOTERM_MF_FAT	GO:0003735~structural constituent of ribosome	39	6.11285	1.80271e-11	YALI0D24387G, YALI0E31911G, YALI0E23562G, YALI0F05544G, YALI0A09922G, YALI0B15103G, YALI0D13728G, YALI0B21076G, YALI0E00550G, YALI0E22352G, YALI0F05676G, YALI0F25399G, YALI0B20504G, YALI0F05803G, YALI0E34573G, YALI0F14465G, YALI0B12848G, YALI0F20482G, YALI0E24475G, YALI0E20581G, YALI0E30811G, YALI0F25531G, YALI0E29073G, YALI0E14212G, YALI0B08866G, YALI0A10725G, YALI0F31405G, YALI0F24739G, YALI0D2…	271	121	2705	3.21719	4.83124e-09	4.83124e-09	2.36748e-08
GOTERM_CC_FAT	GO:0030529~ribonucleoprotein complex	51	7.99373	4.02021e-11	YALI0D24387G, YALI0E23562G, YALI0F15807G, YALI0B21076G, YALI0E00550G, YALI0B20504G, YALI0B12848G, YALI0E18854G, YALI0F25531G, YALI0D13464G, YALI0F24497G, YALI0E29073G, YALI0A10725G, YALI0B08866G, YALI0C00913G, YALI0F24739G, YALI0E21219G, YALI0E27830G, YALI0B05896G, YALI0F11055G, YALI0C03784G, YALI0E32208G, YALI0E31911G, YALI0B12276G, YALI0B15103G, YALI0A09922G, YALI0F05544G, YALI0D13728G, YALI0E2…	132	176	1090	2.39282	3.21617e-09	3.21617e-09	4.27396e-08
GOTERM_MF_FAT	GO:0005198~structural molecule activity	39	6.11285	1.10012e-09	YALI0D24387G, YALI0E31911G, YALI0E23562G, YALI0F05544G, YALI0A09922G, YALI0B15103G, YALI0D13728G, YALI0B21076G, YALI0E00550G, YALI0E22352G, YALI0F05676G, YALI0F25399G, YALI0B20504G, YALI0F05803G, YALI0E34573G, YALI0F14465G, YALI0B12848G, YALI0F20482G, YALI0E24475G, YALI0E20581G, YALI0E30811G, YALI0F25531G, YALI0E29073G, YALI0E14212G, YALI0B08866G, YALI0A10725G, YALI0F31405G, YALI0F24739G, YALI0D2…	271	137	2705	2.84146	2.94831e-07	1.47416e-07	1.44478e-06
GOTERM_CC_FAT	GO:0005840~ribosome	39	6.11285	2.61892e-09	YALI0D24387G, YALI0E31911G, YALI0E23562G, YALI0F05544G, YALI0A09922G, YALI0B15103G, YALI0D13728G, YALI0B21076G, YALI0E00550G, YALI0E22352G, YALI0F05676G, YALI0F25399G, YALI0B20504G, YALI0F05803G, YALI0E34573G, YALI0F14465G, YALI0B12848G, YALI0F20482G, YALI0E24475G, YALI0E20581G, YALI0E30811G, YALI0F25531G, YALI0E29073G, YALI0E14212G, YALI0B08866G, YALI0A10725G, YALI0F31405G, YALI0F24739G, YALI0D2…	132	125	1090	2.57636	2.09514e-07	1.04757e-07	2.78422e-06
GOTERM_CC_FAT	GO:0043228~non-membrane-bounded organelle	61	9.56113	1.40712e-07	YALI0D24387G, YALI0E23562G, YALI0D26103G, YALI0F19162G, YALI0B21076G, YALI0E00550G, YALI0D09251G, YALI0B20504G, YALI0B12848G, YALI0F13101G, YALI0F25531G, YALI0F08371G, YALI0F24497G, YALI0F31493G, YALI0E29073G, YALI0A10725G, YALI0B08866G, YALI0B23342G, YALI0E01122G, YALI0E27808G, YALI0F24739G, YALI0E21219G, YALI0E27830G, YALI0D09449G, YALI0F18238G, YALI0B05896G, YALI0F11055G, YALI0C03784G, YALI0E3…	132	284	1090	1.77363	1.12569e-05	2.81423e-06	0.000149593
GOTERM_CC_FAT	GO:0043232~intracellular non-membrane-bounded organelle	61	9.56113	1.40712e-07	YALI0D24387G, YALI0E23562G, YALI0D26103G, YALI0F19162G, YALI0B21076G, YALI0E00550G, YALI0D09251G, YALI0B20504G, YALI0B12848G, YALI0F13101G, YALI0F25531G, YALI0F08371G, YALI0F24497G, YALI0F31493G, YALI0E29073G, YALI0A10725G, YALI0B08866G, YALI0B23342G, YALI0E01122G, YALI0E27808G, YALI0F24739G, YALI0E21219G, YALI0E27830G, YALI0D09449G, YALI0F18238G, YALI0B05896G, YALI0F11055G, YALI0C03784G, YALI0E3…	132	284	1090	1.77363	1.12569e-05	2.81423e-06	0.000149593
SP_PIR_KEYWORDS	ribonucleoprotein	20	3.1348	1.44993e-05	YALI0D24387G, YALI0E31911G, YALI0E23562G, YALI0B12276G, YALI0D20614G, YALI0F05544G, YALI0D13728G, YALI0E27830G, YALI0D12903G, YALI0D05731G, YALI0F25399G, YALI0F05676G, YALI0F05803G, YALI0B12848G, YALI0B05896G, YALI0B14146G, YALI0F20482G, YALI0F25531G, YALI0B18326G, YALI0F24497G	634	67	6434	3.02933	0.00176736	0.000589467	0.0166927
SP_PIR_KEYWORDS	ribosomal protein	17	2.66458	7.84881e-05	YALI0D24387G, YALI0E31911G, YALI0E23562G, YALI0D20614G, YALI0F05544G, YALI0D13728G, YALI0E27830G, YALI0D12903G, YALI0D05731G, YALI0F25399G, YALI0F05676G, YALI0F05803G, YALI0B12848G, YALI0B05896G, YALI0B14146G, YALI0F20482G, YALI0F25531G	634	57	6434	3.02668	0.00953022	0.00239112	0.0903313
GOTERM_BP_FAT	GO:0006412~translation	40	6.26959	0.000100989	YALI0D24387G, YALI0E31911G, YALI0E23562G, YALI0F05544G, YALI0A09922G, YALI0B15103G, YALI0D13728G, YALI0B21076G, YALI0E00550G, YALI0E22352G, YALI0F05676G, YALI0F25399G, YALI0B20504G, YALI0F05803G, YALI0E34573G, YALI0F14465G, YALI0B12848G, YALI0F20482G, YALI0E24475G, YALI0E20581G, YALI0E30811G, YALI0F25531G, YALI0B12562G, YALI0E29073G, YALI0E14212G, YALI0B08866G, YALI0A10725G, YALI0F31405G, YALI0F2…	248	204	2326	1.83903	0.0389134	0.0065933	0.140407
Annotation Cluster 2	Enrichment Score: 6.4960049457705615
Category	Term	Count	%	PValue	Genes	List Total	Pop Hits	Pop Total	Fold Enrichment	Bonferroni	Benjamini	FDR
GOTERM_BP_FAT	GO:0042254~ribosome biogenesis	35	5.48589	2.87285e-16	YALI0E27715G, YALI0D13948G, YALI0B12276G, YALI0B07161G, YALI0E34287G, YALI0D23133G, YALI0D09251G, YALI0B10560G, YALI0B08756G, YALI0F13101G, YALI0F08371G, YALI0D13464G, YALI0F31493G, YALI0D08668G, YALI0E00770G, YALI0F24497G, YALI0F24695G, YALI0B10065G, YALI0C00913G, YALI0B23342G, YALI0F15235G, YALI0E01122G, YALI0C24057G, YALI0C21846G, YALI0D19624G, YALI0A12067G, YALI0B09779G, YALI0F05918G, YALI0F1…	248	70	2326	4.68952	1.30895e-13	1.30895e-13	4.66294e-13
GOTERM_BP_FAT	GO:0022613~ribonucleoprotein complex biogenesis	35	5.48589	2.87285e-16	YALI0E27715G, YALI0D13948G, YALI0B12276G, YALI0B07161G, YALI0E34287G, YALI0D23133G, YALI0D09251G, YALI0B10560G, YALI0B08756G, YALI0F13101G, YALI0F08371G, YALI0D13464G, YALI0F31493G, YALI0D08668G, YALI0E00770G, YALI0F24497G, YALI0F24695G, YALI0B10065G, YALI0C00913G, YALI0B23342G, YALI0F15235G, YALI0E01122G, YALI0C24057G, YALI0C21846G, YALI0D19624G, YALI0A12067G, YALI0B09779G, YALI0F05918G, YALI0F1…	248	70	2326	4.68952	1.30895e-13	1.30895e-13	4.66294e-13
SP_PIR_KEYWORDS	ribosome biogenesis	19	2.97806	9.80843e-10	YALI0E27715G, YALI0D13948G, YALI0E01122G, YALI0F15235G, YALI0B23342G, YALI0D19624G, YALI0D23133G, YALI0B09779G, YALI0F05918G, YALI0D09251G, YALI0F18238G, YALI0D09449G, YALI0F28083G, YALI0F13101G, YALI0F08371G, YALI0B18326G, YALI0B16896G, YALI0F31493G, YALI0F24497G	634	36	6434	5.35603	1.19663e-07	1.19663e-07	1.12931e-06
GOTERM_BP_FAT	GO:0016072~rRNA metabolic process	24	3.76176	1.24372e-09	YALI0E27715G, YALI0B10065G, YALI0D13948G, YALI0C00913G, YALI0F15235G, YALI0B23342G, YALI0B12276G, YALI0C24057G, YALI0B07161G, YALI0D23133G, YALI0F05918G, YALI0D09251G, YALI0B10560G, YALI0F18238G, YALI0D09449G, YALI0C03784G, YALI0F13101G, YALI0F08371G, YALI0B18326G, YALI0D13464G, YALI0E00770G, YALI0F31493G, YALI0D08668G, YALI0F24497G	248	55	2326	4.09267	4.88783e-07	2.44391e-07	1.73029e-06
GOTERM_BP_FAT	GO:0006364~rRNA processing	24	3.76176	1.24372e-09	YALI0E27715G, YALI0B10065G, YALI0D13948G, YALI0C00913G, YALI0F15235G, YALI0B23342G, YALI0B12276G, YALI0C24057G, YALI0B07161G, YALI0D23133G, YALI0F05918G, YALI0D09251G, YALI0B10560G, YALI0F18238G, YALI0D09449G, YALI0C03784G, YALI0F13101G, YALI0F08371G, YALI0B18326G, YALI0D13464G, YALI0E00770G, YALI0F31493G, YALI0D08668G, YALI0F24497G	248	55	2326	4.09267	4.88783e-07	2.44391e-07	1.73029e-06
GOTERM_BP_FAT	GO:0034470~ncRNA processing	30	4.70219	1.0884e-08	YALI0E26059G, YALI0E27715G, YALI0D13948G, YALI0B12276G, YALI0B07161G, YALI0D23133G, YALI0E29007G, YALI0D09251G, YALI0B10560G, YALI0F22737G, YALI0F08921G, YALI0F13101G, YALI0F08371G, YALI0D13464G, YALI0E00770G, YALI0F31493G, YALI0D08668G, YALI0F24497G, YALI0B10065G, YALI0C00913G, YALI0B23342G, YALI0F15235G, YALI0C24057G, YALI0E26048G, YALI0B21516G, YALI0F05918G, YALI0F18238G, YALI0D09449G, YALI0C0…	248	90	2326	3.12634	4.27739e-06	1.4258e-06	1.5142e-05
GOTERM_CC_FAT	GO:0005730~nucleolus	20	3.1348	2.35635e-08	YALI0E01122G, YALI0F15235G, YALI0B23342G, YALI0E27808G, YALI0B07161G, YALI0D19624G, YALI0D23133G, YALI0B09779G, YALI0F05918G, YALI0D09251G, YALI0F18238G, YALI0D09449G, YALI0F28083G, YALI0C03784G, YALI0F13101G, YALI0F08371G, YALI0B18326G, YALI0B16896G, YALI0F31493G, YALI0F24497G	132	41	1090	4.02809	1.88508e-06	6.28359e-07	2.50507e-05
GOTERM_BP_FAT	GO:0006396~RNA processing	42	6.58307	9.3201e-08	YALI0E26059G, YALI0E31911G, YALI0E27715G, YALI0D13948G, YALI0F15807G, YALI0B14905G, YALI0B12276G, YALI0F20438G, YALI0B07161G, YALI0D23133G, YALI0E29007G, YALI0D09251G, YALI0B10560G, YALI0E13486G, YALI0F22737G, YALI0C11429G, YALI0E18854G, YALI0F08921G, YALI0F13101G, YALI0F08371G, YALI0D13464G, YALI0F24497G, YALI0F31493G, YALI0D08668G, YALI0E00770G, YALI0F20240G, YALI0E10109G, YALI0B10065G, YALI0C0…	248	169	2326	2.33088	3.66273e-05	9.15695e-06	0.000129663
SP_PIR_KEYWORDS	rrna processing	17	2.66458	4.21093e-07	YALI0E27715G, YALI0D13948G, YALI0F15235G, YALI0B23342G, YALI0B12276G, YALI0B07161G, YALI0D23133G, YALI0F05918G, YALI0D09251G, YALI0F18238G, YALI0D09449G, YALI0F13101G, YALI0F08371G, YALI0B18326G, YALI0E00770G, YALI0F24497G, YALI0F31493G	634	40	6434	4.31301	5.13721e-05	2.56864e-05	0.000484832
GOTERM_BP_FAT	GO:0034660~ncRNA metabolic process	30	4.70219	1.91384e-05	YALI0E26059G, YALI0E27715G, YALI0D13948G, YALI0B12276G, YALI0B07161G, YALI0D23133G, YALI0E29007G, YALI0D09251G, YALI0B10560G, YALI0F22737G, YALI0F08921G, YALI0F13101G, YALI0F08371G, YALI0D13464G, YALI0E00770G, YALI0F31493G, YALI0D08668G, YALI0F24497G, YALI0B10065G, YALI0C00913G, YALI0B23342G, YALI0F15235G, YALI0C24057G, YALI0E26048G, YALI0B21516G, YALI0F05918G, YALI0F18238G, YALI0D09449G, YALI0C0…	248	124	2326	2.26912	0.00749325	0.00150316	0.0266225
GOTERM_CC_FAT	GO:0031981~nuclear lumen	20	3.1348	0.000606147	YALI0E01122G, YALI0F15235G, YALI0B23342G, YALI0E27808G, YALI0B07161G, YALI0D19624G, YALI0D23133G, YALI0B09779G, YALI0F05918G, YALI0D09251G, YALI0F18238G, YALI0D09449G, YALI0F28083G, YALI0C03784G, YALI0F13101G, YALI0F08371G, YALI0B18326G, YALI0B16896G, YALI0F31493G, YALI0F24497G	132	74	1090	2.23178	0.0473488	0.00965439	0.642527
GOTERM_CC_FAT	GO:0043233~organelle lumen	22	3.44828	0.00143591	YALI0E01122G, YALI0F15235G, YALI0B23342G, YALI0E27808G, YALI0B07161G, YALI0D19624G, YALI0D23133G, YALI0B09779G, YALI0F20504G, YALI0F05918G, YALI0B09647G, YALI0D09251G, YALI0F18238G, YALI0D09449G, YALI0F28083G, YALI0C03784G, YALI0F13101G, YALI0F08371G, YALI0B18326G, YALI0B16896G, YALI0F31493G, YALI0F24497G	132	91	1090	1.99634	0.108594	0.0189768	1.51602
GOTERM_CC_FAT	GO:0070013~intracellular organelle lumen	22	3.44828	0.00143591	YALI0E01122G, YALI0F15235G, YALI0B23342G, YALI0E27808G, YALI0B07161G, YALI0D19624G, YALI0D23133G, YALI0B09779G, YALI0F20504G, YALI0F05918G, YALI0B09647G, YALI0D09251G, YALI0F18238G, YALI0D09449G, YALI0F28083G, YALI0C03784G, YALI0F13101G, YALI0F08371G, YALI0B18326G, YALI0B16896G, YALI0F31493G, YALI0F24497G	132	91	1090	1.99634	0.108594	0.0189768	1.51602
GOTERM_CC_FAT	GO:0031974~membrane-enclosed lumen	22	3.44828	0.00442627	YALI0E01122G, YALI0F15235G, YALI0B23342G, YALI0E27808G, YALI0B07161G, YALI0D19624G, YALI0D23133G, YALI0B09779G, YALI0F20504G, YALI0F05918G, YALI0B09647G, YALI0D09251G, YALI0F18238G, YALI0D09449G, YALI0F28083G, YALI0C03784G, YALI0F13101G, YALI0F08371G, YALI0B18326G, YALI0B16896G, YALI0F31493G, YALI0F24497G	132	99	1090	1.83502	0.298748	0.0494345	4.6066
SP_PIR_KEYWORDS	nucleus	35	5.48589	0.240975	YALI0F04664G, YALI0B06512G, YALI0C05599G, YALI0E27715G, YALI0D13948G, YALI0B12276G, YALI0F21945G, YALI0B07161G, YALI0D23133G, YALI0D09251G, YALI0E26367G, YALI0C11231G, YALI0F22737G, YALI0F28215G, YALI0F13101G, YALI0F08371G, YALI0F31493G, YALI0F24497G, YALI0A01375G, YALI0B23342G, YALI0F15235G, YALI0E01122G, YALI0E27808G, YALI0E26048G, YALI0D19624G, YALI0B09779G, YALI0A08129G, YALI0F05918G, YALI0F1…	634	305	6434	1.16455	1	0.965396	95.8187
SP_PIR_KEYWORDS	coiled coil	8	1.25392	0.36031	YALI0D09251G, YALI0B23342G, YALI0F18238G, YALI0B07161G, YALI0D19624G, YALI0B16896G, YALI0F13101G, YALI0F05918G	634	59	6434	1.37604	1	0.984896	99.4166
Annotation Cluster 3	Enrichment Score: 1.8884422846468016
Category	Term	Count	%	PValue	Genes	List Total	Pop Hits	Pop Total	Fold Enrichment	Bonferroni	Benjamini	FDR
GOTERM_MF_FAT	GO:0019843~rRNA binding	6	0.940439	0.000415613	YALI0E29073G, YALI0C24057G, YALI0F05544G, YALI0F17380G, YALI0D12903G, YALI0E22352G	271	8	2705	7.48616	0.105426	0.0274675	0.544449
SMART	SM00363:S4	3	0.470219	0.0622671	YALI0F05544G, YALI0F17380G, YALI0D12903G	133	5	1528	6.89323	0.995766	0.995766	49.9266
INTERPRO	IPR002942:RNA-binding S4	3	0.470219	0.0835075	YALI0F05544G, YALI0F17380G, YALI0D12903G	502	5	4938	5.90199	1	0.991789	73.6065

## Sheet:  upc2Δ Normox-v-Wildtype Normox
Gene enrichment in upc2 cells compared to wildtype cells growing in normoxia
Upregulated genes
Category	Term	Count	%	PValue	Genes	List Total	Pop Hits	Pop Total	Fold Enrichment	Bonferroni	Benjamini	FDR
GOTERM_MF_FAT	GO:0008233~peptidase activity	20	8.19672	5.94052e-05	YALI0B14641G, YALI0F11033G, YALI0B02838G, YALI0B01386G, YALI0D17446G, YALI0B05258G, YALI0B06754G, YALI0F11077G, YALI0B11594G, YALI0B13310G, YALI0D08052G, YALI0F17974G, YALI0F08613G, YALI0B05654G, YALI0B05104G, YALI0B05522G, YALI0B09427G, YALI0B01408G, YALI0F11803G, YALI0F09163G	112	175	2705	2.7602	0.0104599	0.0104599	0.0729424
GOTERM_MF_FAT	GO:0008237~metallopeptidase activity	9	3.68852	0.000160204	YALI0B14641G, YALI0B13310G, YALI0F11033G, YALI0B01386G, YALI0F08613G, YALI0D17446G, YALI0B05522G, YALI0B09427G, YALI0B11594G	112	40	2705	5.43415	0.0279601	0.0140791	0.196599
GOTERM_MF_FAT	GO:0070011~peptidase activity, acting on L-amino acid peptides	18	7.37705	0.000292121	YALI0B14641G, YALI0F11033G, YALI0B02838G, YALI0B01386G, YALI0D17446G, YALI0B06754G, YALI0F11077G, YALI0B11594G, YALI0B13310G, YALI0D08052G, YALI0F17974G, YALI0F08613G, YALI0B05654G, YALI0B05522G, YALI0B09427G, YALI0B01408G, YALI0F11803G, YALI0F09163G	112	165	2705	2.63474	0.0503986	0.0170899	0.358219
GOTERM_BP_FAT	GO:0006508~proteolysis	19	7.78689	0.000637977	YALI0B14641G, YALI0F11033G, YALI0B02838G, YALI0B01386G, YALI0D17446G, YALI0B05258G, YALI0B06754G, YALI0B11594G, YALI0B13310G, YALI0D08052G, YALI0F17974G, YALI0F08613G, YALI0B05654G, YALI0B05104G, YALI0B05522G, YALI0B09427G, YALI0B01408G, YALI0F11803G, YALI0F09163G	87	216	2326	2.35175	0.120949	0.120949	0.797995
GOTERM_MF_FAT	GO:0004175~endopeptidase activity	8	3.27869	0.178934	YALI0F11033G, YALI0B01386G, YALI0F17974G, YALI0F08613G, YALI0B06754G, YALI0B05654G, YALI0F11077G, YALI0F09163G	112	113	2705	1.70986	1	0.871612	91.122
Annotation Cluster 2	Enrichment Score: 1.427932320869562
Category	Term	Count	%	PValue	Genes	List Total	Pop Hits	Pop Total	Fold Enrichment	Bonferroni	Benjamini	FDR
GOTERM_MF_FAT	GO:0008238~exopeptidase activity	5	2.04918	0.00782109	YALI0B13310G, YALI0D08052G, YALI0B05522G, YALI0B01408G, YALI0F11803G	112	20	2705	6.03795	0.750869	0.293508	9.19387
GOTERM_MF_FAT	GO:0004180~carboxypeptidase activity	4	1.63934	0.0087204	YALI0B13310G, YALI0D08052G, YALI0B01408G, YALI0F11803G	112	11	2705	8.78247	0.787811	0.266594	10.1997
INTERPRO	IPR001563:Peptidase S10, serine carboxypeptidase	3	1.22951	0.0571879	YALI0D08052G, YALI0B01408G, YALI0F11803G	197	10	4938	7.5198	1	0.999313	55.6198
INTERPRO	IPR018202:Peptidase S10, serine carboxypeptidase, active site	3	1.22951	0.0571879	YALI0D08052G, YALI0B01408G, YALI0F11803G	197	10	4938	7.5198	1	0.999313	55.6198
GOTERM_MF_FAT	GO:0070008~serine-type exopeptidase activity	3	1.22951	0.0605557	YALI0D08052G, YALI0B01408G, YALI0F11803G	112	10	2705	7.24554	0.999984	0.669008	53.5723
GOTERM_MF_FAT	GO:0004185~serine-type carboxypeptidase activity	3	1.22951	0.0605557	YALI0D08052G, YALI0B01408G, YALI0F11803G	112	10	2705	7.24554	0.999984	0.669008	53.5723
GOTERM_MF_FAT	GO:0017171~serine hydrolase activity	5	2.04918	0.0679062	YALI0D08052G, YALI0B02838G, YALI0F11077G, YALI0B01408G, YALI0F11803G	112	38	2705	3.17787	0.999996	0.677465	57.8425
GOTERM_MF_FAT	GO:0008236~serine-type peptidase activity	5	2.04918	0.0679062	YALI0D08052G, YALI0B02838G, YALI0F11077G, YALI0B01408G, YALI0F11803G	112	38	2705	3.17787	0.999996	0.677465	57.8425
Downregulated genes
Annotation Cluster 1	Enrichment Score: 2.5727434609179207
Category	Term	Count	%	PValue	Genes	List Total	Pop Hits	Pop Total	Fold Enrichment	Bonferroni	Benjamini	FDR
KEGG_PATHWAY	yli00100:Steroid biosynthesis	4	6.66667	4.69e-05	YALI0D20878G, YALI0B17204G, YALI0E32065G, YALI0B17644G	8	14	1167	41.6786	0.00089	0.00089	0.0351187
GOTERM_BP_FAT	GO:0006694~steroid biosynthetic process	3	5	0.0010337	YALI0B17204G, YALI0E32065G, YALI0B17644G	18	7	2326	55.381	0.0325539	0.0325539	0.891735
GOTERM_BP_FAT	GO:0008202~steroid metabolic process	3	5	0.00266109	YALI0B17204G, YALI0E32065G, YALI0B17644G	18	11	2326	35.2424	0.0817341	0.0417381	2.28137
GOTERM_BP_FAT	GO:0008610~lipid biosynthetic process	4	6.66667	0.00857888	YALI0D20878G, YALI0B17204G, YALI0E32065G, YALI0B17644G	18	60	2326	8.61481	0.240966	0.0666053	7.19045
GOTERM_CC_FAT	GO:0005783~endoplasmic reticulum	3	5	0.123746	YALI0D20878G, YALI0B17204G, YALI0E32065G	9	85	1090	4.27451	0.695443	0.695443	53.2443

## Sheet: sre1Δ Normox-v-Wildtype Normox
Gene enrichment in sre1 cells compared to wildtype cells growing in normoxia
Upregulated
Annotation Cluster 1	Enrichment Score: 2.562164662287329
Category	Term	Count	%	PValue	Genes	List Total	Pop Hits	Pop Total	Fold Enrichment	Bonferroni	Benjamini	FDR
COG_ONTOLOGY	Lipid metabolism	9	8.41121	4.39013e-07	YALI0E12573G, YALI0F23749G, YALI0F26587G, YALI0E12595G, YALI0C16797G, YALI0B14619G, YALI0D15708G, YALI0F22121G, YALI0B10406G	25	29	821	10.1917	3.95111e-06	3.95111e-06	0.000252652
GOTERM_MF_FAT	GO:0048037~cofactor binding	16	14.9533	1.6805e-06	YALI0E12573G, YALI0C16797G, YALI0E28787G, YALI0D12661G, YALI0C18315G, YALI0E03212G, YALI0C08811G, YALI0D23815G, YALI0D06325G, YALI0F23749G, YALI0E13420G, YALI0F02607G, YALI0D06930G, YALI0E20977G, YALI0D15708G, YALI0E18502G	53	194	2705	4.2093	0.000184838	0.000184838	0.00189865
INTERPRO	IPR006092:Acyl-CoA dehydrogenase, N-terminal	4	3.73832	1.68149e-05	YALI0E12573G, YALI0F23749G, YALI0C16797G, YALI0D15708G	82	4	4938	60.2195	0.00307242	0.00307242	0.0207669
GOTERM_MF_FAT	GO:0050662~coenzyme binding	12	11.215	4.36642e-05	YALI0E03212G, YALI0C08811G, YALI0E12573G, YALI0D23815G, YALI0F23749G, YALI0E13420G, YALI0F02607G, YALI0C16797G, YALI0D06930G, YALI0D12661G, YALI0D15708G, YALI0E18502G	53	139	2705	4.40614	0.00479165	0.0023987	0.0493219
INTERPRO	IPR006090:Acyl-CoA oxidase/dehydrogenase, type 1	4	3.73832	0.000469691	YALI0E12573G, YALI0F23749G, YALI0C16797G, YALI0D15708G	82	10	4938	24.0878	0.0823815	0.0420759	0.578593
INTERPRO	IPR006091:Acyl-CoA oxidase/dehydrogenase, central region	4	3.73832	0.000469691	YALI0E12573G, YALI0F23749G, YALI0C16797G, YALI0D15708G	82	10	4938	24.0878	0.0823815	0.0420759	0.578593
INTERPRO	IPR013786:Acyl-CoA dehydrogenase/oxidase, N-terminal	4	3.73832	0.000469691	YALI0E12573G, YALI0F23749G, YALI0C16797G, YALI0D15708G	82	10	4938	24.0878	0.0823815	0.0420759	0.578593
INTERPRO	IPR013764:Acyl-CoA oxidase/dehydrogenase, type1/2, C-terminal	4	3.73832	0.000638203	YALI0E12573G, YALI0F23749G, YALI0C16797G, YALI0D15708G	82	11	4938	21.898	0.110262	0.0381943	0.785427
GOTERM_MF_FAT	GO:0003995~acyl-CoA dehydrogenase activity	4	3.73832	0.000731396	YALI0E12573G, YALI0F23749G, YALI0C16797G, YALI0D15708G	53	10	2705	20.4151	0.0773294	0.026471	0.823244
GOTERM_MF_FAT	GO:0050660~FAD binding	6	5.60748	0.00197785	YALI0E03212G, YALI0E12573G, YALI0F23749G, YALI0E13420G, YALI0C16797G, YALI0D15708G	53	48	2705	6.37972	0.195697	0.0529891	2.212
GOTERM_MF_FAT	GO:0009055~electron carrier activity	8	7.47664	0.00382603	YALI0E12573G, YALI0F23749G, YALI0E13420G, YALI0C16797G, YALI0D12661G, YALI0D15708G, YALI0B21824G, YALI0E25982G	53	107	2705	3.81591	0.34405	0.0808759	4.23859
SP_PIR_KEYWORDS	FAD	3	2.80374	0.0300524	YALI0E12573G, YALI0F23749G, YALI0D15708G	105	17	6434	10.8134	0.775784	0.392487	25.3649
SP_PIR_KEYWORDS	Flavoprotein	3	2.80374	0.0370069	YALI0E12573G, YALI0F23749G, YALI0D15708G	105	19	6434	9.67519	0.842408	0.369937	30.3407
GOTERM_MF_FAT	GO:0030554~adenyl nucleotide binding	9	8.41121	0.746679	YALI0E03212G, YALI0E12573G, YALI0F23749G, YALI0E13420G, YALI0C16995G, YALI0C16797G, YALI0B14619G, YALI0D15708G, YALI0D24431G	53	488	2705	0.94127	1	0.999921	100
GOTERM_MF_FAT	GO:0001883~purine nucleoside binding	9	8.41121	0.746679	YALI0E03212G, YALI0E12573G, YALI0F23749G, YALI0E13420G, YALI0C16995G, YALI0C16797G, YALI0B14619G, YALI0D15708G, YALI0D24431G	53	488	2705	0.94127	1	0.999921	100
GOTERM_MF_FAT	GO:0001882~nucleoside binding	9	8.41121	0.761727	YALI0E03212G, YALI0E12573G, YALI0F23749G, YALI0E13420G, YALI0C16995G, YALI0C16797G, YALI0B14619G, YALI0D15708G, YALI0D24431G	53	495	2705	0.927959	1	0.999907	100
GOTERM_MF_FAT	GO:0017076~purine nucleotide binding	9	8.41121	0.892941	YALI0E03212G, YALI0E12573G, YALI0F23749G, YALI0E13420G, YALI0C16995G, YALI0C16797G, YALI0B14619G, YALI0D15708G, YALI0D24431G	53	576	2705	0.797465	1	0.999992	100
GOTERM_MF_FAT	GO:0000166~nucleotide binding	11	10.2804	0.909417	YALI0E03212G, YALI0E12573G, YALI0F23749G, YALI0E13420G, YALI0C16995G, YALI0C16797G, YALI0B14619G, YALI0D12661G, YALI0D15708G, YALI0E18502G, YALI0D24431G	53	709	2705	0.791841	1	0.999994	100
Annotation Cluster 2	Enrichment Score: 2.5552559426046164
Category	Term	Count	%	PValue	Genes	List Total	Pop Hits	Pop Total	Fold Enrichment	Bonferroni	Benjamini	FDR
INTERPRO	IPR002155:Thiolase	3	2.80374	0.00156099	YALI0E11099G, YALI0D00176G, YALI0E18568G	82	4	4938	45.1646	0.24865	0.0689768	1.91106
PIR_SUPERFAMILY	PIRSF000429:Ac-CoA_Ac_transf	3	2.80374	0.0026139	YALI0E11099G, YALI0D00176G, YALI0E18568G	28	4	1253	33.5625	0.0730934	0.0730934	2.18568
INTERPRO	IPR016038:Thiolase-like, subgroup	3	2.80374	0.00529106	YALI0E11099G, YALI0D00176G, YALI0E18568G	82	7	4938	25.8084	0.621233	0.176479	6.34252
Annotation Cluster 3	Enrichment Score: 2.0662695242022906
Category	Term	Count	%	PValue	Genes	List Total	Pop Hits	Pop Total	Fold Enrichment	Bonferroni	Benjamini	FDR
KEGG_PATHWAY	yli00071:Fatty acid metabolism	6	5.60748	8.73329e-05	YALI0E11099G, YALI0E17787G, YALI0F23749G, YALI0A16379G, YALI0E18568G, YALI0B10406G	34	18	1167	11.4412	0.00296504	0.00148362	0.076775
KEGG_PATHWAY	yli00310:Lysine degradation	3	2.80374	0.0809499	YALI0E11099G, YALI0F23749G, YALI0B10406G	34	17	1167	6.05709	0.943307	0.30146	52.4005
KEGG_PATHWAY	yli00380:Tryptophan metabolism	3	2.80374	0.0894947	YALI0E11099G, YALI0F23749G, YALI0B10406G	34	18	1167	5.72059	0.958733	0.298257	56.1543
Downregulated
No significant clusters.

## Sheet: DD Normox-v-Wildtype Normox
Gene enrichment in upc2/sre1 cells compared to wildtype cells growing in normoxia
Upregulated genes
Category	Term	Count	%	PValue	Genes	List Total	Pop Hits	Pop Total	Fold Enrichment	Bonferroni	Benjamini	FDR
GOTERM_CC_FAT	GO:0031224~intrinsic to membrane	81	7.85645	1.02e-12	YALI0D08228G, YALI0F29491G, YALI0F06776G, YALI0B17930G, YALI0F25685G, YALI0A06787G, YALI0E20713G, YALI0D20262G, YALI0E25201G, YALI0B13134G, YALI0E34551G, YALI0D00132G, YALI0D09933G, YALI0F12089G, YALI0D08558G, YALI0C05753G, YALI0E28941G, YALI0F14795G, YALI0B01342G, YALI0F10098G, YALI0F01122G, YALI0B20966G, YALI0E07205G, YALI0D07986G, YALI0F13651G, YALI0E06721G, YALI0F06578G, YALI0F19866G, YALI0B2…	115	425	1090	1.80645	7.64e-11	7.64e-11	1.07e-09
GOTERM_CC_FAT	GO:0016021~integral to membrane	80	7.75946	2.33e-12	YALI0D08228G, YALI0F29491G, YALI0F06776G, YALI0B17930G, YALI0F25685G, YALI0A06787G, YALI0E20713G, YALI0D20262G, YALI0E25201G, YALI0B13134G, YALI0E34551G, YALI0D00132G, YALI0D09933G, YALI0F12089G, YALI0D08558G, YALI0C05753G, YALI0F14795G, YALI0B01342G, YALI0F10098G, YALI0F01122G, YALI0B20966G, YALI0E07205G, YALI0D07986G, YALI0F13651G, YALI0E06721G, YALI0F06578G, YALI0F19866G, YALI0B20746G, YALI0C0…	115	421	1090	1.80109	1.75e-10	8.73e-11	2.44e-09
SP_PIR_KEYWORDS	transmembrane	56	5.43162	0.0936481	YALI0D08228G, YALI0F29491G, YALI0B17930G, YALI0F06776G, YALI0A06787G, YALI0E20713G, YALI0B13134G, YALI0E34551G, YALI0D00132G, YALI0D09933G, YALI0D08558G, YALI0C05753G, YALI0B01342G, YALI0F01122G, YALI0E07205G, YALI0D07986G, YALI0E06721G, YALI0F06578G, YALI0F19866G, YALI0C03608G, YALI0F01166G, YALI0D08382G, YALI0F15609G, YALI0F02321G, YALI0A01023G, YALI0B19800G, YALI0E13442G, YALI0E24123G, YALI0C1…	1023	292	6434	1.20618	0.999996	0.873166	67.9764
SP_PIR_KEYWORDS	membrane	48	4.65567	0.464739	YALI0D08228G, YALI0B09273G, YALI0E19338G, YALI0F29491G, YALI0F06776G, YALI0B17930G, YALI0A06699G, YALI0A06787G, YALI0D18403G, YALI0D01045G, YALI0E21780G, YALI0B13134G, YALI0E34551G, YALI0D00132G, YALI0B21230G, YALI0D04873G, YALI0D09933G, YALI0C05753G, YALI0D08558G, YALI0F12397G, YALI0F13189G, YALI0E22506G, YALI0B01342G, YALI0F03432G, YALI0C22187G, YALI0F01122G, YALI0F08349G, YALI0F07040G, YALI0E0…	1023	290	6434	1.041	1	0.980503	99.9281
Annotation Cluster 2	Enrichment Score: 3.969765848875489
Category	Term	Count	%	PValue	Genes	List Total	Pop Hits	Pop Total	Fold Enrichment	Bonferroni	Benjamini	FDR
GOTERM_MF_FAT	GO:0004180~carboxypeptidase activity	9	0.872939	1.32e-05	YALI0B13310G, YALI0D08052G, YALI0B20812G, YALI0B01408G, YALI0C21604G, YALI0F11803G, YALI0D09042G, YALI0A18810G, YALI0C00803G	372	11	2705	5.94941	0.00420477	0.00420477	0.0178147
GOTERM_MF_FAT	GO:0017171~serine hydrolase activity	16	1.55189	6.62e-05	YALI0F23595G, YALI0B02838G, YALI0A08360G, YALI0B20812G, YALI0F12353G, YALI0F11077G, YALI0B16500G, YALI0C21604G, YALI0D08052G, YALI0F13189G, YALI0B01408G, YALI0F11803G, YALI0D09042G, YALI0C20691G, YALI0A18810G, YALI0C00803G	372	38	2705	3.06169	0.0209085	0.00701866	0.0893038
GOTERM_MF_FAT	GO:0008236~serine-type peptidase activity	16	1.55189	6.62e-05	YALI0F23595G, YALI0B02838G, YALI0A08360G, YALI0B20812G, YALI0F12353G, YALI0F11077G, YALI0B16500G, YALI0C21604G, YALI0D08052G, YALI0F13189G, YALI0B01408G, YALI0F11803G, YALI0D09042G, YALI0C20691G, YALI0A18810G, YALI0C00803G	372	38	2705	3.06169	0.0209085	0.00701866	0.0893038
GOTERM_MF_FAT	GO:0070008~serine-type exopeptidase activity	8	0.775946	7.16e-05	YALI0D08052G, YALI0B20812G, YALI0B01408G, YALI0C21604G, YALI0F11803G, YALI0D09042G, YALI0A18810G, YALI0C00803G	372	10	2705	5.8172	0.0225828	0.00569416	0.0965338
GOTERM_MF_FAT	GO:0004185~serine-type carboxypeptidase activity	8	0.775946	7.16e-05	YALI0D08052G, YALI0B20812G, YALI0B01408G, YALI0C21604G, YALI0F11803G, YALI0D09042G, YALI0A18810G, YALI0C00803G	372	10	2705	5.8172	0.0225828	0.00569416	0.0965338
INTERPRO	IPR001563:Peptidase S10, serine carboxypeptidase	8	0.775946	0.000135	YALI0D08052G, YALI0B20812G, YALI0B01408G, YALI0C21604G, YALI0F11803G, YALI0D09042G, YALI0A18810G, YALI0C00803G	744	10	4938	5.30968	0.104587	0.104587	0.207032
INTERPRO	IPR018202:Peptidase S10, serine carboxypeptidase, active site	8	0.775946	0.000135	YALI0D08052G, YALI0B20812G, YALI0B01408G, YALI0C21604G, YALI0F11803G, YALI0D09042G, YALI0A18810G, YALI0C00803G	744	10	4938	5.30968	0.104587	0.104587	0.207032
GOTERM_MF_FAT	GO:0008238~exopeptidase activity	9	0.872939	0.00324503	YALI0B13310G, YALI0D08052G, YALI0B20812G, YALI0B01408G, YALI0C21604G, YALI0F11803G, YALI0D09042G, YALI0A18810G, YALI0C00803G	372	20	2705	3.27218	0.645429	0.0984905	4.28933
Annotation Cluster 3	Enrichment Score: 3.5159114132252602
Category	Term	Count	%	PValue	Genes	List Total	Pop Hits	Pop Total	Fold Enrichment	Bonferroni	Benjamini	FDR
GOTERM_MF_FAT	GO:0008233~peptidase activity	44	4.2677	4.7e-05	YALI0F07733G, YALI0B02838G, YALI0B20812G, YALI0D22957G, YALI0F16489G, YALI0C21604G, YALI0C01133G, YALI0B16500G, YALI0D10835G, YALI0F27071G, YALI0E05423G, YALI0D08052G, YALI0E17831G, YALI0F13189G, YALI0F01903G, YALI0A02607G, YALI0E22374G, YALI0E10175G, YALI0C20691G, YALI0F09163G, YALI0E24981G, YALI0C00803G, YALI0F23595G, YALI0A08360G, YALI0B05258G, YALI0F07667G, YALI0D10967G, YALI0A13277G, YALI0F1…	372	175	2705	1.82826	0.0148803	0.00746806	0.0633705
GOTERM_BP_FAT	GO:0006508~proteolysis	47	4.55868	9.25e-05	YALI0F07733G, YALI0B02838G, YALI0D15444G, YALI0B20812G, YALI0D22957G, YALI0F16489G, YALI0C21604G, YALI0C01133G, YALI0B16500G, YALI0D10835G, YALI0F27071G, YALI0E05423G, YALI0E17831G, YALI0D08052G, YALI0F13189G, YALI0F01903G, YALI0A02607G, YALI0E22374G, YALI0E10175G, YALI0F15697G, YALI0C20691G, YALI0F09163G, YALI0E24981G, YALI0C00803G, YALI0F23595G, YALI0B01166G, YALI0A08360G, YALI0B05258G, YALI0F0…	292	216	2326	1.73329	0.0338354	0.0170633	0.127616
GOTERM_MF_FAT	GO:0070011~peptidase activity, acting on L-amino acid peptides	41	3.97672	0.000122	YALI0F07733G, YALI0B02838G, YALI0B20812G, YALI0D22957G, YALI0F16489G, YALI0C21604G, YALI0B16500G, YALI0D10835G, YALI0F27071G, YALI0E05423G, YALI0F13189G, YALI0D08052G, YALI0E17831G, YALI0F01903G, YALI0A02607G, YALI0E22374G, YALI0E10175G, YALI0C20691G, YALI0F09163G, YALI0E24981G, YALI0C00803G, YALI0F23595G, YALI0A08360G, YALI0F07667G, YALI0D10967G, YALI0A13277G, YALI0F12353G, YALI0F11077G, YALI0F0…	372	165	2705	1.80686	0.0380854	0.00773584	0.164046
GOTERM_MF_FAT	GO:0004175~endopeptidase activity	25	2.42483	0.0163186	YALI0F07733G, YALI0D22957G, YALI0B16500G, YALI0D10835G, YALI0F27071G, YALI0E05423G, YALI0F13189G, YALI0E17831G, YALI0E22374G, YALI0E10175G, YALI0C20691G, YALI0E24981G, YALI0F09163G, YALI0F23595G, YALI0A08360G, YALI0D10967G, YALI0F07667G, YALI0F12353G, YALI0F11077G, YALI0F05940G, YALI0E33363G, YALI0F10549G, YALI0A13013G, YALI0B05654G, YALI0F25091G	372	113	2705	1.60874	0.994745	0.252924	19.9023
Annotation Cluster 4	Enrichment Score: 2.861895440868527
Category	Term	Count	%	PValue	Genes	List Total	Pop Hits	Pop Total	Fold Enrichment	Bonferroni	Benjamini	FDR
UP_SEQ_FEATURE	signal peptide	11	1.06693	3.91e-05	YALI0E32703G, YALI0F13189G, YALI0F05390G, YALI0B05654G, YALI0D26906G, YALI0E23155G, YALI0A04895G, YALI0C22187G, YALI0D03465G, YALI0B03652G, YALI0C23991G	52	28	589	4.44986	0.00549422	0.00549422	0.0461497
UP_SEQ_FEATURE	glycosylation site:N-linked (GlcNAc...)	10	0.969932	0.000354	YALI0D08558G, YALI0F13189G, YALI0C03608G, YALI0B05654G, YALI0E23155G, YALI0F06358G, YALI0D03465G, YALI0B03652G, YALI0C23991G, YALI0B16236G	52	29	589	3.90584	0.0487305	0.0246695	0.417699
SP_PIR_KEYWORDS	signal	11	1.06693	0.00830505	YALI0E32703G, YALI0F13189G, YALI0F05390G, YALI0B05654G, YALI0D26906G, YALI0E23155G, YALI0A04895G, YALI0C22187G, YALI0D03465G, YALI0B03652G, YALI0C23991G	1023	28	6434	2.47081	0.650344	0.650344	9.20623
SP_PIR_KEYWORDS	glycoprotein	10	0.969932	0.031038	YALI0D08558G, YALI0F13189G, YALI0C03608G, YALI0B05654G, YALI0E23155G, YALI0F06358G, YALI0D03465G, YALI0B03652G, YALI0C23991G, YALI0B16236G	1023	29	6434	2.16874	0.981179	0.629608	30.5899
Annotation Cluster 5	Enrichment Score: 1.8621569685481039
Category	Term	Count	%	PValue	Genes	List Total	Pop Hits	Pop Total	Fold Enrichment	Bonferroni	Benjamini	FDR
GOTERM_MF_FAT	GO:0004559~alpha-mannosidase activity	5	0.484966	0.00416041	YALI0D21890G, YALI0B13530G, YALI0A20438G, YALI0D02563G, YALI0F18722G	372	6	2705	6.05959	0.735507	0.113881	5.46812
INTERPRO	IPR005198:Glycoside hydrolase, family 76	5	0.484966	0.00592004	YALI0B13530G, YALI0A19888G, YALI0A20438G, YALI0D02563G, YALI0F18722G	744	6	4938	5.53091	0.992363	0.556237	8.73958
GOTERM_MF_FAT	GO:0015923~mannosidase activity	6	0.581959	0.00659005	YALI0D12925G, YALI0D21890G, YALI0B13530G, YALI0A20438G, YALI0D02563G, YALI0F18722G	372	10	2705	4.3629	0.878663	0.149767	8.53204
PIR_SUPERFAMILY	PIRSF016302:Man_a_manosd	4	0.387973	0.0168156	YALI0B13530G, YALI0A20438G, YALI0D02563G, YALI0F18722G	161	5	1253	6.22609	0.930226	0.930226	18.4627
GOTERM_MF_FAT	GO:0008496~mannan endo-1,6-alpha-mannosidase activity	4	0.387973	0.0206706	YALI0B13530G, YALI0A20438G, YALI0D02563G, YALI0F18722G	372	5	2705	5.8172	0.998723	0.295795	24.5522
INTERPRO	IPR014480:Mannan endo-1,6-alpha-mannosidase	4	0.387973	0.0267702	YALI0B13530G, YALI0A20438G, YALI0D02563G, YALI0F18722G	744	5	4938	5.30968	1	0.709938	34.1599
GOTERM_BP_FAT	GO:0016052~carbohydrate catabolic process	8	0.775946	0.0610711	YALI0F07711G, YALI0F02607G, YALI0B13530G, YALI0F04532G, YALI0A20438G, YALI0D02563G, YALI0F18722G, YALI0E20207G	292	29	2326	2.19745	1	0.85822	58.0905
Annotation Cluster 6	Enrichment Score: 1.7887386462544825
Category	Term	Count	%	PValue	Genes	List Total	Pop Hits	Pop Total	Fold Enrichment	Bonferroni	Benjamini	FDR
INTERPRO	IPR013087:Zinc finger, C2H2-type/integrase, DNA-binding	8	0.775946	0.0118679	YALI0A16841G, YALI0C13750G, YALI0F03157G, YALI0B21582G, YALI0B05478G, YALI0E31845G, YALI0C12364G, YALI0B00660G	744	18	4938	2.94982	0.999945	0.624758	16.797
SMART	SM00355:ZnF_C2H2	15	1.4549	0.0126594	YALI0F11487G, YALI0F03157G, YALI0C20713G, YALI0B11902G, YALI0D05041G, YALI0C12364G, YALI0E31845G, YALI0E24937G, YALI0B00660G, YALI0A16841G, YALI0C13750G, YALI0B21582G, YALI0B05478G, YALI0F19822G, YALI0E04532G	214	54	1528	1.98339	0.788664	0.788664	13.6436
INTERPRO	IPR007087:Zinc finger, C2H2-type	14	1.3579	0.0182731	YALI0F11487G, YALI0F03157G, YALI0B11902G, YALI0D05041G, YALI0C12364G, YALI0E31845G, YALI0E24937G, YALI0B00660G, YALI0A16841G, YALI0C13750G, YALI0B05478G, YALI0B21582G, YALI0F19822G, YALI0E04532G	744	47	4938	1.97701	1	0.687981	24.7272
INTERPRO	IPR015880:Zinc finger, C2H2-like	15	1.4549	0.0254944	YALI0F11487G, YALI0F03157G, YALI0C20713G, YALI0B11902G, YALI0D05041G, YALI0C12364G, YALI0E31845G, YALI0E24937G, YALI0B00660G, YALI0A16841G, YALI0C13750G, YALI0B21582G, YALI0B05478G, YALI0F19822G, YALI0E04532G	744	54	4938	1.84364	1	0.71269	32.8179
Annotation Cluster 7	Enrichment Score: 1.7373219738690464
Category	Term	Count	%	PValue	Genes	List Total	Pop Hits	Pop Total	Fold Enrichment	Bonferroni	Benjamini	FDR
GOTERM_MF_FAT	GO:0043167~ion binding	110	10.6693	0.00184937	YALI0D12925G, YALI0B13134G, YALI0E28809G, YALI0D02475G, YALI0D04246G, YALI0B13838G, YALI0C13750G, YALI0E22198G, YALI0E05599G, YALI0E04114G, YALI0C10010G, YALI0D06193G, YALI0D05041G, YALI0D04851G, YALI0F15037G, YALI0F01232G, YALI0C06171G, YALI0F29623G, YALI0F02981G, YALI0F12683G, YALI0A20273G, YALI0A18271G, YALI0E18634G, YALI0E21780G, YALI0F12749G, YALI0E11737G, YALI0F05390G, YALI0F20834G, YALI0D2…	372	628	2705	1.27367	0.445947	0.0711535	2.46584
GOTERM_MF_FAT	GO:0043169~cation binding	110	10.6693	0.00184937	YALI0D12925G, YALI0B13134G, YALI0E28809G, YALI0D02475G, YALI0D04246G, YALI0B13838G, YALI0C13750G, YALI0E22198G, YALI0E05599G, YALI0E04114G, YALI0C10010G, YALI0D06193G, YALI0D05041G, YALI0D04851G, YALI0F15037G, YALI0F01232G, YALI0C06171G, YALI0F29623G, YALI0F02981G, YALI0F12683G, YALI0A20273G, YALI0A18271G, YALI0E18634G, YALI0E21780G, YALI0F12749G, YALI0E11737G, YALI0F05390G, YALI0F20834G, YALI0D2…	372	628	2705	1.27367	0.445947	0.0711535	2.46584
GOTERM_MF_FAT	GO:0046872~metal ion binding	105	10.1843	0.00635507	YALI0D12925G, YALI0B13134G, YALI0E28809G, YALI0D02475G, YALI0D04246G, YALI0C13750G, YALI0B13838G, YALI0E22198G, YALI0E05599G, YALI0E04114G, YALI0C10010G, YALI0D06193G, YALI0D05041G, YALI0F15037G, YALI0F01232G, YALI0C06171G, YALI0F29623G, YALI0F02981G, YALI0F12683G, YALI0A18271G, YALI0A20273G, YALI0E18634G, YALI0E21780G, YALI0E11737G, YALI0F12749G, YALI0F20834G, YALI0D20482G, YALI0F22561G, YALI0F1…	372	616	2705	1.23946	0.869154	0.155895	8.23978
GOTERM_MF_FAT	GO:0008270~zinc ion binding	63	6.11057	0.0364965	YALI0B08206G, YALI0E12463G, YALI0E24937G, YALI0F16599G, YALI0D15510G, YALI0E28809G, YALI0D02475G, YALI0E07810G, YALI0C13750G, YALI0E16577G, YALI0E04114G, YALI0C10010G, YALI0F11487G, YALI0F07975G, YALI0F07667G, YALI0D06193G, YALI0F03157G, YALI0C20713G, YALI0D05041G, YALI0B11902G, YALI0E31339G, YALI0F15037G, YALI0F13321G, YALI0A16841G, YALI0F01232G, YALI0C06171G, YALI0F29623G, YALI0D02167G, YALI0A1…	372	367	2705	1.24824	0.999993	0.389925	39.4364
GOTERM_MF_FAT	GO:0046914~transition metal ion binding	83	8.05044	0.0626195	YALI0E04488G, YALI0B08206G, YALI0E12463G, YALI0B13134G, YALI0F16599G, YALI0E24937G, YALI0D15510G, YALI0E28809G, YALI0D02475G, YALI0C18315G, YALI0D09933G, YALI0D04246G, YALI0E07810G, YALI0B13838G, YALI0C13750G, YALI0B01848G, YALI0E22198G, YALI0E16577G, YALI0E04114G, YALI0F01320G, YALI0C10010G, YALI0F11487G, YALI0B19998G, YALI0F07975G, YALI0F07667G, YALI0D06193G, YALI0F03157G, YALI0C20713G, YALI0C1…	372	515	2705	1.17191	1	0.475148	58.1978
SP_PIR_KEYWORDS	metal-binding	39	3.78274	0.758475	YALI0A20273G, YALI0E18634G, YALI0B08206G, YALI0D09735G, YALI0B21846G, YALI0E21780G, YALI0E12463G, YALI0F16599G, YALI0D15510G, YALI0E28809G, YALI0F24915G, YALI0C18315G, YALI0D09933G, YALI0F12749G, YALI0E11737G, YALI0B13838G, YALI0B01848G, YALI0E14509G, YALI0A19514G, YALI0E04114G, YALI0F20834G, YALI0D20482G, YALI0F22561G, YALI0F01320G, YALI0C19151G, YALI0E23474G, YALI0F17468G, YALI0F09746G, YALI0A0…	1023	262	6434	0.9362	1	0.996895	100
Annotation Cluster 8	Enrichment Score: 1.6511492842225513
Category	Term	Count	%	PValue	Genes	List Total	Pop Hits	Pop Total	Fold Enrichment	Bonferroni	Benjamini	FDR
GOTERM_CC_FAT	GO:0005576~extracellular region	7	0.678952	0.000171	YALI0F05390G, YALI0B05654G, YALI0D08140G, YALI0D06149G, YALI0F17490G, YALI0D03465G, YALI0C23991G	115	10	1090	6.63478	0.0127212	0.00425849	0.178994
SP_PIR_KEYWORDS	Secreted	4	0.387973	0.0140913	YALI0F05390G, YALI0B05654G, YALI0D03465G, YALI0C23991G	1023	4	6434	6.28935	0.832728	0.591011	15.1553
UP_SEQ_FEATURE	disulfide bond	3	0.29098	0.211778	YALI0F05390G, YALI0B05654G, YALI0C23991G	52	10	589	3.39808	1	0.975966	93.9878
SP_PIR_KEYWORDS	disulfide bond	3	0.29098	0.487938	YALI0F05390G, YALI0B05654G, YALI0C23991G	1023	10	6434	1.8868	1	0.978362	99.957
Annotation Cluster 9	Enrichment Score: 1.604981152985896
Category	Term	Count	%	PValue	Genes	List Total	Pop Hits	Pop Total	Fold Enrichment	Bonferroni	Benjamini	FDR
UP_SEQ_FEATURE	topological domain:Cytoplasmic	10	0.969932	0.00131702	YALI0F07491G, YALI0F12397G, YALI0F01166G, YALI0F06358G, YALI0E33627G, YALI0E21780G, YALI0C22187G, YALI0F08349G, YALI0B03652G, YALI0B16236G	52	34	589	3.33145	0.169579	0.0600615	1.54486
UP_SEQ_FEATURE	transmembrane region	17	1.64888	0.00903611	YALI0E09471G, YALI0F29491G, YALI0A06787G, YALI0E33627G, YALI0E06721G, YALI0E21780G, YALI0F07491G, YALI0D08558G, YALI0F12397G, YALI0F13189G, YALI0C03608G, YALI0F01166G, YALI0F06358G, YALI0C22187G, YALI0F08349G, YALI0B03652G, YALI0B16236G	52	104	589	1.85152	0.72193	0.27383	10.1686
UP_SEQ_FEATURE	topological domain:Lumenal	6	0.581959	0.0404376	YALI0F01166G, YALI0F06358G, YALI0E21780G, YALI0C22187G, YALI0F08349G, YALI0B03652G	52	23	589	2.95485	0.997033	0.564585	38.593
SP_PIR_KEYWORDS	endoplasmic reticulum	9	0.872939	0.79016	YALI0E32703G, YALI0D08558G, YALI0F01166G, YALI0A06787G, YALI0E23155G, YALI0F06358G, YALI0E06721G, YALI0C22187G, YALI0B03652G	1023	62	6434	0.912969	1	0.997425	100
Annotation Cluster 10	Enrichment Score: 1.4870272473226145
Category	Term	Count	%	PValue	Genes	List Total	Pop Hits	Pop Total	Fold Enrichment	Bonferroni	Benjamini	FDR
GOTERM_MF_FAT	GO:0005509~calcium ion binding	12	1.16392	0.00095	YALI0F07491G, YALI0D12925G, YALI0E09471G, YALI0F13189G, YALI0F20020G, YALI0D08338G, YALI0E05599G, YALI0B17622G, YALI0E29689G, YALI0F07601G, YALI0F12683G, YALI0F02145G	372	29	2705	3.0089	0.261483	0.0423775	1.27345
SP_PIR_KEYWORDS	calcium	7	0.678952	0.0150847	YALI0F07491G, YALI0E09471G, YALI0F13189G, YALI0F20020G, YALI0D08338G, YALI0E05599G, YALI0F12683G	1023	14	6434	3.14467	0.852681	0.471855	16.14
INTERPRO	IPR018249:EF-HAND 2	7	0.678952	0.0421588	YALI0F07491G, YALI0F20020G, YALI0E05599G, YALI0B17622G, YALI0F07601G, YALI0F12683G, YALI0F02145G	744	18	4938	2.58109	1	0.829353	48.4917
INTERPRO	IPR018247:EF-HAND 1	8	0.775946	0.196267	YALI0F07491G, YALI0F20020G, YALI0F12573G, YALI0E05599G, YALI0D13552G, YALI0F12683G, YALI0F02145G, YALI0E20207G	744	32	4938	1.65927	1	0.977997	96.5446
INTERPRO	IPR018248:EF hand	4	0.387973	0.309731	YALI0F20020G, YALI0E05599G, YALI0F12683G, YALI0F02145G	744	13	4938	2.04218	1	0.995636	99.6685
Annotation Cluster 11	Enrichment Score: 1.3379500850562007
Category	Term	Count	%	PValue	Genes	List Total	Pop Hits	Pop Total	Fold Enrichment	Bonferroni	Benjamini	FDR
GOTERM_MF_FAT	GO:0004175~endopeptidase activity	25	2.42483	0.0163186	YALI0F07733G, YALI0D22957G, YALI0B16500G, YALI0D10835G, YALI0F27071G, YALI0E05423G, YALI0F13189G, YALI0E17831G, YALI0E22374G, YALI0E10175G, YALI0C20691G, YALI0E24981G, YALI0F09163G, YALI0F23595G, YALI0A08360G, YALI0D10967G, YALI0F07667G, YALI0F12353G, YALI0F11077G, YALI0F05940G, YALI0E33363G, YALI0F10549G, YALI0A13013G, YALI0B05654G, YALI0F25091G	372	113	2705	1.60874	0.994745	0.252924	19.9023
PIR_SUPERFAMILY	PIRSF001187:Pepsin	4	0.387973	0.0168156	YALI0B05654G, YALI0D10967G, YALI0F27071G, YALI0E33363G	161	5	1253	6.22609	0.930226	0.930226	18.4627
INTERPRO	IPR009007:Peptidase aspartic, catalytic	12	1.16392	0.0206787	YALI0F10549G, YALI0B05654G, YALI0D10967G, YALI0A13013G, YALI0E22374G, YALI0E10175G, YALI0D22957G, YALI0D10835G, YALI0F09163G, YALI0E24981G, YALI0F27071G, YALI0E33363G	744	38	4938	2.09593	1	0.706352	27.5185
INTERPRO	IPR001461:Peptidase A1	12	1.16392	0.0206787	YALI0F10549G, YALI0B05654G, YALI0D10967G, YALI0A13013G, YALI0E22374G, YALI0E10175G, YALI0D22957G, YALI0D10835G, YALI0F09163G, YALI0E24981G, YALI0F27071G, YALI0E33363G	744	38	4938	2.09593	1	0.706352	27.5185
GOTERM_MF_FAT	GO:0070001~aspartic-type peptidase activity	12	1.16392	0.0900855	YALI0F10549G, YALI0B05654G, YALI0D10967G, YALI0A13013G, YALI0E22374G, YALI0E10175G, YALI0D22957G, YALI0D10835G, YALI0F09163G, YALI0E24981G, YALI0F27071G, YALI0E33363G	372	52	2705	1.67804	1	0.556883	72.0104
GOTERM_MF_FAT	GO:0004190~aspartic-type endopeptidase activity	12	1.16392	0.0900855	YALI0F10549G, YALI0B05654G, YALI0D10967G, YALI0A13013G, YALI0E22374G, YALI0E10175G, YALI0D22957G, YALI0D10835G, YALI0F09163G, YALI0E24981G, YALI0F27071G, YALI0E33363G	372	52	2705	1.67804	1	0.556883	72.0104
INTERPRO	IPR001969:Peptidase aspartic, active site	10	0.969932	0.106452	YALI0F10549G, YALI0B05654G, YALI0D10967G, YALI0E22374G, YALI0E10175G, YALI0D22957G, YALI0D10835G, YALI0F09163G, YALI0F27071G, YALI0E33363G	744	38	4938	1.7466	1	0.928655	82.3354
SP_PIR_KEYWORDS	Aspartyl protease	7	0.678952	0.195206	YALI0F10549G, YALI0B05654G, YALI0E22374G, YALI0E10175G, YALI0D10835G, YALI0F27071G, YALI0E33363G	1023	25	6434	1.76102	1	0.916888	91.9133
Annotation Cluster 12	Enrichment Score: 1.3231584081752525
Category	Term	Count	%	PValue	Genes	List Total	Pop Hits	Pop Total	Fold Enrichment	Bonferroni	Benjamini	FDR
GOTERM_BP_FAT	GO:0006468~protein amino acid phosphorylation	21	2.03686	0.00353002	YALI0F00572G, YALI0E27632G, YALI0F11385G, YALI0D25388G, YALI0F08165G, YALI0F01716G, YALI0C00891G, YALI0D26213G, YALI0F16159G, YALI0F09746G, YALI0F27159G, YALI0F03113G, YALI0F08855G, YALI0C04587G, YALI0F13629G, YALI0F14707G, YALI0F07557G, YALI0F08789G, YALI0B08558G, YALI0E19679G, YALI0B17556G	292	86	2326	1.94513	0.731657	0.354995	4.76312
GOTERM_MF_FAT	GO:0004672~protein kinase activity	21	2.03686	0.0150307	YALI0F00572G, YALI0E27632G, YALI0F11385G, YALI0D25388G, YALI0F08165G, YALI0F01716G, YALI0C00891G, YALI0D26213G, YALI0F16159G, YALI0F09746G, YALI0F27159G, YALI0F03113G, YALI0F08855G, YALI0C04587G, YALI0F13629G, YALI0F14707G, YALI0F07557G, YALI0F08789G, YALI0B08558G, YALI0E19679G, YALI0B17556G	372	89	2705	1.71575	0.992023	0.247374	18.4761
GOTERM_MF_FAT	GO:0004674~protein serine/threonine kinase activity	19	1.84287	0.0228878	YALI0F00572G, YALI0E27632G, YALI0F11385G, YALI0F08165G, YALI0D25388G, YALI0F01716G, YALI0C00891G, YALI0D26213G, YALI0F16159G, YALI0F09746G, YALI0F27159G, YALI0F03113G, YALI0F08855G, YALI0C04587G, YALI0F13629G, YALI0F14707G, YALI0F07557G, YALI0B08558G, YALI0B17556G	372	81	2705	1.70566	0.99938	0.308784	26.8239
INTERPRO	IPR008271:Serine/threonine protein kinase, active site	19	1.84287	0.0233393	YALI0F00572G, YALI0E27632G, YALI0F11385G, YALI0F08165G, YALI0D25388G, YALI0F01716G, YALI0C00891G, YALI0D26213G, YALI0F16159G, YALI0F09746G, YALI0F27159G, YALI0F03113G, YALI0F08855G, YALI0C04587G, YALI0F13629G, YALI0F14707G, YALI0F07557G, YALI0B08558G, YALI0B17556G	744	74	4938	1.70412	1	0.725439	30.4928
SMART	SM00220:S_TKc	13	1.26091	0.0481453	YALI0F00572G, YALI0E27632G, YALI0F08165G, YALI0D25388G, YALI0C00891G, YALI0D26213G, YALI0F09746G, YALI0F03113G, YALI0C04587G, YALI0F14707G, YALI0F13629G, YALI0F07557G, YALI0B17556G	214	52	1528	1.78505	0.99757	0.865556	43.3409
INTERPRO	IPR017442:Serine/threonine protein kinase-related	18	1.74588	0.0623101	YALI0F00572G, YALI0E27632G, YALI0F11385G, YALI0F08165G, YALI0D25388G, YALI0F01716G, YALI0C00891G, YALI0D26213G, YALI0F16159G, YALI0F09746G, YALI0F27159G, YALI0F03113G, YALI0C04587G, YALI0F13629G, YALI0F14707G, YALI0F07557G, YALI0B08558G, YALI0B17556G	744	77	4938	1.55153	1	0.868866	62.8766
GOTERM_BP_FAT	GO:0006793~phosphorus metabolic process	27	2.61882	0.0706801	YALI0F11385G, YALI0E27632G, YALI0F01716G, YALI0C00891G, YALI0F09559G, YALI0D26213G, YALI0F16159G, YALI0F00858G, YALI0F27159G, YALI0F24585G, YALI0F08855G, YALI0F07557G, YALI0B08558G, YALI0B17556G, YALI0C06460G, YALI0F00572G, YALI0F08165G, YALI0D25388G, YALI0F09746G, YALI0F03113G, YALI0C11033G, YALI0C04587G, YALI0F13629G, YALI0F14707G, YALI0F08789G, YALI0B04290G, YALI0E19679G	292	156	2326	1.37869	1	0.857405	63.6371
GOTERM_BP_FAT	GO:0006796~phosphate metabolic process	27	2.61882	0.0706801	YALI0F11385G, YALI0E27632G, YALI0F01716G, YALI0C00891G, YALI0F09559G, YALI0D26213G, YALI0F16159G, YALI0F00858G, YALI0F27159G, YALI0F24585G, YALI0F08855G, YALI0F07557G, YALI0B08558G, YALI0B17556G, YALI0C06460G, YALI0F00572G, YALI0F08165G, YALI0D25388G, YALI0F09746G, YALI0F03113G, YALI0C11033G, YALI0C04587G, YALI0F13629G, YALI0F14707G, YALI0F08789G, YALI0B04290G, YALI0E19679G	292	156	2326	1.37869	1	0.857405	63.6371
INTERPRO	IPR000719:Protein kinase, core	18	1.74588	0.0762196	YALI0F00572G, YALI0E27632G, YALI0F11385G, YALI0F08165G, YALI0D25388G, YALI0F01716G, YALI0C00891G, YALI0D26213G, YALI0F16159G, YALI0F09746G, YALI0F27159G, YALI0F03113G, YALI0C04587G, YALI0F13629G, YALI0F14707G, YALI0F07557G, YALI0B08558G, YALI0B17556G	744	79	4938	1.51225	1	0.894016	70.5096
INTERPRO	IPR002290:Serine/threonine protein kinase	13	1.26091	0.0810673	YALI0F00572G, YALI0E27632G, YALI0F08165G, YALI0D25388G, YALI0C00891G, YALI0D26213G, YALI0F09746G, YALI0F03113G, YALI0C04587G, YALI0F14707G, YALI0F13629G, YALI0F07557G, YALI0B17556G	744	52	4938	1.65927	1	0.9011	72.8052
SP_PIR_KEYWORDS	serine/threonine-protein kinase	15	1.4549	0.127617	YALI0F00572G, YALI0E27632G, YALI0F08165G, YALI0D25388G, YALI0C00891G, YALI0D26213G, YALI0F16159G, YALI0F09746G, YALI0F03113G, YALI0F08855G, YALI0C04587G, YALI0F13629G, YALI0F07557G, YALI0B08558G, YALI0B17556G	1023	64	6434	1.47407	1	0.883551	79.4246
INTERPRO	IPR017441:Protein kinase, ATP binding site	15	1.4549	0.133437	YALI0F00572G, YALI0E27632G, YALI0F08165G, YALI0D25388G, YALI0C00891G, YALI0D26213G, YALI0F16159G, YALI0F09746G, YALI0F03113G, YALI0F08855G, YALI0C04587G, YALI0F13629G, YALI0F07557G, YALI0B08558G, YALI0B17556G	744	68	4938	1.46407	1	0.947113	88.9851
GOTERM_BP_FAT	GO:0016310~phosphorylation	22	2.13385	0.140828	YALI0F00572G, YALI0E27632G, YALI0F11385G, YALI0D25388G, YALI0F08165G, YALI0F01716G, YALI0C00891G, YALI0D26213G, YALI0F09559G, YALI0F16159G, YALI0F09746G, YALI0F27159G, YALI0F03113G, YALI0F08855G, YALI0C04587G, YALI0F13629G, YALI0F14707G, YALI0F07557G, YALI0F08789G, YALI0B08558G, YALI0E19679G, YALI0B17556G	292	132	2326	1.32763	1	0.940586	87.6899
Downregulated
Category	Term	Count	%	PValue	Genes	List Total	Pop Hits	Pop Total	Fold Enrichment	Bonferroni	Benjamini	FDR
GOTERM_MF_FAT	GO:0003735~structural constituent of ribosome	81	15.458	1.05691e-50	YALI0D24387G, YALI0D21626G, YALI0E23562G, YALI0D05753G, YALI0C21109G, YALI0B21076G, YALI0E00550G, YALI0E34826G, YALI0B20504G, YALI0F05522G, YALI0C07887G, YALI0B12848G, YALI0E25025G, YALI0F25531G, YALI0B11308G, YALI0E20493G, YALI0E29073G, YALI0A10725G, YALI0B08866G, YALI0F24739G, YALI0E21219G, YALI0E14124G, YALI0E27830G, YALI0C06820G, YALI0B12804G, YALI0B22594G, YALI0D10263G, YALI0B05896G, YALI0F1…	301	121	2705	6.0159	2.70568e-48	2.70568e-48	1.37814e-47
GOTERM_CC_FAT	GO:0005840~ribosome	83	15.8397	7.54724e-45	YALI0D24387G, YALI0D21626G, YALI0E23562G, YALI0D05753G, YALI0C21109G, YALI0B21076G, YALI0E00550G, YALI0E34826G, YALI0B20504G, YALI0F05522G, YALI0C07887G, YALI0B12848G, YALI0E25025G, YALI0F25531G, YALI0B11308G, YALI0E20493G, YALI0E29073G, YALI0A10725G, YALI0B08866G, YALI0F24739G, YALI0E21219G, YALI0E14124G, YALI0E27830G, YALI0C06820G, YALI0B12804G, YALI0D10263G, YALI0B22594G, YALI0B05896G, YALI0F1…	167	125	1090	4.33389	7.47177e-43	7.47177e-43	8.36109e-42
GOTERM_MF_FAT	GO:0005198~structural molecule activity	81	15.458	1.29546e-44	YALI0D24387G, YALI0D21626G, YALI0E23562G, YALI0D05753G, YALI0C21109G, YALI0B21076G, YALI0E00550G, YALI0E34826G, YALI0B20504G, YALI0F05522G, YALI0C07887G, YALI0B12848G, YALI0E25025G, YALI0F25531G, YALI0B11308G, YALI0E20493G, YALI0E29073G, YALI0A10725G, YALI0B08866G, YALI0F24739G, YALI0E21219G, YALI0E14124G, YALI0E27830G, YALI0C06820G, YALI0B12804G, YALI0B22594G, YALI0D10263G, YALI0B05896G, YALI0F1…	301	137	2705	5.31331	3.31639e-42	1.65819e-42	1.68921e-41
GOTERM_BP_FAT	GO:0006412~translation	98	18.7023	1.91393e-42	YALI0D21626G, YALI0E23562G, YALI0D22572G, YALI0E04246G, YALI0C21109G, YALI0B21076G, YALI0E00550G, YALI0F05522G, YALI0C07887G, YALI0A01760G, YALI0E25025G, YALI0B11308G, YALI0E20493G, YALI0B08866G, YALI0B12804G, YALI0B22594G, YALI0B05896G, YALI0E01452G, YALI0A20746G, YALI0D13882G, YALI0E32208G, YALI0E31911G, YALI0D16643G, YALI0B15103G, YALI0D13728G, YALI0E22352G, YALI0F25399G, YALI0E19701G, YALI0B0…	274	204	2326	4.07807	7.3112e-40	7.3112e-40	2.65166e-39
KEGG_PATHWAY	yli03010:Ribosome	63	12.0229	7.93956e-40	YALI0D24387G, YALI0E23562G, YALI0B21076G, YALI0E00550G, YALI0B20504G, YALI0F05522G, YALI0B12848G, YALI0C11473G, YALI0F25531G, YALI0E25025G, YALI0B11308G, YALI0E29073G, YALI0A10725G, YALI0B08866G, YALI0F24739G, YALI0E21219G, YALI0E27830G, YALI0C06820G, YALI0B12804G, YALI0D10263G, YALI0B05896G, YALI0F11055G, YALI0E13618G, YALI0E01452G, YALI0A20746G, YALI0D13882G, YALI0E31911G, YALI0B04224G, YALI0F0…	179	79	1167	5.19914	4.04918e-38	4.04918e-38	7.6807e-37
GOTERM_CC_FAT	GO:0030529~ribonucleoprotein complex	93	17.7481	2.81816e-39	YALI0D24387G, YALI0D21626G, YALI0E23562G, YALI0E30569G, YALI0D05753G, YALI0C21109G, YALI0B21076G, YALI0E00550G, YALI0E34826G, YALI0B20504G, YALI0F05522G, YALI0F24013G, YALI0C07887G, YALI0B12848G, YALI0D00561G, YALI0E25025G, YALI0F25531G, YALI0B11308G, YALI0E20493G, YALI0F24497G, YALI0E29073G, YALI0A10725G, YALI0B08866G, YALI0F24739G, YALI0E21219G, YALI0E14124G, YALI0E27830G, YALI0C06820G, YALI0B1…	167	176	1090	3.4489	2.78998e-37	1.39499e-37	3.12206e-36
SP_PIR_KEYWORDS	ribosomal protein	39	7.44275	1.05948e-28	YALI0D24387G, YALI0E31911G, YALI0E23562G, YALI0B04224G, YALI0F05544G, YALI0D05753G, YALI0D13728G, YALI0E30602G, YALI0F05676G, YALI0F25399G, YALI0E34826G, YALI0F05803G, YALI0B12848G, YALI0C15895G, YALI0B06116G, YALI0E23584G, YALI0F06160G, YALI0F20482G, YALI0F25531G, YALI0B11308G, YALI0B06578G, YALI0D20614G, YALI0C21560G, YALI0B11000G, YALI0D12903G, YALI0E27830G, YALI0D22088G, YALI0E23694G, YALI0D0…	519	57	6434	8.4821	1.27138e-26	1.27138e-26	1.21621e-25
GOTERM_CC_FAT	GO:0043228~non-membrane-bounded organelle	104	19.8473	4.90825e-27	YALI0D21626G, YALI0E23562G, YALI0A08107G, YALI0C21109G, YALI0B21076G, YALI0E00550G, YALI0F05522G, YALI0C07887G, YALI0E01782G, YALI0E25025G, YALI0B12320G, YALI0B11308G, YALI0E20493G, YALI0B08866G, YALI0B12804G, YALI0B22594G, YALI0B05896G, YALI0E01452G, YALI0A20746G, YALI0D13882G, YALI0E32208G, YALI0F04576G, YALI0E31911G, YALI0A11157G, YALI0B15103G, YALI0D13728G, YALI0D11462G, YALI0E22352G, YALI0F2…	167	284	1090	2.39015	4.85917e-25	1.61972e-25	5.43753e-24
GOTERM_CC_FAT	GO:0043232~intracellular non-membrane-bounded organelle	104	19.8473	4.90825e-27	YALI0D21626G, YALI0E23562G, YALI0A08107G, YALI0C21109G, YALI0B21076G, YALI0E00550G, YALI0F05522G, YALI0C07887G, YALI0E01782G, YALI0E25025G, YALI0B12320G, YALI0B11308G, YALI0E20493G, YALI0B08866G, YALI0B12804G, YALI0B22594G, YALI0B05896G, YALI0E01452G, YALI0A20746G, YALI0D13882G, YALI0E32208G, YALI0F04576G, YALI0E31911G, YALI0A11157G, YALI0B15103G, YALI0D13728G, YALI0D11462G, YALI0E22352G, YALI0F2…	167	284	1090	2.39015	4.85917e-25	1.61972e-25	5.43753e-24
SP_PIR_KEYWORDS	ribonucleoprotein	40	7.63359	3.63379e-26	YALI0D24387G, YALI0E31911G, YALI0E23562G, YALI0B04224G, YALI0F05544G, YALI0D05753G, YALI0D13728G, YALI0E30602G, YALI0F05676G, YALI0F25399G, YALI0E34826G, YALI0F05803G, YALI0B12848G, YALI0C15895G, YALI0B06116G, YALI0E23584G, YALI0F06160G, YALI0F20482G, YALI0F25531G, YALI0B11308G, YALI0F24497G, YALI0B06578G, YALI0D20614G, YALI0C21560G, YALI0B11000G, YALI0D12903G, YALI0E27830G, YALI0D22088G, YALI0E2…	519	67	6434	7.40114	4.36054e-24	2.18027e-24	4.17134e-23
Annotation Cluster 2	Enrichment Score: 3.928740314429473
Category	Term	Count	%	PValue	Genes	List Total	Pop Hits	Pop Total	Fold Enrichment	Bonferroni	Benjamini	FDR
KEGG_PATHWAY	yli00240:Pyrimidine metabolism	26	4.96183	7.16616e-07	YALI0F04576G, YALI0F17534G, YALI0F19448G, YALI0F21527G, YALI0F05082G, YALI0B05368G, YALI0A08151G, YALI0B11396G, YALI0D05093G, YALI0C23210G, YALI0E18832G, YALI0C10901G, YALI0D07788G, YALI0F06182G, YALI0F28215G, YALI0C13354G, YALI0D22308G, YALI0D11396G, YALI0D01782G, YALI0D06457G, YALI0F05566G, YALI0E05225G, YALI0D26301G, YALI0E27676G, YALI0E11869G, YALI0B18414G	179	62	1167	2.73401	3.65468e-05	1.82736e-05	0.00069325
GOTERM_MF_FAT	GO:0003899~DNA-directed RNA polymerase activity	14	2.67176	2.38761e-06	YALI0D22308G, YALI0D11396G, YALI0F04576G, YALI0F17534G, YALI0F05082G, YALI0A08151G, YALI0B04851G, YALI0B11396G, YALI0D06457G, YALI0F05566G, YALI0F06182G, YALI0D26301G, YALI0E05225G, YALI0E27676G	301	28	2705	4.49336	0.000611042	0.000203722	0.00311326
GOTERM_MF_FAT	GO:0034062~RNA polymerase activity	14	2.67176	2.38761e-06	YALI0D22308G, YALI0D11396G, YALI0F04576G, YALI0F17534G, YALI0F05082G, YALI0A08151G, YALI0B04851G, YALI0B11396G, YALI0D06457G, YALI0F05566G, YALI0F06182G, YALI0D26301G, YALI0E05225G, YALI0E27676G	301	28	2705	4.49336	0.000611042	0.000203722	0.00311326
KEGG_PATHWAY	yli03020:RNA polymerase	13	2.48092	0.000151675	YALI0D11396G, YALI0D22308G, YALI0F17534G, YALI0D01782G, YALI0F05082G, YALI0A08151G, YALI0D06457G, YALI0F05566G, YALI0F06182G, YALI0D07788G, YALI0D26301G, YALI0E05225G, YALI0E27676G	179	26	1167	3.25978	0.00770619	0.00257536	0.146634
GOTERM_MF_FAT	GO:0016779~nucleotidyltransferase activity	21	4.00763	0.00049635	YALI0D22308G, YALI0D11396G, YALI0F04576G, YALI0F17534G, YALI0E08184G, YALI0F23947G, YALI0A08151G, YALI0F05082G, YALI0B11396G, YALI0B04851G, YALI0D06457G, YALI0C01573G, YALI0D05093G, YALI0E18832G, YALI0F05566G, YALI0F06182G, YALI0E05225G, YALI0D26301G, YALI0F28215G, YALI0E27676G, YALI0E11869G	301	83	2705	2.27375	0.119352	0.0209601	0.645282
KEGG_PATHWAY	yli00230:Purine metabolism	21	4.00763	0.00584354	YALI0D22308G, YALI0D11396G, YALI0F04576G, YALI0F17534G, YALI0E32351G, YALI0D01782G, YALI0A08151G, YALI0F05082G, YALI0B11396G, YALI0D06457G, YALI0D05093G, YALI0E18832G, YALI0F05566G, YALI0F06182G, YALI0D07788G, YALI0D26301G, YALI0E05225G, YALI0F28215G, YALI0E27676G, YALI0E11869G, YALI0B18414G	179	75	1167	1.82547	0.258363	0.0580273	5.51188
GOTERM_BP_FAT	GO:0006350~transcription	22	4.19847	0.175479	YALI0D22308G, YALI0B12166G, YALI0D11396G, YALI0A01375G, YALI0A08107G, YALI0F17534G, YALI0E28490G, YALI0E02772G, YALI0F28435G, YALI0A08151G, YALI0F05082G, YALI0B04851G, YALI0D06457G, YALI0C23320G, YALI0F22136G, YALI0F05566G, YALI0F06182G, YALI0E05225G, YALI0D26301G, YALI0F17688G, YALI0E27676G, YALI0E17809G	274	145	2326	1.28799	1	0.934775	93.0974
Annotation Cluster 3	Enrichment Score: 2.4157403297287945
Category	Term	Count	%	PValue	Genes	List Total	Pop Hits	Pop Total	Fold Enrichment	Bonferroni	Benjamini	FDR
KEGG_PATHWAY	yli03030:DNA replication	15	2.8626	0.00027487	YALI0F20042G, YALI0E10725G, YALI0F04576G, YALI0A02068G, YALI0B11396G, YALI0B18722G, YALI0C21692G, YALI0D05093G, YALI0D23661G, YALI0E18832G, YALI0E10747G, YALI0D10571G, YALI0F28215G, YALI0E11869G, YALI0B18414G	179	35	1167	2.79409	0.0139225	0.00349894	0.265591
SP_PIR_KEYWORDS	dna replication	9	1.71756	0.000710181	YALI0B17820G, YALI0A09746G, YALI0D10571G, YALI0E15884G, YALI0F28215G, YALI0E08184G, YALI0E11869G, YALI0B11396G, YALI0B18722G	519	26	6434	4.29124	0.0817191	0.0169059	0.812212
GOTERM_BP_FAT	GO:0006260~DNA replication	16	3.05344	0.0133434	YALI0F04576G, YALI0A09746G, YALI0E15884G, YALI0A02068G, YALI0E08184G, YALI0B11396G, YALI0B18722G, YALI0C21692G, YALI0D05093G, YALI0B17820G, YALI0E18832G, YALI0E10747G, YALI0D10571G, YALI0B06369G, YALI0F28215G, YALI0E11869G	274	70	2326	1.94035	0.994092	0.401392	16.9819
GOTERM_BP_FAT	GO:0006259~DNA metabolic process	25	4.77099	0.0834214	YALI0B06512G, YALI0F04576G, YALI0A09746G, YALI0C12144G, YALI0A02068G, YALI0B10197G, YALI0B11396G, YALI0D05093G, YALI0C21692G, YALI0B17820G, YALI0E18832G, YALI0F25905G, YALI0E10747G, YALI0D10571G, YALI0A08580G, YALI0F17688G, YALI0F28215G, YALI0E26477G, YALI0F20042G, YALI0E15884G, YALI0E08184G, YALI0B18722G, YALI0C01573G, YALI0B06369G, YALI0E11869G	274	154	2326	1.37809	1	0.810573	70.0858
Annotation Cluster 4	Enrichment Score: 2.2903907734640683
Category	Term	Count	%	PValue	Genes	List Total	Pop Hits	Pop Total	Fold Enrichment	Bonferroni	Benjamini	FDR
GOTERM_MF_FAT	GO:0019843~rRNA binding	7	1.33588	4.09626e-05	YALI0E29073G, YALI0C24057G, YALI0F05544G, YALI0F17380G, YALI0D12903G, YALI0E01452G, YALI0E22352G	301	8	2705	7.86337	0.0104318	0.00209513	0.0533996
SMART	SM00363:S4	3	0.572519	0.0467695	YALI0F05544G, YALI0F17380G, YALI0D12903G	114	5	1528	8.04211	0.955551	0.463496	38.6258
INTERPRO	IPR002942:RNA-binding S4	3	0.572519	0.0702227	YALI0F05544G, YALI0F17380G, YALI0D12903G	456	5	4938	6.49737	1	0.99249	66.9117
Annotation Cluster 5	Enrichment Score: 2.019246827813284
Category	Term	Count	%	PValue	Genes	List Total	Pop Hits	Pop Total	Fold Enrichment	Bonferroni	Benjamini	FDR
INTERPRO	IPR004038:Ribosomal protein L7Ae/L30e/S12e/Gadd45	5	0.954198	0.000330079	YALI0F24695G, YALI0E23562G, YALI0F06160G, YALI0F20768G, YALI0F24497G	456	5	4938	10.8289	0.216488	0.216488	0.500219
INTERPRO	IPR004037:Ribosomal protein L7Ae conserved site	3	0.572519	0.0238647	YALI0F24695G, YALI0F20768G, YALI0F24497G	456	3	4938	10.8289	1	0.892604	30.7122
INTERPRO	IPR018492:Ribosomal protein L7A/RS6 family	3	0.572519	0.0238647	YALI0F24695G, YALI0F20768G, YALI0F24497G	456	3	4938	10.8289	1	0.892604	30.7122
PIR_SUPERFAMILY	PIRSF002165:ribosomal protein, L7Ab/L7Aa/L7Ae/L8e types/H/ACA ribonucleoprotein complex, NHP2 subunit	3	0.572519	0.0445537	YALI0F24695G, YALI0F20768G, YALI0F24497G	161	3	1253	7.78261	0.999834	0.999834	43.2746
Annotation Cluster 6	Enrichment Score: 1.9806652070555932
Category	Term	Count	%	PValue	Genes	List Total	Pop Hits	Pop Total	Fold Enrichment	Bonferroni	Benjamini	FDR
SMART	SM00651:Sm	6	1.14504	0.00236225	YALI0D01155G, YALI0A04961G, YALI0D14102G, YALI0A19756G, YALI0F06644G, YALI0B06534G	114	14	1528	5.74436	0.142495	0.142495	2.38163
INTERPRO	IPR006649:Like-Sm ribonucleoprotein, eukaryotic and archaea-type, core	6	1.14504	0.00644113	YALI0D01155G, YALI0A04961G, YALI0D14102G, YALI0A19756G, YALI0F06644G, YALI0B06534G	456	14	4938	4.64098	0.991565	0.908159	9.34939
INTERPRO	IPR001163:Like-Sm ribonucleoprotein, core	6	1.14504	0.00644113	YALI0D01155G, YALI0A04961G, YALI0D14102G, YALI0A19756G, YALI0F06644G, YALI0B06534G	456	14	4938	4.64098	0.991565	0.908159	9.34939
KEGG_PATHWAY	yli03040:Spliceosome	17	3.24427	0.121924	YALI0D01155G, YALI0E27715G, YALI0E30569G, YALI0A11157G, YALI0A04961G, YALI0A20768G, YALI0D26664G, YALI0D08184G, YALI0B06534G, YALI0E29293G, YALI0C03982G, YALI0D14102G, YALI0D00561G, YALI0E28226G, YALI0A19756G, YALI0F06644G, YALI0F24497G	179	78	1167	1.42093	0.998681	0.668851	71.5729
Annotation Cluster 7	Enrichment Score: 1.6100503832089013
Category	Term	Count	%	PValue	Genes	List Total	Pop Hits	Pop Total	Fold Enrichment	Bonferroni	Benjamini	FDR
KEGG_PATHWAY	yli03030:DNA replication	15	2.8626	0.00027487	YALI0F20042G, YALI0E10725G, YALI0F04576G, YALI0A02068G, YALI0B11396G, YALI0B18722G, YALI0C21692G, YALI0D05093G, YALI0D23661G, YALI0E18832G, YALI0E10747G, YALI0D10571G, YALI0F28215G, YALI0E11869G, YALI0B18414G	179	35	1167	2.79409	0.0139225	0.00349894	0.265591
KEGG_PATHWAY	yli03430:Mismatch repair	6	1.14504	0.17724	YALI0D05093G, YALI0C21692G, YALI0E10747G, YALI0D10571G, YALI0A02068G, YALI0B18414G	179	20	1167	1.95587	0.999952	0.668958	84.8519
KEGG_PATHWAY	yli03420:Nucleotide excision repair	8	1.52672	0.303502	YALI0D05093G, YALI0C21692G, YALI0E10747G, YALI0D10571G, YALI0A02068G, YALI0F28215G, YALI0F17688G, YALI0B18414G	179	36	1167	1.44879	1	0.813052	96.9772
Annotation Cluster 8	Enrichment Score: 1.5878602192065818
Category	Term	Count	%	PValue	Genes	List Total	Pop Hits	Pop Total	Fold Enrichment	Bonferroni	Benjamini	FDR
GOTERM_BP_FAT	GO:0006730~one-carbon metabolic process	7	1.33588	0.00327712	YALI0E00660G, YALI0F18414G, YALI0E22913G, YALI0B14509G, YALI0F22737G, YALI0F11759G, YALI0C13882G	274	14	2326	4.24453	0.714615	0.2691	4.44591
GOTERM_BP_FAT	GO:0032259~methylation	5	0.954198	0.021939	YALI0E00660G, YALI0F18414G, YALI0E22913G, YALI0F22737G, YALI0C13882G	274	10	2326	4.24453	0.999791	0.506467	26.4599
GOTERM_BP_FAT	GO:0043414~biopolymer methylation	3	0.572519	0.239723	YALI0E00660G, YALI0E22913G, YALI0F22737G	274	8	2326	3.18339	1	0.954008	97.7566
Annotation Cluster 9	Enrichment Score: 1.5767747617906054
Category	Term	Count	%	PValue	Genes	List Total	Pop Hits	Pop Total	Fold Enrichment	Bonferroni	Benjamini	FDR
GOTERM_BP_FAT	GO:0006220~pyrimidine nucleotide metabolic process	5	0.954198	0.00487104	YALI0C10901G, YALI0F19448G, YALI0F21527G, YALI0C13354G, YALI0B05368G	274	7	2326	6.06361	0.845148	0.311374	6.54135
GOTERM_BP_FAT	GO:0009394~2'-deoxyribonucleotide metabolic process	3	0.572519	0.0379904	YALI0C10901G, YALI0F19448G, YALI0C13354G	274	3	2326	8.48905	1	0.627063	41.5267
GOTERM_BP_FAT	GO:0009219~pyrimidine deoxyribonucleotide metabolic process	3	0.572519	0.0379904	YALI0C10901G, YALI0F19448G, YALI0C13354G	274	3	2326	8.48905	1	0.627063	41.5267
GOTERM_BP_FAT	GO:0009262~deoxyribonucleotide metabolic process	3	0.572519	0.0701345	YALI0C10901G, YALI0F19448G, YALI0C13354G	274	4	2326	6.36679	1	0.7863	63.4847
Annotation Cluster 10	Enrichment Score: 1.4063805168173804
Category	Term	Count	%	PValue	Genes	List Total	Pop Hits	Pop Total	Fold Enrichment	Bonferroni	Benjamini	FDR
INTERPRO	IPR012677:Nucleotide-binding, alpha-beta plait	12	2.29008	0.0218063	YALI0E25872G, YALI0D05547G, YALI0E29293G, YALI0E03828G, YALI0C16368G, YALI0B12364G, YALI0D13728G, YALI0D21450G, YALI0B20460G, YALI0A03773G, YALI0F25531G, YALI0D23375G	456	61	4938	2.13028	1	0.90247	28.4593
SMART	SM00360:RRM	10	1.9084	0.0287175	YALI0E25872G, YALI0D05547G, YALI0E29293G, YALI0E03828G, YALI0C16368G, YALI0B12364G, YALI0D21450G, YALI0B20460G, YALI0A03773G, YALI0D23375G	114	60	1528	2.23392	0.849526	0.468112	25.6936
INTERPRO	IPR000504:RNA recognition motif, RNP-1	10	1.9084	0.0964118	YALI0E25872G, YALI0D05547G, YALI0E29293G, YALI0E03828G, YALI0C16368G, YALI0B12364G, YALI0D21450G, YALI0B20460G, YALI0A03773G, YALI0D23375G	456	60	4938	1.80482	1	0.996859	78.5617
Annotation Cluster 11	Enrichment Score: 1.3626681376985272
Category	Term	Count	%	PValue	Genes	List Total	Pop Hits	Pop Total	Fold Enrichment	Bonferroni	Benjamini	FDR
SMART	SM00661:RPOL9	3	0.572519	0.0154834	YALI0D22308G, YALI0F17534G, YALI0A08151G	114	3	1528	13.4035	0.637342	0.397789	14.7039
SP_PIR_KEYWORDS	dna-directed rna polymerase	5	0.954198	0.0165107	YALI0D22308G, YALI0F17534G, YALI0A08151G, YALI0B11396G, YALI0D06457G	519	13	6434	4.76805	0.864369	0.220987	17.3961
INTERPRO	IPR001529:DNA-directed RNA polymerase, M/15 kDa subunit	3	0.572519	0.0238647	YALI0D22308G, YALI0F17534G, YALI0A08151G	456	3	4938	10.8289	1	0.892604	30.7122
SMART	SM00440:ZnF_C2C2	3	0.572519	0.0294741	YALI0D22308G, YALI0F17534G, YALI0A08151G	114	4	1528	10.0526	0.856958	0.385013	26.2814
INTERPRO	IPR001222:Zinc finger, TFIIS-type	3	0.572519	0.0448324	YALI0D22308G, YALI0F17534G, YALI0A08151G	456	4	4938	8.12171	1	0.966281	50.1795
COG_ONTOLOGY	Transcription	5	0.954198	0.0998668	YALI0D22308G, YALI0D11396G, YALI0F22136G, YALI0F17534G, YALI0A08151G	54	28	821	2.71495	0.89024	0.521207	55.6201
SP_PIR_KEYWORDS	zinc-finger	8	1.52672	0.359321	YALI0D22308G, YALI0E34826G, YALI0A08580G, YALI0F17534G, YALI0D12056G, YALI0E26048G, YALI0E06545G, YALI0A08151G	519	72	6434	1.37744	1	0.85164	99.3969
